# Supplementary material for: Ruthenium-catalyzed decarboxylative C–S cross-coupling of carbonothioate: synthesis of allyl(aryl)sulfide
Source: Royal Society of Chemistry journal article supplement (doi:10.1039/c8ra04783a), 2018-01-01

# Supporting Information

## **Ruthenium-catalyzed Decarboxylative C-S Cross-Coupling of carbonothioate: Synthesis of allyl(Aryl)sulfide**

Ren-Hua Zheng,<sup>\*a</sup> Hai-Chang Guo,<sup>a</sup> Ting-Ting Chen,<sup>a</sup> Qing Huang,<sup>b</sup> Guo-Bo Huang,<sup>a</sup>  
and Hua-Jiang Jiang<sup>\*a</sup>

<sup>a</sup> School of Pharmaceutical and Chemical Engineering, Taizhou University, Taizhou  
318000, P. R. China.

<sup>b</sup> College of Pharmaceutical Science, Zhejiang University of Technology, Hangzhou  
310014, P. R. China.

| <b>Contents</b>                                                                                                          | <b>Page number</b> |
|--------------------------------------------------------------------------------------------------------------------------|--------------------|
| <b>General</b>                                                                                                           | S2                 |
| <b>Procedure for the synthesis</b>                                                                                       | S2                 |
| <b>1. Preparation of unsubstituted allyl carbonothioates</b>                                                             | S2                 |
| <b>2. Preparation of substituted allyl carbonothioates</b>                                                               | S7                 |
| <b>3. General experimental procedure for ruthenium-catalyzed<br/>        decarboxylative allylic etherification 4a-s</b> | S10                |
| <b><sup>1</sup>H and <sup>13</sup>C NMR spectra</b>                                                                      | S18                |

**GENERAL.** Ethyl acetate (ACS grade), petroleum ether (ACS grade) and dichloromethane (ACS grade) were obtained commercially and used without further purification. Anhydrous 1,2-dichloroethane (HPLC grade) was purified by distillation over calcium hydride. Tetrahydrofuran was distilled over sodium/ benzophenone. Commercially available reagents were used without further purification. Reactions were monitored by thin layer chromatography (TLC) using Silicycle precoated silica gel plates. Flash column chromatography was performed over Silicycle silica gel (300-400 mesh).  $^1\text{H}$  NMR and  $^{13}\text{C}$  NMR spectra were recorded on a Bruker Avance 400 MHz spectrometer using tetramethylsilane (TMS) as internal standards. Infrared spectra were recorded with a Nicolet 5700 spectrometer and are reported in reciprocal centimeter ( $\text{cm}^{-1}$ ). HRESI-MS data were measured on a Synapt G2-Si instrument.

## PROCEDURE FOR THE SYNTHESIS

### 1. Preparation of unsubstituted allyl carbonothioates

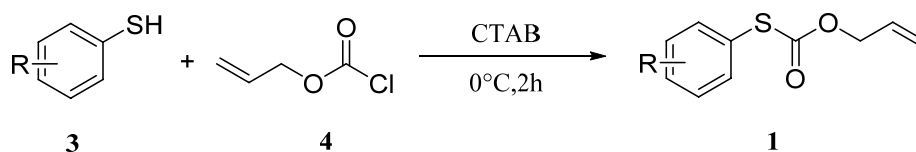

**1a-II** was prepared according to the literature procedure<sup>1</sup>.

The thiophenol **3** (5 mmol) and tetra-*n*-butyl ammonium chloride hydrate (0.035 mmol) were dissolved in dichloromethane (10 mL) and 4M sodium hydroxide (2mL) at 0 °C. Allyl chloroformate **4** (6 mmol) was slowly added and the reaction mixture was stirred for 2 hr. After 2 hr, the two layers were separated and the organic layer was washed with 2M sodium hydroxide (5 mL) and dried over  $\text{MgSO}_4$ . A yellow oil remained after evaporation of the solvent under reduced pressure. This oil was purified by flash column chromatography using ethyl acetate and petroleum ether as an eluent.

### O-allyl S-(*p*-tolyl) carbonothioate (**1a**)

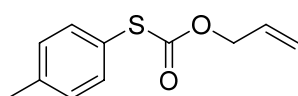

Purified by flash column chromatography (petroleum ether/ethyl acetate, 20/1) to afford **1a** (0.91g, 88%) as pale yellow oil. **<sup>1</sup>H NMR** (400 MHz, CDCl<sub>3</sub>) δ 7.41 (d, *J*=7.8 Hz, 2H), 7.20 (d, *J*=7.8 Hz, 2H), 6.00 – 5.85 (m, 1H), 5.40 – 5.23 (m, 2H), 4.71 (d, *J*=5.8 Hz, 2H), 2.37 (s, 3H); **<sup>13</sup>C NMR** (101 MHz, CDCl<sub>3</sub>) δ 169.90, 139.97, 134.89, 131.37, 130.01, 124.10, 119.28, 68.20, 21.33; **IR** (film) *v*: 2939, 1722, 1448, 1132, 937, 812 cm<sup>-1</sup>; **HRMS** (ESI) calcd for C<sub>11</sub>H<sub>12</sub>O<sub>2</sub>S ([M+Na]<sup>+</sup>): 231.0486; found: 231.0487.

#### O-allyl S-(4-methoxyphenyl) carbonothioate (**1b**)

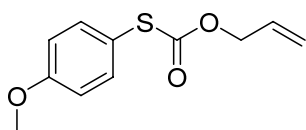

Purified by flash column chromatography (petroleum ether) to afford **1b** (1.0g, 91%) as pale yellow oil. **<sup>1</sup>H NMR** (400 MHz, CDCl<sub>3</sub>) δ 7.50 – 7.39 (m, 2H), 6.96 – 6.85 (m, 2H), 5.97 – 5.84 (m, 1H), 5.39 – 5.22 (m, 2H), 4.70 (dt, *J*=5.8, 1.3 Hz, 2H), 3.81 (s, 3H); **<sup>13</sup>C NMR** (101 MHz, CDCl<sub>3</sub>) δ 170.25, 160.88, 136.67, 131.40, 119.25, 118.27, 114.83, 68.17, 55.37; **IR** (film) *v*: 2945, 2839, 1724, 1593, 1456, 1249, 831 cm<sup>-1</sup>; **HRMS** (ESI) calcd for C<sub>11</sub>H<sub>12</sub>O<sub>3</sub>S ([M+Na]<sup>+</sup>): 247.0405; found: 247.0403.

#### O-allyl S-(naphthalen-2-yl) carbonothioate (**1c**)

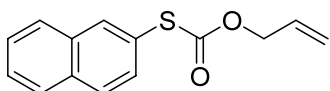

Purified by flash column chromatography (petroleum ether) to afford **1c** (1.07g, 88%) as pale yellow oil. **<sup>1</sup>H NMR** (400 MHz, CDCl<sub>3</sub>) δ 8.05 (s, 1H), 7.87 – 7.80 (m, 3H), 7.58 – 7.50 (m, 3H), 6.01 – 5.84 (m, 1H), 5.38 – 5.26 (m, 2H), 4.75 – 4.69 (m, 2H); **<sup>13</sup>C NMR** (101 MHz, CDCl<sub>3</sub>) δ 169.58, 134.70, 133.45, 133.41, 131.32, 131.21, 128.88, 128.02, 127.79, 127.30, 126.67, 124.90, 119.41, 68.34; **IR** (film) *v*: 3053, 2922, 1624, 1587, 1425, 1226, 920, 812, 742 cm<sup>-1</sup>; **HRMS** (ESI) calcd for C<sub>14</sub>H<sub>12</sub>O<sub>2</sub>S ([M+Na]<sup>+</sup>): 267.0456; found: 267.0455.

#### O-allyl S-(2,6-dimethylphenyl) carbonothioate (**1d**)

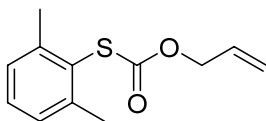

Purified by flash column chromatography (petroleum ether/ethyl acetate, 40/1) to afford **1d** (0.91 g, 82%) as pale yellow oil. **<sup>1</sup>H NMR** (400 MHz, CDCl<sub>3</sub>) δ 7.31 – 7.17 (m, 2H), 7.16 – 7.14 (m, 1H), 5.96 – 5.88 (m, 1H), 5.41 – 5.20 (m, 2H), 4.70 (d, *J*=5.6 Hz, 2H), 2.45 (s, 6H); **<sup>13</sup>C NMR** (101 MHz, CDCl<sub>3</sub>) δ 158.41, 143.33, 131.46, 130.08, 128.34, 126.81, 119.02, 68.01, 21.91; **IR** (film) *v*: 2954, 1722, 1460, 1136, 937, 773 cm<sup>-1</sup>; **HRMS** (ESI) calcd for C<sub>12</sub>H<sub>14</sub>O<sub>2</sub>S ([M+H+Na]<sup>+</sup>): 246.0690; found: 246.0692.

#### O-allyl S-(4-bromophenyl) carbonothioate (**1e**)

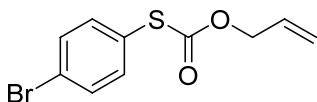

Purified by flash column chromatography (petroleum ether) to afford **1e** (1.22g, 89%) as pale yellow oil. **<sup>1</sup>H NMR** (400 MHz, CDCl<sub>3</sub>) δ 7.52 (d, *J*=8.4 Hz, 2H), 7.39 (d, *J*=8.4 Hz, 2H), 5.95 – 5.87 (m, 1H), 5.37 – 5.28 (m, 2H), 4.73 – 4.71 (m, 2H); **<sup>13</sup>C NMR** (101 MHz, CDCl<sub>3</sub>) δ 168.80, 136.26, 132.40, 131.14, 126.79, 124.34, 119.58, 68.52; **IR** (film) *v*: 3086, 2947, 1726, 1471, 1132, 939, 819 cm<sup>-1</sup>; **HRMS** (ESI) calcd for C<sub>10</sub>H<sub>9</sub>BrO<sub>2</sub>S ([M+Na]<sup>+</sup>): 294.9404; found: 294.9402.

#### O-allyl S-(2-bromophenyl) carbonothioate (**1f**)

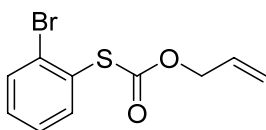

Purified by flash column chromatography (petroleum ether) to afford **1f** (1.13g, 87%) as pale yellow oil. **<sup>1</sup>H NMR** (400 MHz, CDCl<sub>3</sub>) δ 7.73 – 7.65 (m, 2H), 7.35 – 7.24 (m, 2H), 6.00 – 5.86 (m, 1H), 5.41 – 5.24 (m, 2H), 4.74 (d, *J*=5.9 Hz, 1H); **<sup>13</sup>C NMR** (101 MHz, CDCl<sub>3</sub>) δ 167.86, 137.34, 133.62, 131.36, 131.17, 129.94, 129.34, 128.02, 119.40, 68.54; **IR** (film) *v*: 3086, 2949, 1728, 1450, 1267, 1141, 1022, 939, 754 cm<sup>-1</sup>; **HRMS** (ESI) calcd for C<sub>10</sub>H<sub>9</sub>BrO<sub>2</sub>S ([M+Na]<sup>+</sup>): 294.9404; found: 294.9406.

### O-allyl S-(4-chlorophenyl) carbonothioate (**1g**)

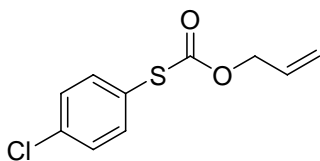

Purified by flash column chromatography (petroleum ether/ethyl acetate, 40/1) to afford **1g** (1.04g, 90%) as pale yellow oil. **<sup>1</sup>H NMR** (400 MHz, CDCl<sub>3</sub>) δ 7.50 – 7.42 (m, 2H), 7.40 – 7.34 (m, 2H), 5.98 – 5.88 (m, 1H), 5.41 – 5.25 (m, 2H), 4.72 (dt, *J*=5.9, 1.3 Hz, 2H); **<sup>13</sup>C NMR** (101 MHz, CDCl<sub>3</sub>) δ 168.97, 136.10, 136.06, 131.14, 129.44, 126.15, 119.56, 68.50; **IR** (film) *v*: 3086, 2947, 1726, 1475, 1136, 939, 825 cm<sup>-1</sup>; **HRMS** (ESI) calcd for C<sub>10</sub>H<sub>9</sub>ClO<sub>2</sub>S ([M+Na]<sup>+</sup>): 250.9909; found: 250.9906.

### O-allyl S-benzyl carbonothioate (**1h**)

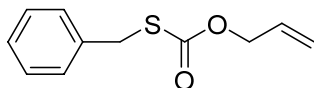

Purified by flash column chromatography (petroleum ether) to afford **1h** (0.87g, 83%) as pale yellow oil. **<sup>1</sup>H NMR** (400 MHz, CDCl<sub>3</sub>) δ 7.38 – 7.21 (m, 5H), 5.99 – 5.83 (m, 1H), 5.42 – 5.21 (m, 2H), 4.71 (d, *J*=5.8, 1.4 Hz, 2H), 4.11 (s, 2H); **<sup>13</sup>C NMR** (101 MHz, CDCl<sub>3</sub>) δ 170.56, 137.13, 131.45, 128.86, 128.64, 127.46, 119.17, 67.97, 35.41; **IR** (film) *v*: 2927, 1710, 1452, 1136, 935, 704 cm<sup>-1</sup>; **HRMS** (ESI) calcd for C<sub>11</sub>H<sub>12</sub>O<sub>2</sub>S ([M+Na]<sup>+</sup>): 231.0456; found: 231.0453.

### O-allyl S-butyl carbonothioate (**1i**)

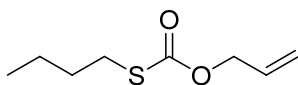

Purified by flash column chromatography (petroleum ether/ethyl acetate, 40/1) to afford **1i** (0.79g, 90%) as pale yellow oil. **<sup>1</sup>H NMR** (400 MHz, CDCl<sub>3</sub>) δ 5.99 – 5.86 (m, 1H), 5.39 – 5.22 (m, 2H), 4.71 – 4.69 (m, 2H), 2.87 (t, *J*=7.4 Hz, 2H), 1.69-1.56 (m, 2H), 1.44 – 1.39 (m, 2H), 0.93 (t, *J*=7.3 Hz, 3H); **<sup>13</sup>C NMR** (101 MHz, CDCl<sub>3</sub>) δ 171.12, 131.60, 118.94, 67.63, 31.80, 30.73, 21.80, 13.54; **IR** (film) *v*: 2960, 2873, 1712, 1458, 1138, 935 cm<sup>-1</sup>; **HRMS** (ESI) calcd for C<sub>8</sub>H<sub>14</sub>O<sub>2</sub>S ([M+Na]<sup>+</sup>): 197.0612; found: 197.0615.

### O-allyl S-(4-nitrophenyl) carbonothioate (**1j**)

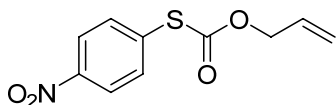

Purified by flash column chromatography (petroleum ether/ethyl acetate, 40/1) to afford **1j** (1.04g, 87%) as pale yellow solid. Mp: 68-70 °C;  $^1\text{H NMR}$  (400 MHz,  $\text{CDCl}_3$ )  $\delta$  8.24 (d,  $J=8.9$  Hz, 2H), 7.73 (d,  $J=8.9$  Hz, 2H), 5.96 – 5.89 (m, 1H), 5.56 – 5.18 (m, 2H), 4.77 (d,  $J=5.9$  Hz, 2H);  $^{13}\text{C NMR}$  (101 MHz,  $\text{CDCl}_3$ )  $\delta$  167.38, 148.16, 136.35, 134.61, 130.82, 123.94, 120.00, 68.97; **IR** (film)  $\nu$ : 3097, 1720, 1512, 1344, 1161, 943, 846  $\text{cm}^{-1}$ ; **HRMS** (ESI) calcd for  $\text{C}_{10}\text{H}_9\text{NO}_4\text{S}$  ( $[\text{M}+\text{Na}]^+$ ): 262.0150; found: 262.0153.

### O-allyl S-(pyridin-3-yl) carbonothioate (**1k**)

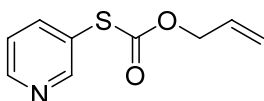

Purified by flash column chromatography (petroleum ether/ethyl acetate, 10/1) to afford **1k** (0.85g, 86%) as pale yellow oil.  $^1\text{H NMR}$  (400 MHz,  $\text{CDCl}_3$ )  $\delta$  8.64 – 8.56 (m, 1H), 7.77 – 7.69 (m, 2H), 7.29 – 7.25 (m, 1H), 6.00 – 5.87 (m, 1H), 5.39 – 5.27 (m, 2H), 4.76 (d,  $J=5.9$  Hz, 2H);  $^{13}\text{C NMR}$  (101 MHz,  $\text{CDCl}_3$ )  $\delta$  168.25, 151.71, 150.16, 137.26, 131.10, 129.38, 123.46, 119.55, 68.42; **IR** (film)  $\nu$ : 2949, 1724, 1570, 1450, 1145, 941, 767  $\text{cm}^{-1}$ ; **HRMS** (ESI) calcd for  $\text{C}_9\text{H}_9\text{NO}_2\text{S}$  ( $[\text{M}+\text{H}]^+$ ): 196.0432; found: 196.0431.

### O-allyl S-(benzo[d]thiazol-2-yl) carbonothioate (**1l**)

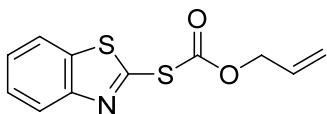

Purified by flash column chromatography (petroleum ether/ethyl acetate, 40/1) to afford **1l** (1.08g, 86%) as pale yellow oil.  $^1\text{H NMR}$  (400 MHz,  $\text{CDCl}_3$ )  $\delta$  8.08–7.95 (m, 1H), 7.94–7.82 (m, 1H), 7.52 – 7.40 (m, 2H), 6.02 – 5.92 (m, 1H), 5.48–5.31 (m, 2H), 4.84 (dt,  $J=6.0, 1.3$  Hz, 2H);  $^{13}\text{C NMR}$  (101 MHz,  $\text{CDCl}_3$ )  $\delta$  166.00, 157.78, 152.08, 136.51, 130.52, 126.41, 125.62, 123.08, 121.14, 120.41, 69.44; **IR** (film)  $\nu$ : 3062, 1728, 1419, 1147, 1001, 1147, 759  $\text{cm}^{-1}$ ; **HRMS** (ESI) calcd for  $\text{C}_{11}\text{H}_9\text{NO}_2\text{S}_2$  ( $[\text{M}+\text{H}]^+$ ): 252.0153; found: 252.0152.

## 2. Preparation of substituted allyl carbonothioates

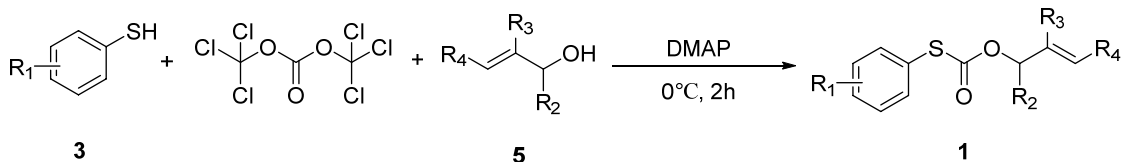

**1m-1t** was prepared according to the literature procedure<sup>2</sup>.

To a solution of a substituted thiophenol **3** (5 mmol) and triphosgene (1.8 mmol) in dry dichloromethane (30 mL) was added 4-dimethylaminopyridine (DMAP) (5 mmol) dropwise at 0 °C. The resulting mixture was stirred for 30 min at that temperature, and then an allylic alcohol **5** (5 mmol) and DMAP (6 mmol) were sequentially added. After stirring for 2 h, the reaction mixture was quenched by adding H<sub>2</sub>O (20 mL). The organic phase was separated, dried over Na<sub>2</sub>SO<sub>4</sub>, concentrated in vacuo, and the residue was purified by flash chromatography. The following compounds were synthesized:

### S-(2-methoxyphenyl) O-(2-methylallyl) carbonothioate (**1m**)

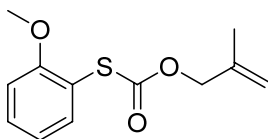

Purified by flash column chromatography (petroleum ether/ethyl acetate, 80/1) to afford **1m** as pale yellow oil (0.83g, 70%). <sup>1</sup>H NMR (400 MHz, CDCl<sub>3</sub>) δ 7.51 (dd, J = 8.2, 1.6 Hz, 1H), 7.41 (dd, J = 8.2, 1.6 Hz, 1H), 7.01 – 6.93 (m, 2H), 4.99 (s, 1H), 4.94 (s, 1H), 4.62 (s, 2H), 3.88 (d, J = 8.6 Hz, 3H), 1.75 (s, 3H); <sup>13</sup>C NMR (101 MHz, CDCl<sub>3</sub>) δ 168.84, 159.63, 139.33, 137.06, 131.92, 121.02, 115.87, 113.77, 111.56, 70.75, 56.00, 19.36; IR (film) ν: 2939, 1726, 1479, 1277, 1139, 1069, 1024, 754 cm<sup>-1</sup>; HRMS (ESI) calcd for C<sub>12</sub>H<sub>14</sub>O<sub>3</sub>S ([M+Na]<sup>+</sup>): 261.0561; found: 261.0563.

### S-(4-bromophenyl) O-(2-methylallyl) carbonothioate (**1n**)

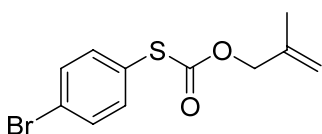

Purified by flash column chromatography (petroleum ether/ethyl acetate, 40/1) to afford **1n** as pale yellow oil (1.06g, 74%). **<sup>1</sup>H NMR** (400 MHz, CDCl<sub>3</sub>) δ 7.53 (d, *J* = 8.5 Hz, 2H), 7.39 (d, *J* = 8.5 Hz, 2H), 4.99 (d, *J* = 6.1 Hz, 1H), 4.97 (s, 1H), 4.64 (s, 2H), 1.76 (s, 3H); **<sup>13</sup>C NMR** (101 MHz, CDCl<sub>3</sub>) δ 168.83, 139.03, 136.28, 132.40, 126.86, 124.33, 114.31, 71.21, 19.39; **IR** (film) *v*: 2976, 2941, 1726, 1472, 1387, 1138, 1090, 912, 817 cm<sup>-1</sup>; **HRMS** (ESI) calcd for C<sub>11</sub>H<sub>11</sub>BrO<sub>2</sub>S ([M+Na]<sup>+</sup>): 308.9561; found: 308.9560.

#### O-cinnamyl S-(p-tolyl) carbonothioate (**1o**)

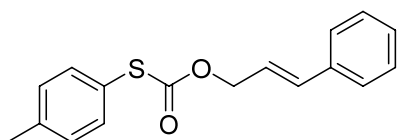

Purified by flash column chromatography (petroleum ether/ethyl acetate, 40/1) to afford **1o** as pale yellow oil (0.97g, 68%). Mp: 83-85 °C; **<sup>1</sup>H NMR** (400 MHz, CDCl<sub>3</sub>) δ 7.48 – 7.15 (m, 9H), 6.64 (d, *J* = 15.7 Hz, 1H), 6.38 – 6.16 (m, 1H), 4.85 (d, *J* = 5.6 Hz, 2H), 2.36 (s, 3H); **<sup>13</sup>C NMR** (101 MHz, CDCl<sub>3</sub>) δ 170.01, 140.00, 136.04, 135.31, 134.97, 130.07, 128.67, 128.31, 126.78, 124.26, 122.29, 68.26, 21.38; **IR** (film) *v*: 2941, 1726, 1472, 1386, 1138, 1069, 912, 817 cm<sup>-1</sup>; **HRMS** (ESI) calcd for C<sub>17</sub>H<sub>16</sub>O<sub>2</sub>S ([M+Na]<sup>+</sup>): 307.0769; found: 307.0766.

#### S-(4-bromophenyl) O-cinnamyl carbonothioate (**1p**)

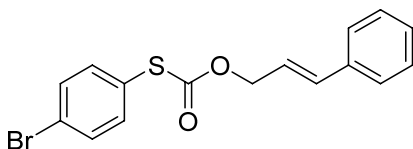

Purified by flash column chromatography (petroleum ether) to afford **1p** as white solid (1.12g, 64%). Mp: 86-89 °C; **<sup>1</sup>H NMR** (400 MHz, CDCl<sub>3</sub>) δ 7.54 – 7.52 (m, 2H), 7.41 – 7.25 (m, 7H), 6.66 (d, *J* = 15.8 Hz, 1H), 6.38 – 6.19 (m, 1H), 4.88 (d, *J* = 6.1 Hz, 2H); **<sup>13</sup>C NMR** (101 MHz, CDCl<sub>3</sub>) δ 168.92, 136.31, 135.88, 135.64, 132.43, 128.68, 128.39, 126.77, 124.38, 121.94, 68.60; **IR** (film) *v*: 2853, 1717, 1472, 1163, 1092, 923, 819, 740 cm<sup>-1</sup>; **HRMS** (ESI) calcd for C<sub>16</sub>H<sub>13</sub>BrO<sub>2</sub>S ([M+Na]<sup>+</sup>): 370.9717; found: 370.9716.



### S-(4-chlorophenyl) O-cinnamylcarbonothioate (1q)

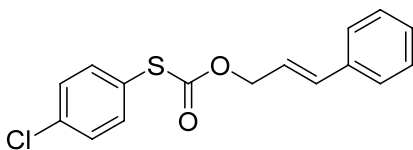

Purified by flash column chromatography (petroleum ether) to afford **1q** as white solid (1.01g, 66%). Mp: 83-85 °C;  $^1\text{H NMR}$  (400 MHz,  $\text{CDCl}_3$ )  $\delta$  7.48 – 7.46 (m, 2H), 7.43 – 7.23 (m, 7H), 6.67 (d,  $J = 15.9$  Hz, 1H), 6.32 – 6.26 (m, 1H), 4.88 (d,  $J = 6.6$  Hz, 2H);  $^{13}\text{C NMR}$  (101 MHz,  $\text{CDCl}_3$ )  $\delta$  169.08, 136.12, 135.89, 135.63, 129.48, 128.68, 128.39, 126.78, 126.22, 121.96, 68.59; **IR** (film)  $\nu$ : 2920, 1737, 1468, 1383, 1087, 970, 808, 756  $\text{cm}^{-1}$ ; **HRMS** (ESI) calcd for  $\text{C}_{16}\text{H}_{13}\text{ClO}_2\text{S}$  ( $[\text{M}+\text{Na}]^+$ ): 327.0222; found: 327.0220.

### S-(2-bromophenyl) O-(but-3-en-2-yl) carbonothioate (1r)

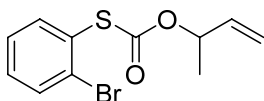

Purified by flash column chromatography (petroleum ether/ethyl acetate, 80/1) to afford **1r** as pale yellow oil (1.05g, 73%).  $^1\text{H NMR}$  (400 MHz,  $\text{CDCl}_3$ )  $\delta$  7.73 – 7.63 (m, 2H), 7.37 – 7.23 (m, 2H), 5.93 – 5.79 (m, 1H), 5.46 – 5.40 (m, 1H), 5.30 – 5.26 (m, 1H), 5.20 – 5.17 (m, 1H), 1.38 (d,  $J = 6.5$  Hz, 3H);  $^{13}\text{C NMR}$  (101 MHz,  $\text{CDCl}_3$ )  $\delta$  167.27, 137.31, 136.67, 133.58, 131.25, 127.97, 116.97, 75.73, 20.00; **IR** (film)  $\nu$ : 2984, 1730, 1449, 1429, 1149, 1022, 845, 752  $\text{cm}^{-1}$ ; **HRMS** (ESI) calcd for  $\text{C}_{11}\text{H}_{11}\text{BrO}_2\text{S}$  ( $[\text{M}+\text{Na}]^+$ ): 308.9561; found: 308.9563.

### O-(but-3-en-2-yl) S-(4-chlorophenyl) carbonothioate (1s)

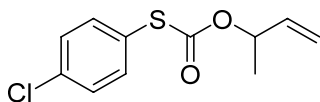

Purified by flash column chromatography (petroleum ether/ethyl acetate, 80/1) to afford **1s** as pale yellow oil (0.89g, 73%).  $^1\text{H NMR}$  (400 MHz,  $\text{CDCl}_3$ )  $\delta$  7.46 (t,  $J = 8.5$  Hz, 2H), 7.36 (d,  $J = 8.5$  Hz, 2H), 5.89 – 5.81 (m, 1H), 5.45 – 5.39 (m, 1H), 5.30 – 5.17 (m, 2H), 1.38 (d,  $J = 6.5$  Hz, 3H);  $^{13}\text{C NMR}$  (101 MHz,  $\text{CDCl}_3$ )  $\delta$  168.39, 136.64, 136.05, 129.39,

126.42, 117.11, 75.69, 19.98; **IR** (film)  $\nu$ : 2985, 1726, 1477, 1150, 1094, 1037, 847, 819  $\text{cm}^{-1}$ ; **HRMS** (ESI) calcd for  $\text{C}_{11}\text{H}_{11}\text{ClO}_2\text{S}$  ( $[\text{M}+\text{Na}]^+$ ): 265.0066; found: 265.0069.

**(E)-O-(but-2-en-1-yl) S-(4-chlorophenyl) carbonothioate (1t)**

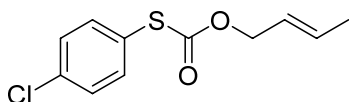

Purified by flash column chromatography (petroleum ether/ethyl acetate, 80/1) to afford **1t** as pale yellow oil (0.91g, 75%).  **$^1\text{H}$  NMR** (400 MHz,  $\text{CDCl}_3$ )  $\delta$  7.44 (d,  $J = 8.3$  Hz, 2H), 7.37 (,  $J = 8.3$  Hz, 2H), 5.90 – 5.76 (m, 1H), 5.67 – 5.54 (m, 1H), 4.65 (d,  $J = 6.7$  Hz, 2H), 1.73 (d,  $J = 6.5$  Hz, 3H);  **$^{13}\text{C}$  NMR** (101 MHz,  $\text{CDCl}_3$ )  $\delta$  168.96, 136.05, 133.14, 129.41, 126.36, 124.19, 68.79, 17.82. **IR** (film)  $\nu$ : 2945, 1724, 1477, 1136, 1092, 1015, 966, 821  $\text{cm}^{-1}$ ; **HRMS** (ESI) calcd for  $\text{C}_{11}\text{H}_{11}\text{ClO}_2\text{S}$  ( $[\text{M}+\text{Na}]^+$ ): 265.0066; found: 265.0067.

**3. General procedure for ruthenium-catalyzed decarboxylative allylic etherification**

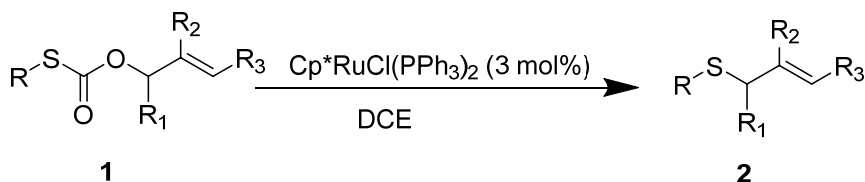

To a 2 dram septum-capped vial were added sequentially **1** (0.3 mmol),  $\text{Cp}^*\text{RuCl}(\text{PPh}_3)_2$  (0.009 mmol, 3 mol%) and 3 mL of dry DCE, and the resulting homogenous solution was stirred at 50 °C until **1** disappeared on TLC. After complete reaction, the solvent was removed under reduced pressure, and the crude product was purified through flash chromatography on silica gel to afford target compounds **2** series as following.

**allyl(p-tolyl)sulfane (2a)**

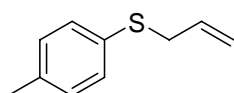

Purified by flash column chromatography (petroleum ether) to afford **2a** (47.3mg, 96%) as pale yellow oil.  **$^1\text{H}$  NMR** (400 MHz,  $\text{CDCl}_3$ )  $\delta$  7.26 (d,  $J=8.0$  Hz, 2H), 7.09 (d,  $J=8.0$

Hz, 2H), 5.91 – 5.81 (m, 1H), 5.13 – 4.98 (m, 1H), 5.07 – 5.02 (m, 1H), 3.50 (d,  $J=6.9$  Hz, 2H), 2.31 (s, 3H);  $^{13}\text{C NMR}$  (101 MHz,  $\text{CDCl}_3$ )  $\delta$  136.43, 133.84, 132.03, 130.70, 129.58, 117.42, 37.91, 21.04. **IR** (film)  $\nu$ : 3018, 2920, 1636, 1492, 1224, 987, 918, 804  $\text{cm}^{-1}$ .

**allyl(4-methoxyphenyl)sulfane (2b)**

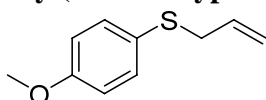

Purified by flash column chromatography (petroleum ether/ethyl acetate, 60/1) to afford **2b** (52.0mg, 94%) as pale yellow oil.  $^1\text{H NMR}$  (400 MHz,  $\text{CDCl}_3$ )  $\delta$  7.36 – 7.32 (m, 1H), 6.85 – 6.81 (m, 1H), 5.93 – 5.77 (m, 1H), 5.06 – 4.93 (m, 2H), 3.79 (s, 3H), 3.43 (d,  $J = 7.1, 1.1$  Hz, 2H);  $^{13}\text{C NMR}$  (101 MHz,  $\text{CDCl}_3$ )  $\delta$  159.08, 134.04, 133.91, 125.81, 117.26, 114.41, 55.30, 39.35; **IR** (film)  $\nu$ : 2922, 1573, 1461, 1205, 1125, 809, 742  $\text{cm}^{-1}$ .

**allyl(naphthalen-2-yl)sulfane (2c)**

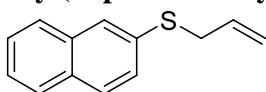

Purified by flash column chromatography (petroleum ether) to afford **2c** (57.7mg, 96%) as pale yellow oil.  $^1\text{H NMR}$  (400 MHz,  $\text{CDCl}_3$ )  $\delta$  7.79 – 7.71 (m, 4H), 7.48 – 7.41 (m, 3H), 5.99 – 5.86 (m, 1H), 5.20-5.05 (m, 2H), 3.65 (d,  $J = 6.8$  Hz, 2H);  $^{13}\text{C NMR}$  (101 MHz,  $\text{CDCl}_3$ )  $\delta$  133.71, 133.48, 133.44, 131.86, 128.28, 127.78, 127.72, 127.71, 127.13, 126.49, 125.71, 117.84, 37.07; **IR** (film)  $\nu$ : 3053, 2922, 1624, 1587, 1425, 1226, 920, 812, 742  $\text{cm}^{-1}$ .

**allyl(2,6-dimethylphenyl)sulfane (2d)**

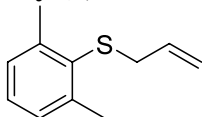

Purified by flash column chromatography (petroleum ether/ethyl acetate, 40/1) to afford **2d** (47.1mg, 88%) as pale yellow oil.  $^1\text{H NMR}$  (400 MHz,  $\text{CDCl}_3$ )  $\delta$  7.12 – 10 (m, 3H), 5.88 – 5.77 (m, 1H), 4.95-4.82 (m, 2H), 3.28 (d,  $J=7.3$  Hz, 2H), 2.53 (s, 6H);  $^{13}\text{C NMR}$  (101 MHz,  $\text{CDCl}_3$ )  $\delta$  143.32, 134.03, 132.86, 128.24, 116.80, 38.37, 22.16; **IR** (film)  $\nu$ : 2953, 2920, 1635, 1460, 1224, 916, 769  $\text{cm}^{-1}$ .

**allyl(4-bromophenyl)sulfane (2e)**

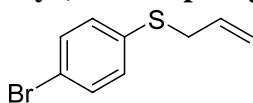

Purified by flash column chromatography (petroleum ether) to afford **2e** (61.9mg, 90%) as pale yellow oil.  $^1\text{H NMR}$  (400 MHz,  $\text{CDCl}_3$ )  $\delta$  7.39 (d,  $J = 8.5$  Hz, 2H), 7.19 (d,  $J = 8.5$  Hz, 2H), 5.88 – 5.79 (m, 1H), 5.14 – 5.07 (m, 2H), 3.53 – 3.51 (m, 2H);  $^{13}\text{C NMR}$  (101 MHz,  $\text{CDCl}_3$ )  $\delta$  135.07, 133.18, 131.82, 131.44, 120.15, 117.99, 37.24; **IR** (film)  $\nu$ : 2922, 1473, 1226, 1091, 920, 808  $\text{cm}^{-1}$ .

**allyl(2-bromophenyl)sulfane (2f)**

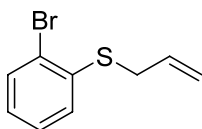

Purified by flash column chromatography (petroleum ether/ethyl acetate, 40/1) to afford **2f** (59.1mg, 86%) as pale yellow oil.  $^1\text{H NMR}$  (400 MHz,  $\text{CDCl}_3$ )  $\delta$  7.54 (s, 1H), 7.30 – 7.23 (m, 2H), 7.03 (s, 1H), 5.99 – 5.82 (m, 1H), 5.33 – 5.05 (m, 2H), 3.60 (d,  $J = 6.7$  Hz, 2H);  $^{13}\text{C NMR}$  (101 MHz,  $\text{CDCl}_3$ )  $\delta$  137.41, 132.96, 132.59, 128.91, 127.60, 126.82, 123.89, 118.48, 36.16; **IR** (film)  $\nu$ : 2922, 1573, 1448, 1109, 921, 742  $\text{cm}^{-1}$ .

**allyl(4-chlorophenyl)sulfane (2g):**

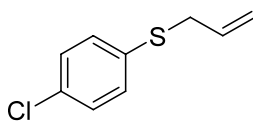

Purified by flash column chromatography (petroleum ether) to afford **2g** (48.7mg, 89%) as pale yellow oil.  $^1\text{H NMR}$  (400 MHz,  $\text{CDCl}_3$ )  $\delta$  7.30 – 7.17 (m, 4H), 5.89 – 5.79 (m, 1H), 5.18 – 5.01 (m, 2H), 3.51 (d,  $J = 6.8$  Hz, 2H);  $^{13}\text{C NMR}$  (101 MHz,  $\text{CDCl}_3$ )  $\delta$  134.34, 133.25, 132.30, 131.34, 128.91, 117.94, 37.45; **IR** (film)  $\nu$ : 3082, 2922, 1635, 1475, 1095, 814, 731  $\text{cm}^{-1}$ .

**allyl(benzyl)sulfane (2h)**

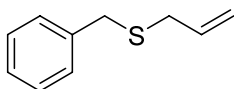

Purified by flash column chromatography (petroleum ether) to afford **2h** (45.2mg, 91%) as pale yellow oil.  $^1\text{H NMR}$  (400 MHz,  $\text{CDCl}_3$ )  $\delta$  7.31 – 7.30 (m, 4H), 7.26 – 7.22 (m, 1H), 5.88 – 5.71 (m, 1H), 5.18 – 5.04 (m, 2H), 3.66 (s, 2H), 3.03 (d,  $J = 7.1$  Hz, 2H);  $^{13}\text{C NMR}$  (101 MHz,  $\text{CDCl}_3$ )  $\delta$  138.32, 134.21, 129.02, 128.47, 126.93, 117.30, 34.94, 34.09; **IR** (film)  $\nu$ : 2924, 1726, 1454, 1271, 916, 769  $\text{cm}^{-1}$ .

### allyl(butyl)sulfane (2i)

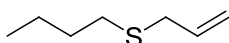

Purified by flash column chromatography (petroleum ether) to afford **2i** (34.0 mg, 87%) as pale yellow oil.  $^1\text{H NMR}$  (400 MHz,  $\text{CDCl}_3$ )  $\delta$  5.85 – 5.74 (m, 1H), 5.14 – 5.08 (m, 1H), 5.06 (d,  $J = 1.2$  Hz, 1H), 3.14 – 3.10 (m, 2H), 2.46 (t,  $J = 8.0$  Hz, 2H), 1.61-1.48 (m, 2H), 1.46-1.32 (m, 2H), 0.91 (t,  $J = 7.3$  Hz, 3H);  $^{13}\text{C NMR}$  (101 MHz,  $\text{CDCl}_3$ )  $\delta$  134.59, 116.64, 34.76, 31.42, 30.38, 21.99, 13.70; **IR** (film)  $\nu$ : 3358, 2922, 2852, 1656, 1462  $\text{cm}^{-1}$ .

### allyl(4-nitrophenyl)sulfane (2j)

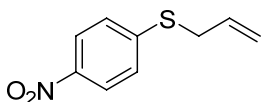

Purified by flash column chromatography (petroleum ether/ethyl acetate,40/1) to afford **2j** (48.6 mg, 83%) as pale yellow oil.  $^1\text{H NMR}$  (400 MHz,  $\text{CDCl}_3$ )  $\delta$  8.12 (d,  $J = 8.9$  Hz, 2H), 7.35 (d,  $J = 8.9$  Hz, 2H), 5.94 – 5.84 (m, 1H), 5.35 – 5.30 (m, 1H), 5.23 – 5.20 (m, 1H), 3.68 (d,  $J = 6.9$  Hz, 2H);  $^{13}\text{C NMR}$  (101 MHz,  $\text{CDCl}_3$ )  $\delta$  146.82, 145.22, 131.95, 126.80, 123.87, 119.05, 35.21; **IR** (film)  $\nu$ : 2920, 1640, 1512, 1336, 1087, 842,  $\text{cm}^{-1}$ .

### 3-(allylthio)pyridine (2k)

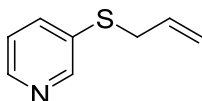

Purified by flash column chromatography (petroleum ether/ethyl acetate,10/1) to afford **2k** (42.8mg,86%) as pale yellow oil.  $^1\text{H NMR}$  (400 MHz,  $\text{CDCl}_3$ )  $\delta$  8.44 – 8.42 (m, 1H),

7.52 – 7.41 (m, 1H), 7.18 – 7.16 (m, 1H), 7.03 – 6.92 (m, 1H), 6.05 – 5.88 (m, 1H), 5.31 – 5.26 (m, 1H), 5.12 – 5.09 (m, 1H), 3.85 – 3.83 (m, 2H);  $^{13}\text{C}$  NMR (101 MHz,  $\text{CDCl}_3$ )  $\delta$  158.58, 149.43, 135.93, 133.84, 122.28, 119.50, 117.51, 33.05; IR (film)  $\nu$ : 2942, 1491, 1224, 987, 913, 803, 765  $\text{cm}^{-1}$ .

### 2-(allylthio)benzo[d]thiazole (2l)

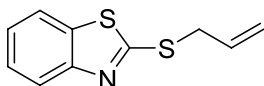

Purified by flash column chromatography (petroleum ether) to afford **2l** (53.90 mg, 87%) as pale yellow oil.  $^1\text{H}$  NMR (400 MHz,  $\text{CDCl}_3$ )  $\delta$  7.88 (dd,  $J=8.0, 1.2$  Hz, 1H), 7.75 (dd,  $J=8.0, 1.2$  Hz, 1H), 7.43 – 7.39 (m, 1H), 7.34–7.22 (m, 1H), 6.08 – 5.97 (m, 1H), 5.41 – 5.36 (m, 1H), 5.22 – 5.19 (m, 1H), 4.00 (dt,  $J=7.0, 1.2$  Hz, 2H);  $^{13}\text{C}$  NMR (101 MHz,  $\text{CDCl}_3$ )  $\delta$  166.18, 153.21, 135.33, 132.32, 126.05, 124.28, 121.59, 120.97, 119.17, 36.26; IR (film)  $\nu$ : 3062, 2922, 1460, 1236, 995, 756  $\text{cm}^{-1}$ .

### (2-methoxyphenyl)(2-methylallyl)sulfane (2m)

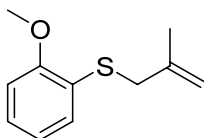

Purified by flash column chromatography (petroleum ether/ethyl acetate, 80/1) to afford **2m** (53.1mg, 91%) as pale yellow oil.  $^1\text{H}$  NMR (400 MHz,  $\text{CDCl}_3$ )  $\delta$  7.30 – 7.26 (m, 1H), 7.23 – 7.15 (m, 1H), 6.93 – 6.82 (m, 2H), 4.79 (d,  $J = 8.9$  Hz, 2H), 3.89 (s, 3H), 3.51 (s, 2H), 1.85 (s, 3H);  $^{13}\text{C}$  NMR (101 MHz,  $\text{CDCl}_3$ )  $\delta$  157.75, 140.95, 130.87, 127.56, 124.22, 120.89, 113.75, 110.46, 55.74, 40.11, 21.29; IR (film)  $\nu$ : 2954, 2924, 2854, 1579, 1471, 1244, 1026, 894, 748  $\text{cm}^{-1}$ ; IR (film)  $\nu$ : 2954, 2924, 2854, 1579, 1471, 1244, 1026, 894, 748  $\text{cm}^{-1}$ .

### (4-bromophenyl)(2-methylallyl)sulfane (2n)

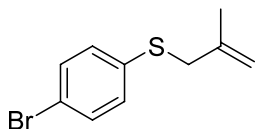

Purified by flash column chromatography (petroleum ether) to afford **2n** (68.6mg, 94%) as pale yellow oil.  $^1\text{H NMR}$  (400 MHz,  $\text{CDCl}_3$ )  $\delta$  7.38 (d,  $J = 8.4$  Hz, 2H), 7.19 (d,  $J = 8.4$  Hz, 2H), 4.81 (d,  $J = 5.2$  Hz, 2H), 3.49 (s, 2H), 1.84 (s, 3H);  $^{13}\text{C NMR}$  (101 MHz,  $\text{CDCl}_3$ )  $\delta$  204.12, 140.39, 135.57, 131.78, 131.63, 120.16, 114.34, 41.99, 21.07. IR (film)  $\nu$ : 3078, 2972, 2918, 1647, 1566, 1471, 1091, 1006, 898, 810, 771; IR (film)  $\nu$ : 2972, 2918, 1647, 1566, 1471, 1091, 1006, 898, 810  $\text{cm}^{-1}$ .

**cinnamyl(p-tolyl)sulfane (2o)**

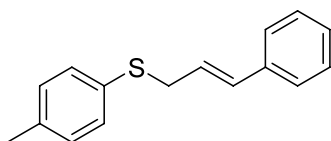

Purified by flash column chromatography (petroleum ether) to afford **2o** (67.1mg, 93%) as pale yellow oil.  $^1\text{H NMR}$  (400 MHz,  $\text{CDCl}_3$ )  $\delta$  7.33 – 7.17 (m, 7H), 7.08 (d,  $J = 7.8$  Hz, 2H), 6.38 (d,  $J = 15.7$  Hz, 1H), 6.29 – 6.17 (m, 1H), 3.65 (d,  $J = 7.0$  Hz, 2H), 2.30 (s, 3H);  $^{13}\text{C NMR}$  (101 MHz,  $\text{CDCl}_3$ )  $\delta$  136.87, 136.67, 132.60, 131.96, 131.16, 129.66, 128.53, 127.53, 126.36, 125.41, 37.88, 21.07; IR (film)  $\nu$ : 3026, 2922, 1701, 1678, 1490, 1450, 1122, 966, 806, 750, 696  $\text{cm}^{-1}$ .

**(4-bromophenyl)(cinnamyl)sulfane (2p)**

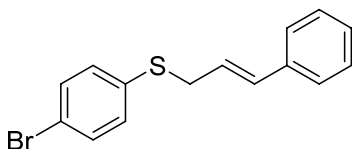

Purified by flash column chromatography (petroleum ether) to afford **2p** (78.4mg, 89%) as white solid.  $^1\text{H NMR}$  (400 MHz,  $\text{CDCl}_3$ )  $\delta$  7.741 – 7.36 (m, 2H), 7.34 – 7.28 (m, 4H), 7.26 – 7.20 (m, 3H), 6.42 (d,  $J = 15.7$  Hz, 1H), 6.27 – 6.16 (m, 1H), 3.68 (d,  $J = 7.1$  Hz, 2H);  $^{13}\text{C NMR}$  (101 MHz,  $\text{CDCl}_3$ )  $\delta$  136.55, 135.02, 133.13, 131.90, 131.86, 128.59, 127.73, 126.37, 124.62, 120.41, 37.20; IR (film)  $\nu$ : 2920, 1468, 1383, 1213, 1088, 970, 808  $\text{cm}^{-1}$ .

**(4-chlorophenyl)(cinnamyl)sulfane (2q)**

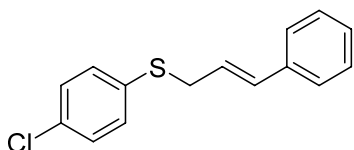

Purified by flash column chromatography (petroleum ether) to afford **2q** (68.9 mg, 87%) as white solid.  $^1\text{H NMR}$  (400 MHz,  $\text{CDCl}_3$ )  $\delta$  7.35 – 7.17 (m, 9H), 6.40 (d,  $J = 15.7$  Hz, 1H), 6.28 – 6.14 (m, 1H), 3.67 (d,  $J = 7.0$  Hz, 2H);  $^{13}\text{C NMR}$  (101 MHz,  $\text{CDCl}_3$ )  $\delta$  136.57, 134.27, 133.08, 132.56, 131.80, 128.99, 128.58, 127.72, 126.36, 124.69, 37.43; **IR** (film)  $\nu$ : 2922, 1475, 1389, 1221, 1097, 968, 810, 756  $\text{cm}^{-1}$ .

**(2-bromophenyl)(but-3-en-2-yl)sulfane (2r-1)**

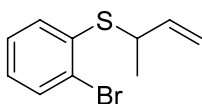

Purified by flash column chromatography (petroleum ether) to afford **2r-1** (32.5mg, 45%) as pale yellow oil.  $^1\text{H NMR}$  (400 MHz,  $\text{CDCl}_3$ )  $\delta$  7.45 – 7.35 (m, 1H), 7.31 – 7.17 (m, 3H), 5.89 – 5.75 (m, 1H), 5.08 – 4.93 (m, 2H), 3.91 (p,  $J = 7.0$  Hz, 1H), 1.44 (d,  $J = 6.9$  Hz, 3H);  $^{13}\text{C NMR}$  (101 MHz,  $\text{CDCl}_3$ )  $\delta$  139.32, 132.89, 129.97, 128.54, 127.58, 126.56, 124.98, 115.31, 35.43, 17.79; **IR** (film)  $\nu$ : 2920, 2852, 1573, 1446, 1220, 1020, 962, 744  $\text{cm}^{-1}$ .

**(2-bromophenyl)(but-2-en-1-yl)sulfane (2r-2)**

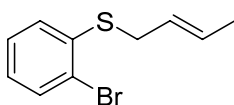

Purified by flash column chromatography (petroleum ether) to afford **2r-2** (32.8 mg, 45%) as pale yellow oil.  $^1\text{H NMR}$  (400 MHz,  $\text{CDCl}_3$ )  $\delta$  7.59 – 7.51 (m, 2H), 7.10 – 6.97 (m, 2H), 5.73 – 5.61 (m, 1H), 5.59 – 5.48 (m, 1H), 3.62 – 3.51 (m, 2H), 1.66 (d,  $J = 6.3$  Hz, 3H);  $^{13}\text{C NMR}$  (101 MHz,  $\text{CDCl}_3$ )  $\delta$  138.01, 136.50, 133.08, 132.60, 127.86, 127.50, 123.59, 115.31, 45.39, 20.03; **IR** (film)  $\nu$ : 2920, 2852, 1573, 1446, 1220, 1020, 962, 744  $\text{cm}^{-1}$ .

**but-3-en-2-yl(4-chlorophenyl)sulfane (2s-1)**



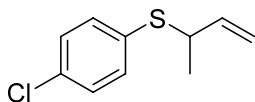

Purified by flash column chromatography (petroleum ether) to afford **2s-1** (27.1mg, 45.5%) as pale yellow oil. **<sup>1</sup>H NMR** (400 MHz, CDCl<sub>3</sub>) δ 7.25 – 7.23 (m, 4H), 5.85 – 5.70 (m, 1H), 4.95 – 4.88 (m, 2H), 3.74 – 3.67 (m, 1H), 1.38 (d, *J* = 6.9 Hz, 3H); **<sup>13</sup>C NMR** (101 MHz, CDCl<sub>3</sub>) δ 134.16, 131.13, 129.37, 128.84, 128.83, 114.95, 46.71, 20.04; **IR** (film) *v*: 2966, 2992, 1475, 1386, 1220, 1095, 962, 920, 815 cm<sup>-1</sup>.

**(E)-but-2-en-1-yl(4-chlorophenyl)sulfane (2s-2)**

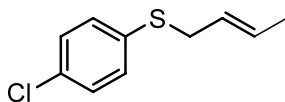

Purified by flash column chromatography (petroleum ether) to afford **2s-2** (27.1mg, 45.5%) as pale yellow oil. **<sup>1</sup>H NMR** (400 MHz, CDCl<sub>3</sub>) δ 7.32 (d, *J* = 8.5 Hz, 2H), 7.25 (d, *J* = 8.5 Hz, 2H), 5.64 – 5.42 (m, 2H), 3.56 – 3.42 (m, 2H), 1.65 (d, *J* = 5.4 Hz, 3H); **<sup>13</sup>C NMR** (101 MHz, CDCl<sub>3</sub>) δ 139.60, 134.16, 131.13, 128.83, 125.81, 114.95, 36.67, 17.72; **IR** (film) *v*: 2966, 2992, 1475, 1386, 1220, 1095, 962, 920, 815 cm<sup>-1</sup>.

- 
1. Breen G F. Enzymatic resolution of a secondary amine using novel acylating reagents[J]. Tetrahedron A symmetry, 2004, 15(9):1427-1430.
  2. Kim D, Reddy S, Singh O V, et al. Ir(I) - Catalyzed Enantioselective Decarboxylative Allylic Etherification: A General Method for the Asymmetric Synthesis of Aryl Allyl Ethers[J]. Organic Letters, 2013, 15 (3):512-515.

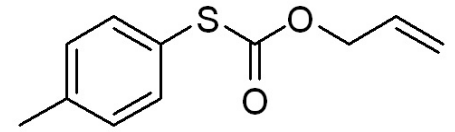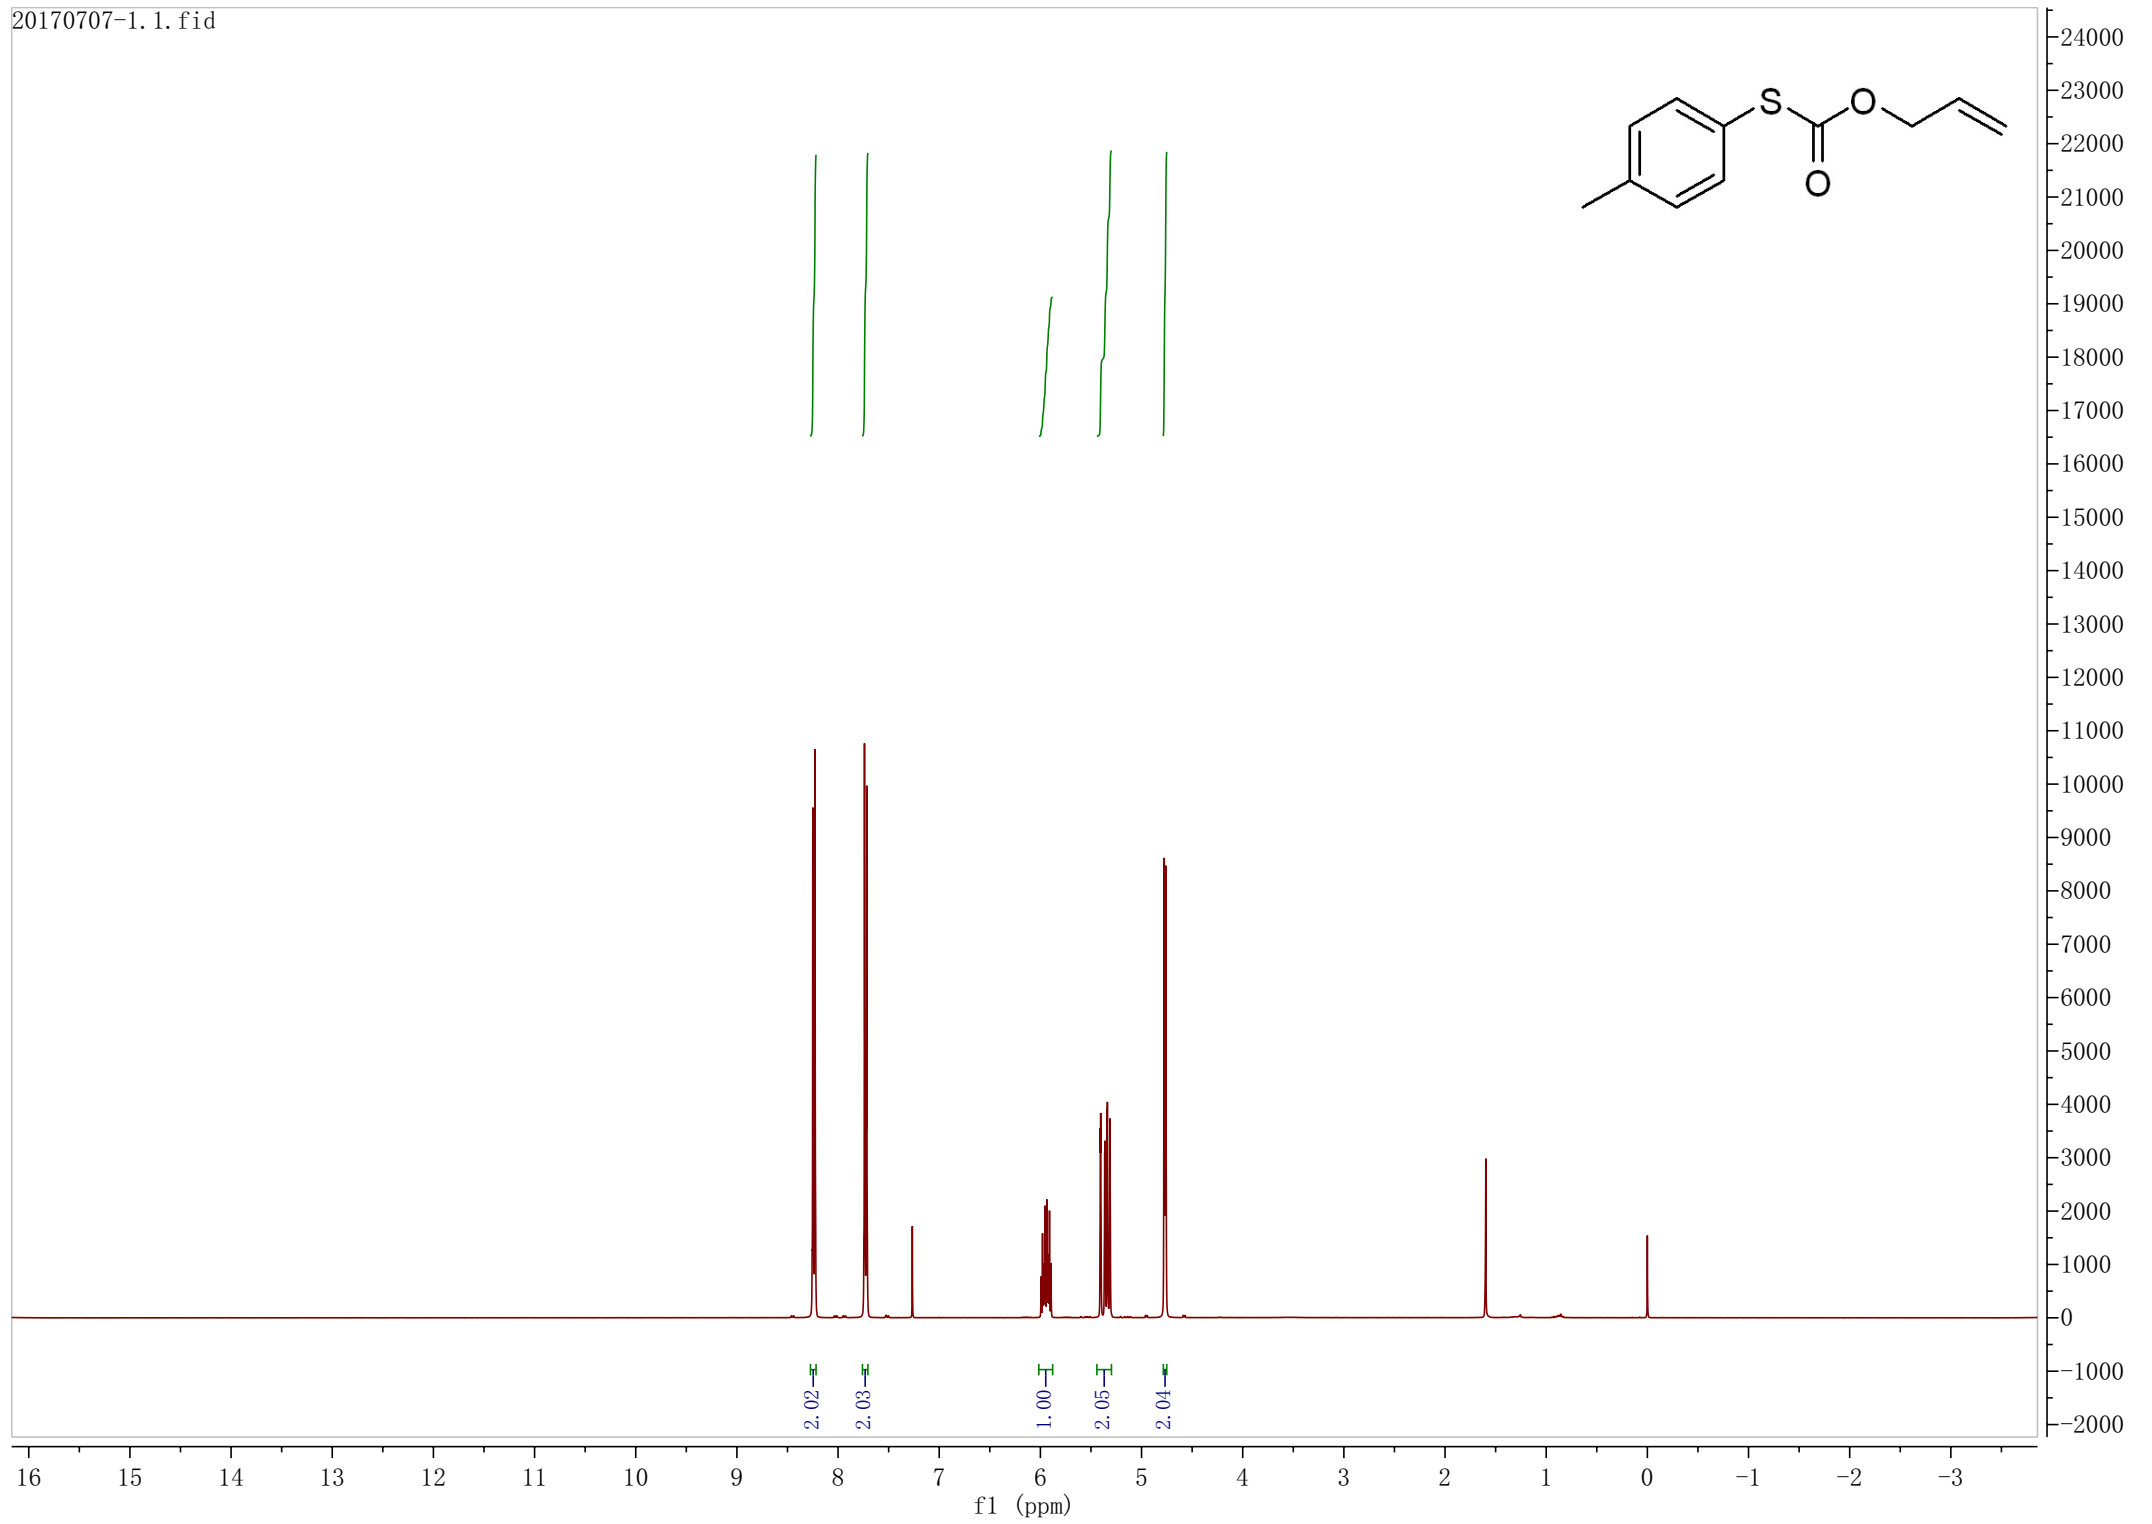

20170705-3

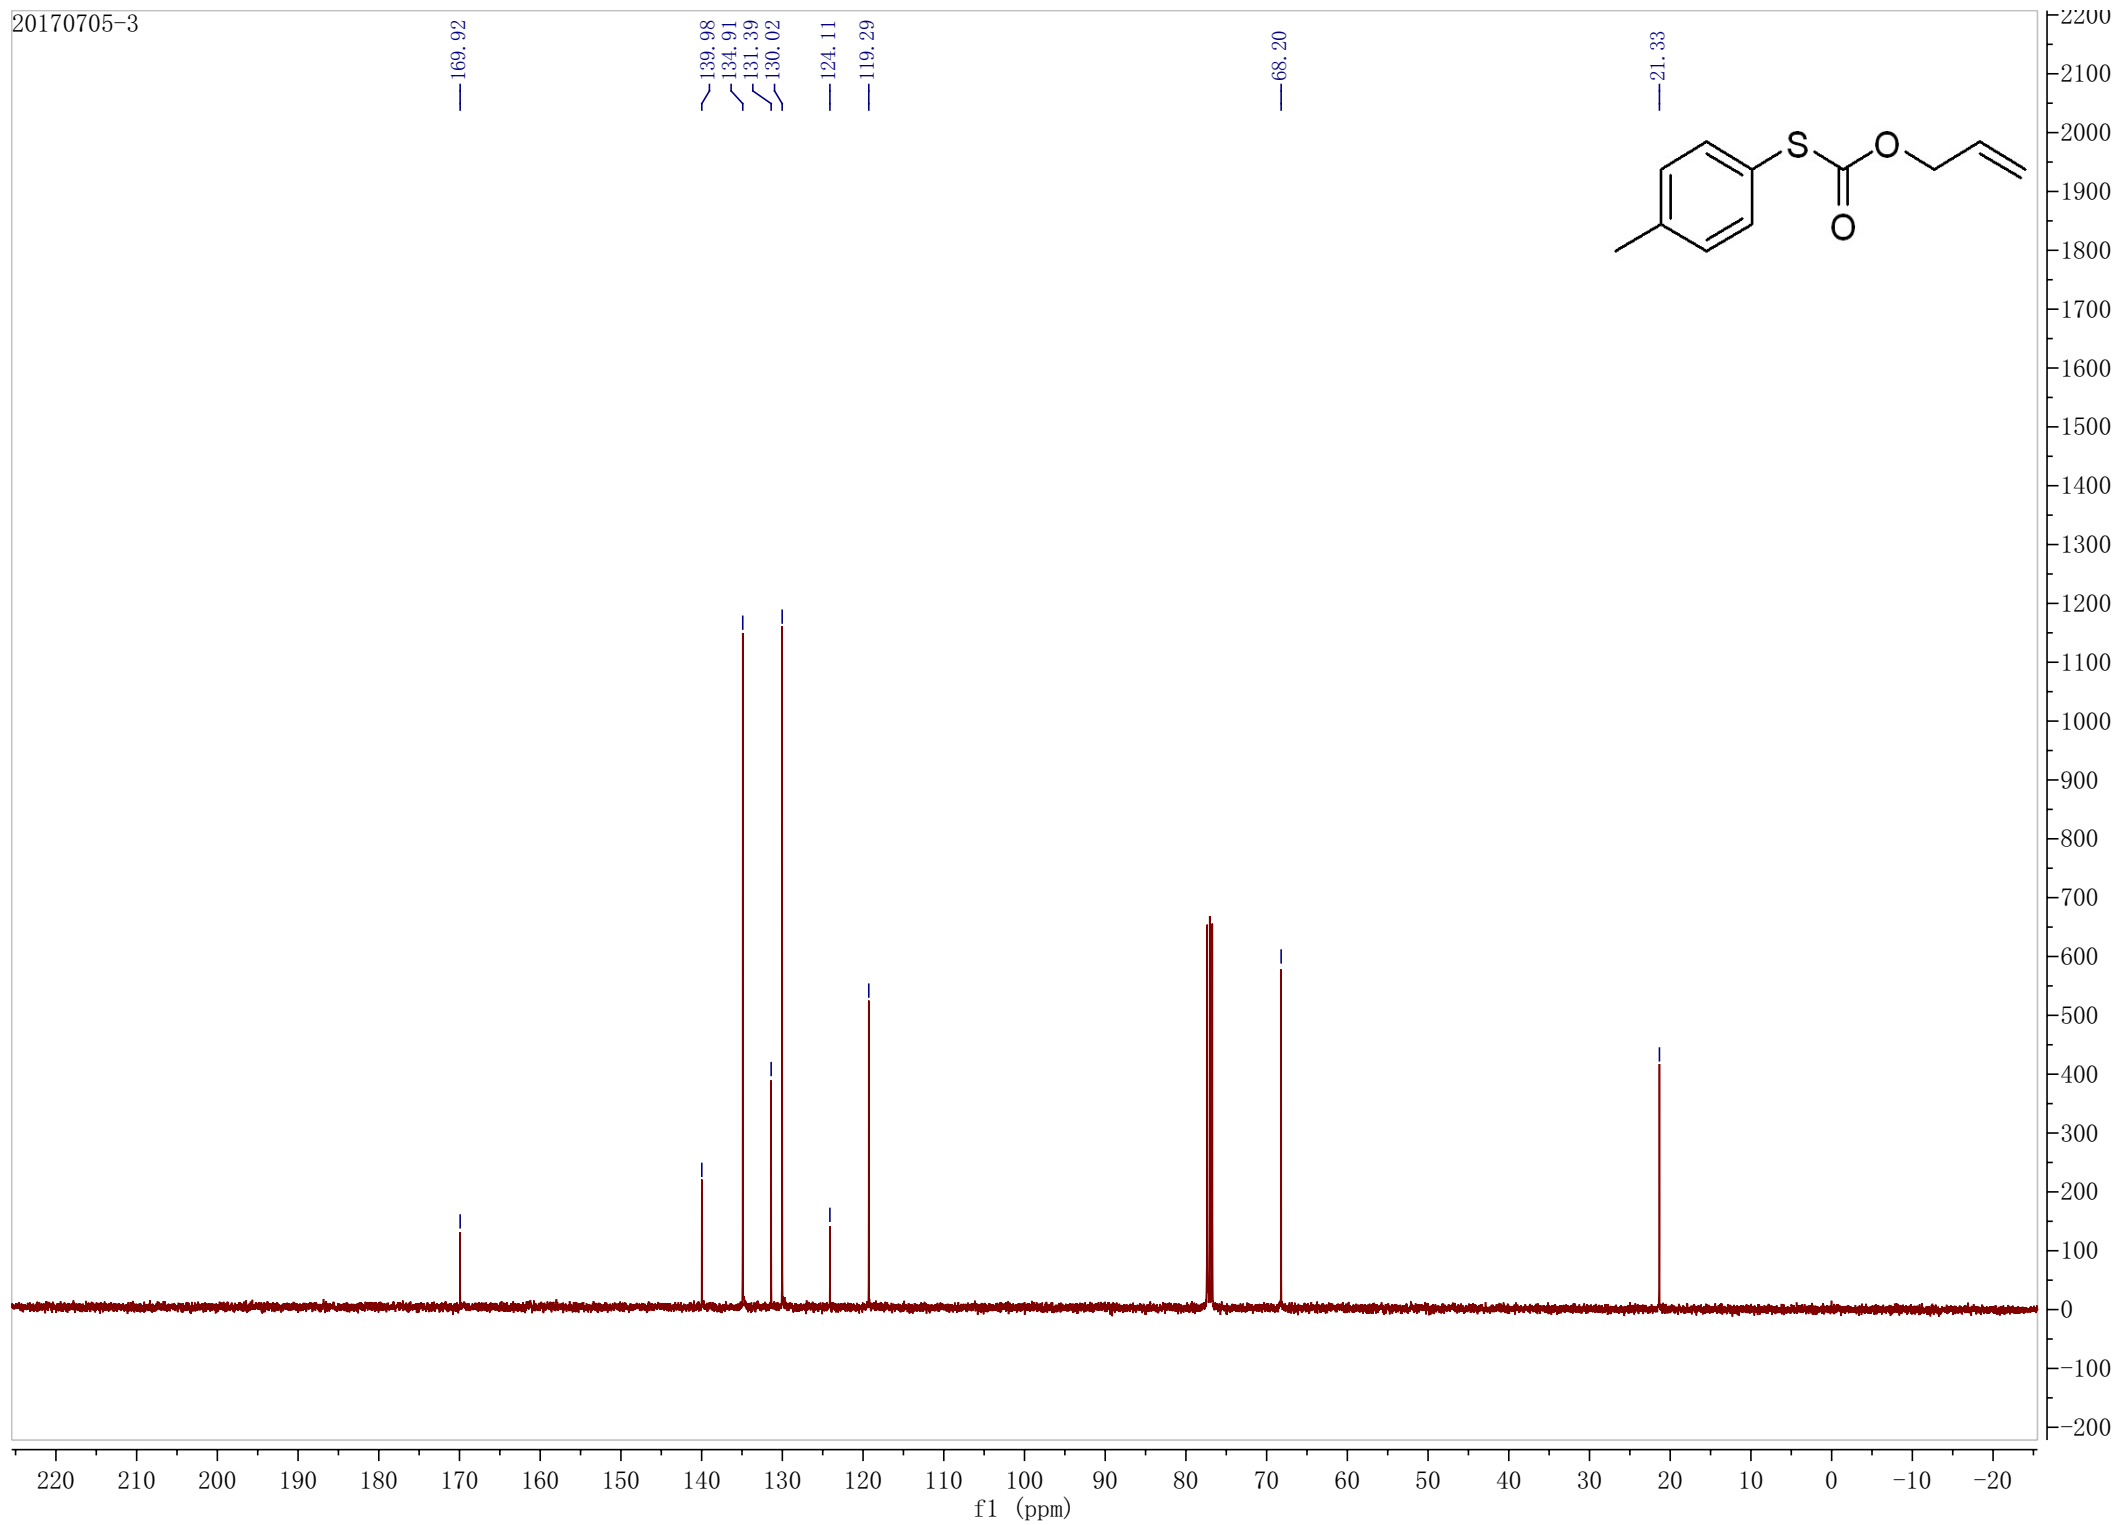

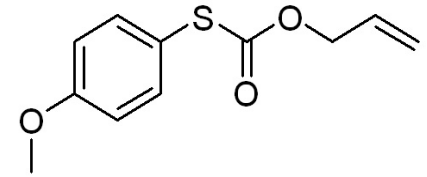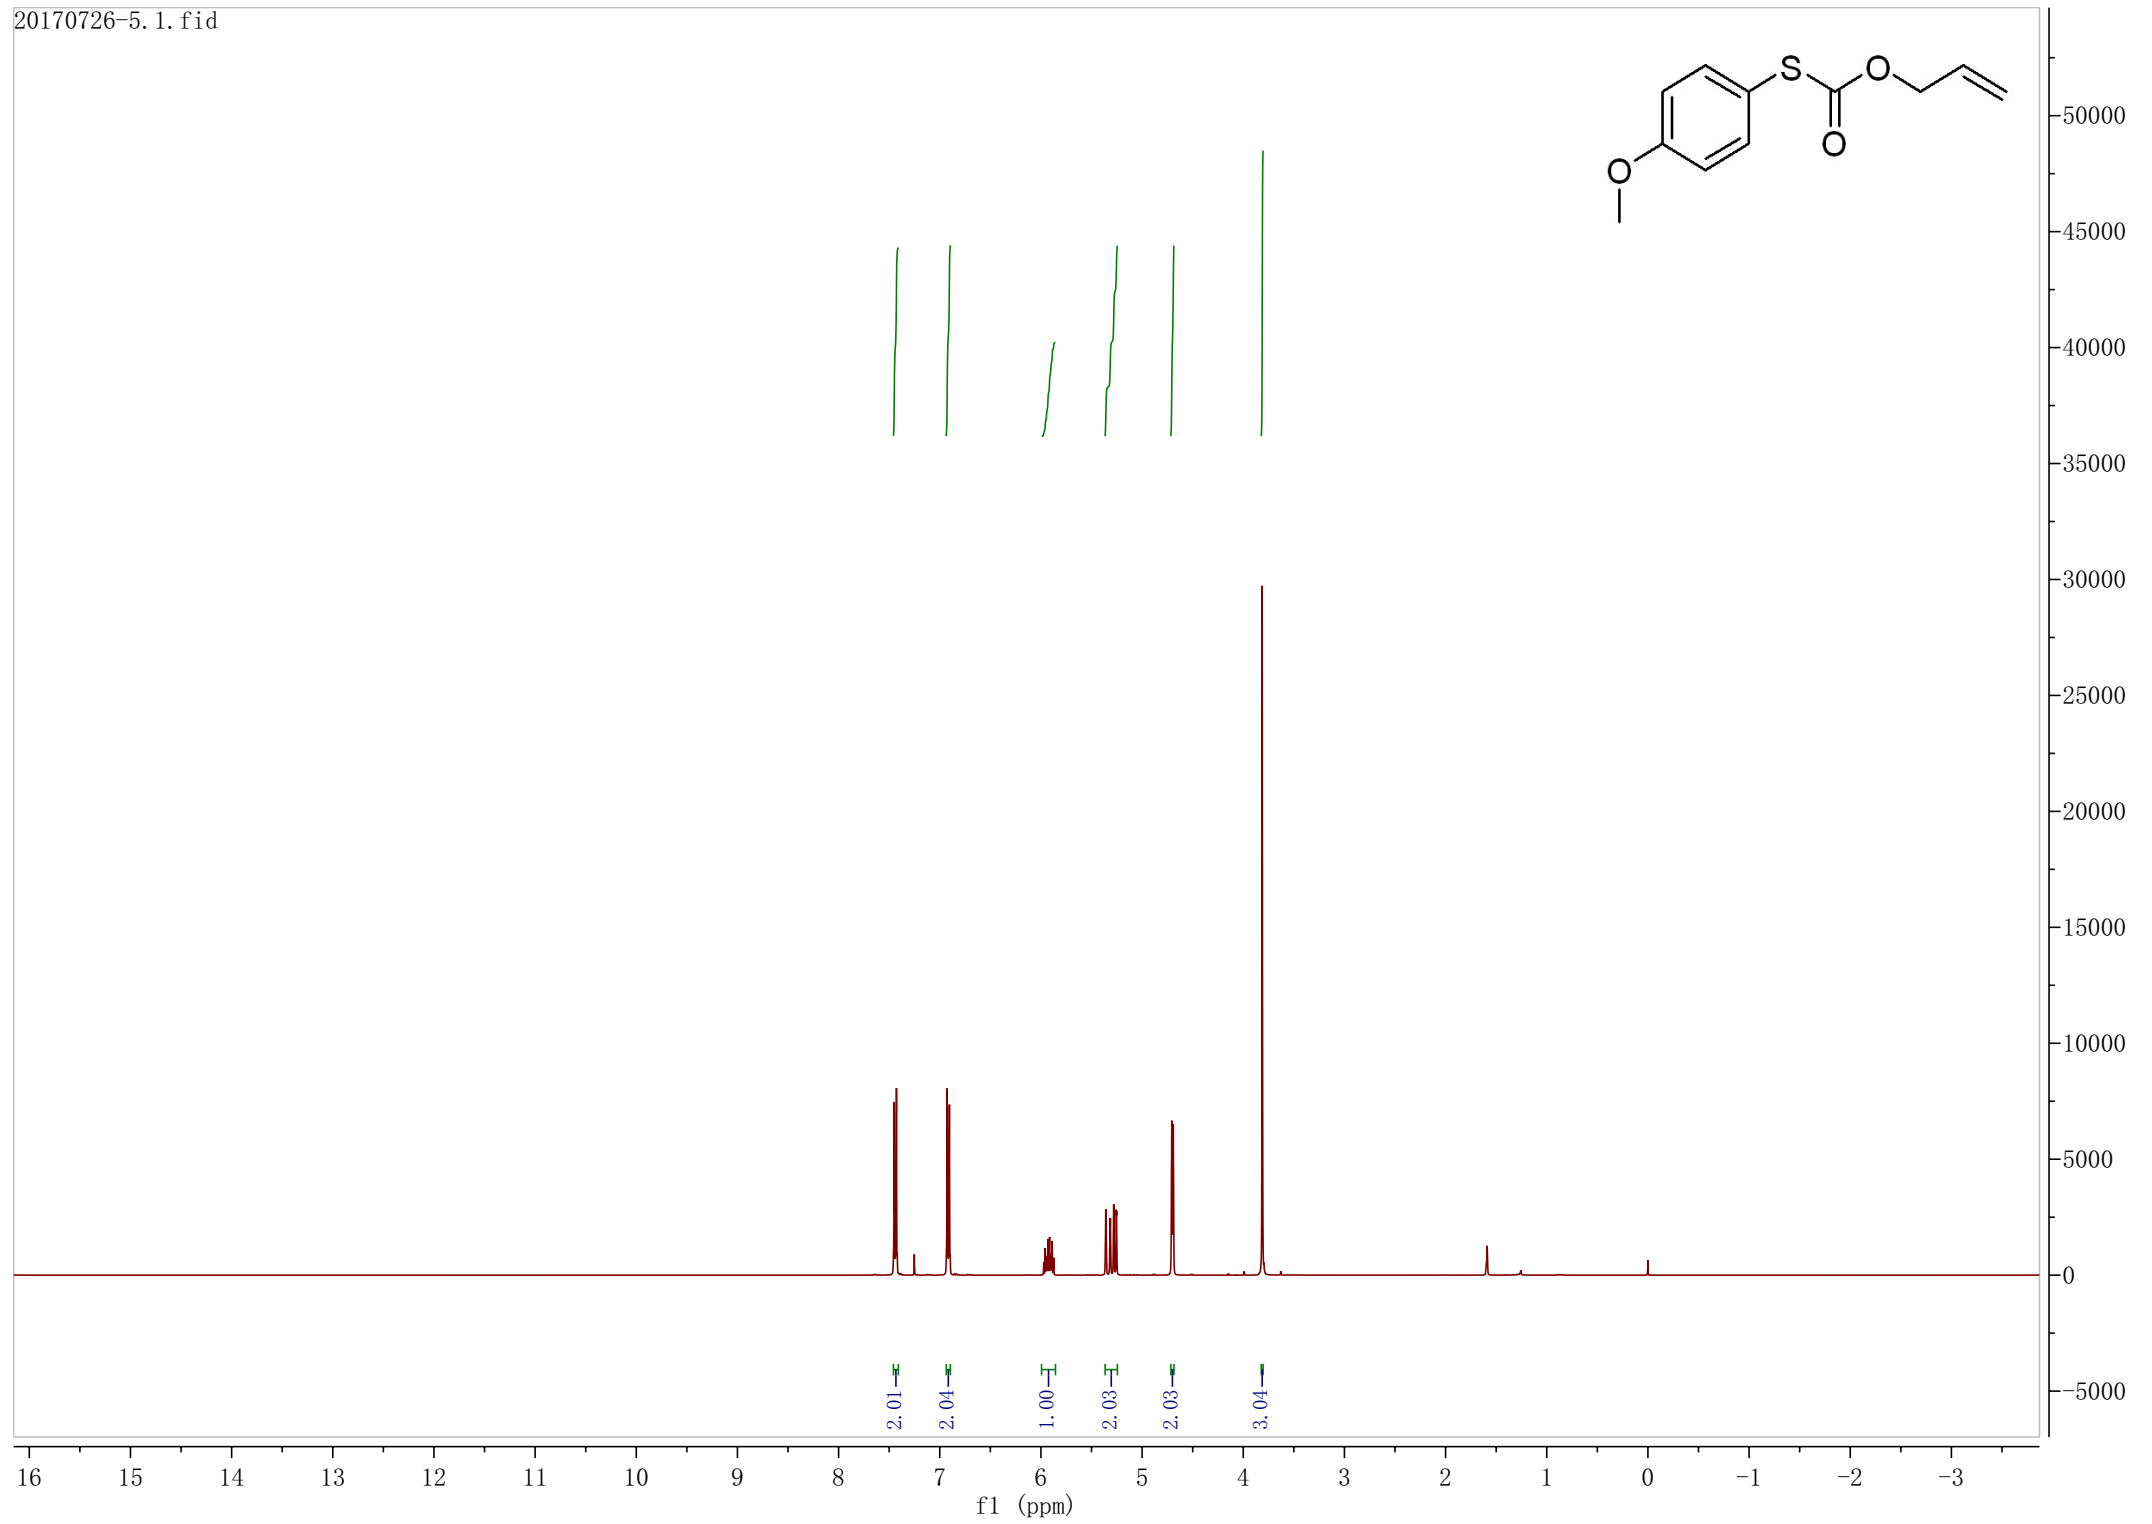

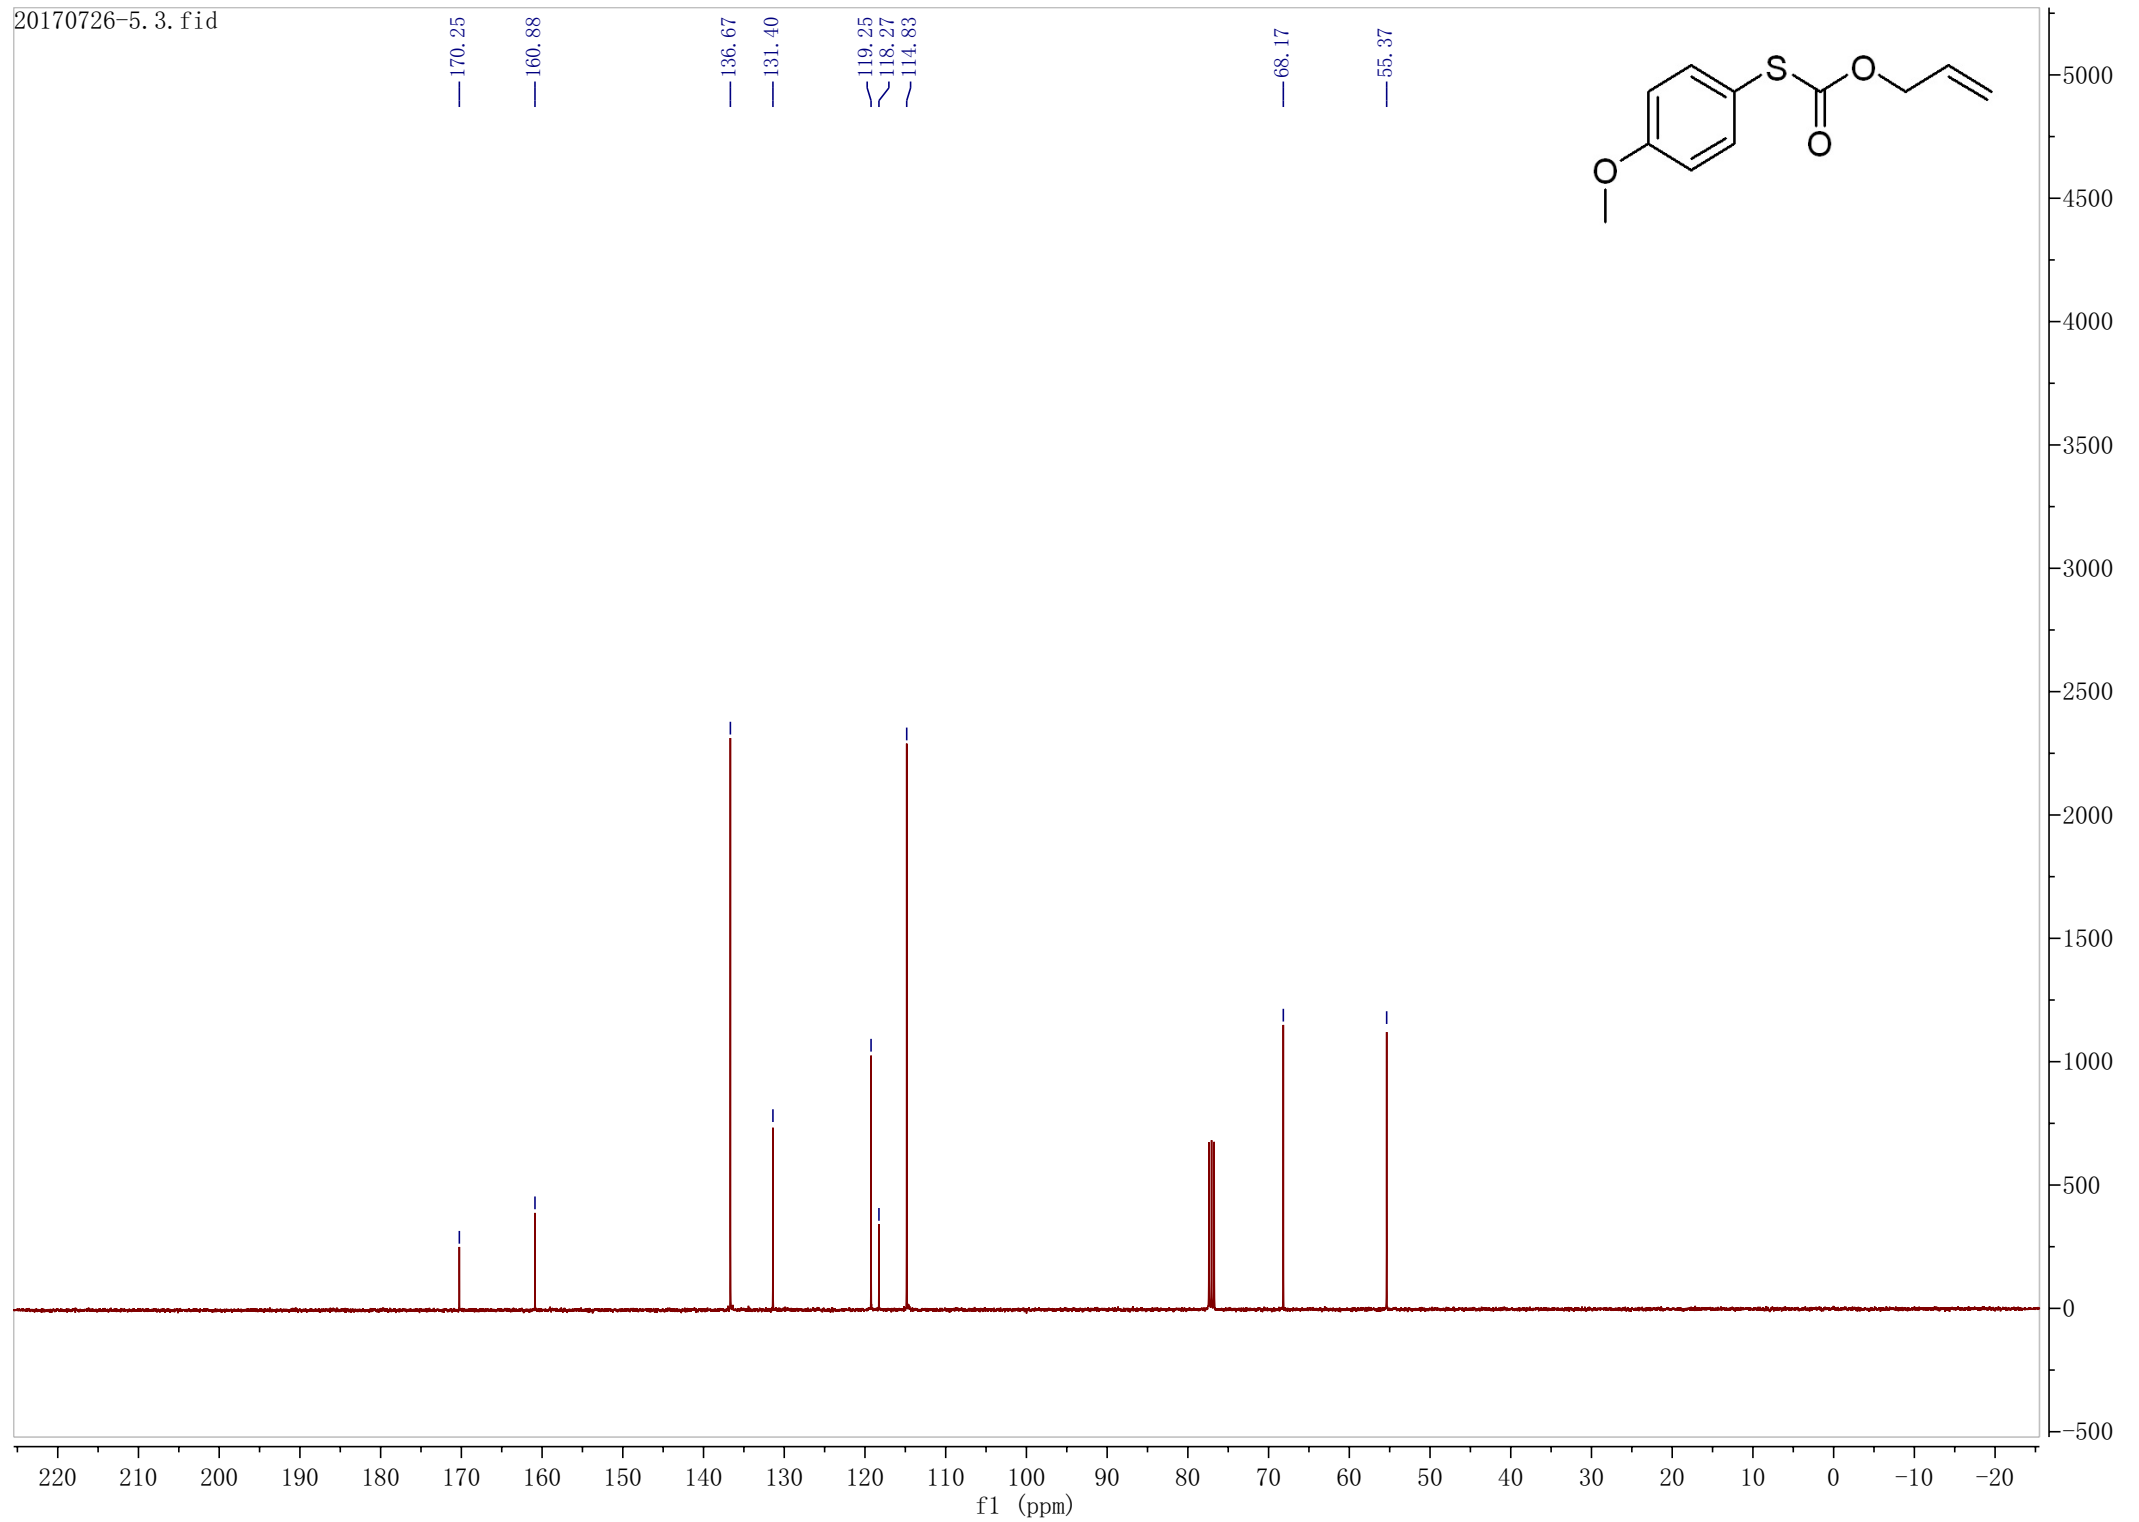

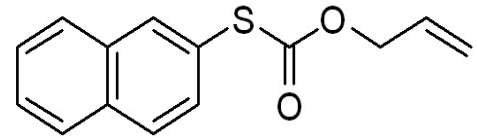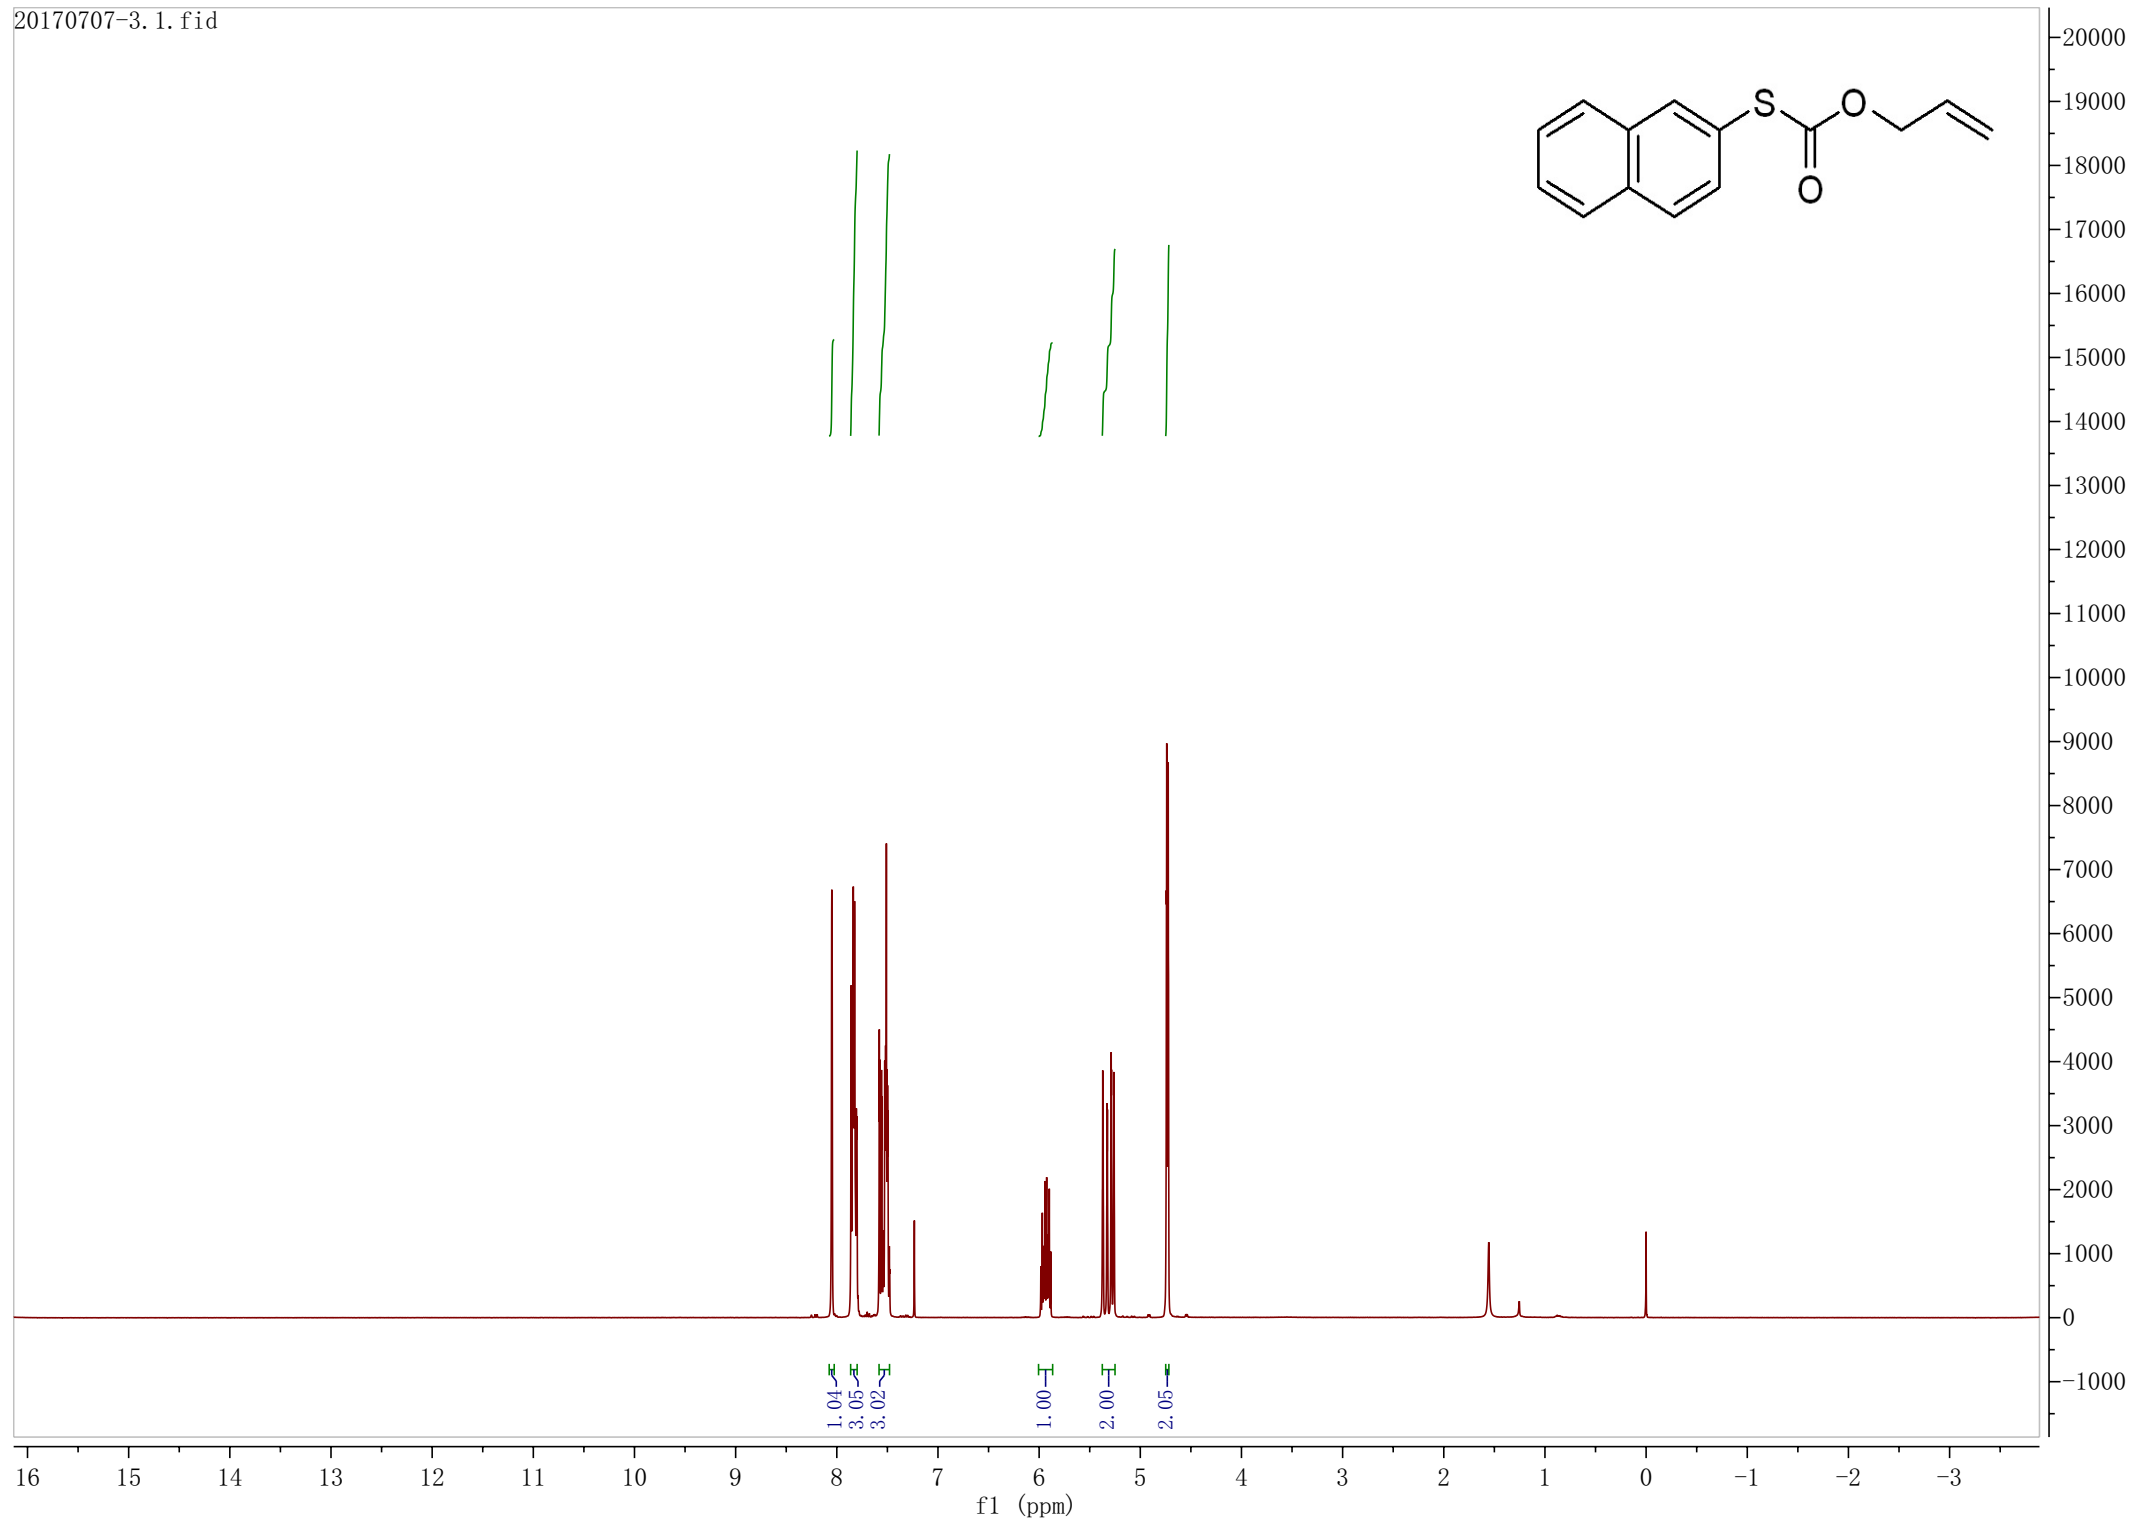

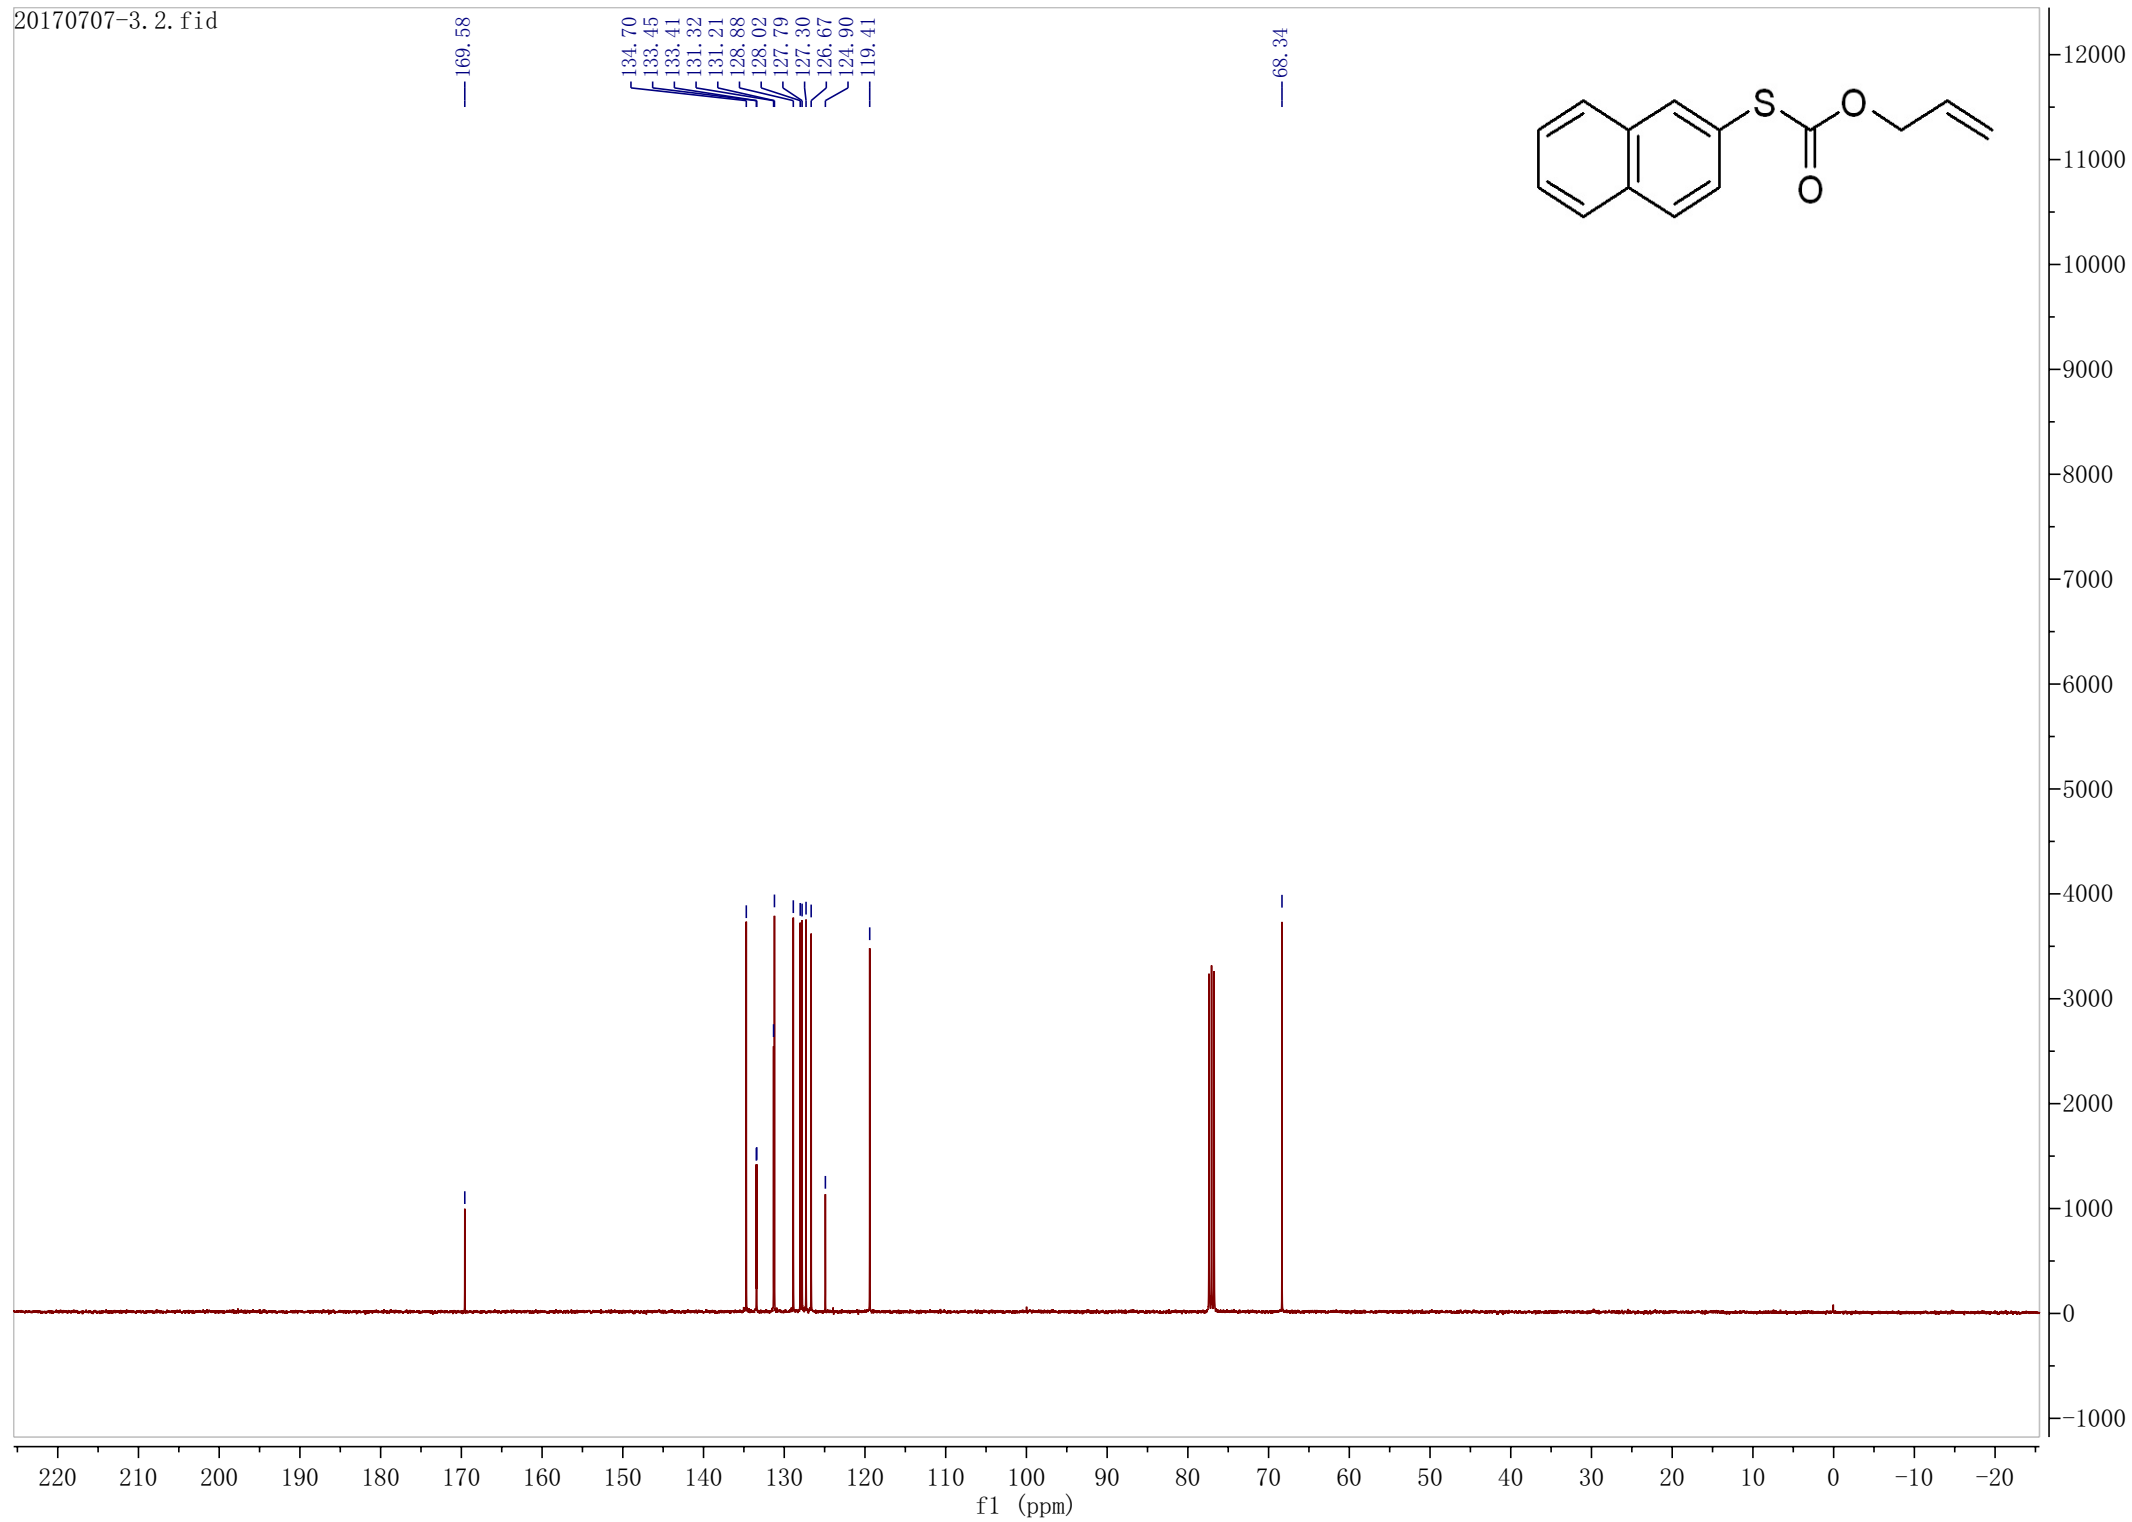

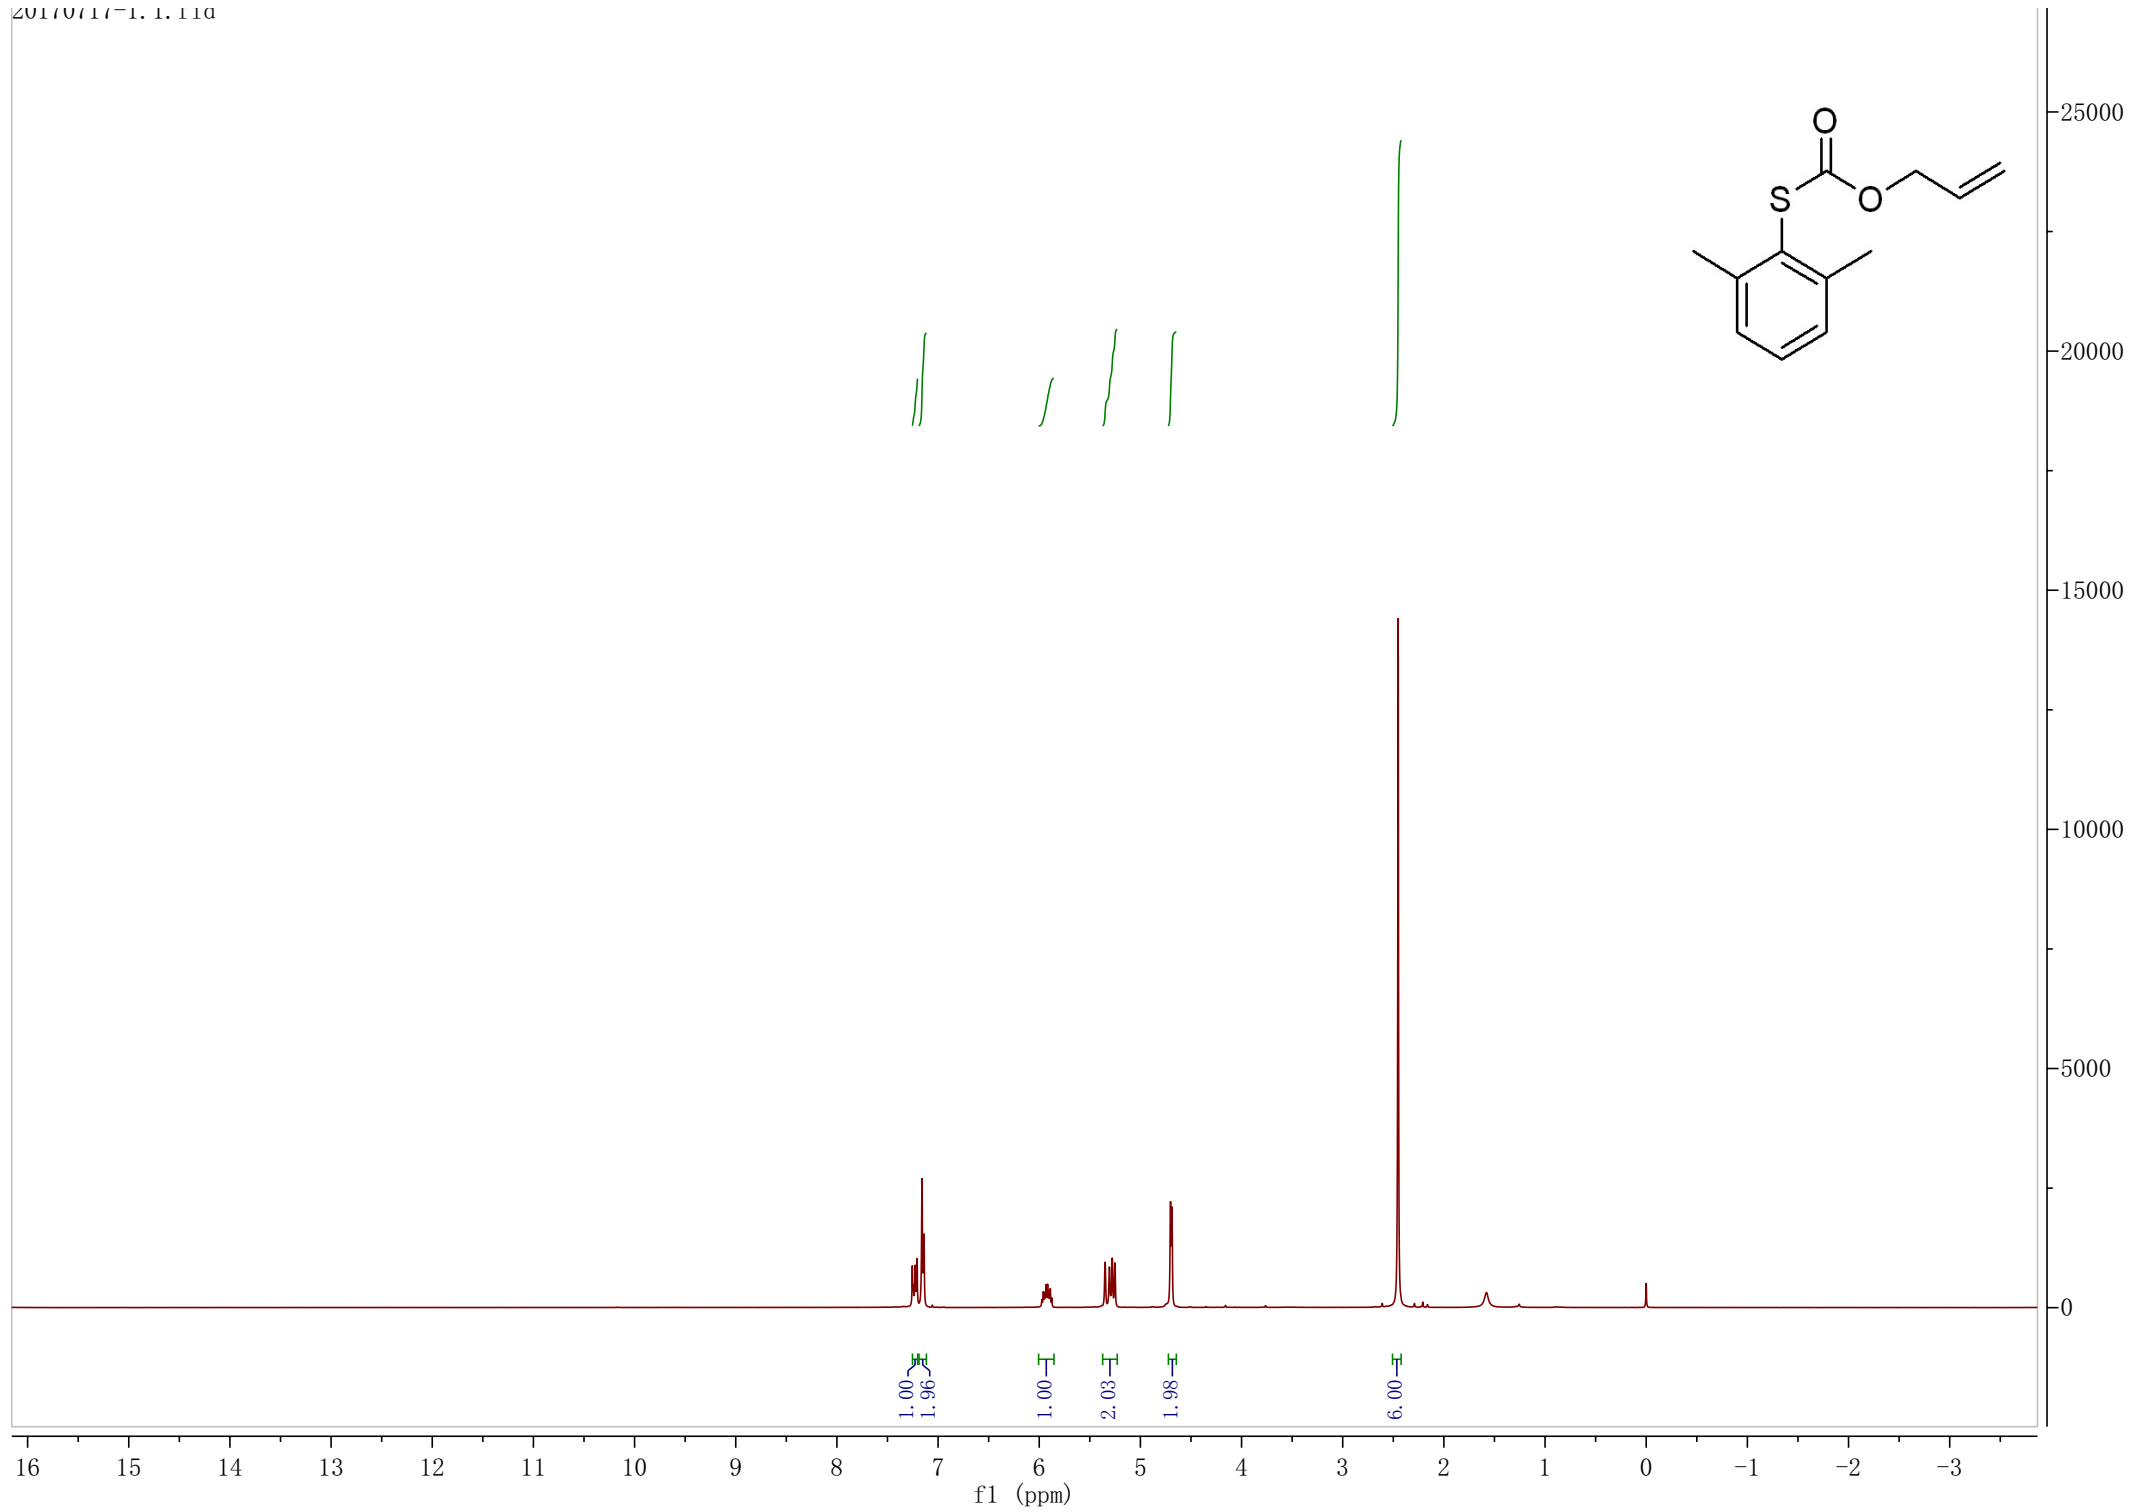



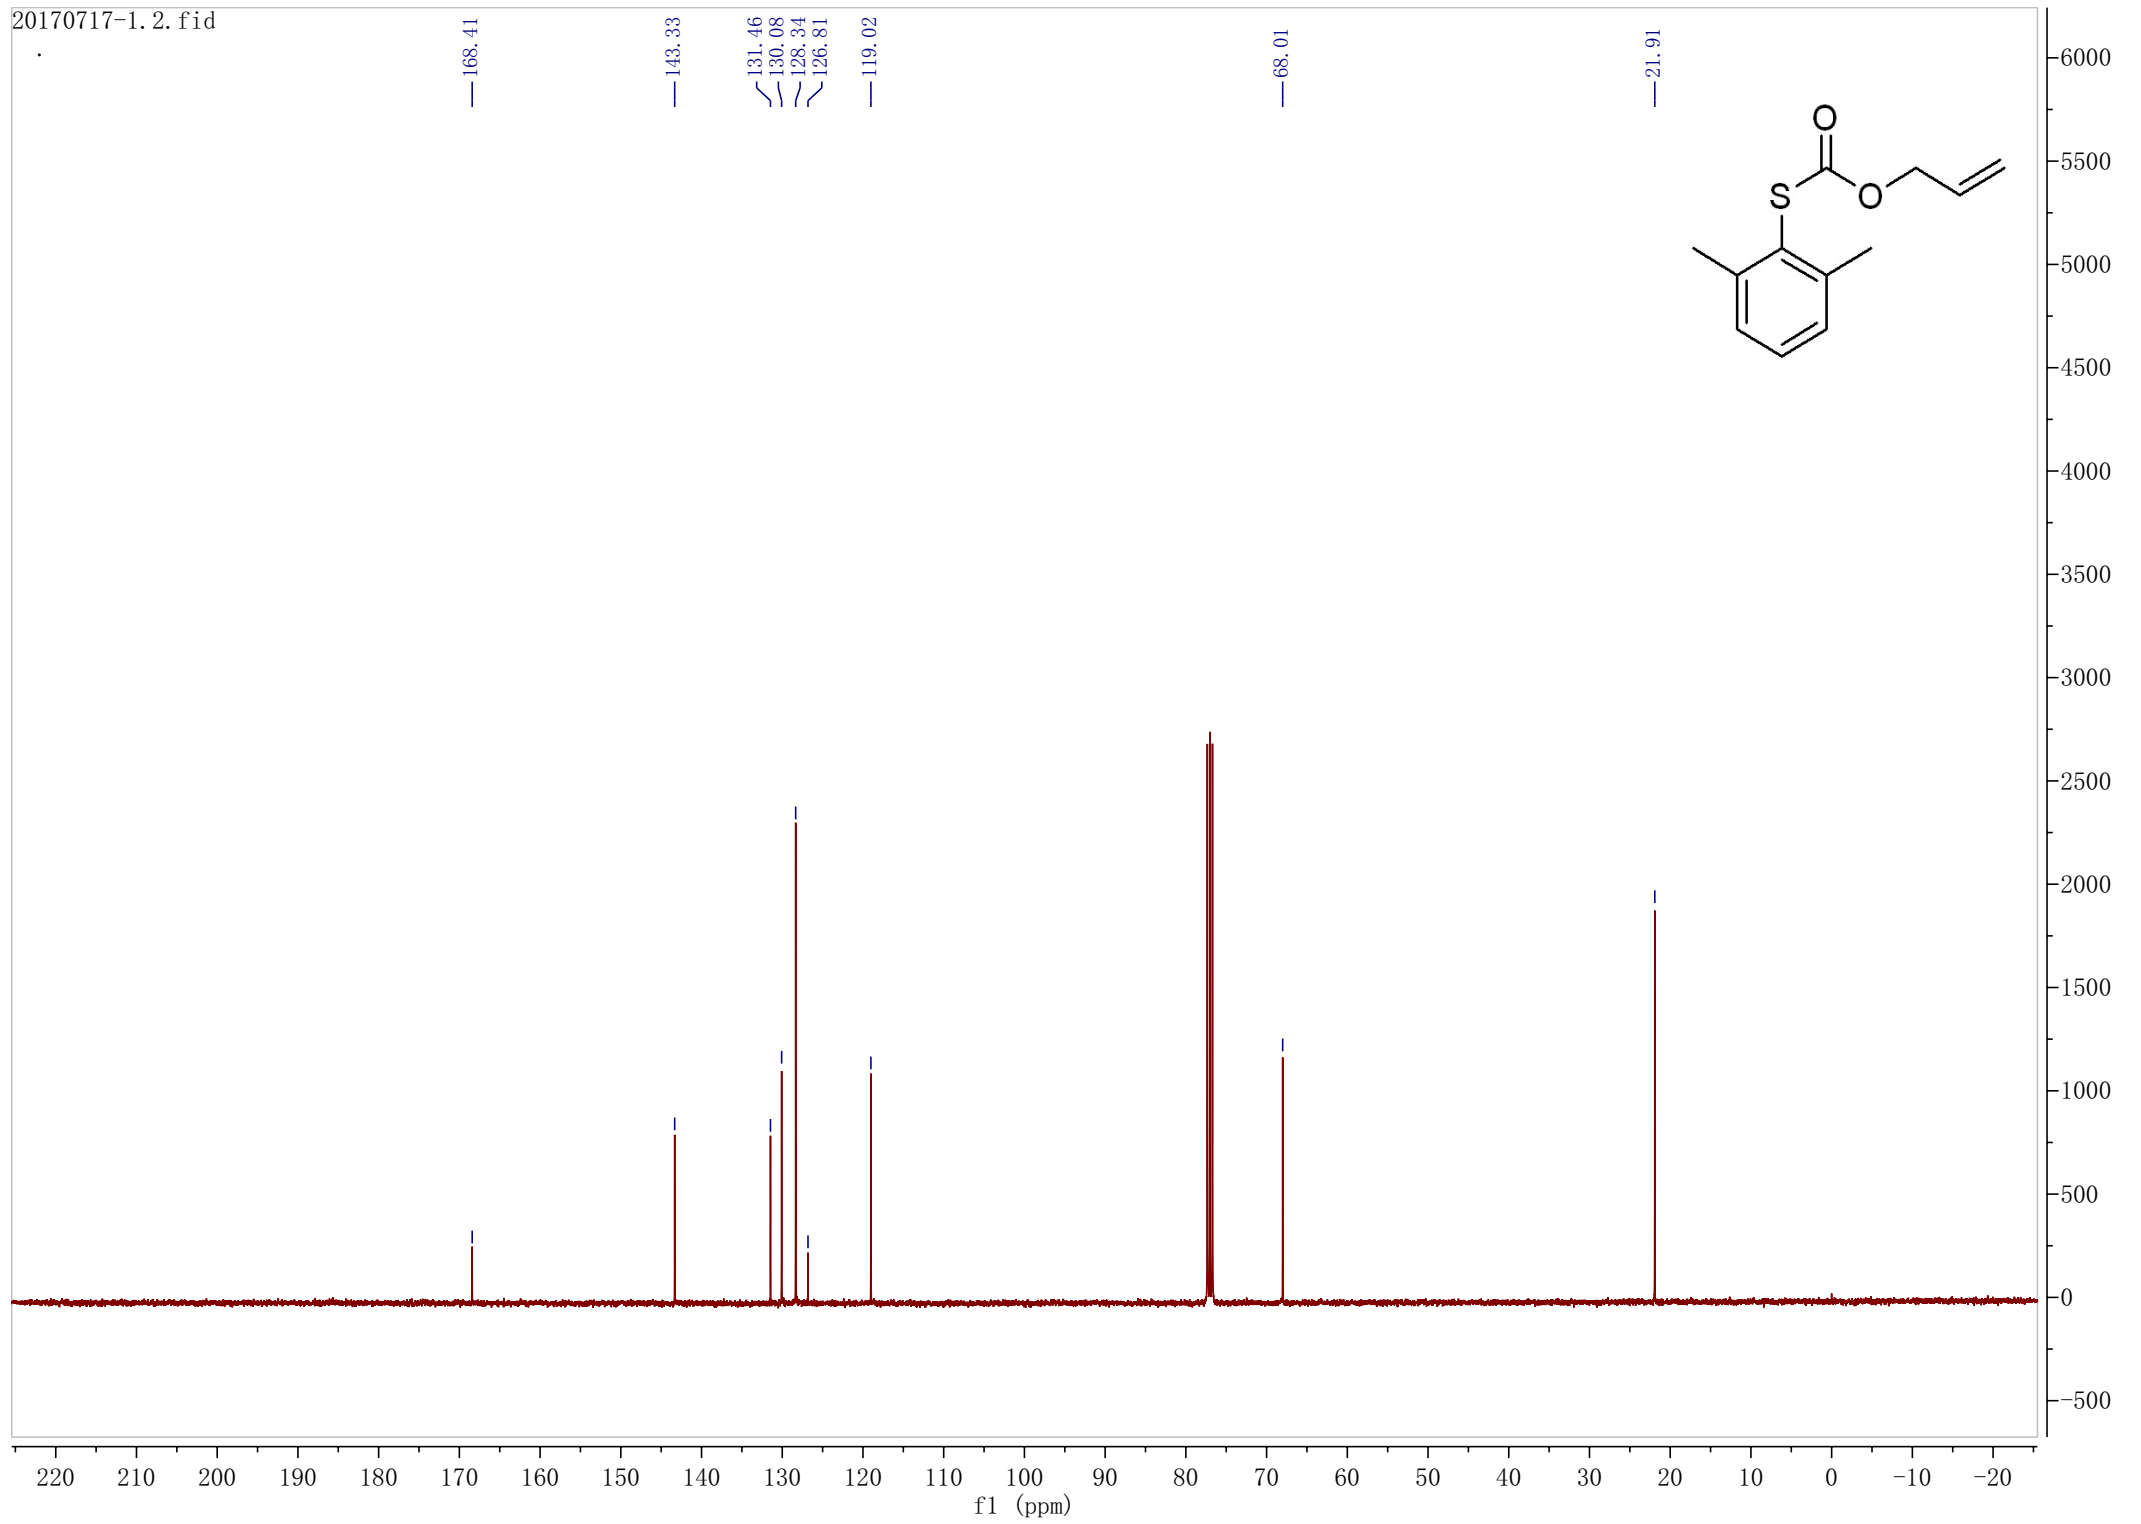

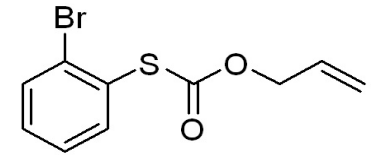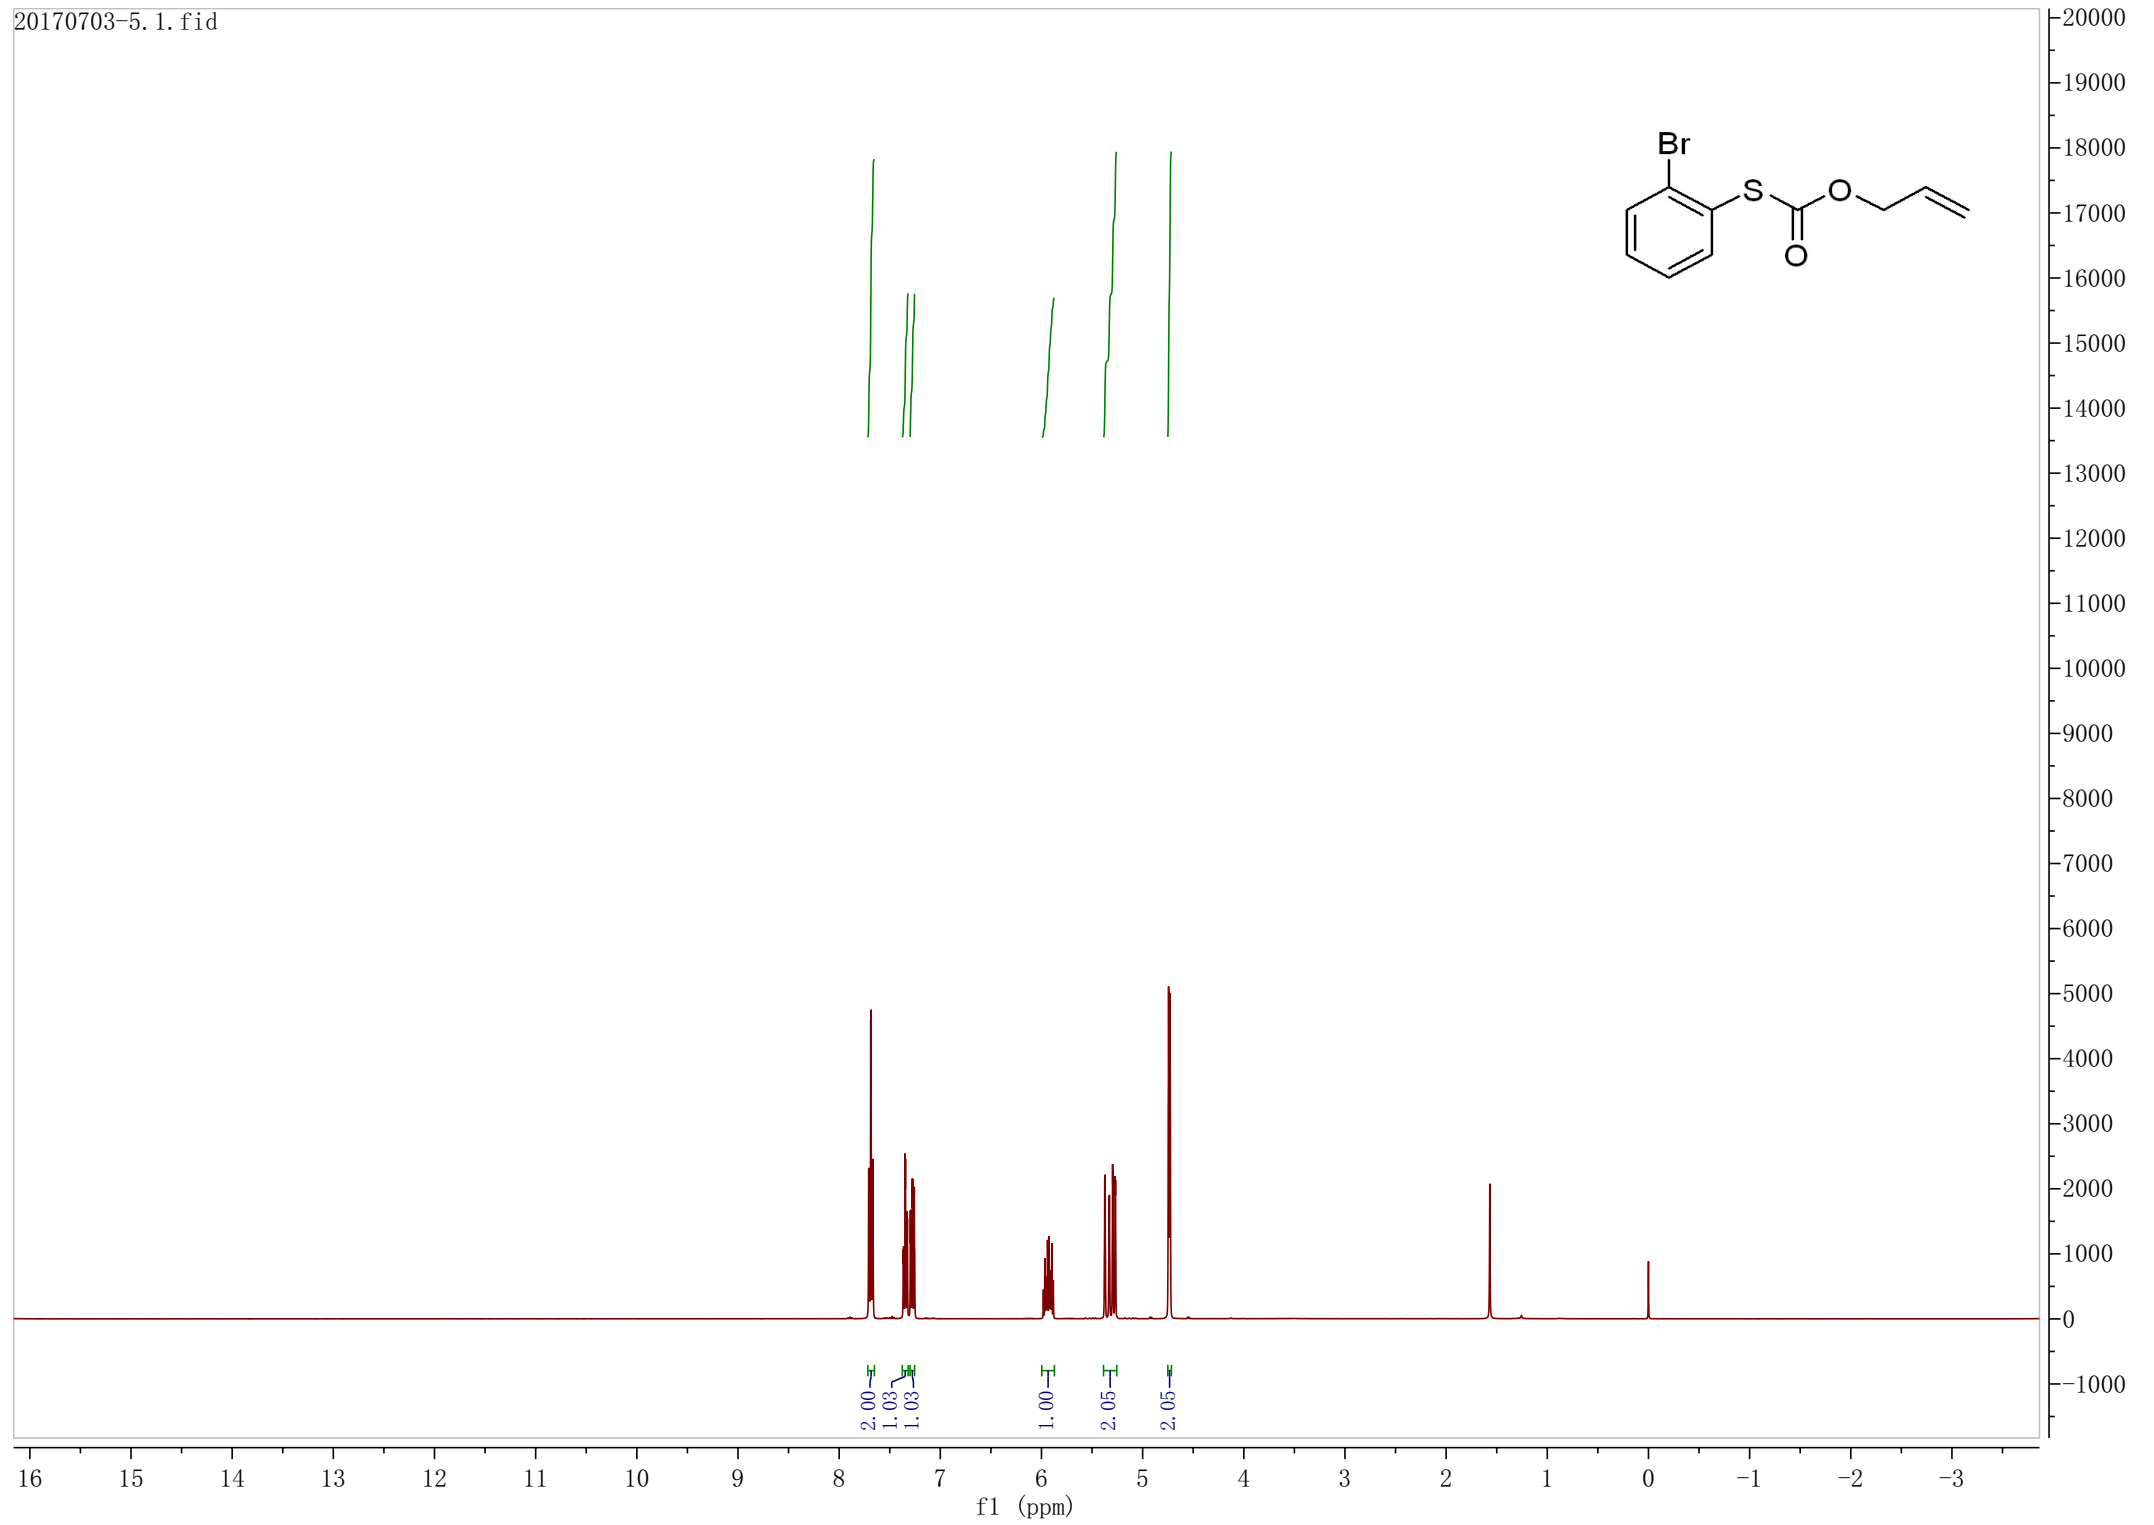

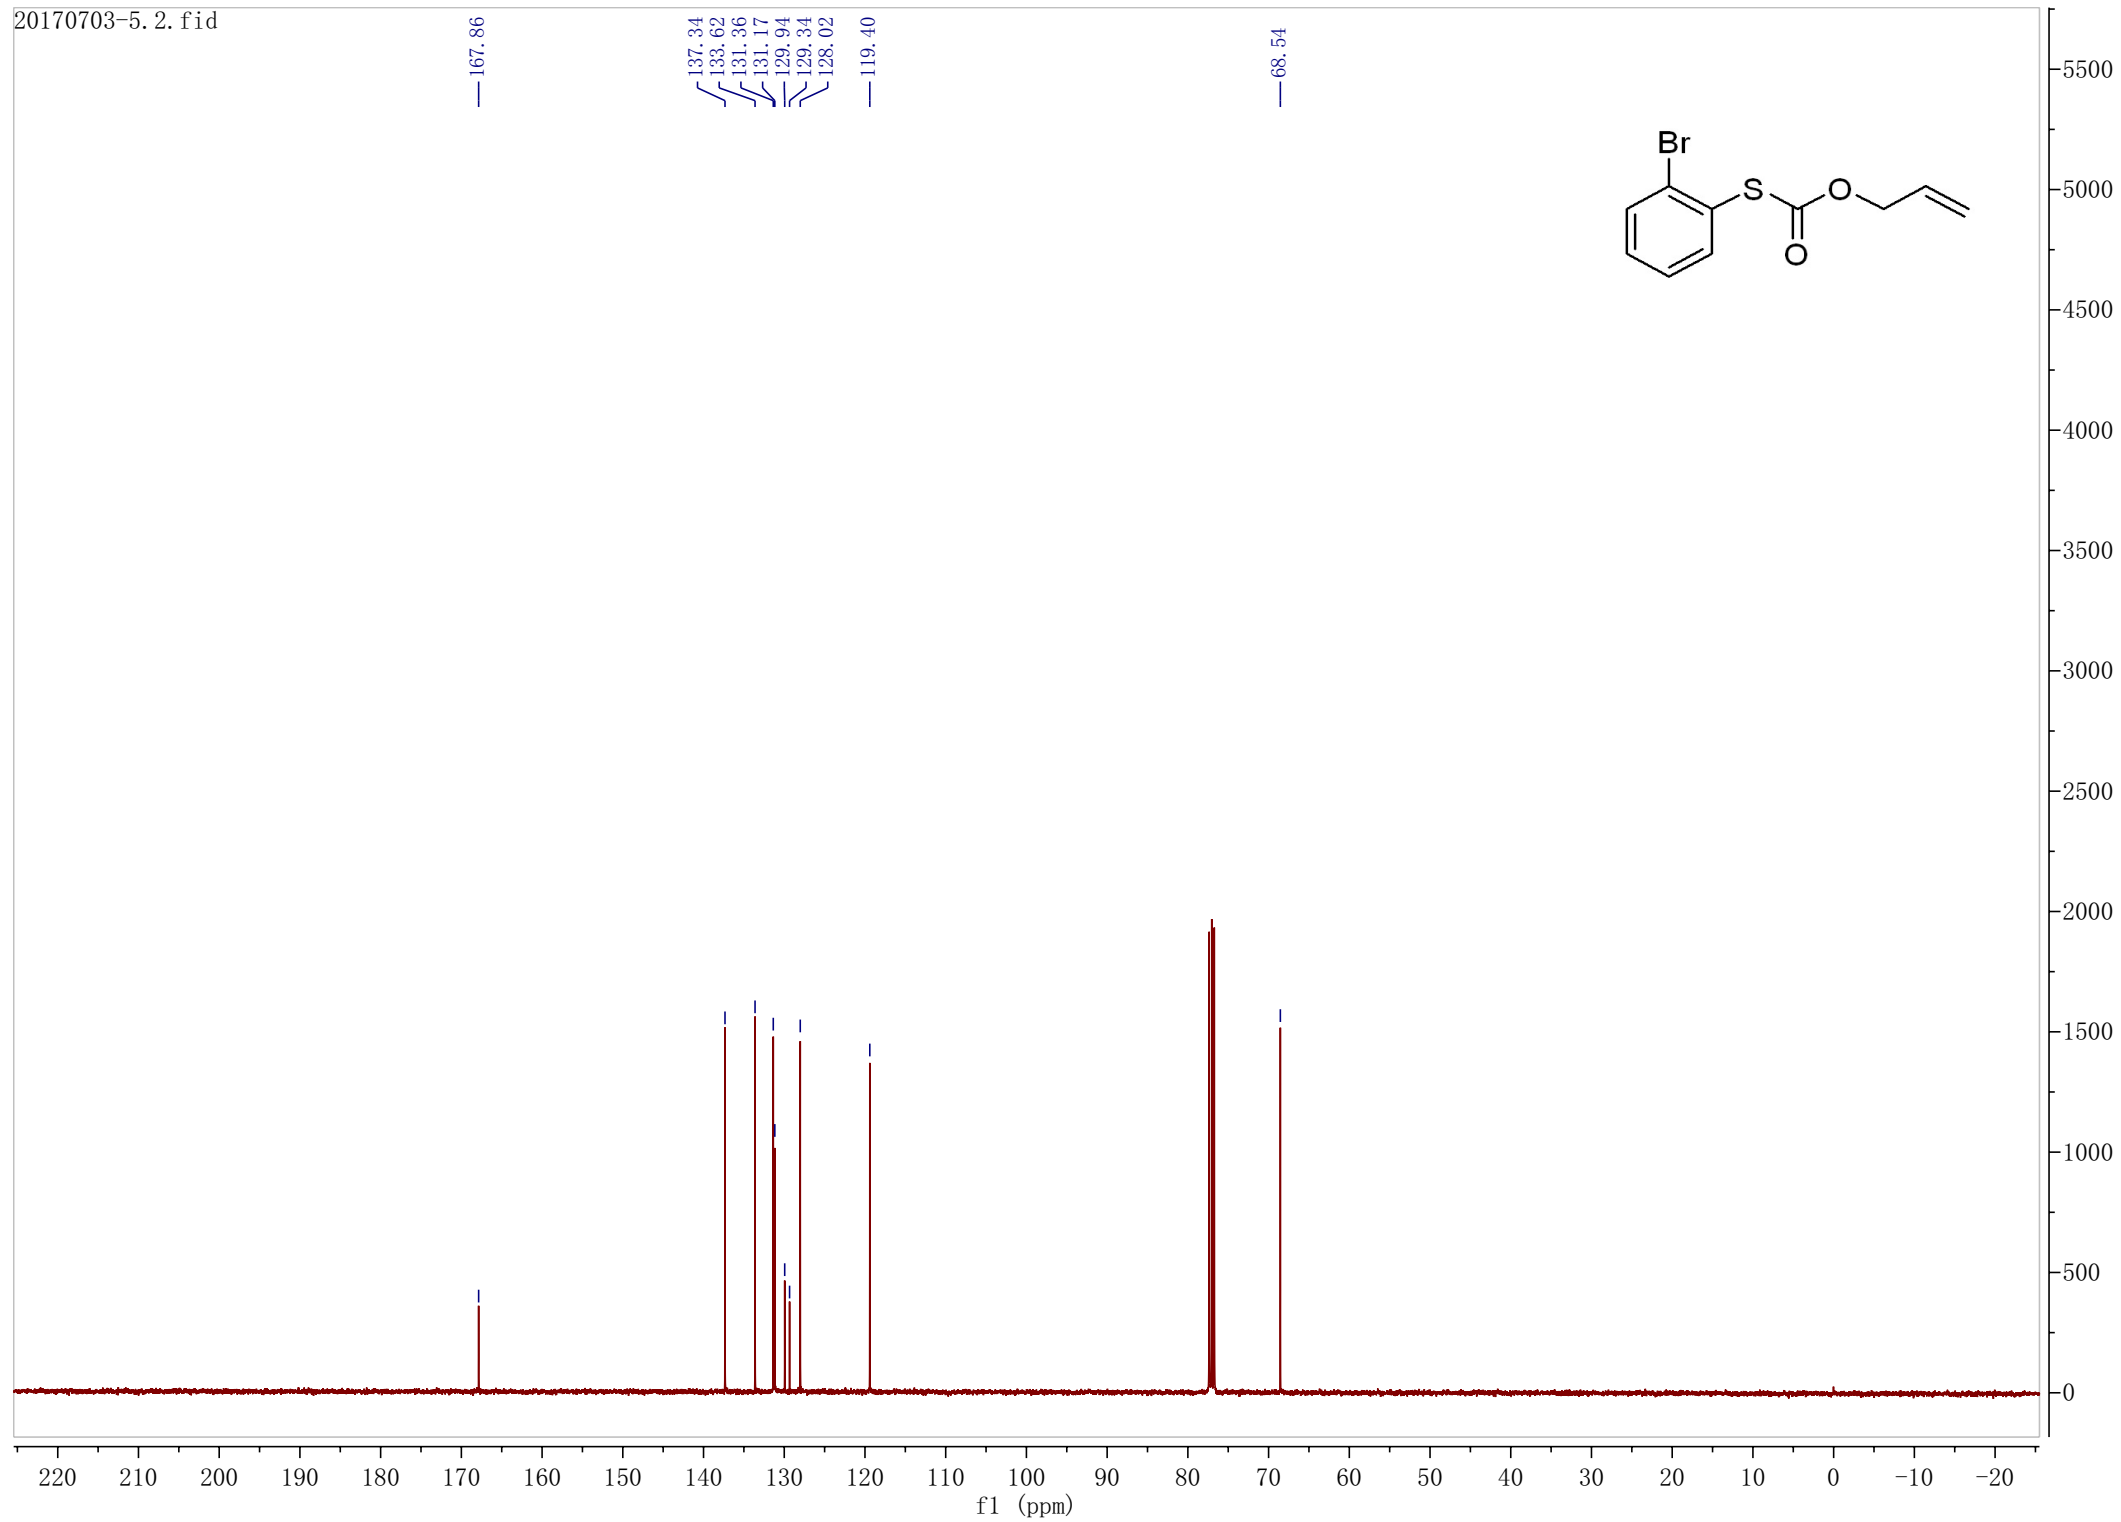

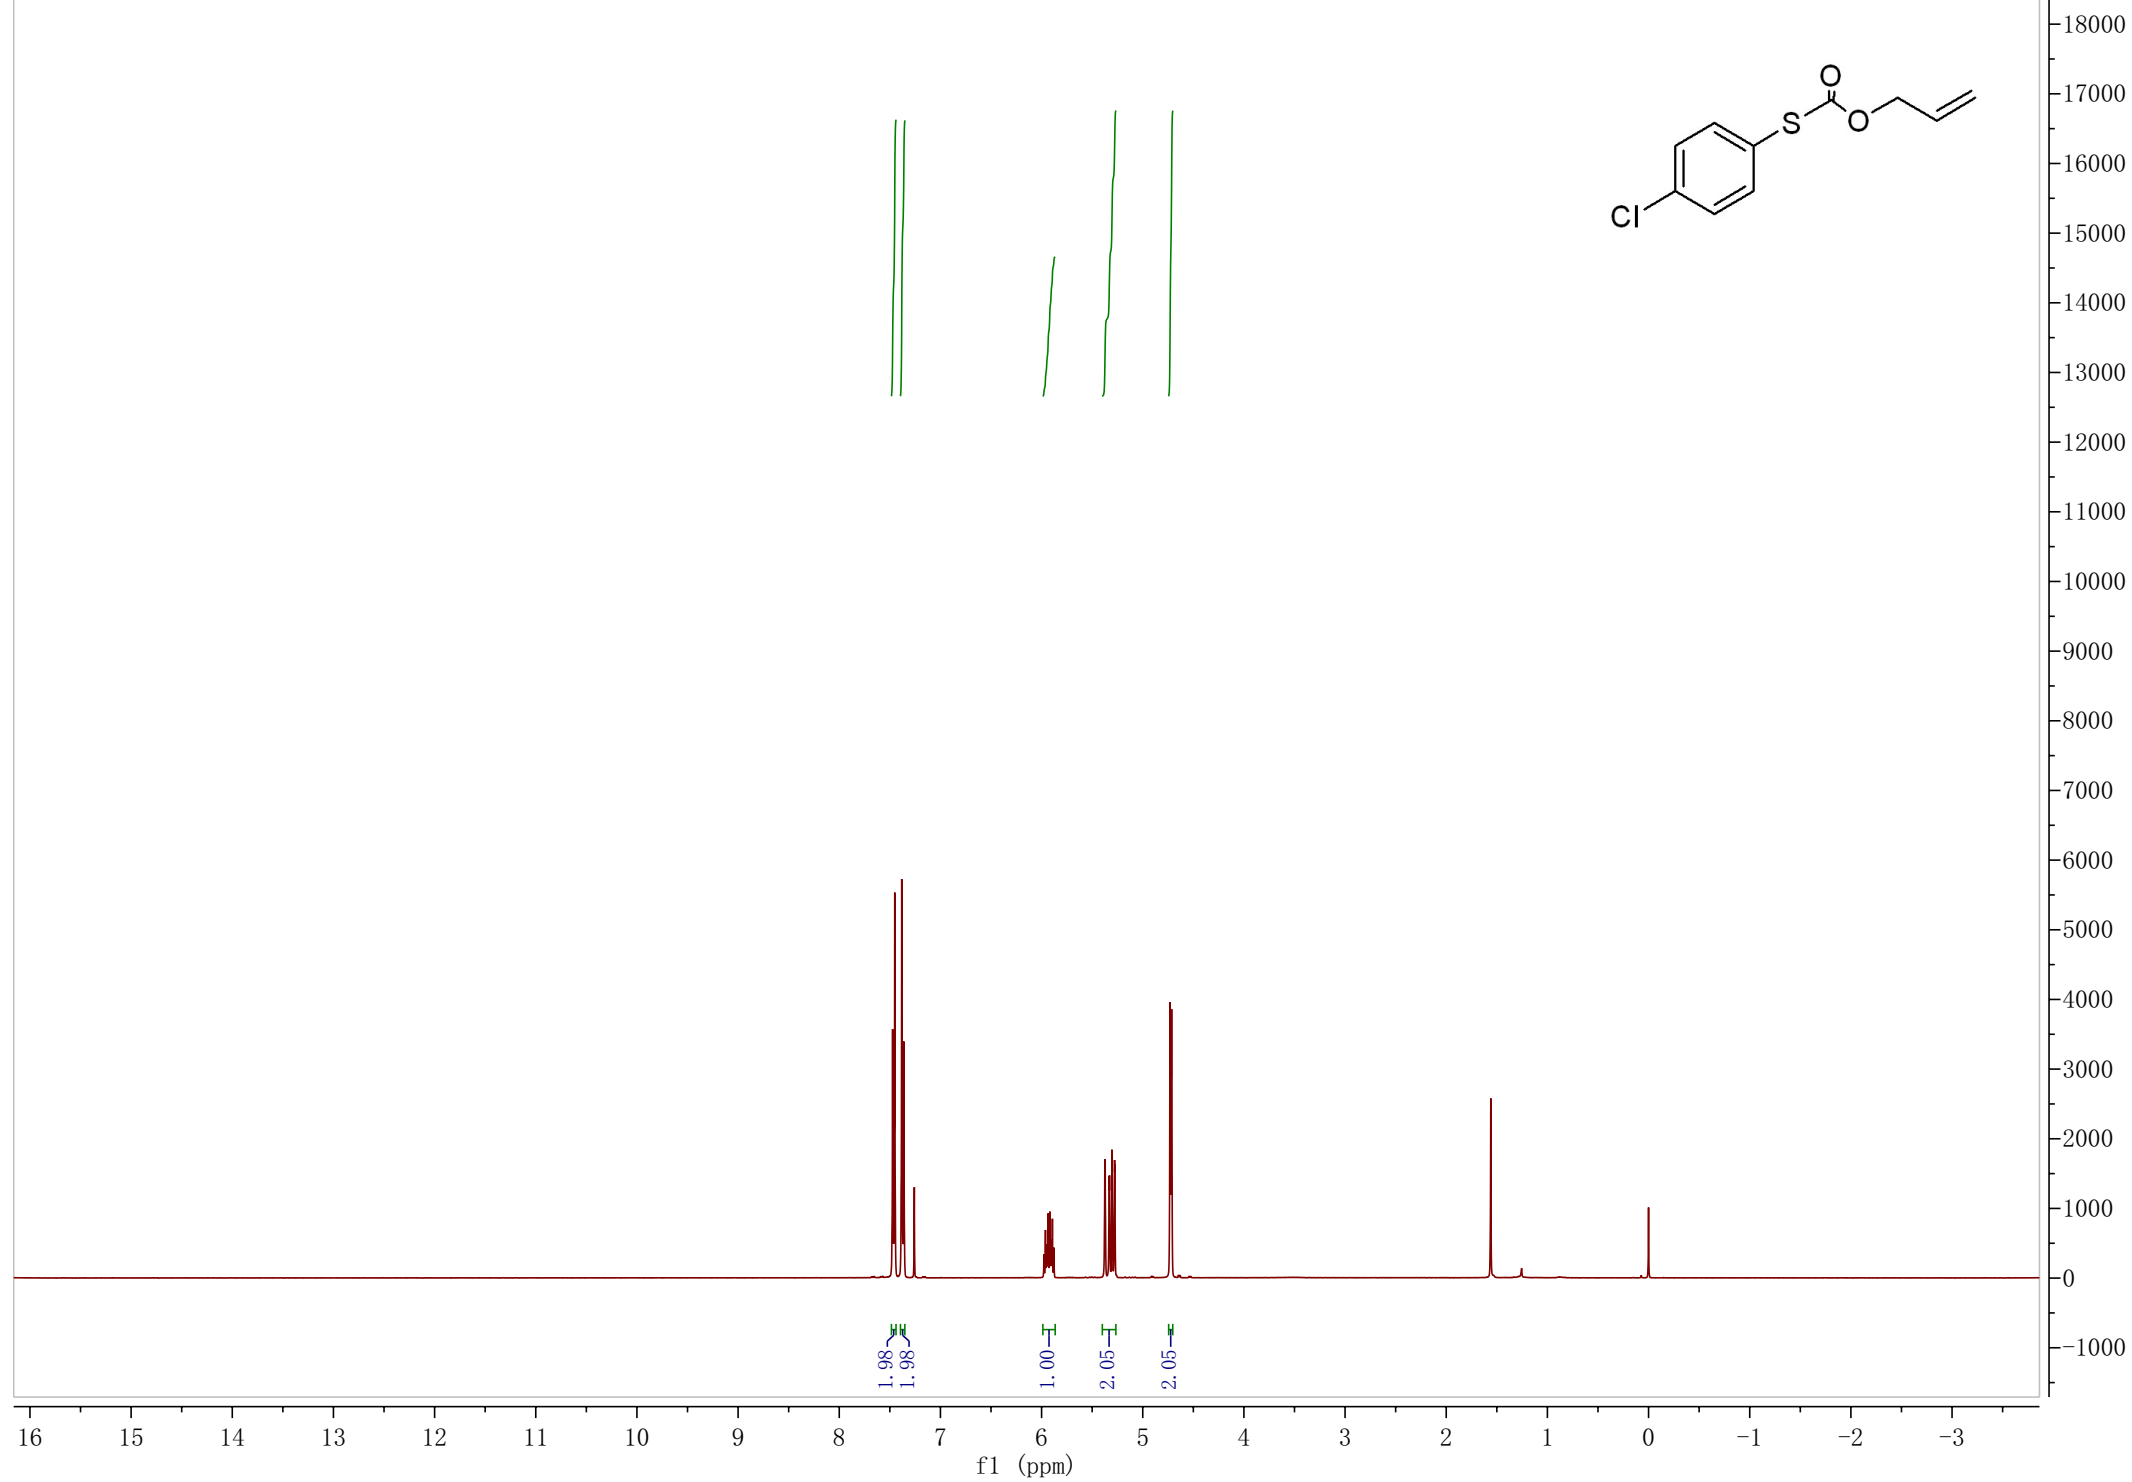

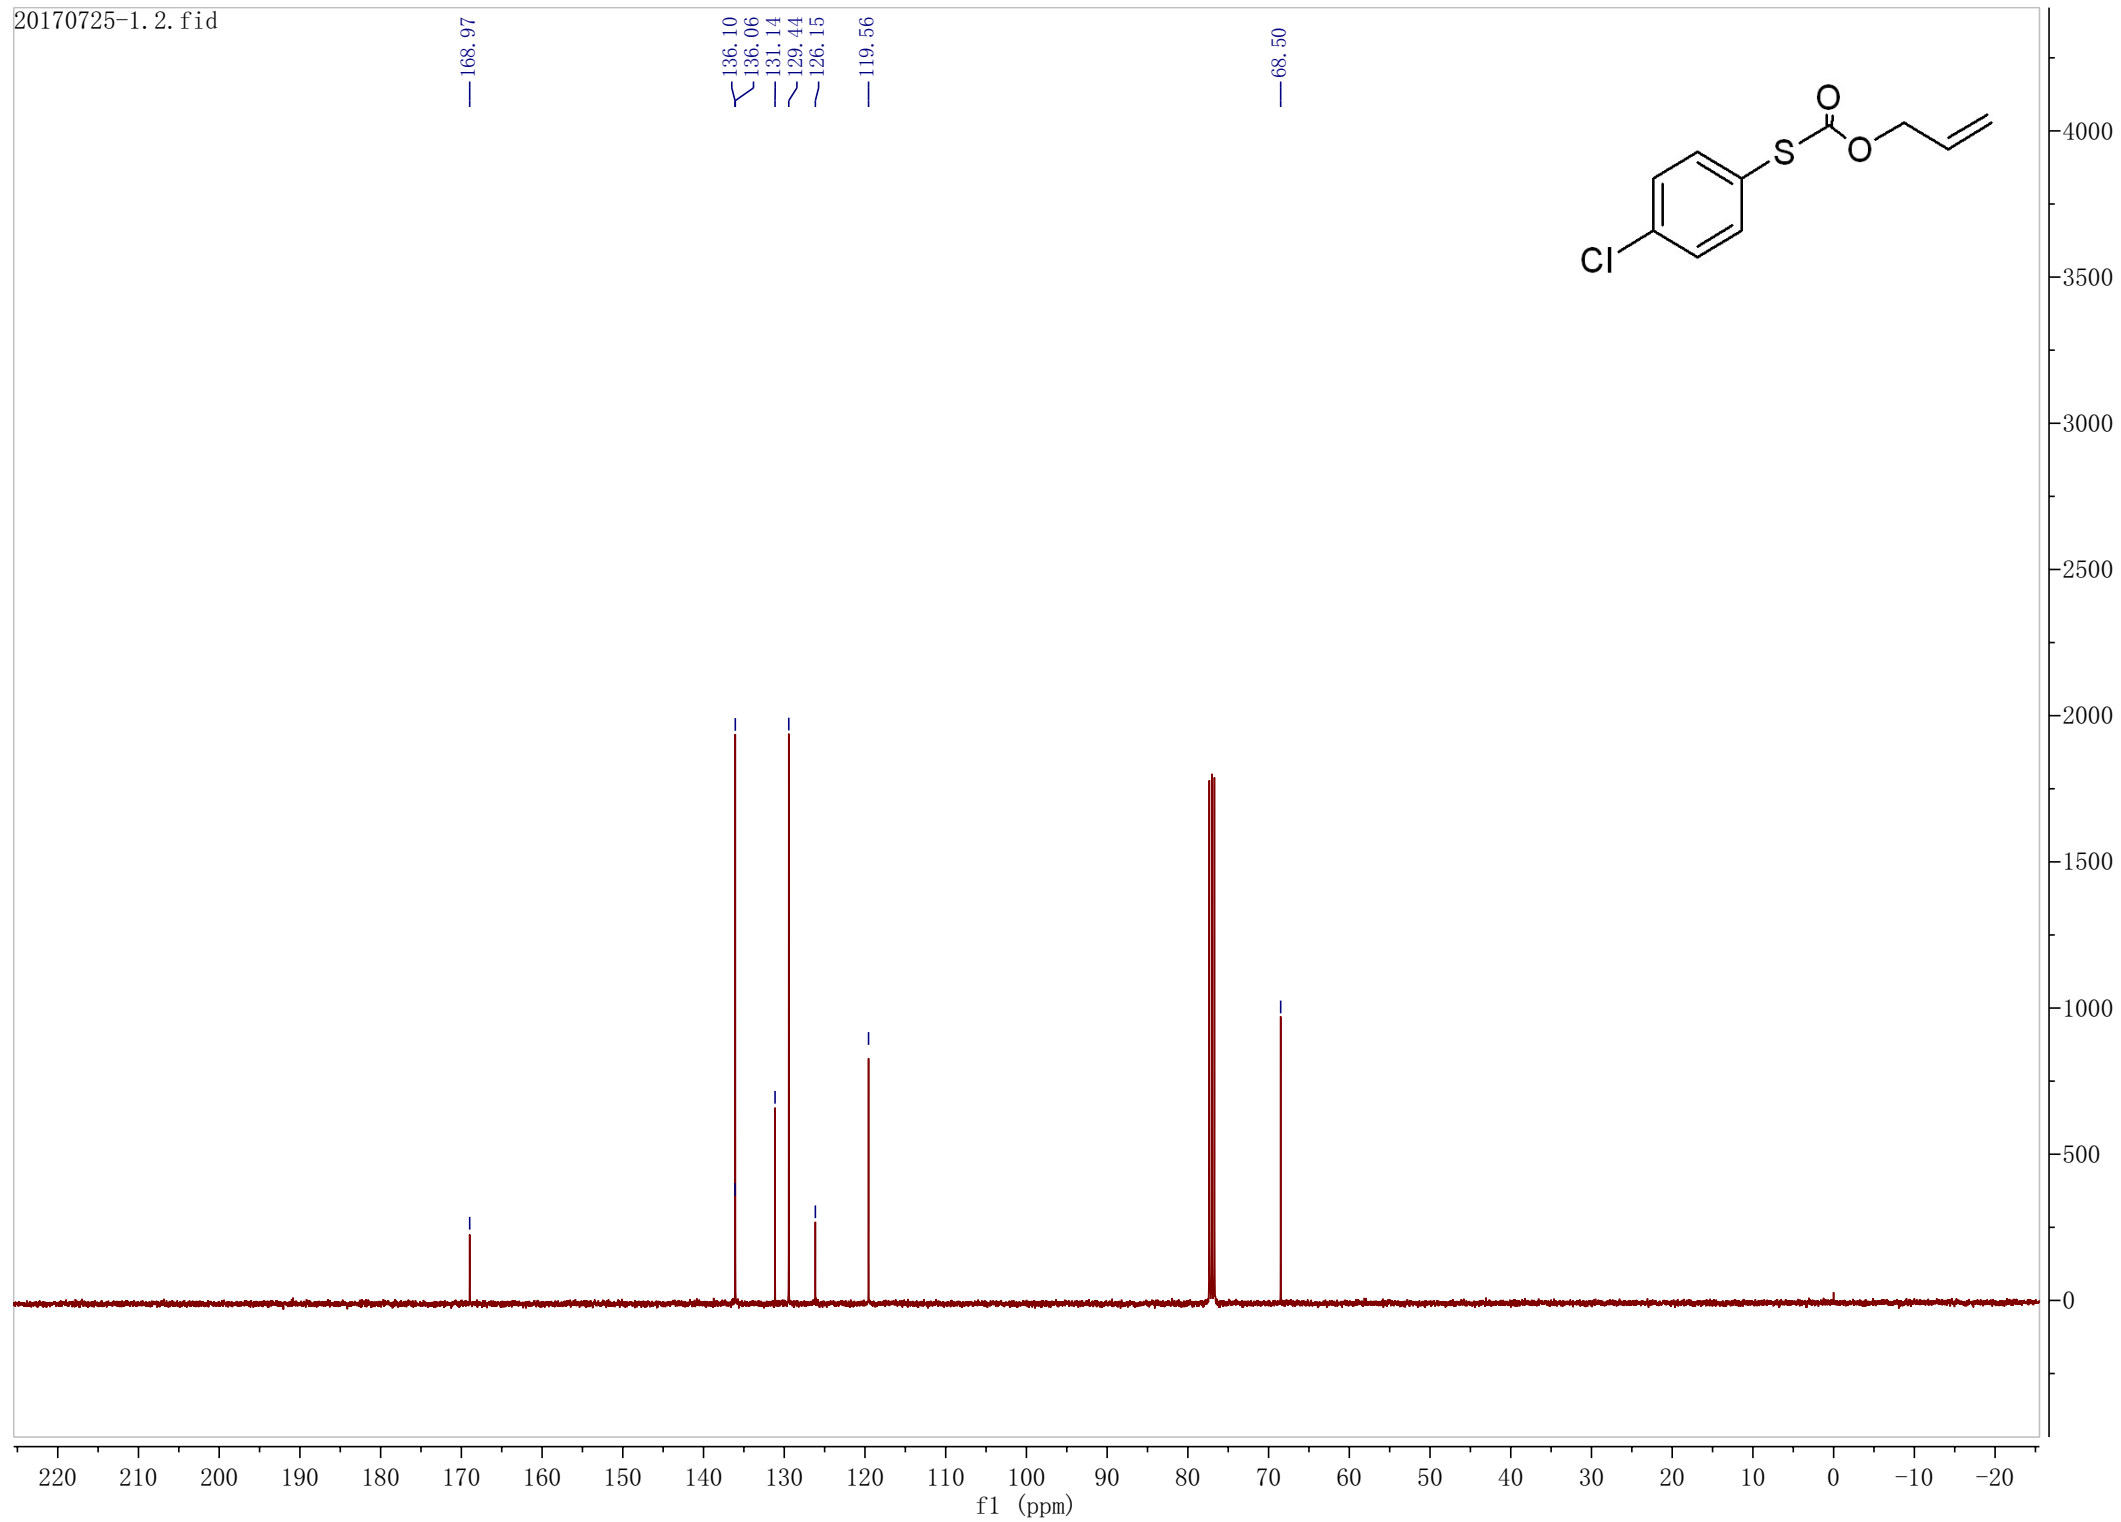

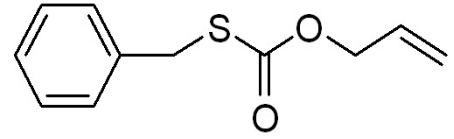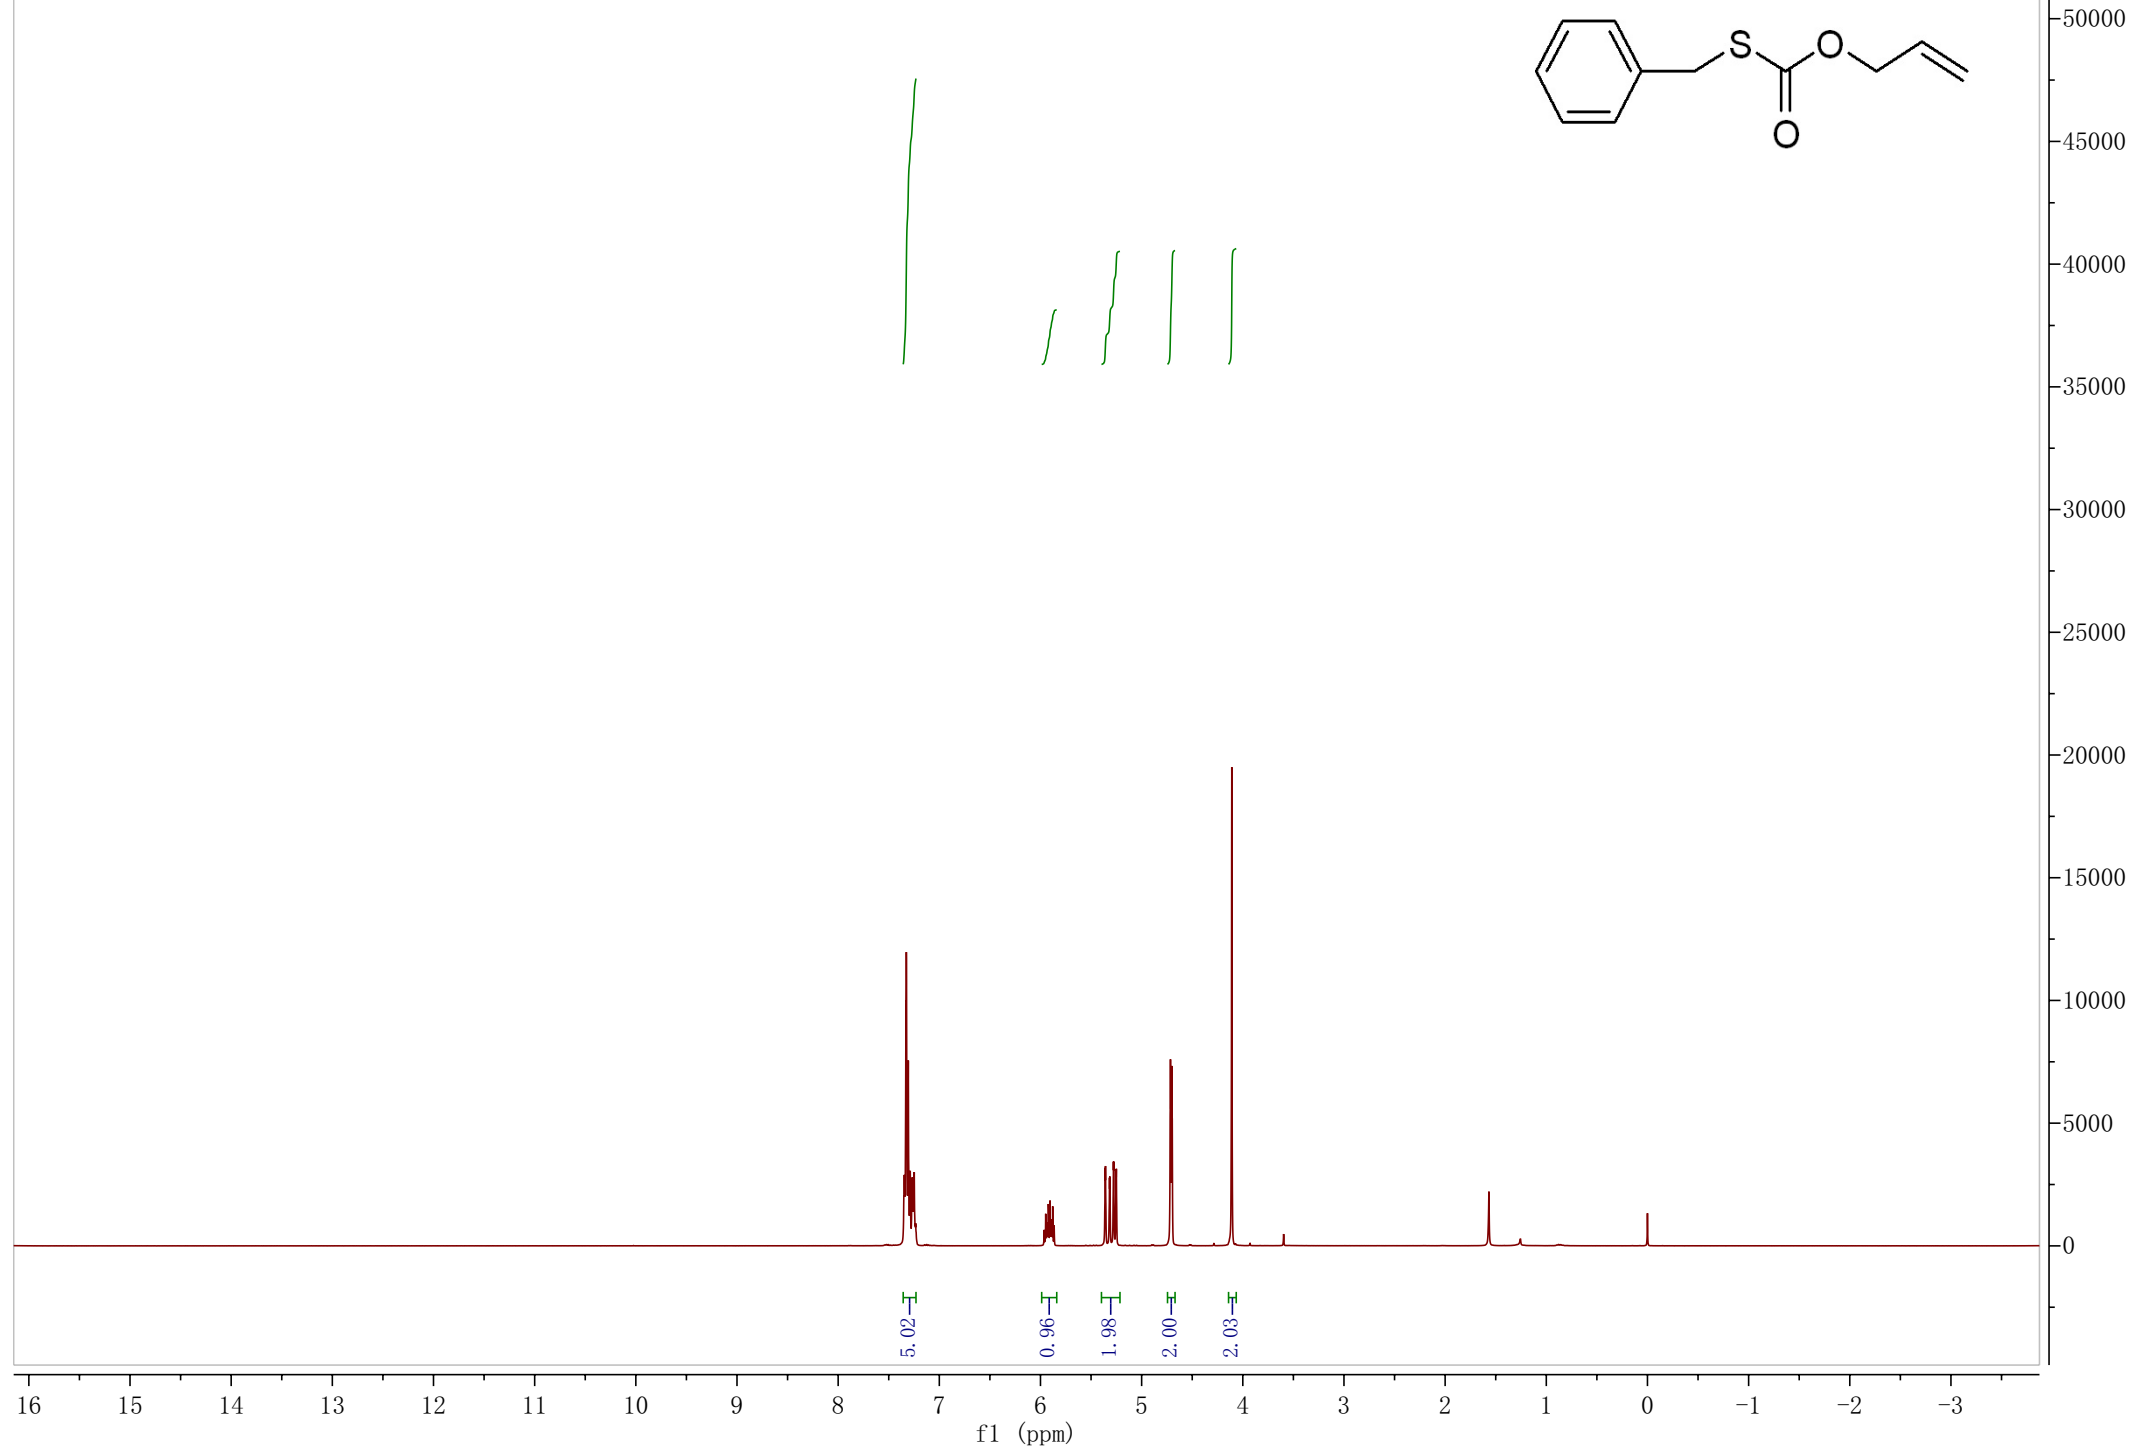

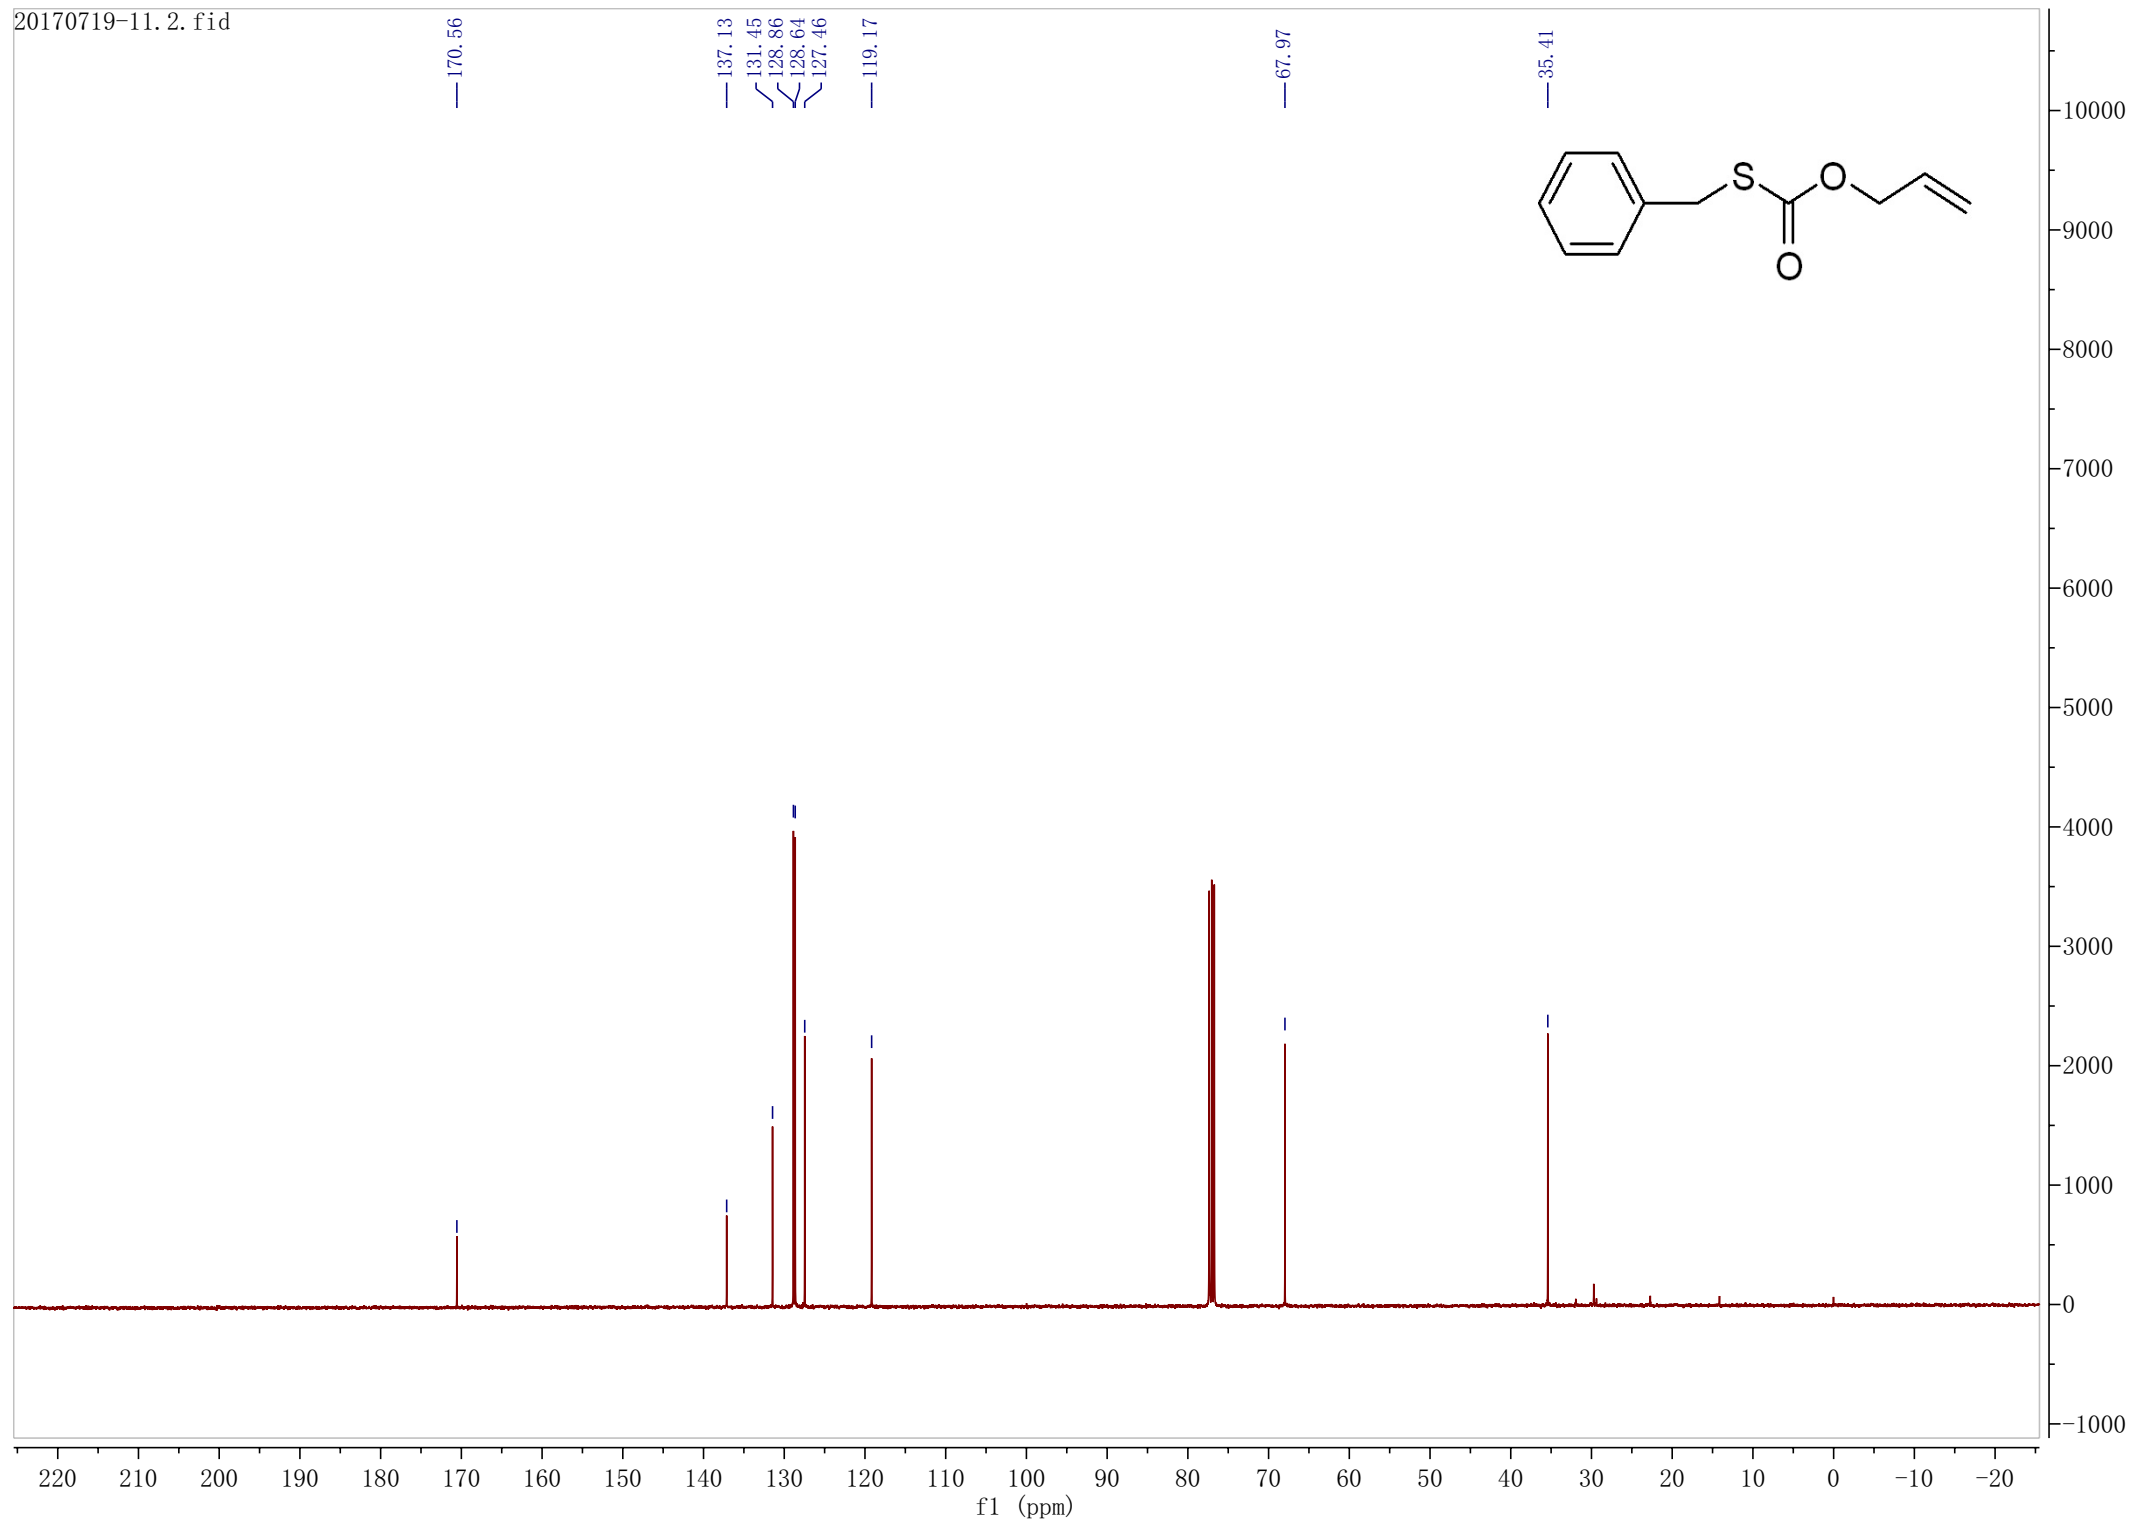

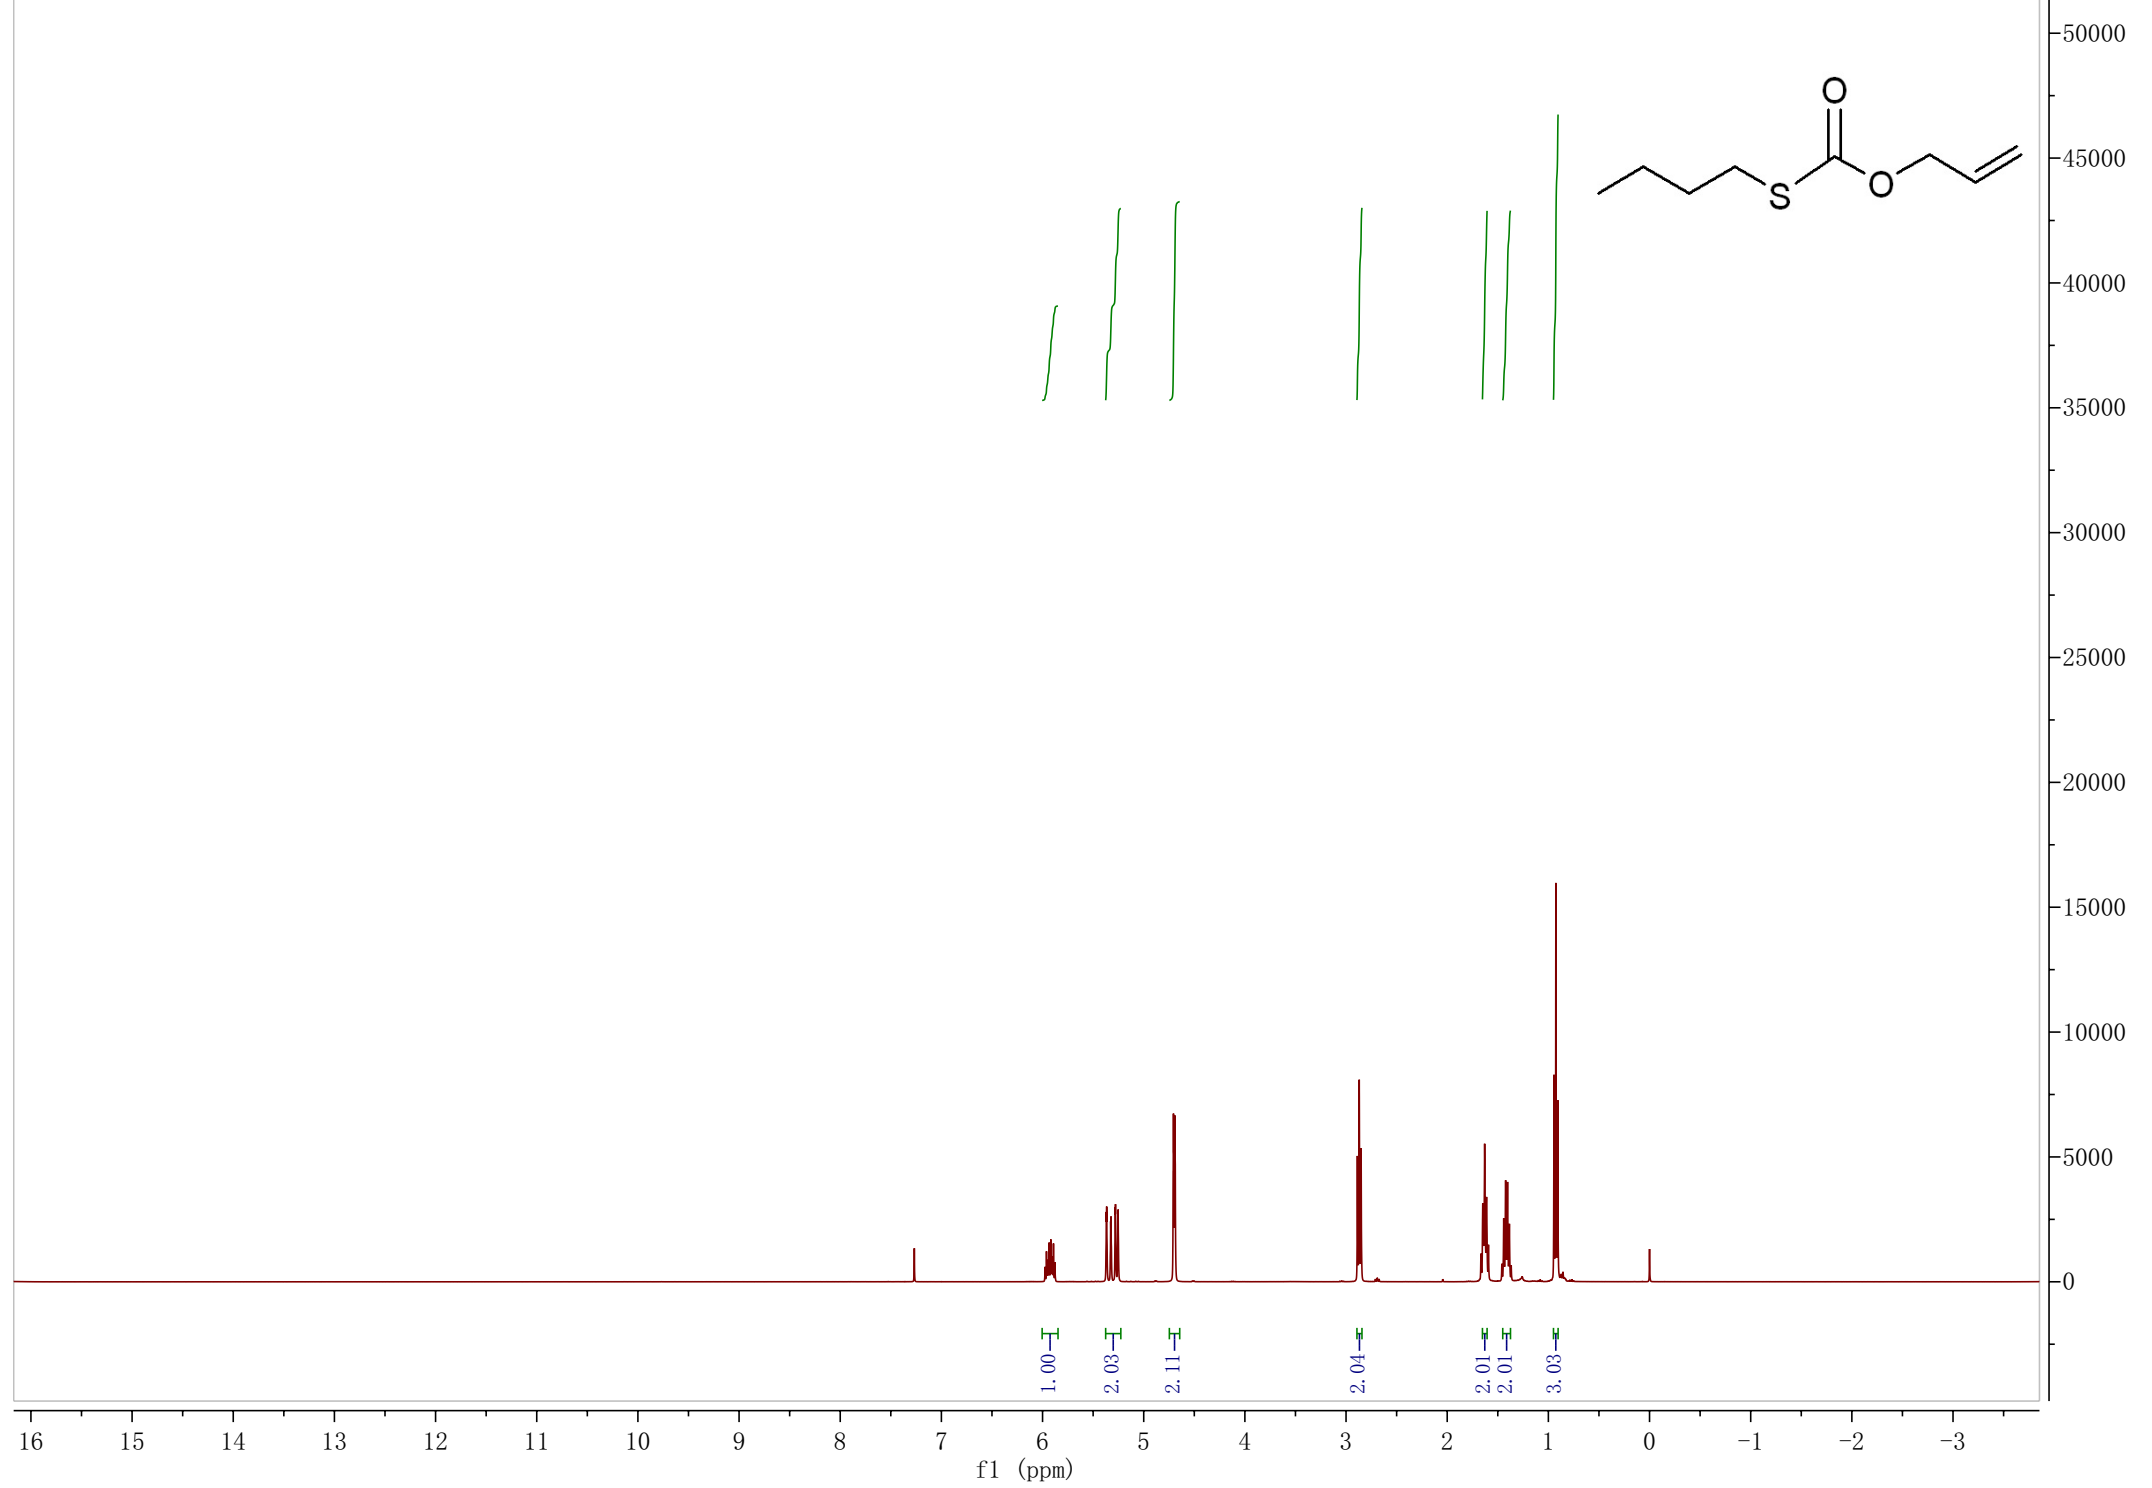



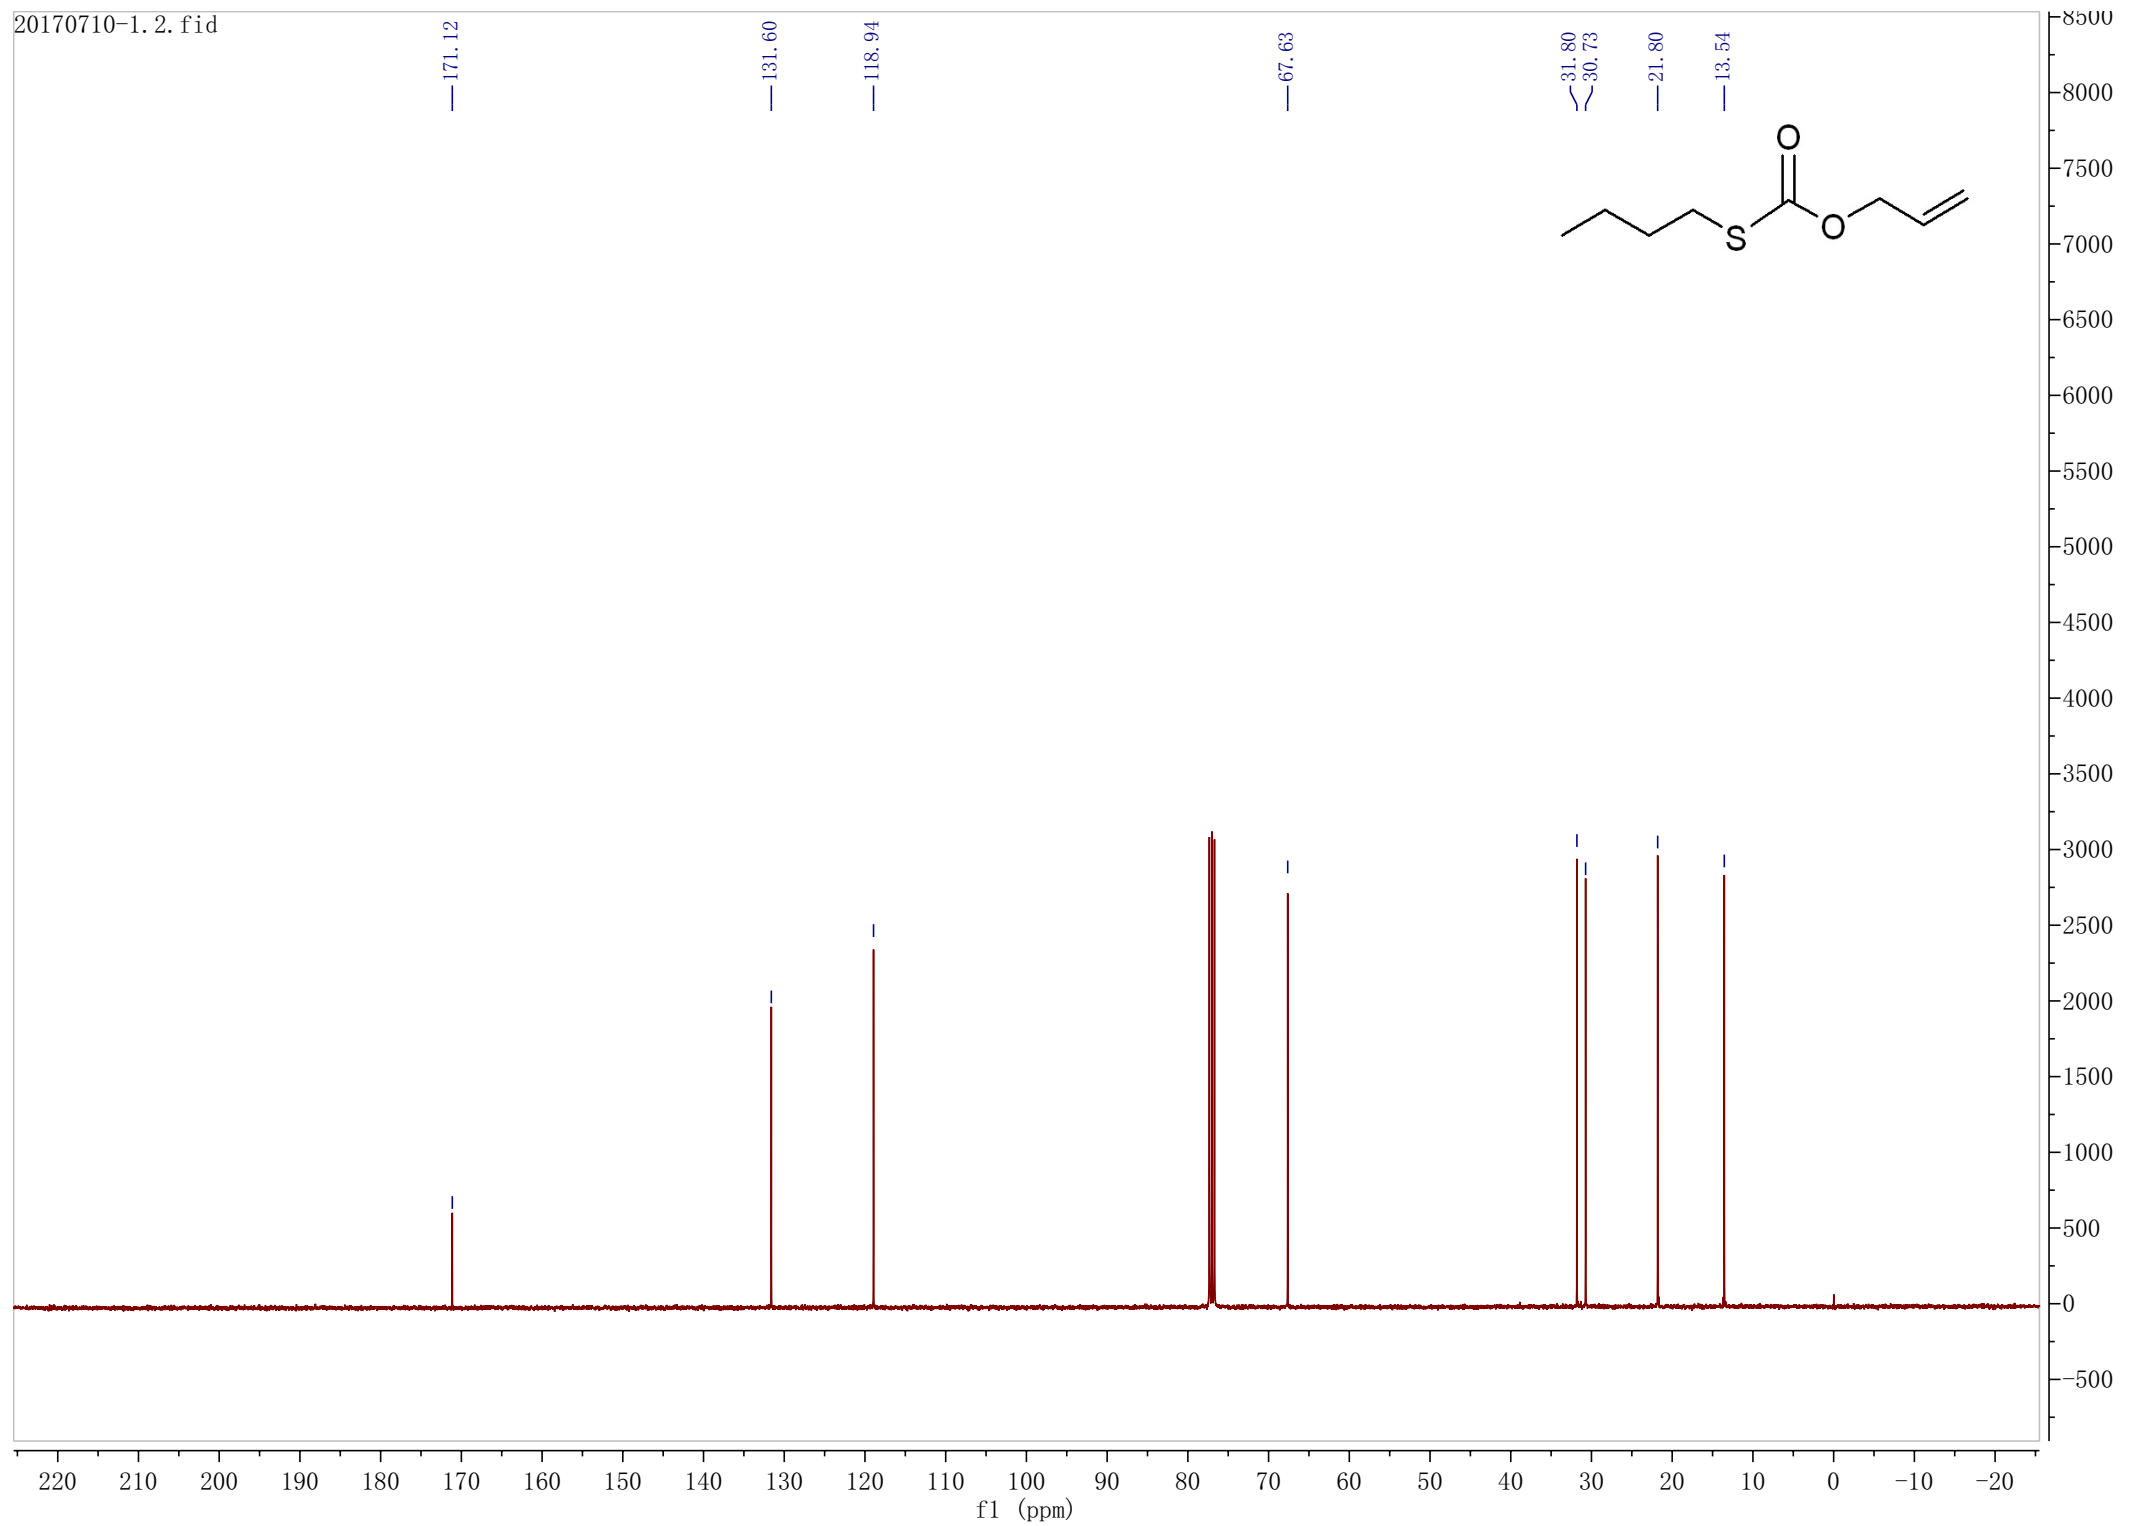

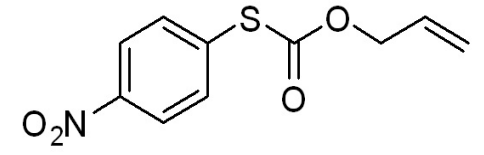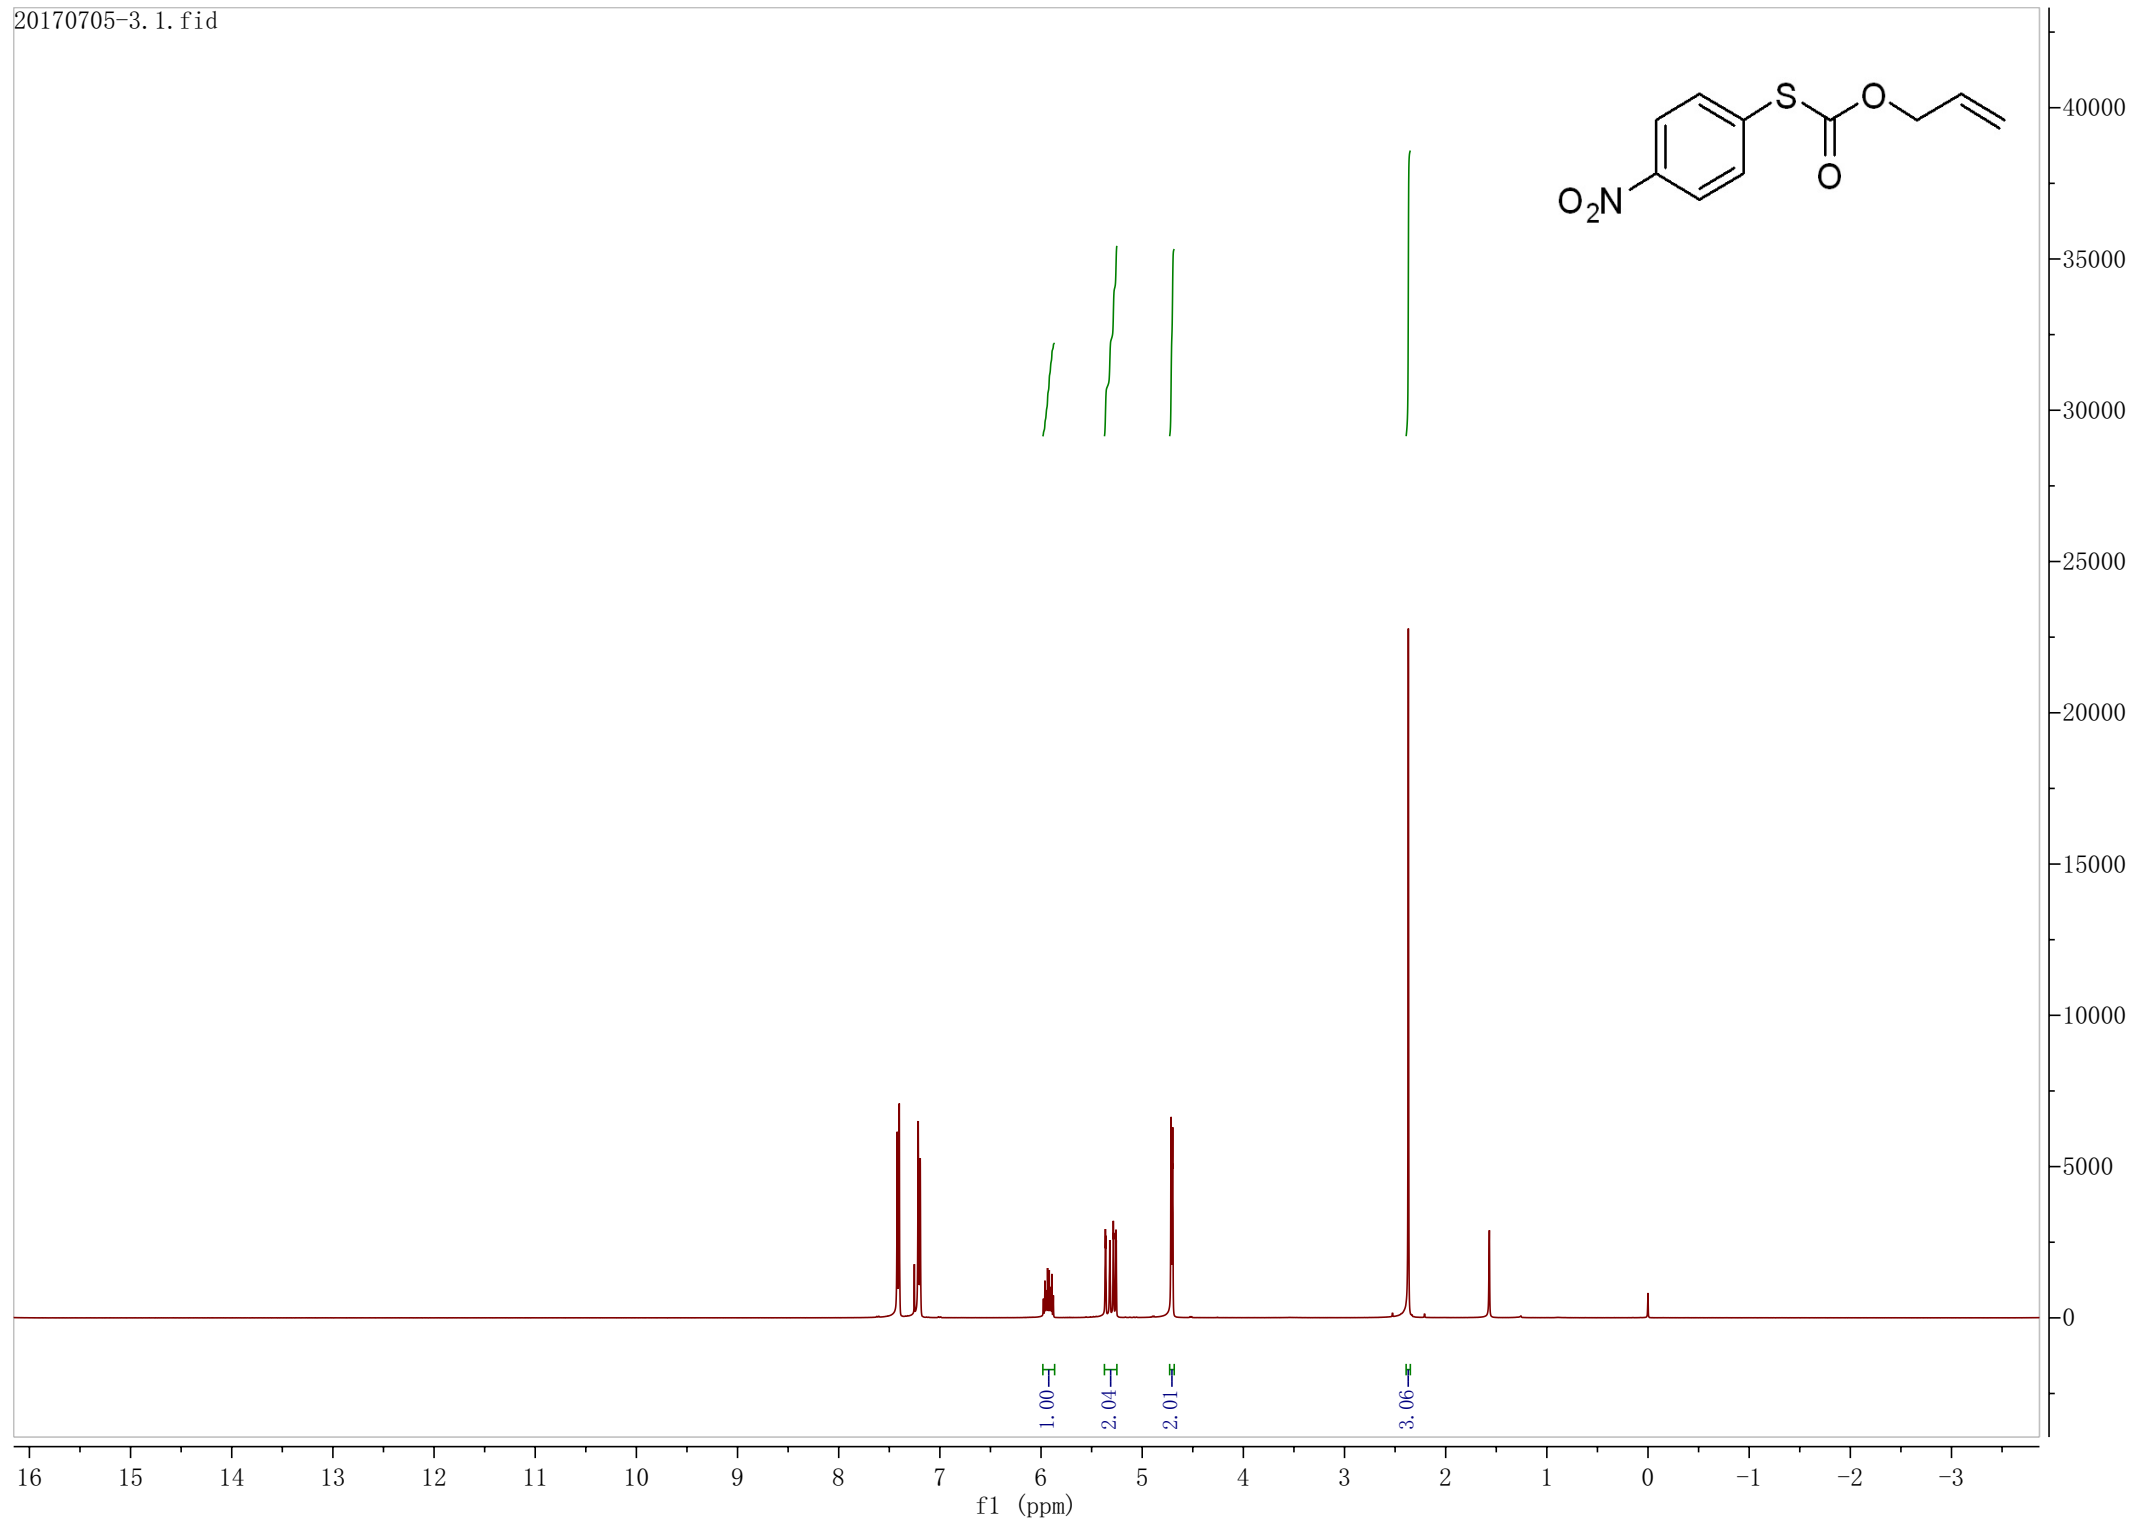

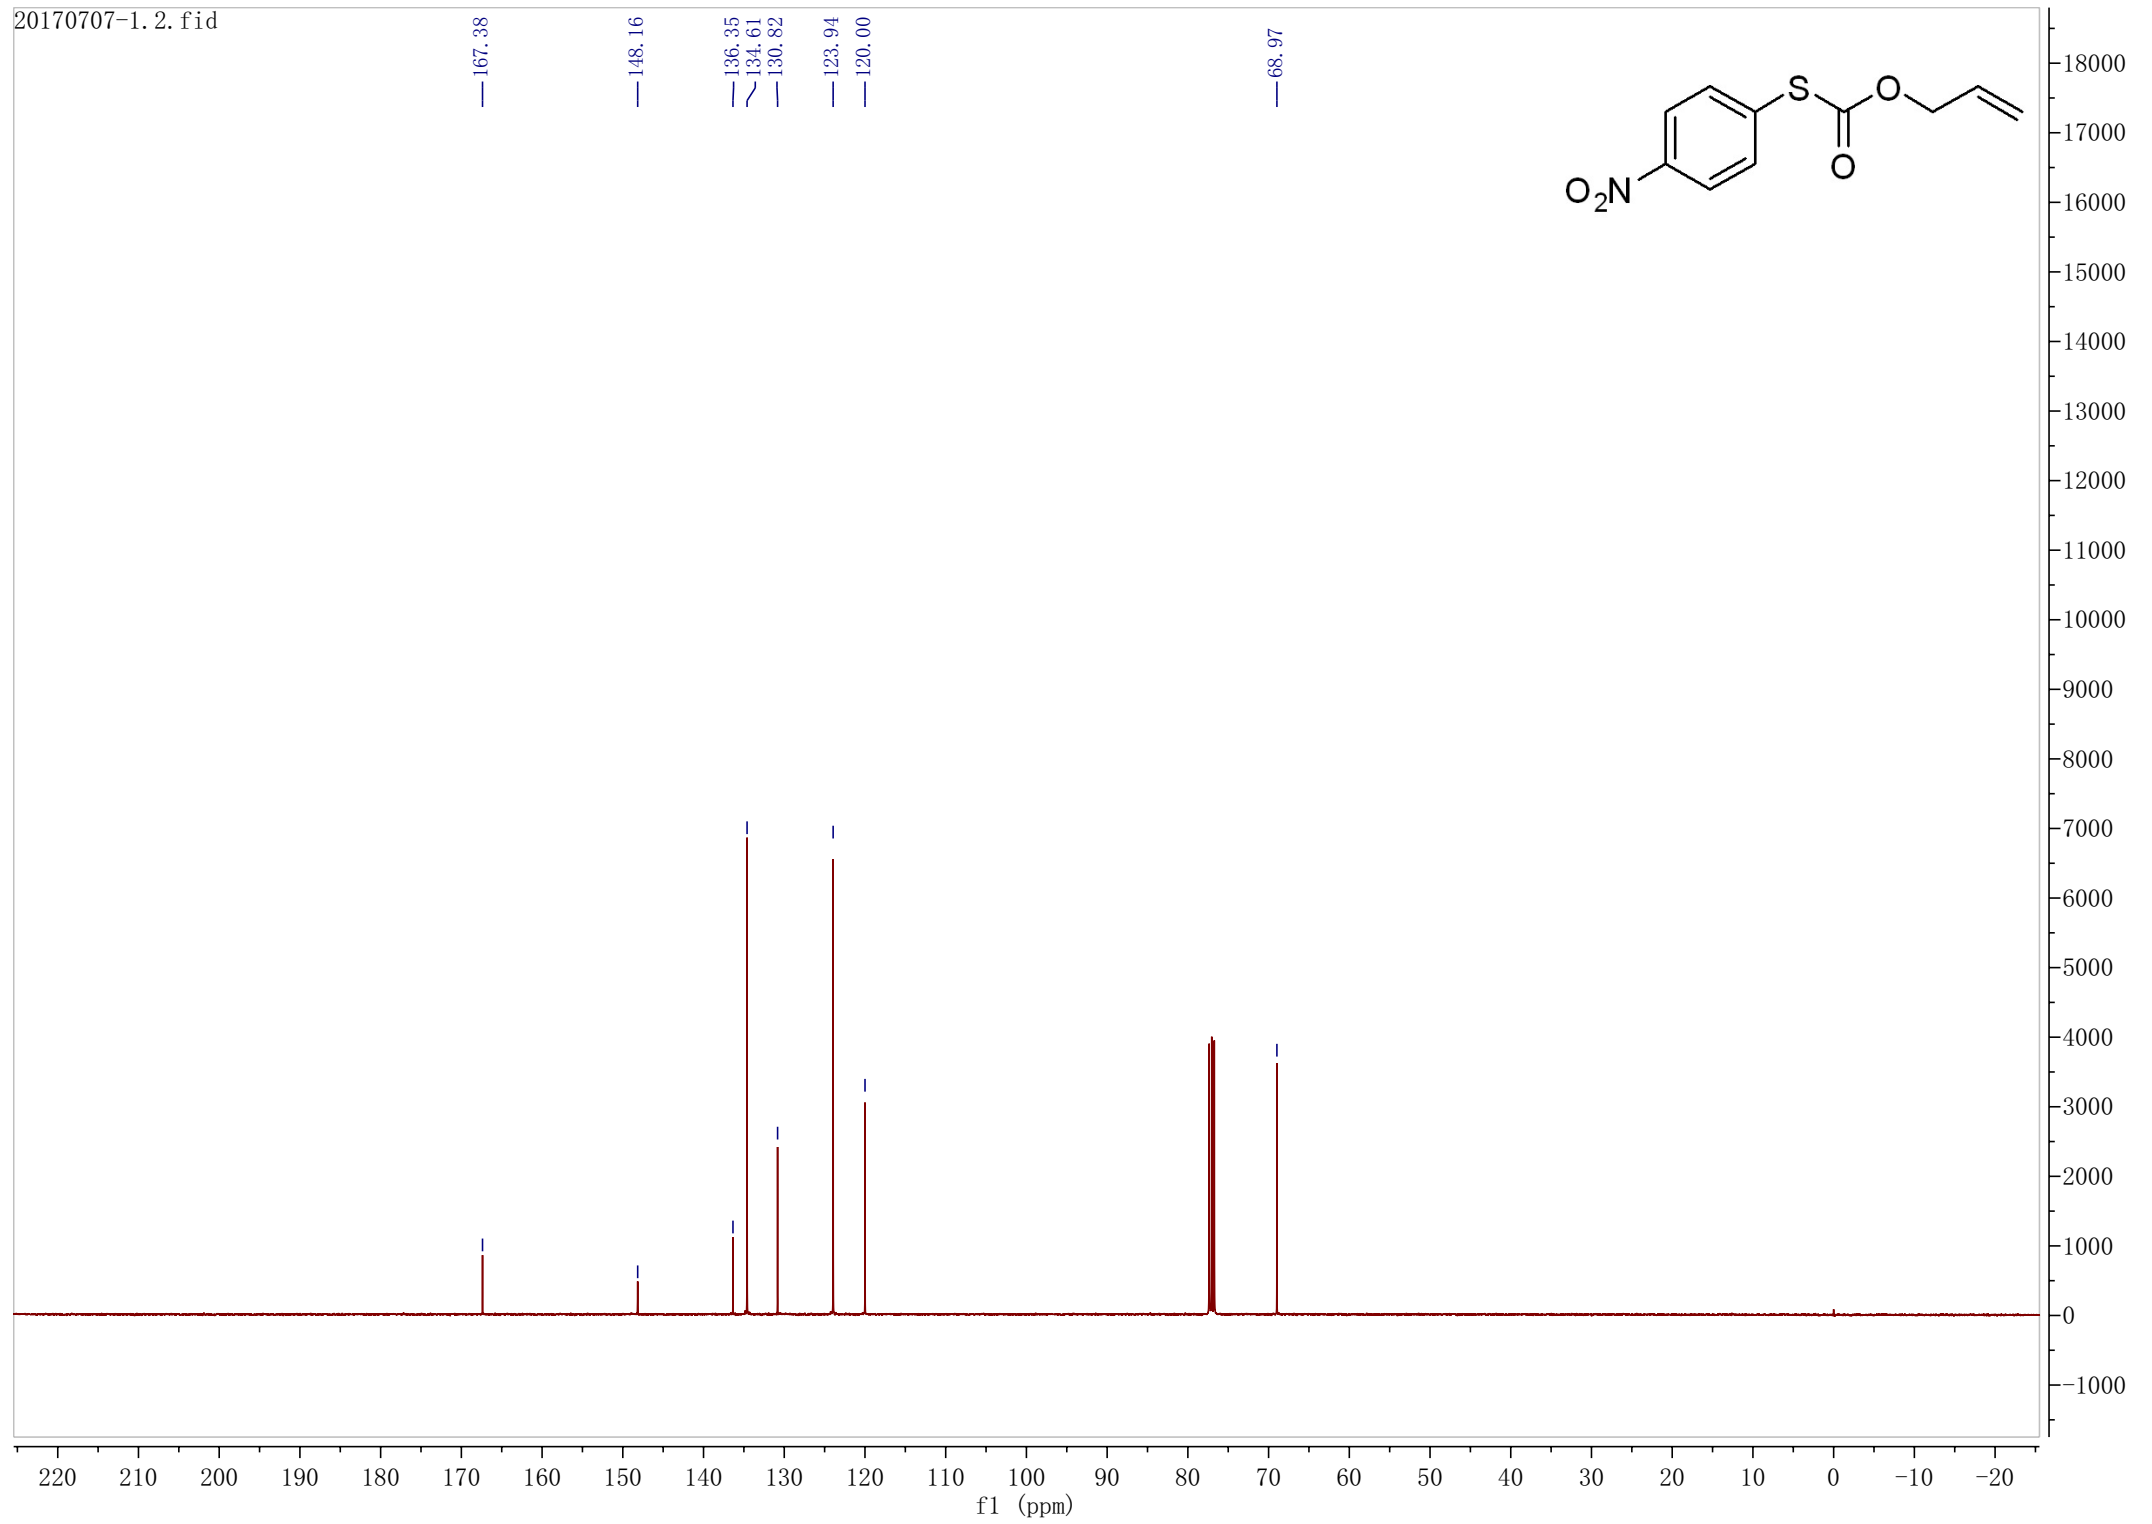

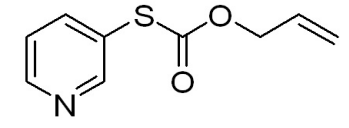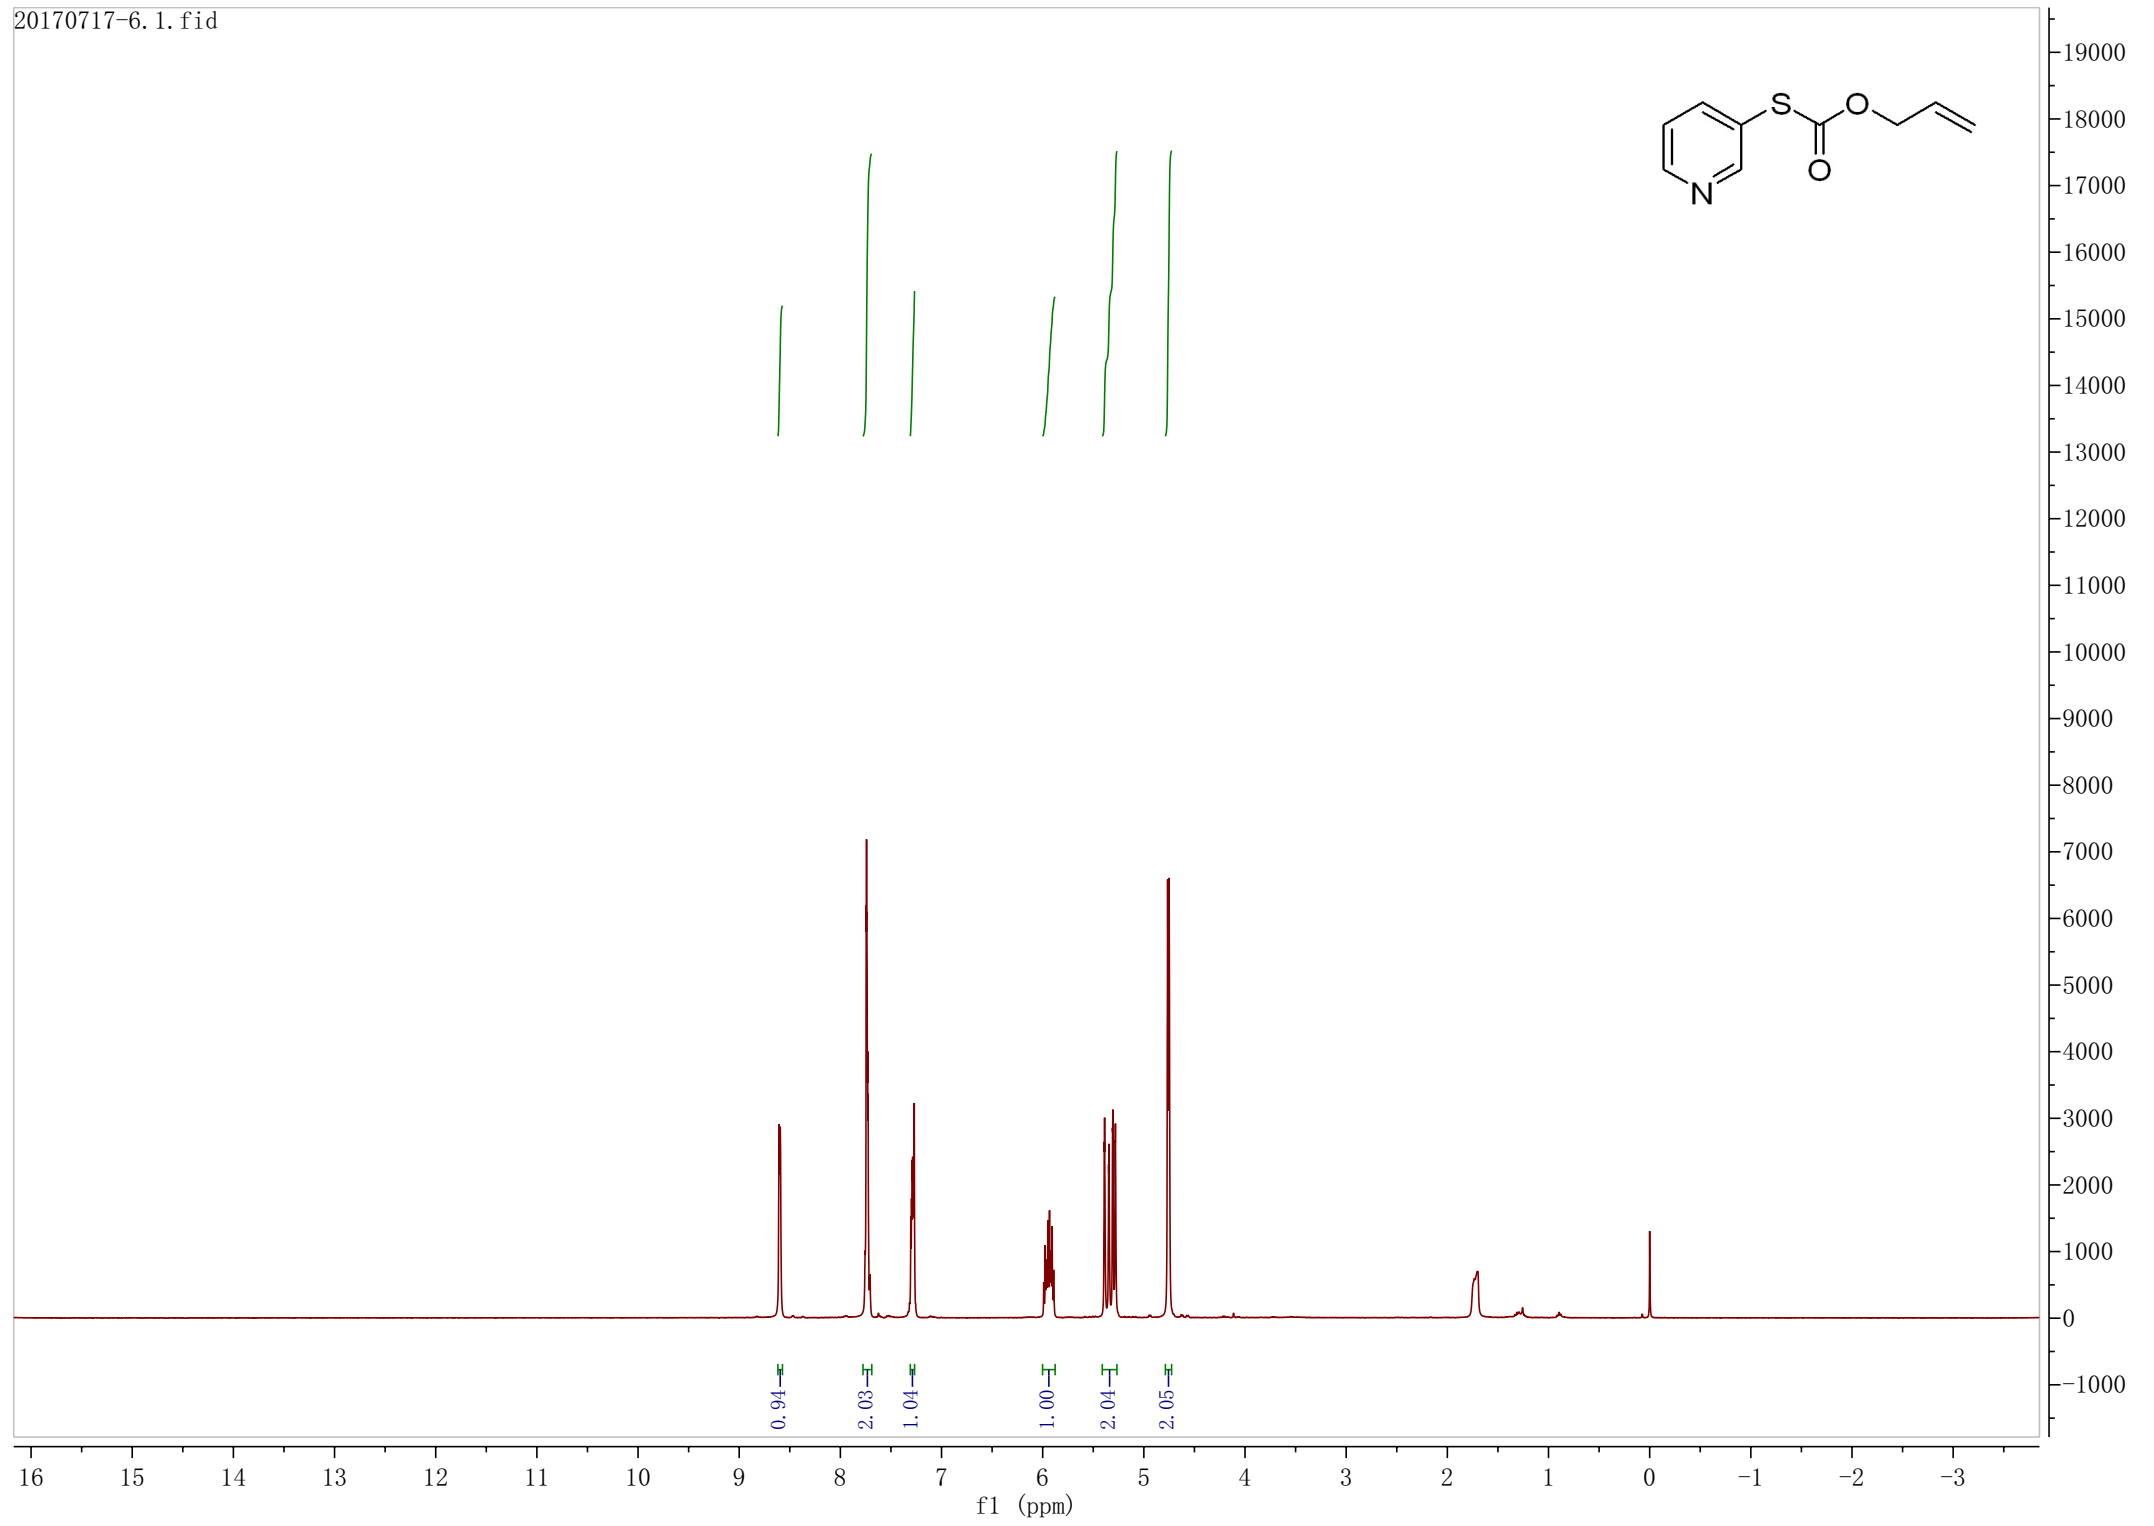

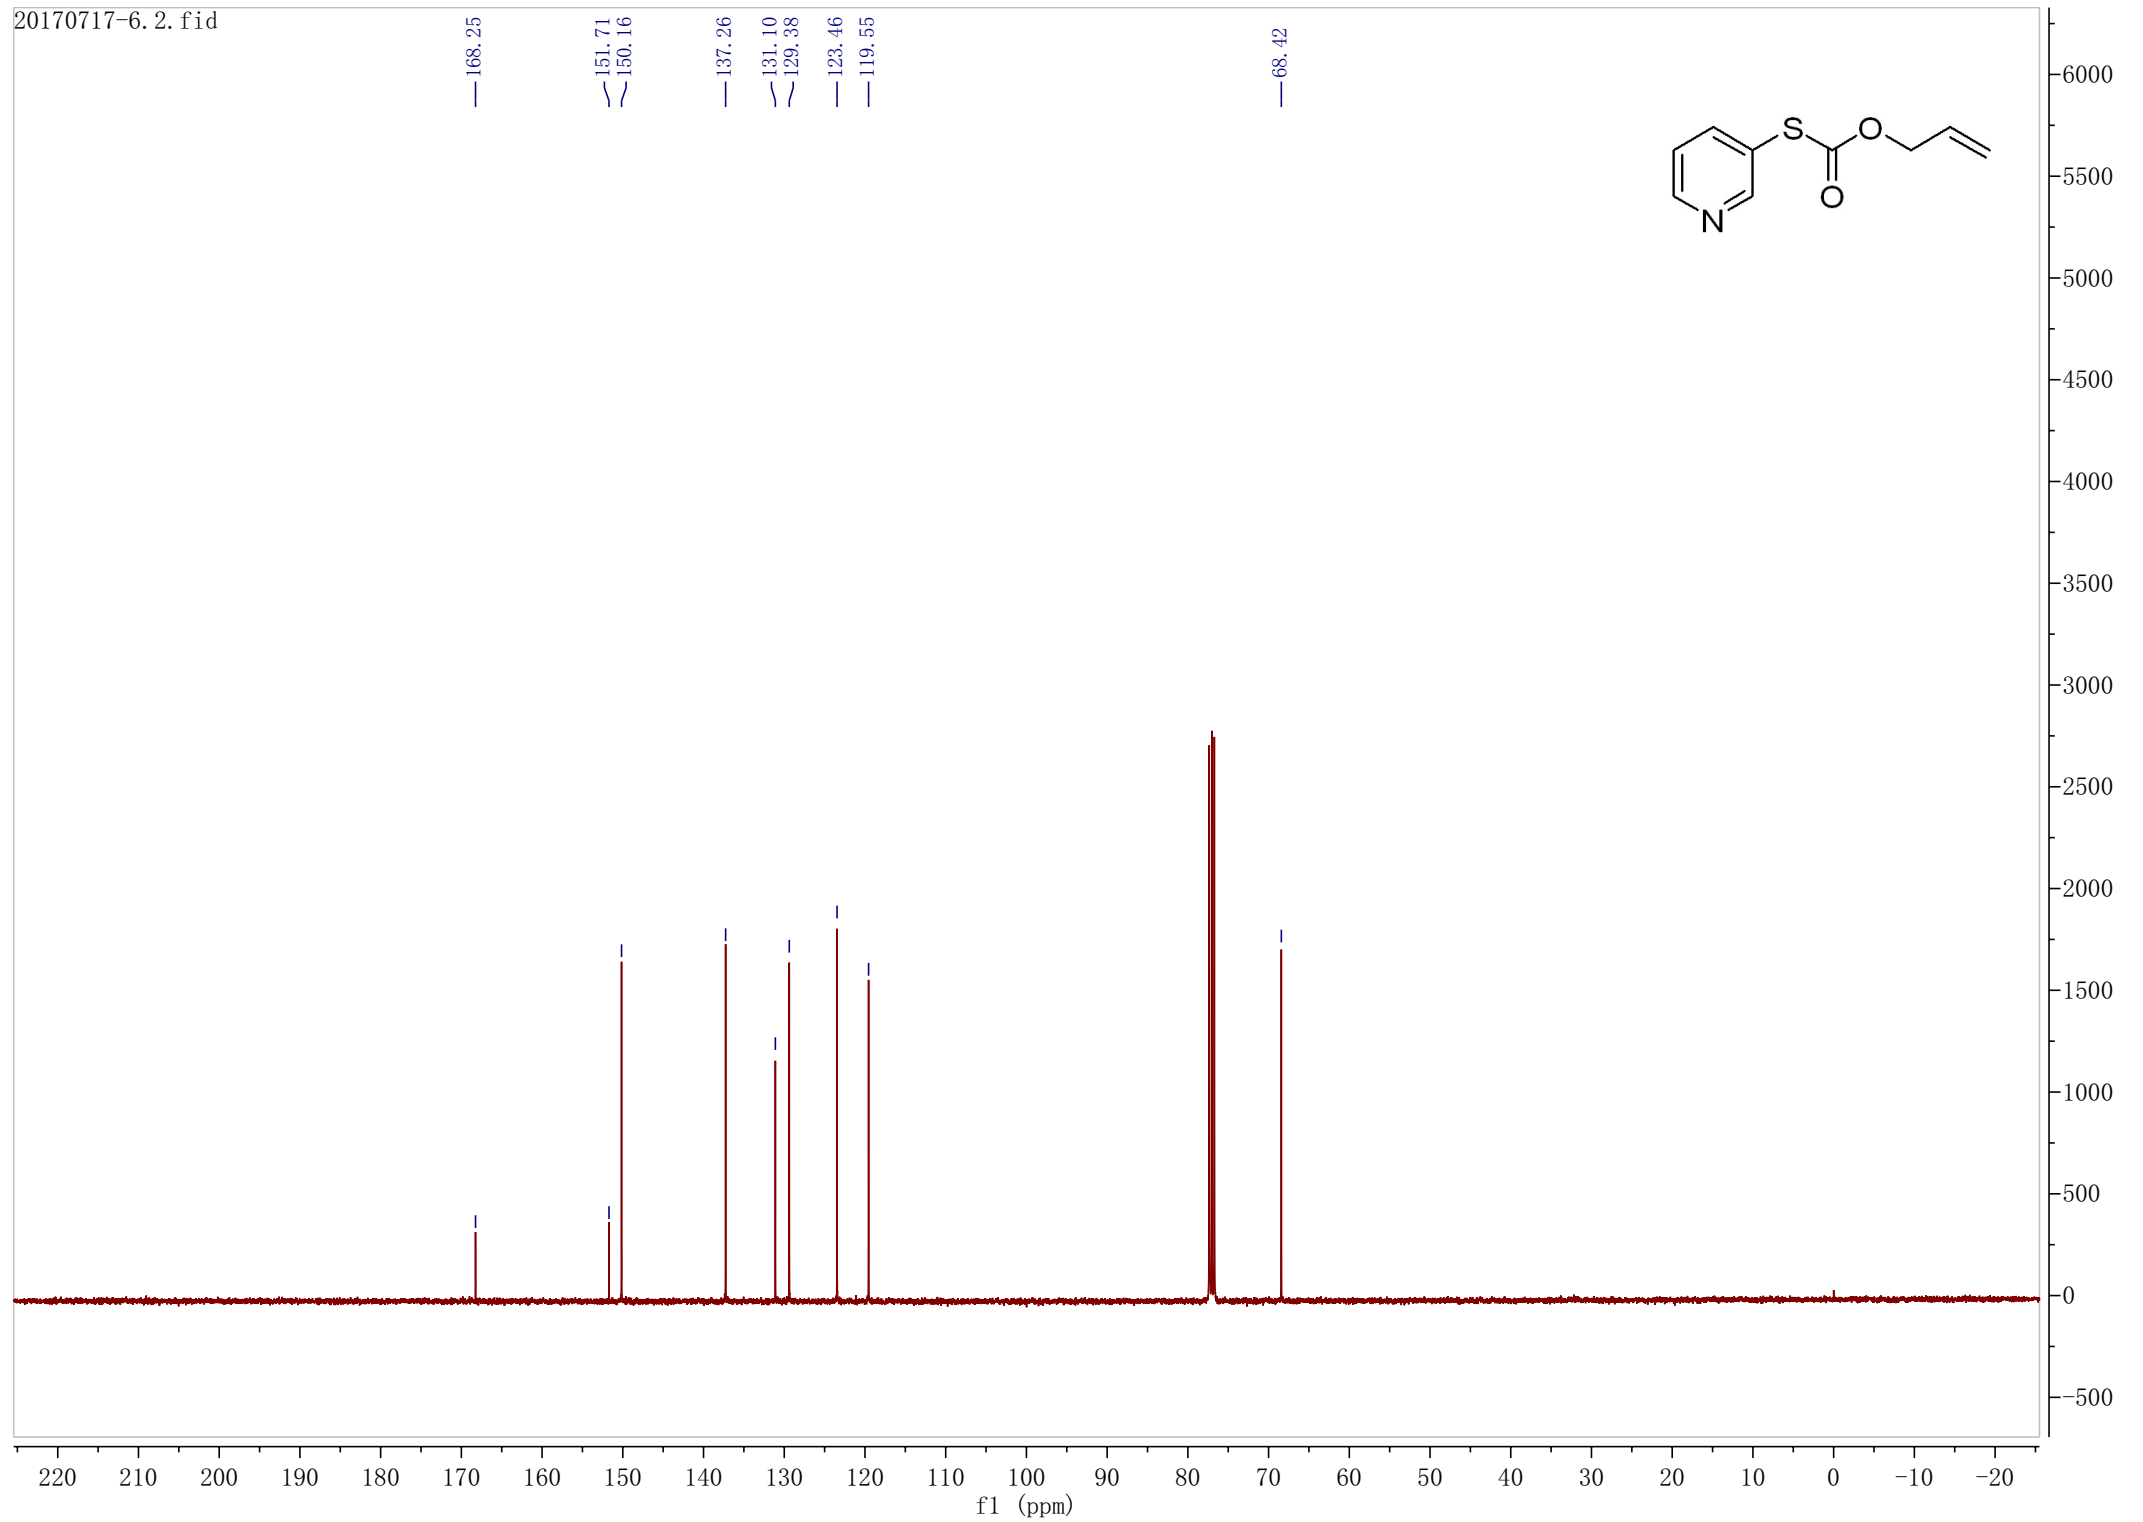

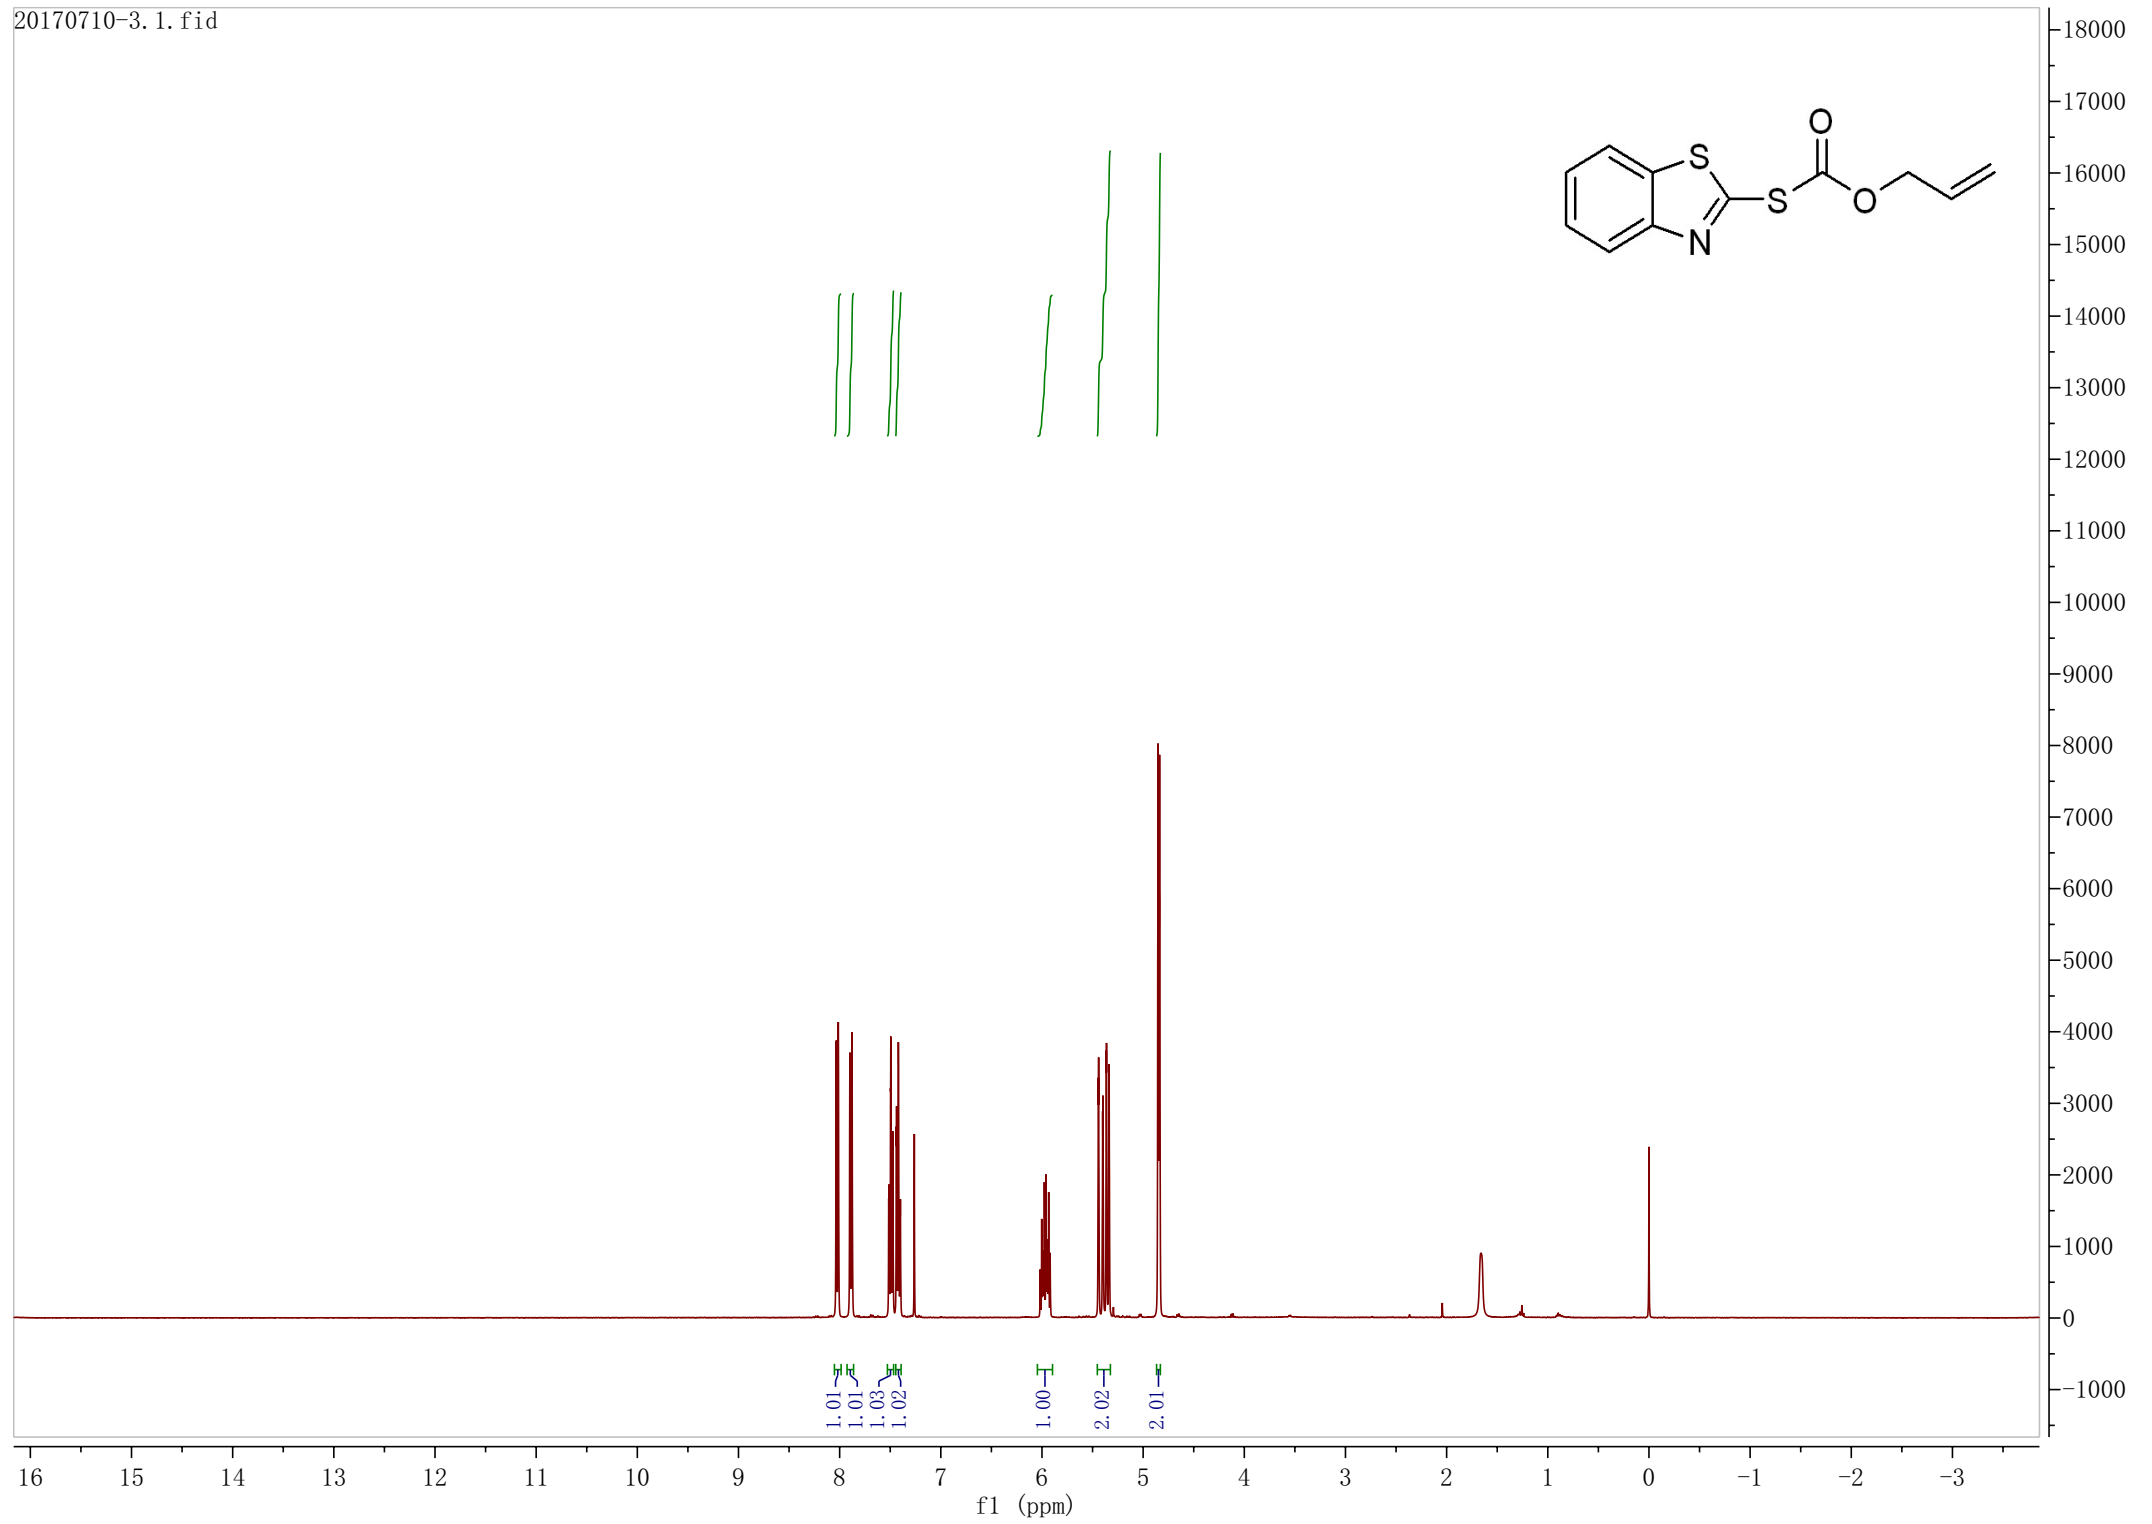

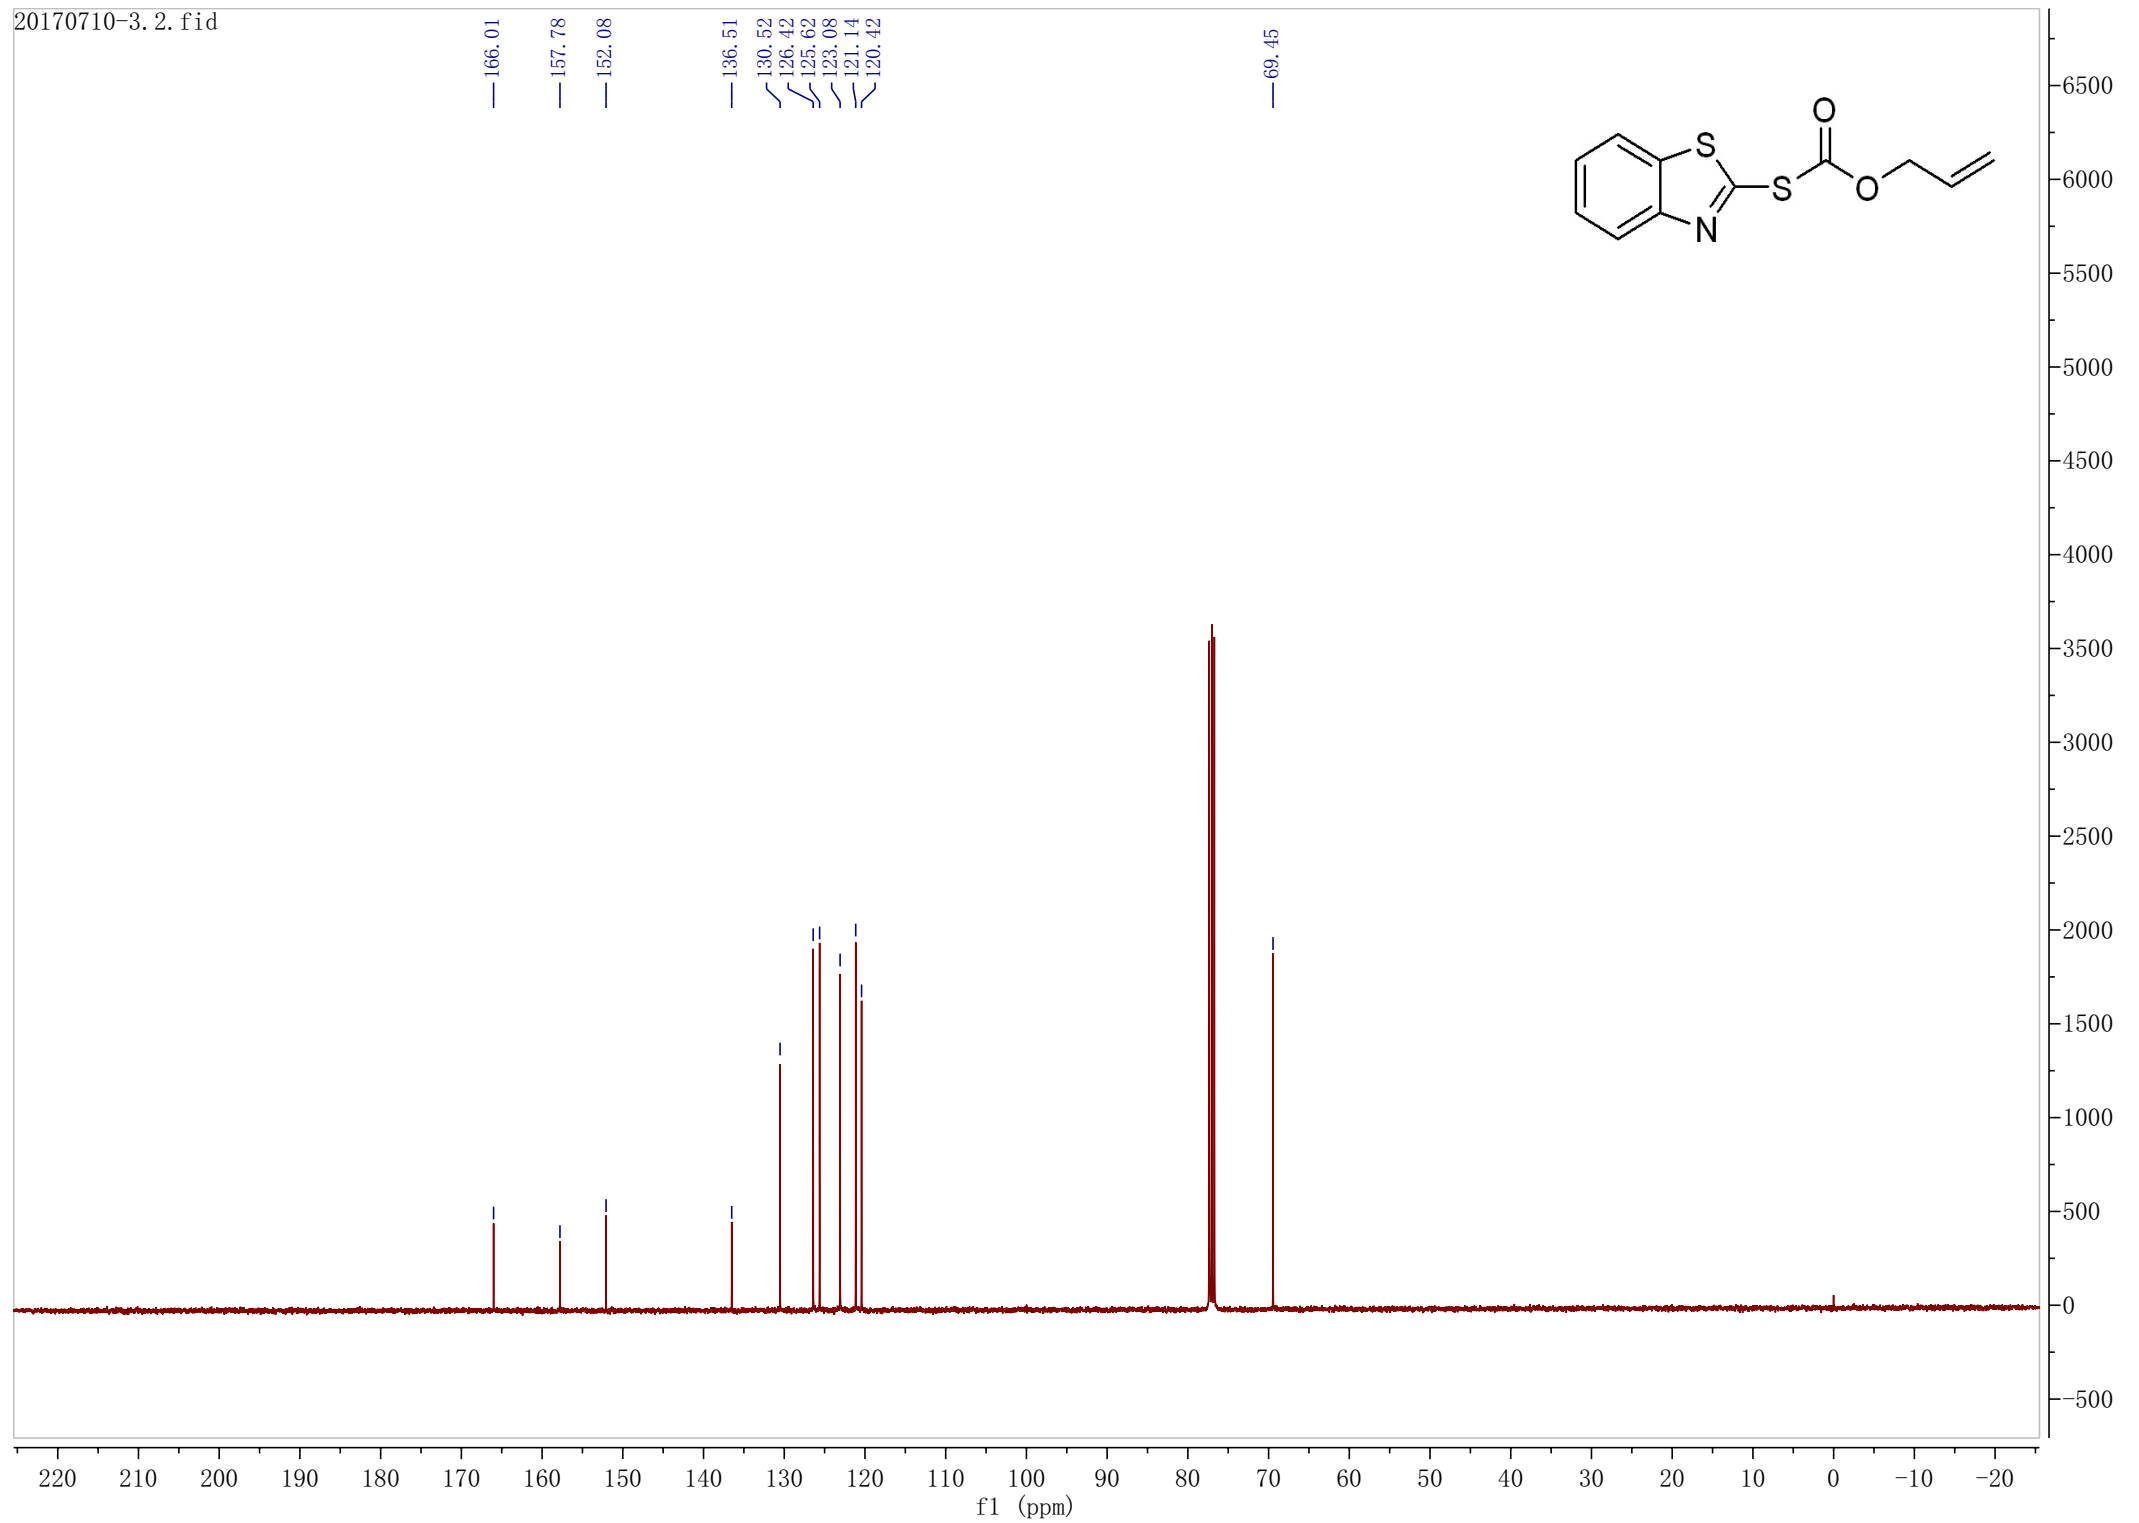

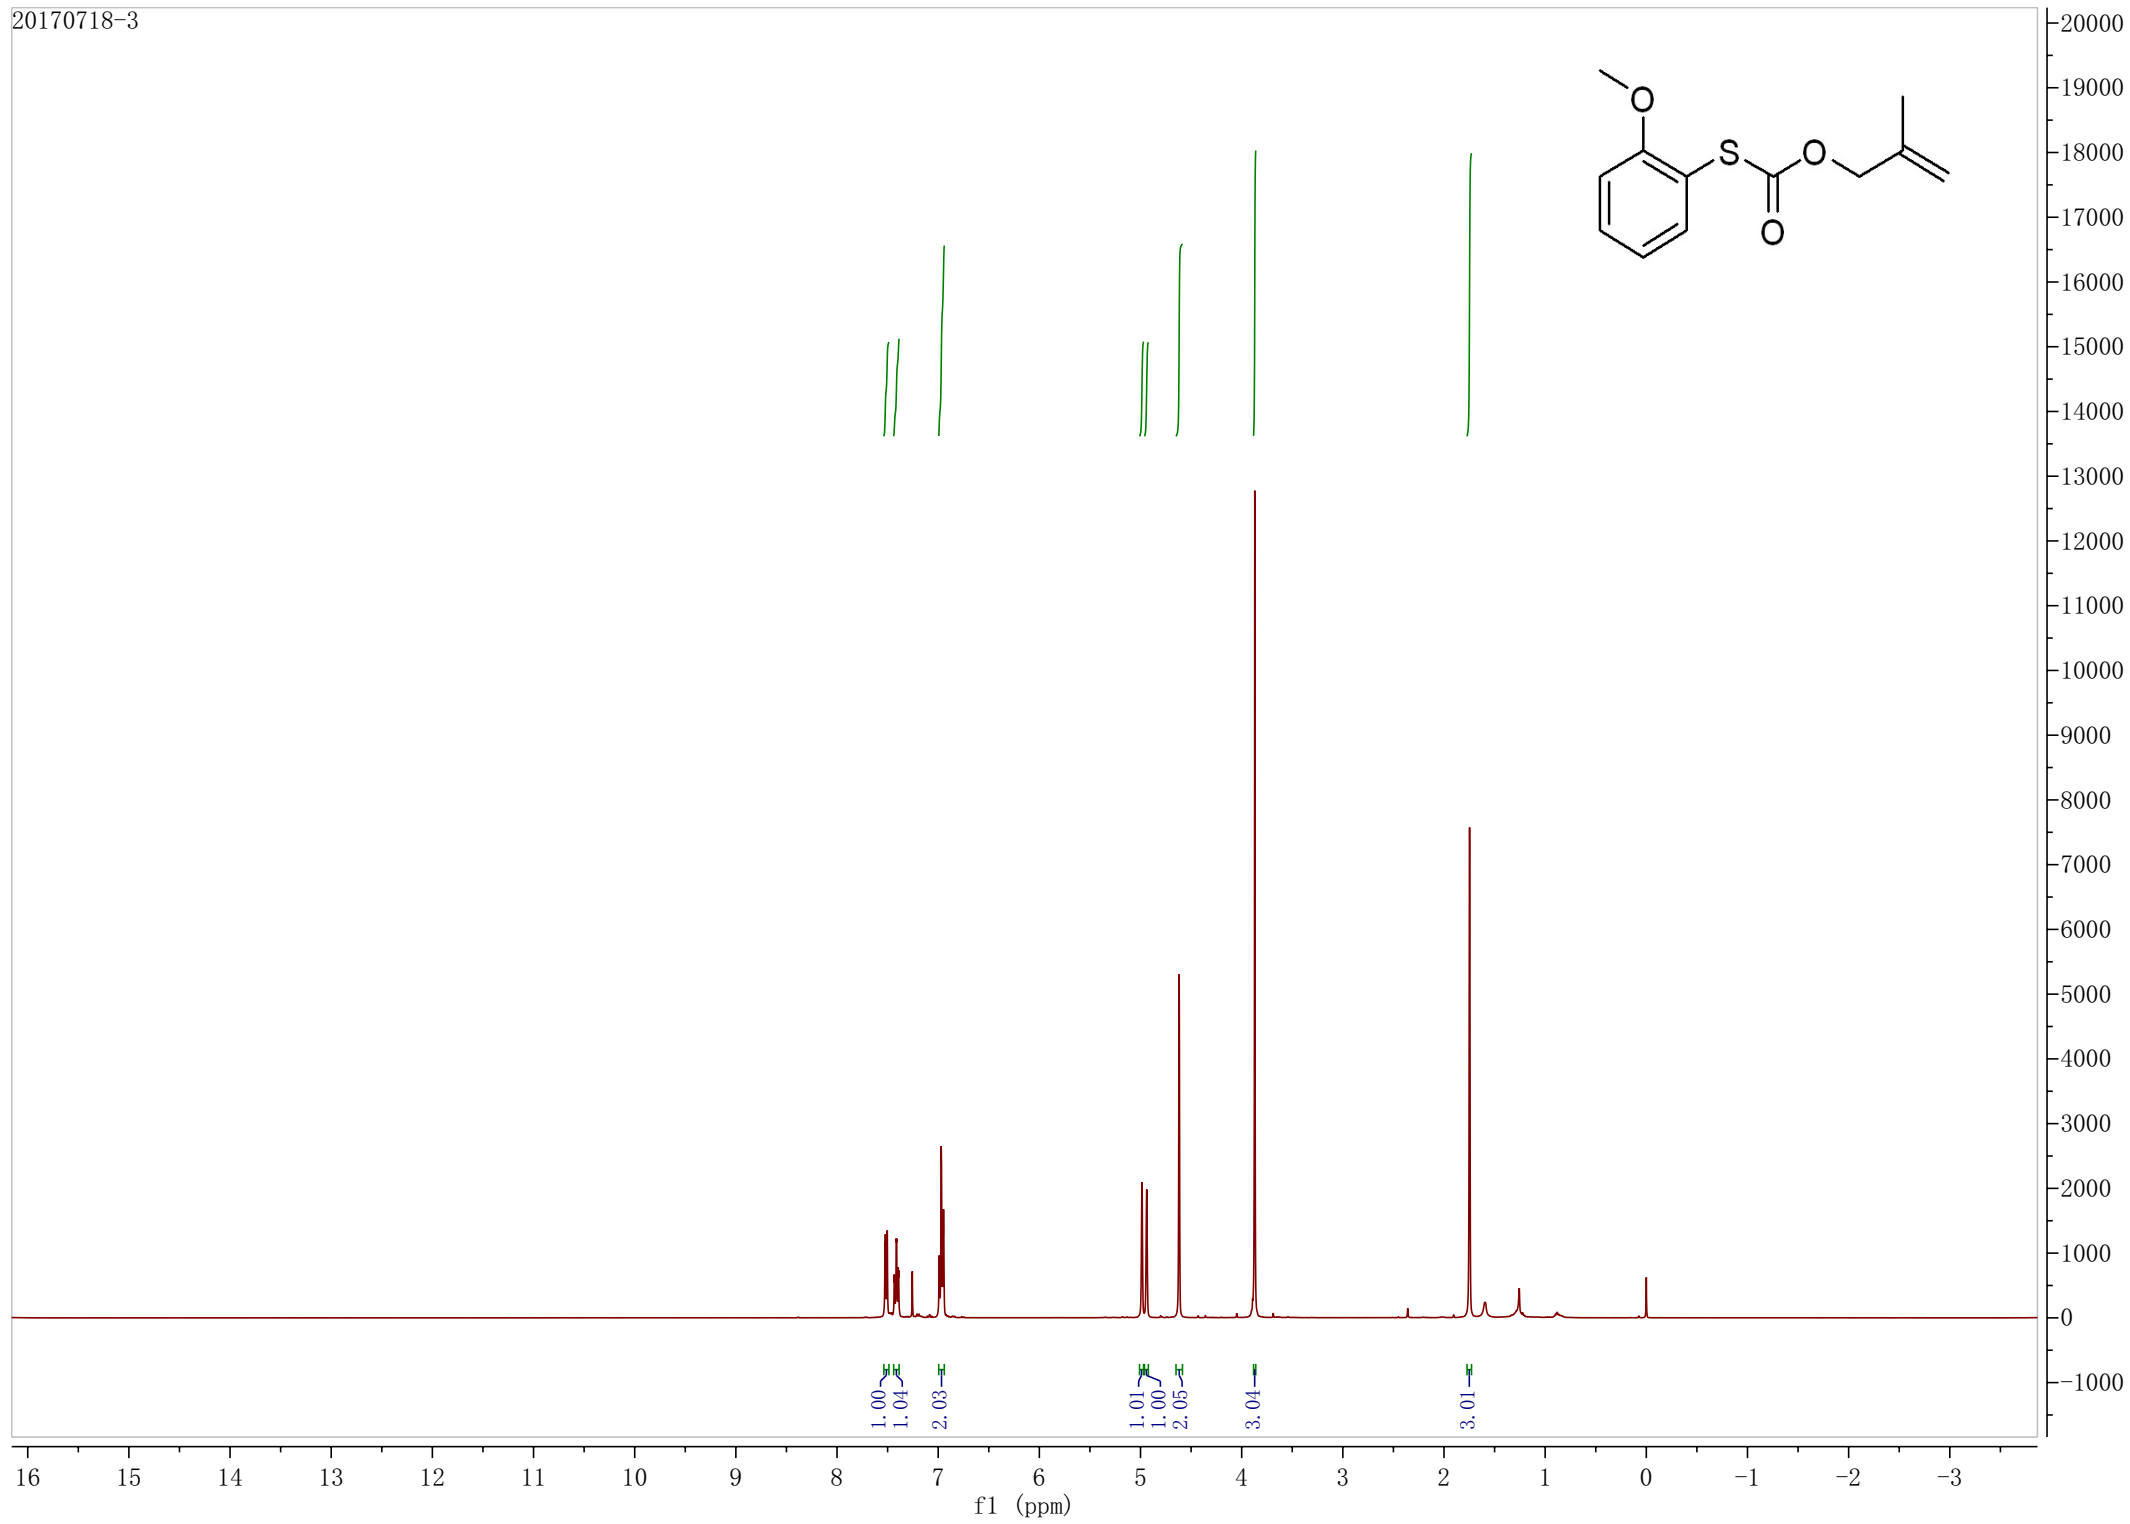



20170719-4

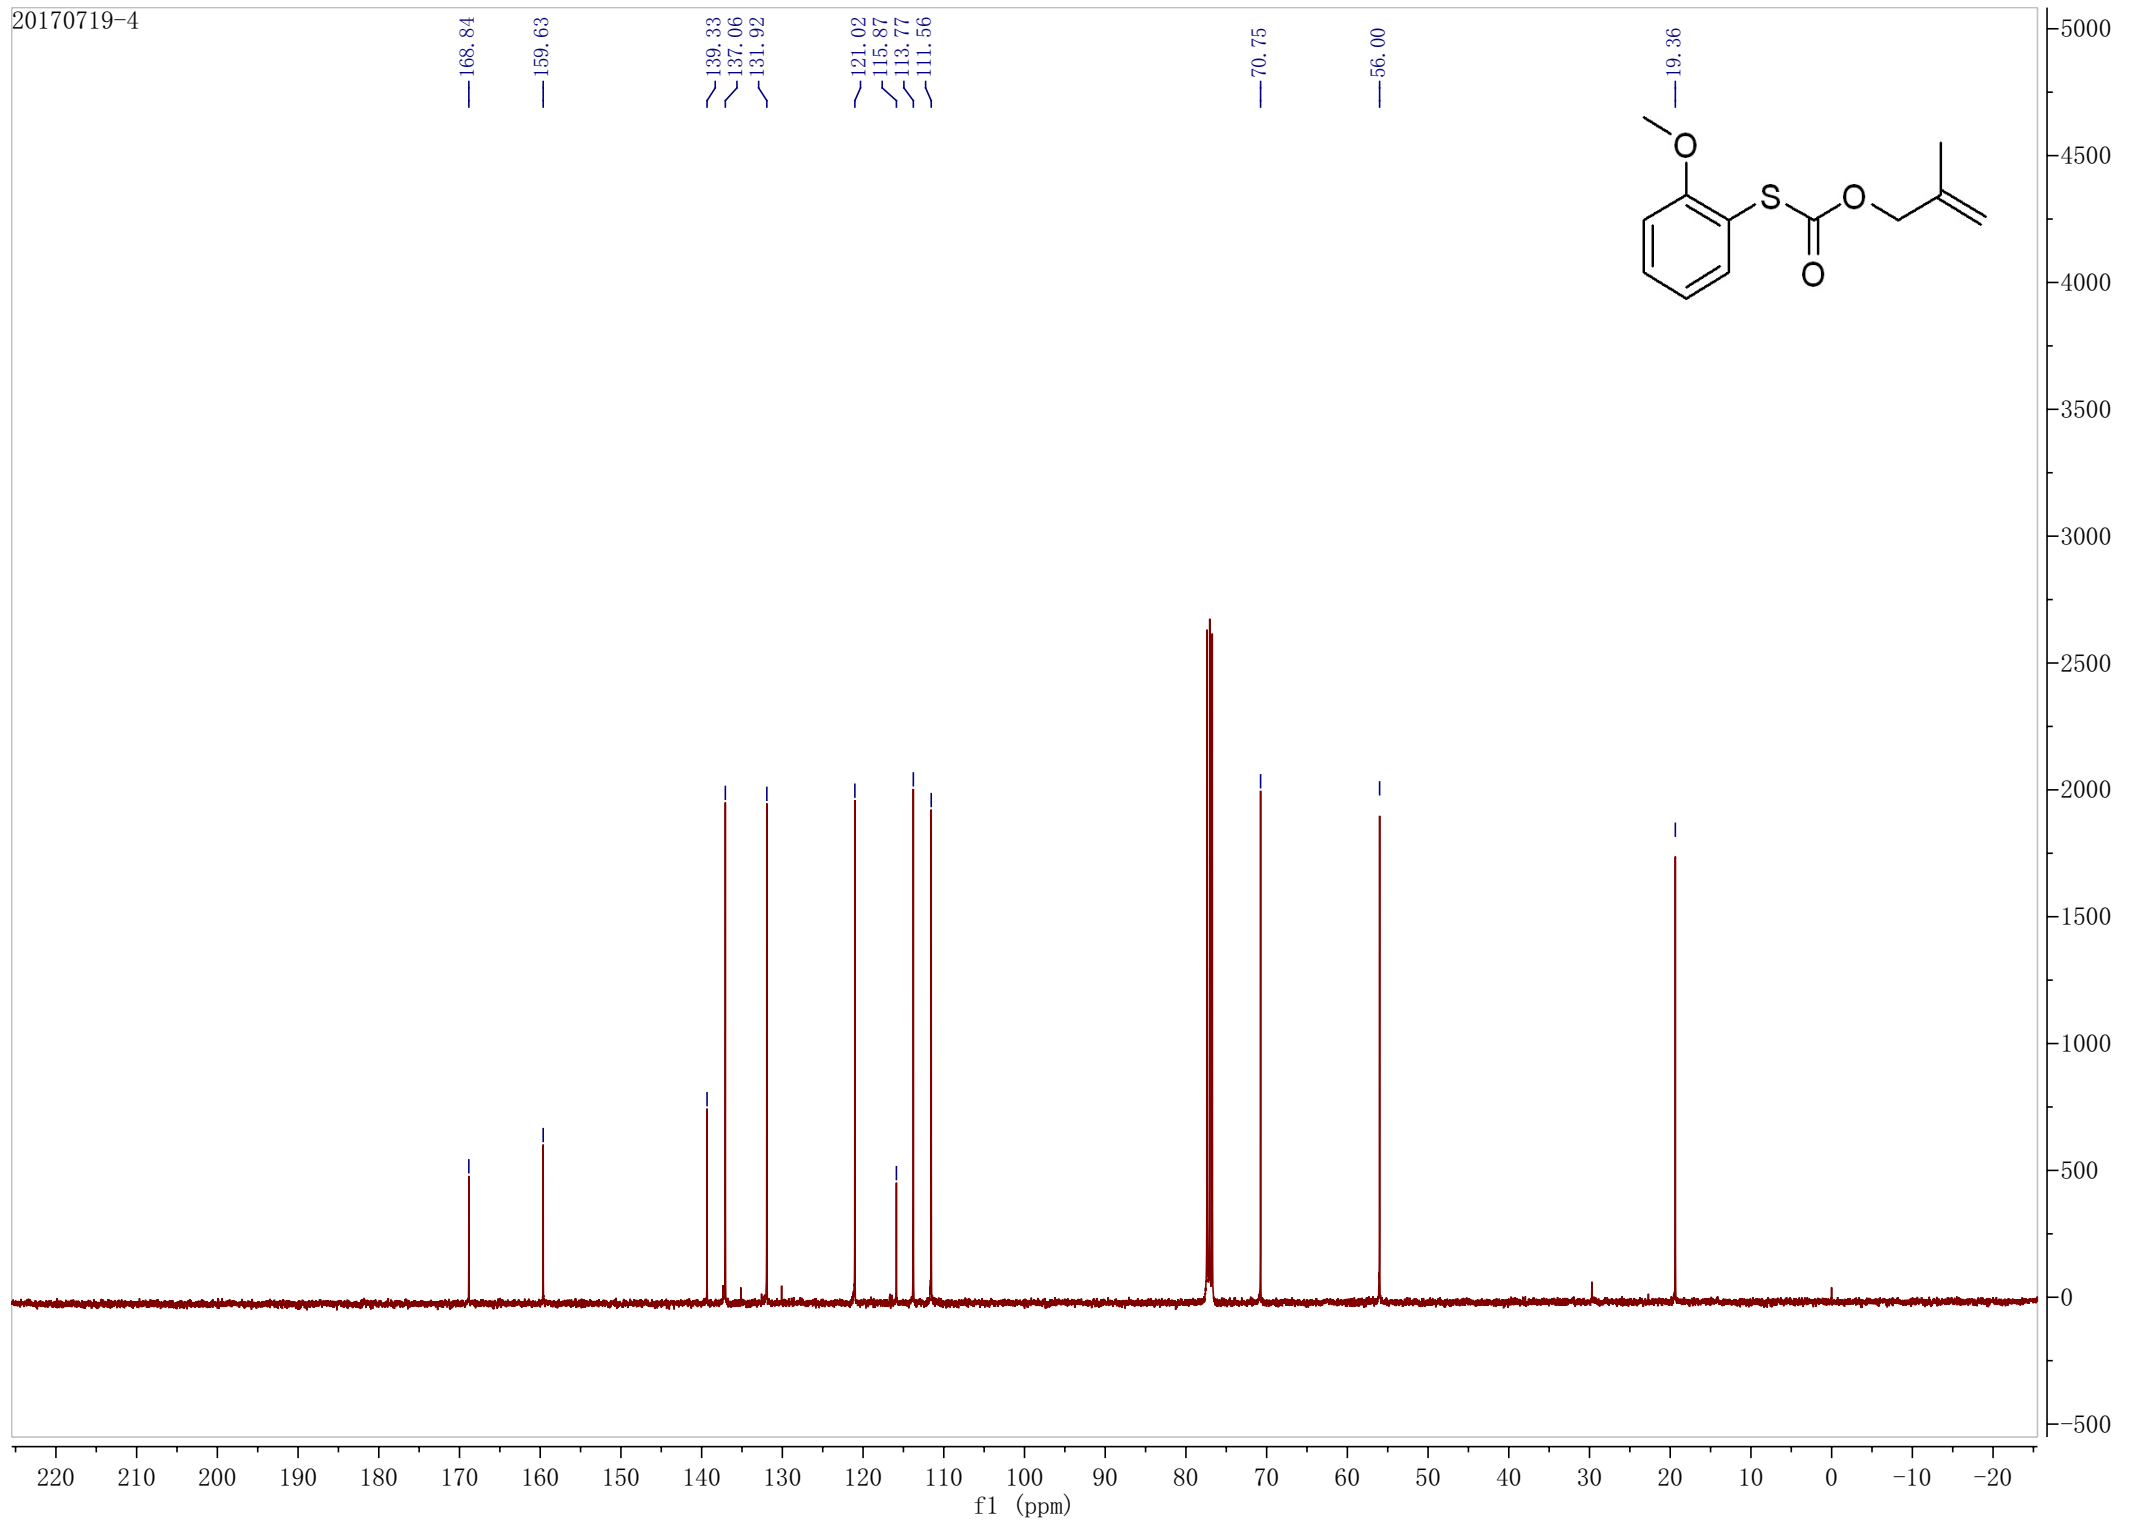

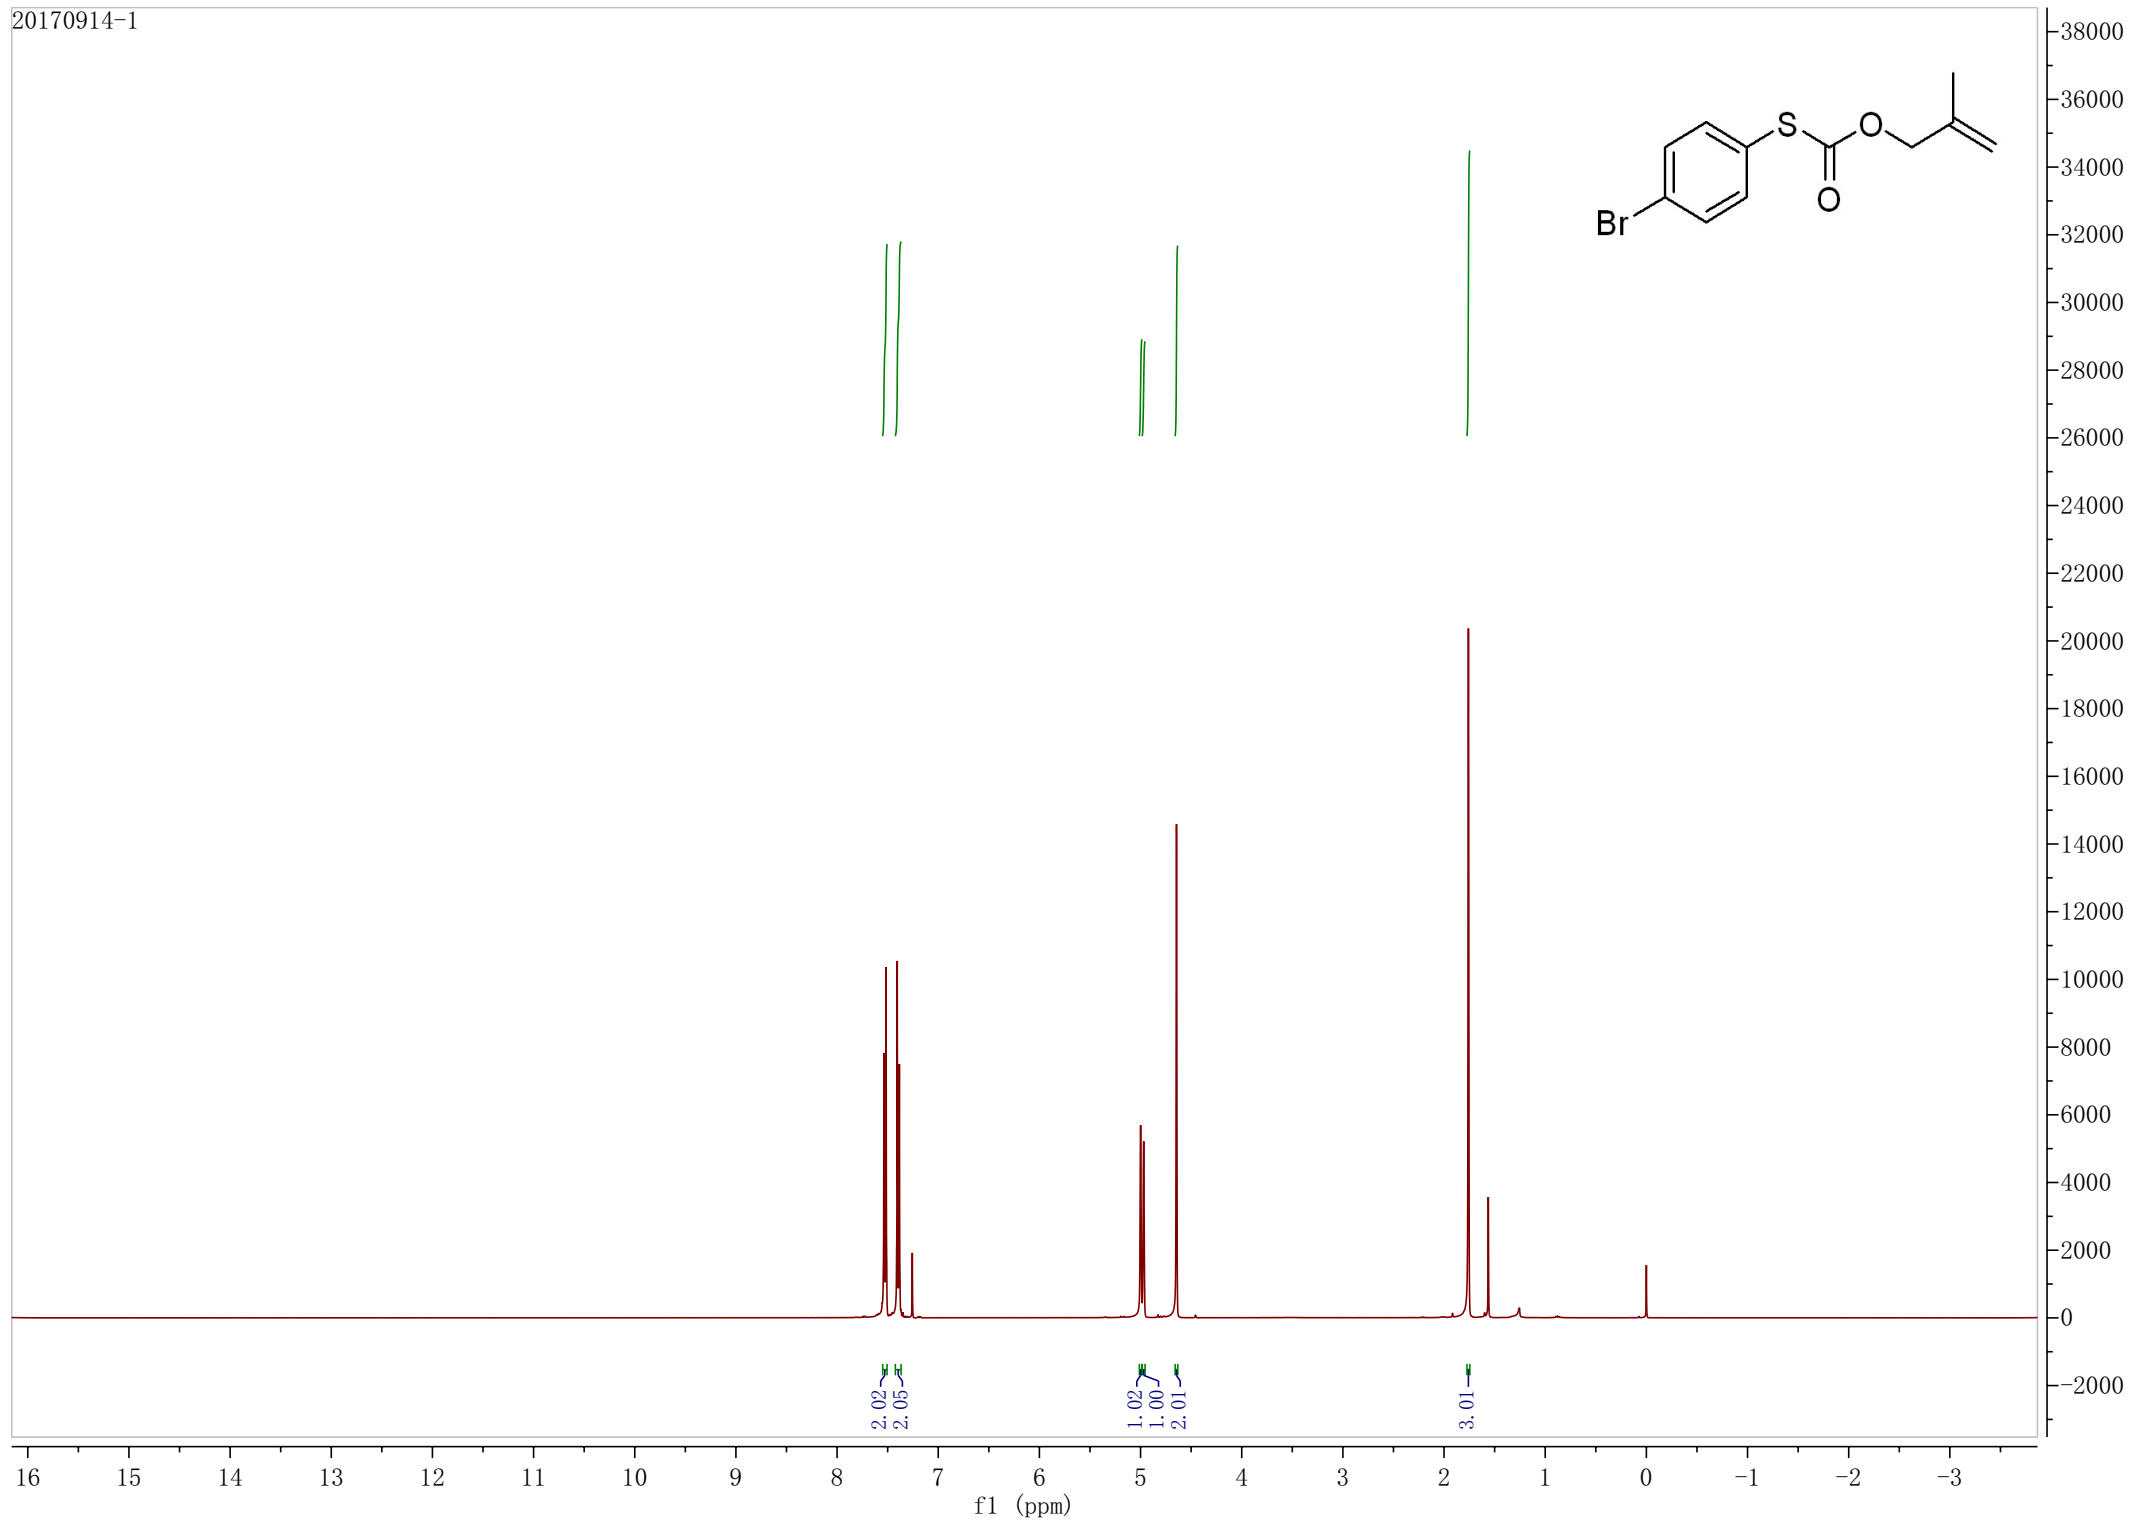

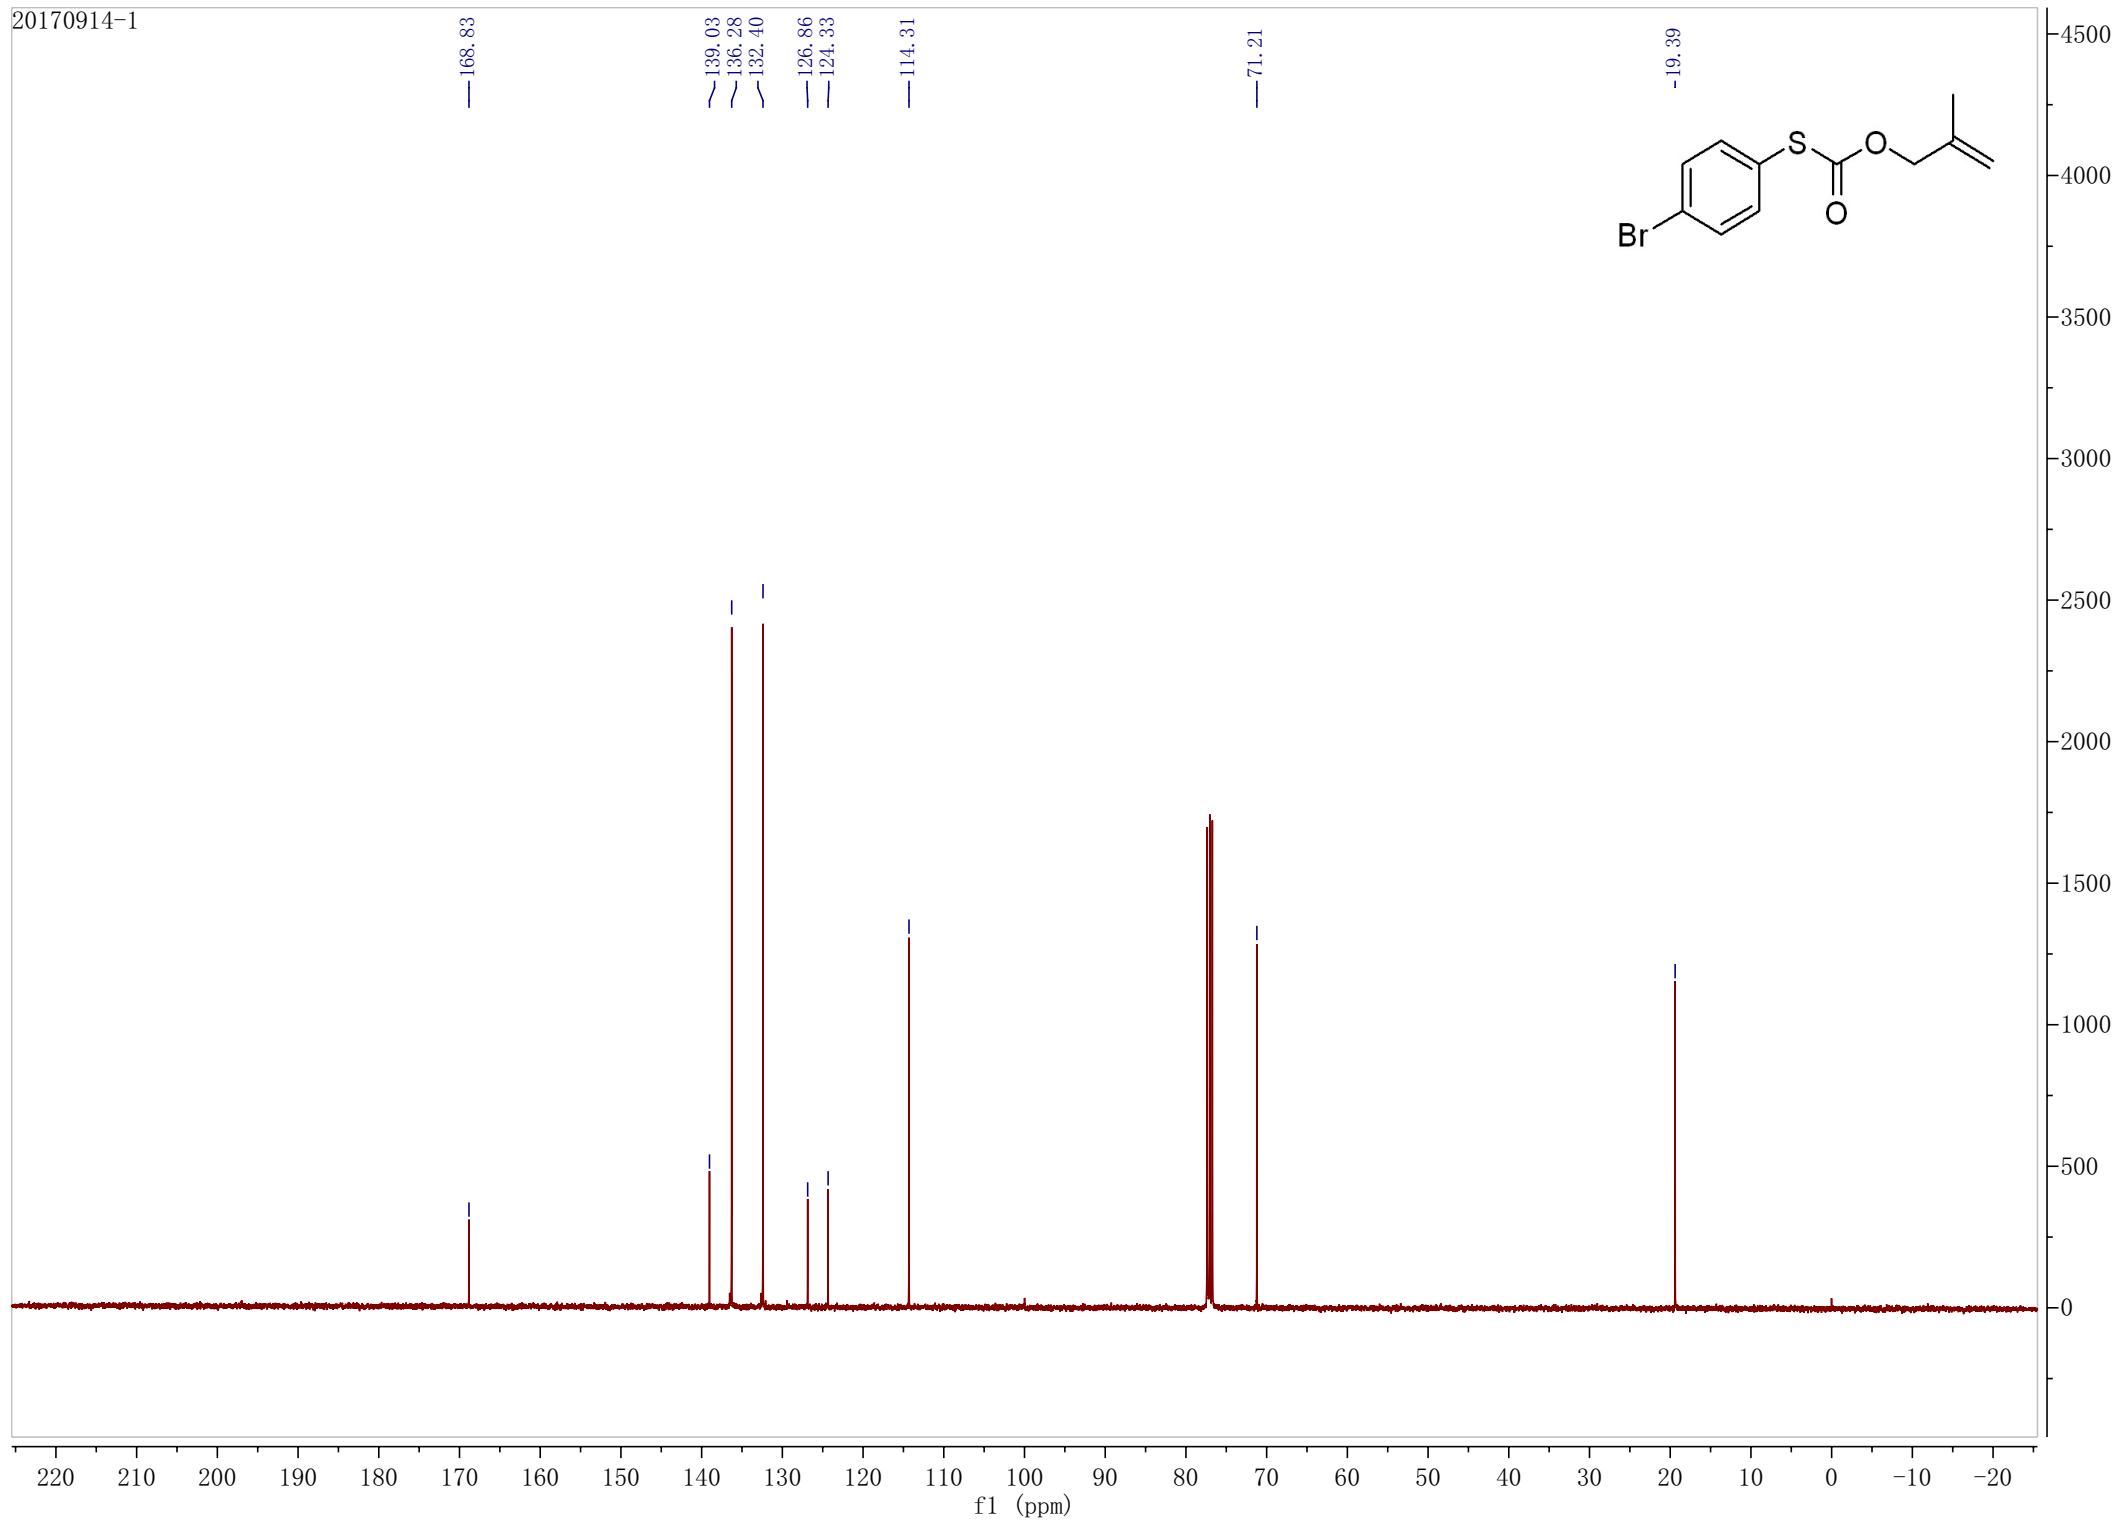

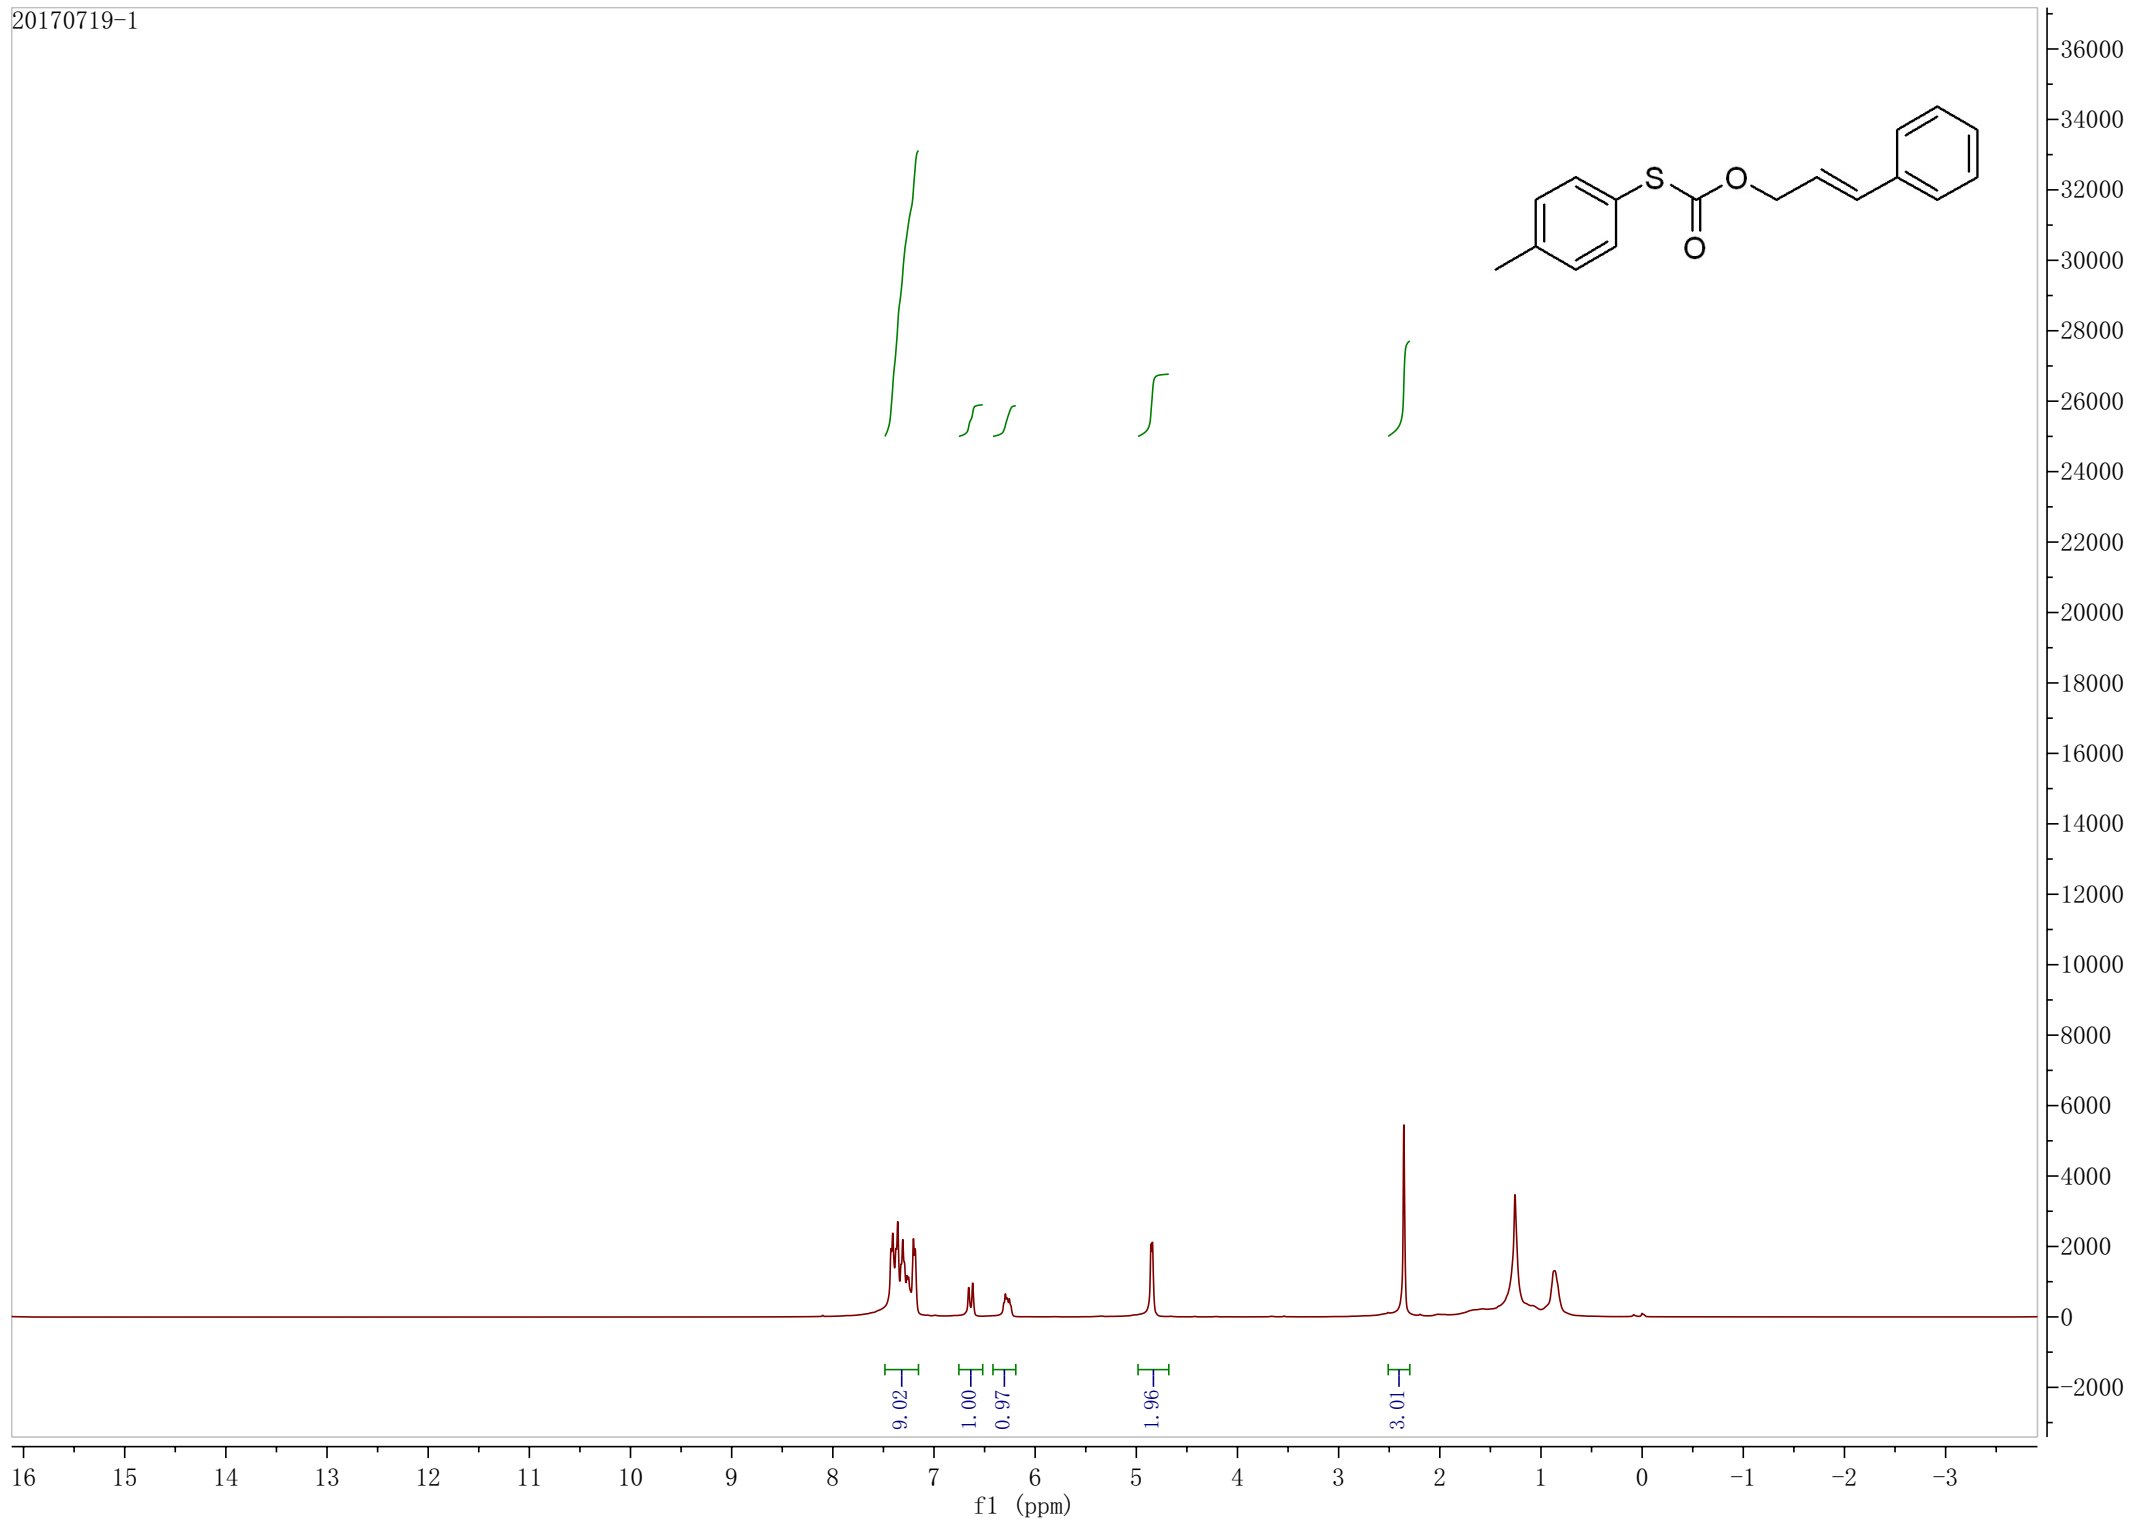

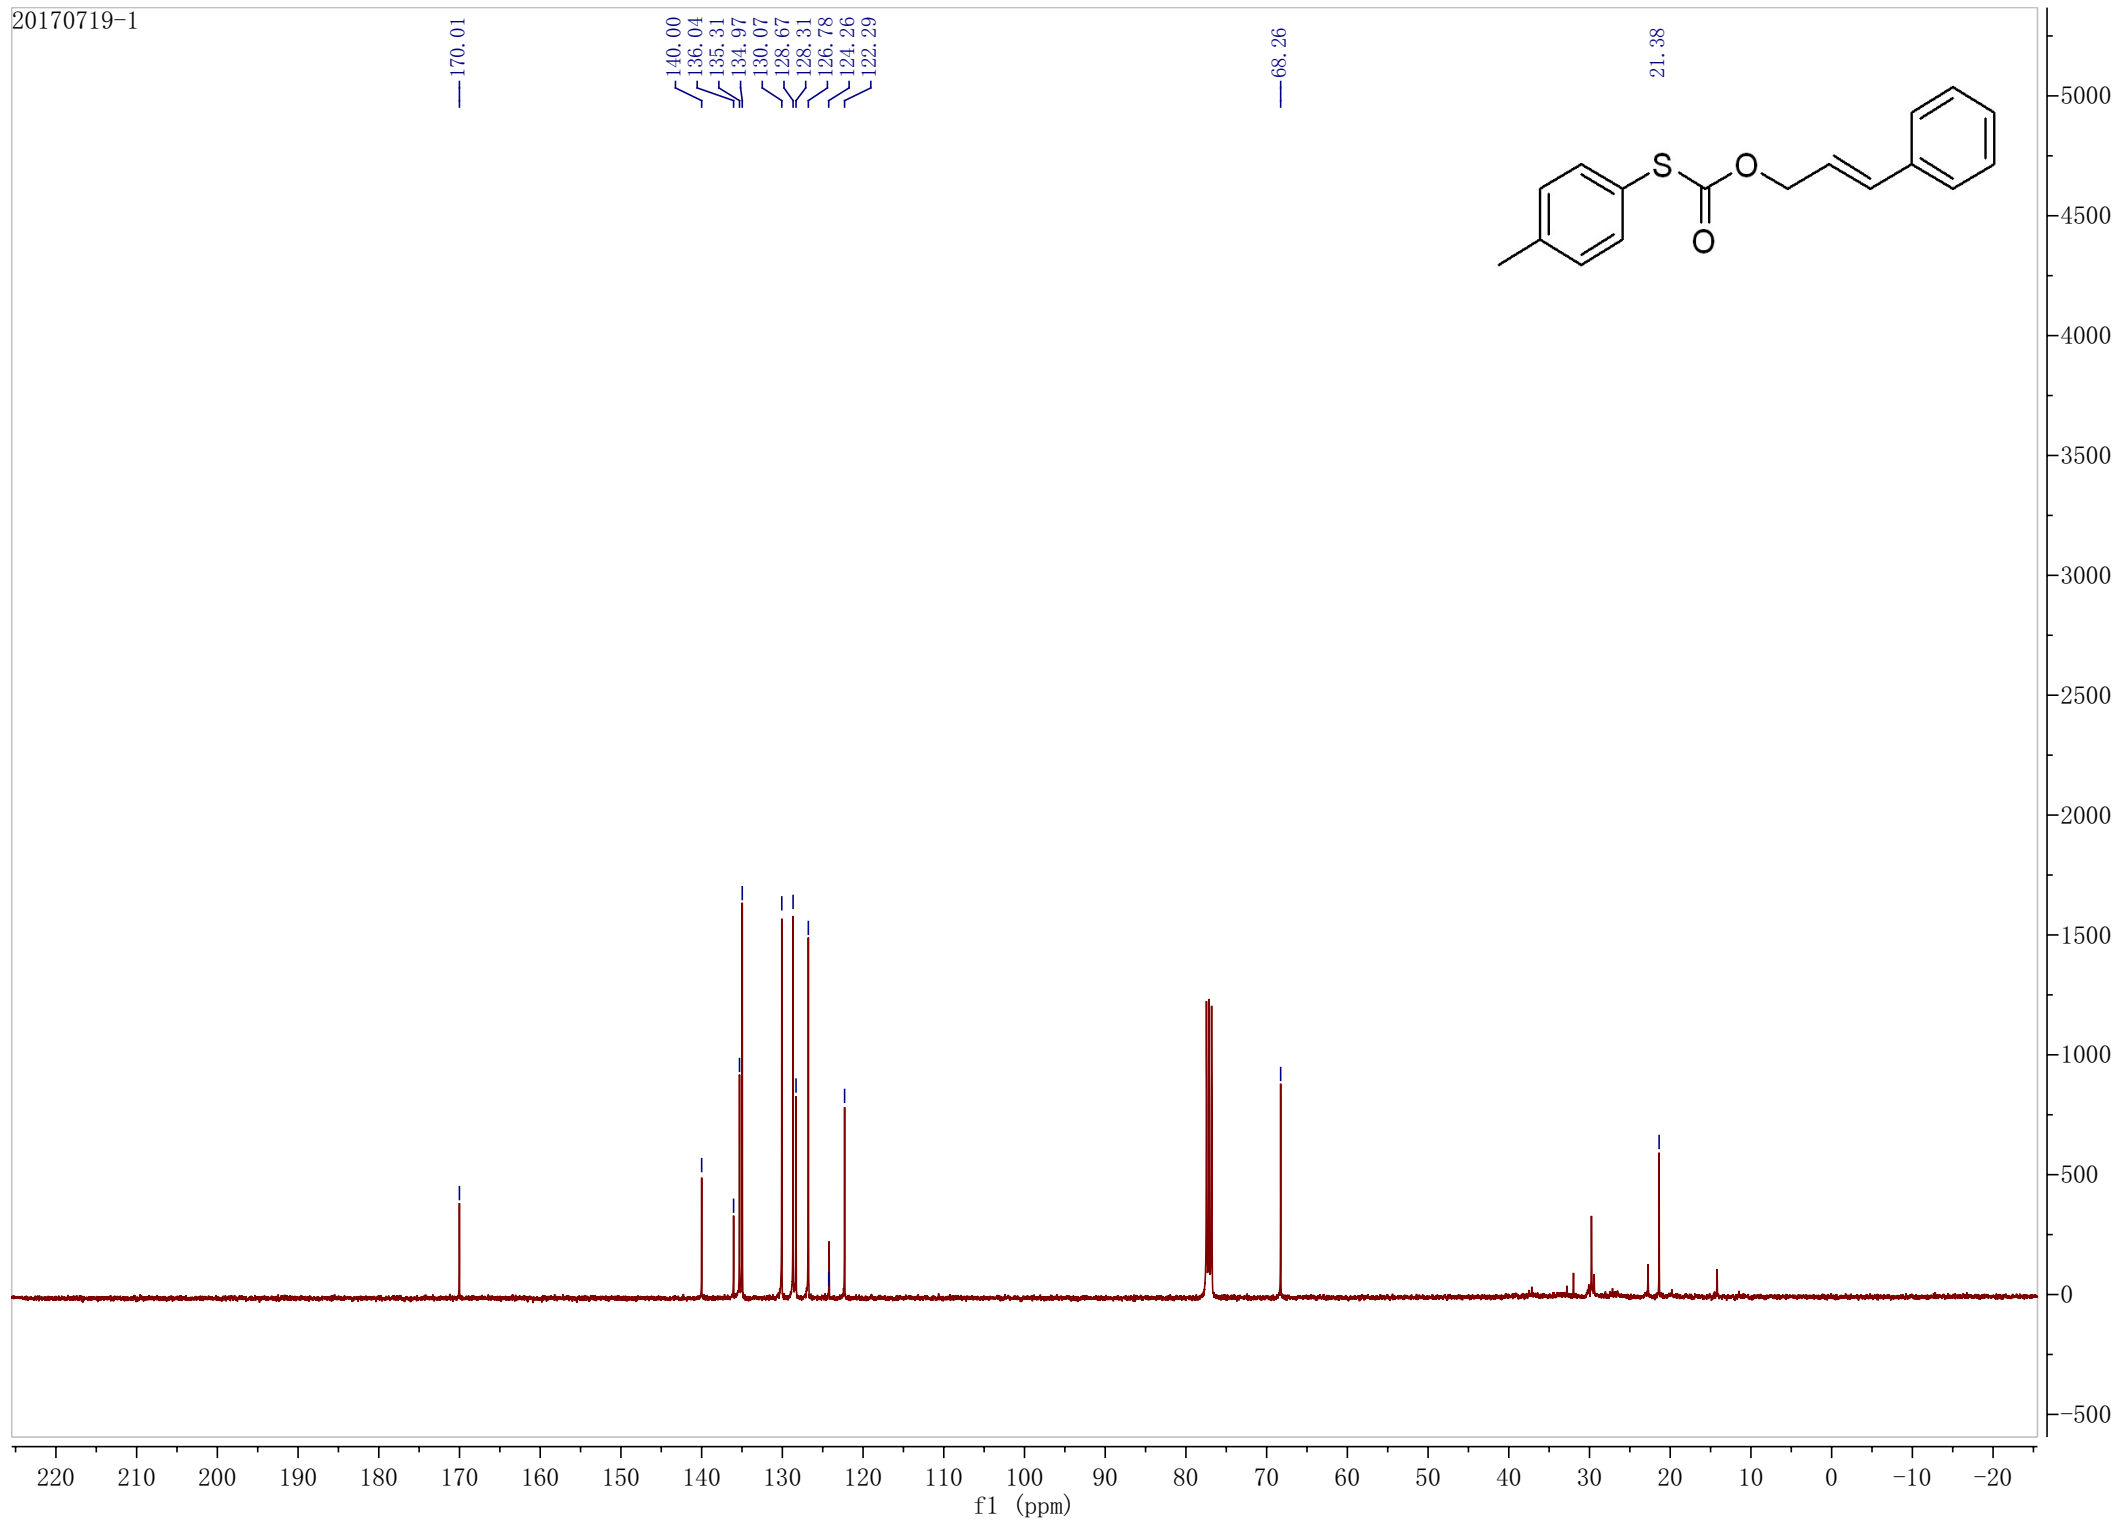

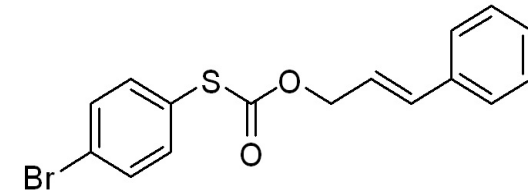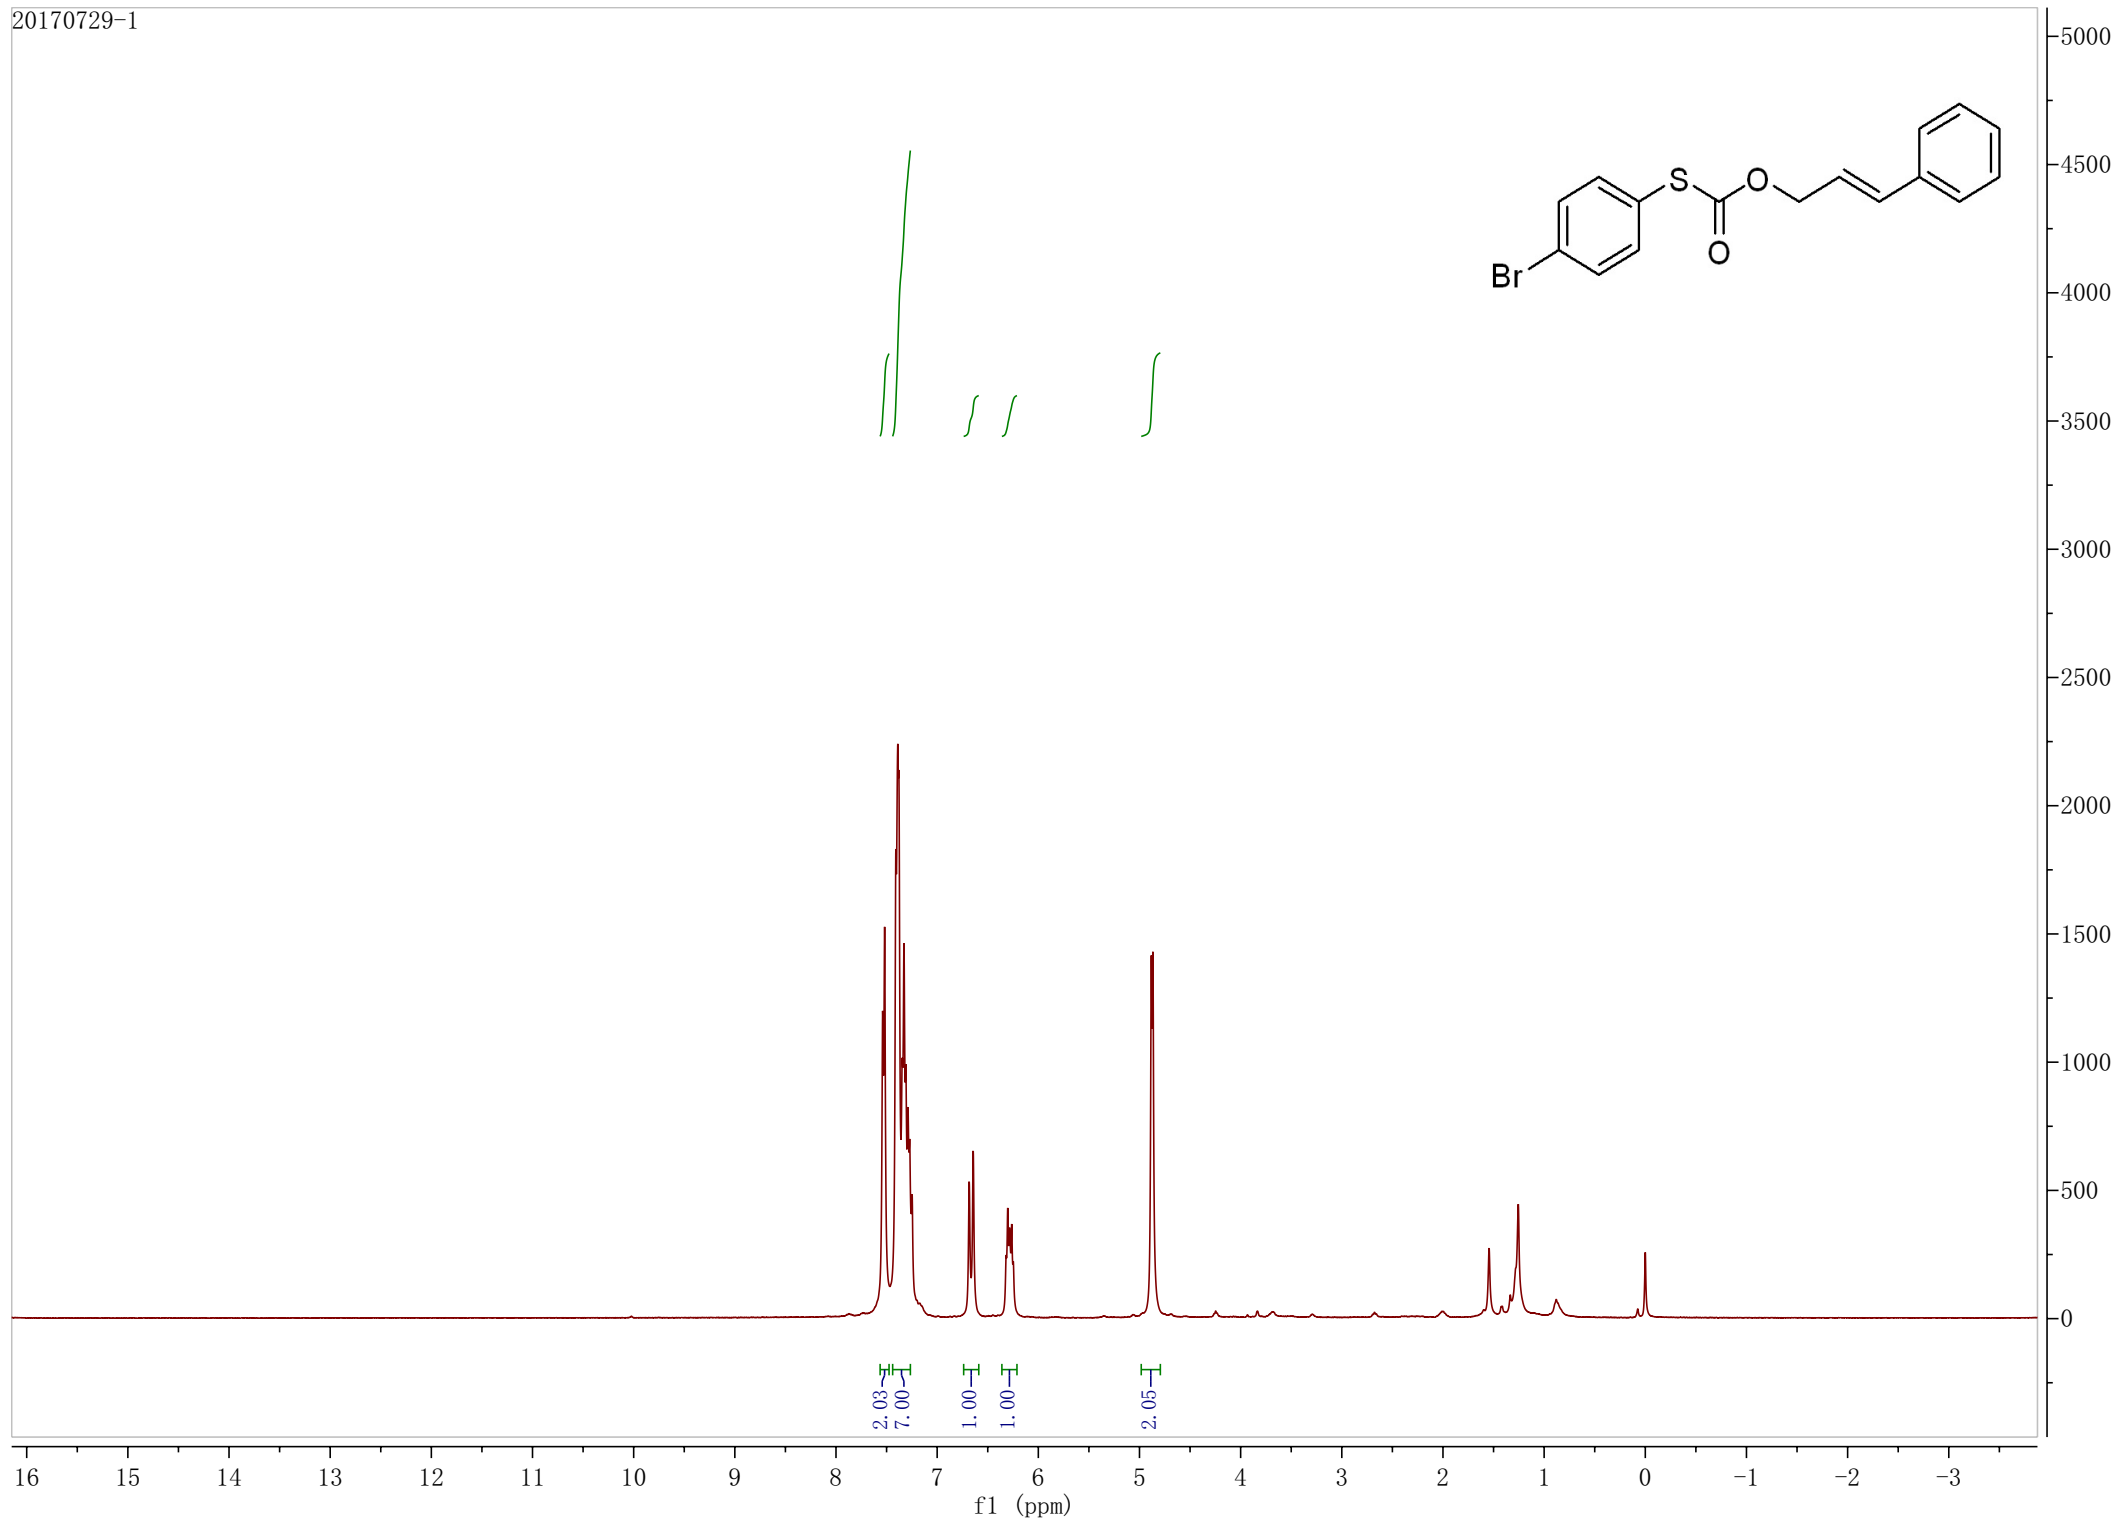

20170904-2

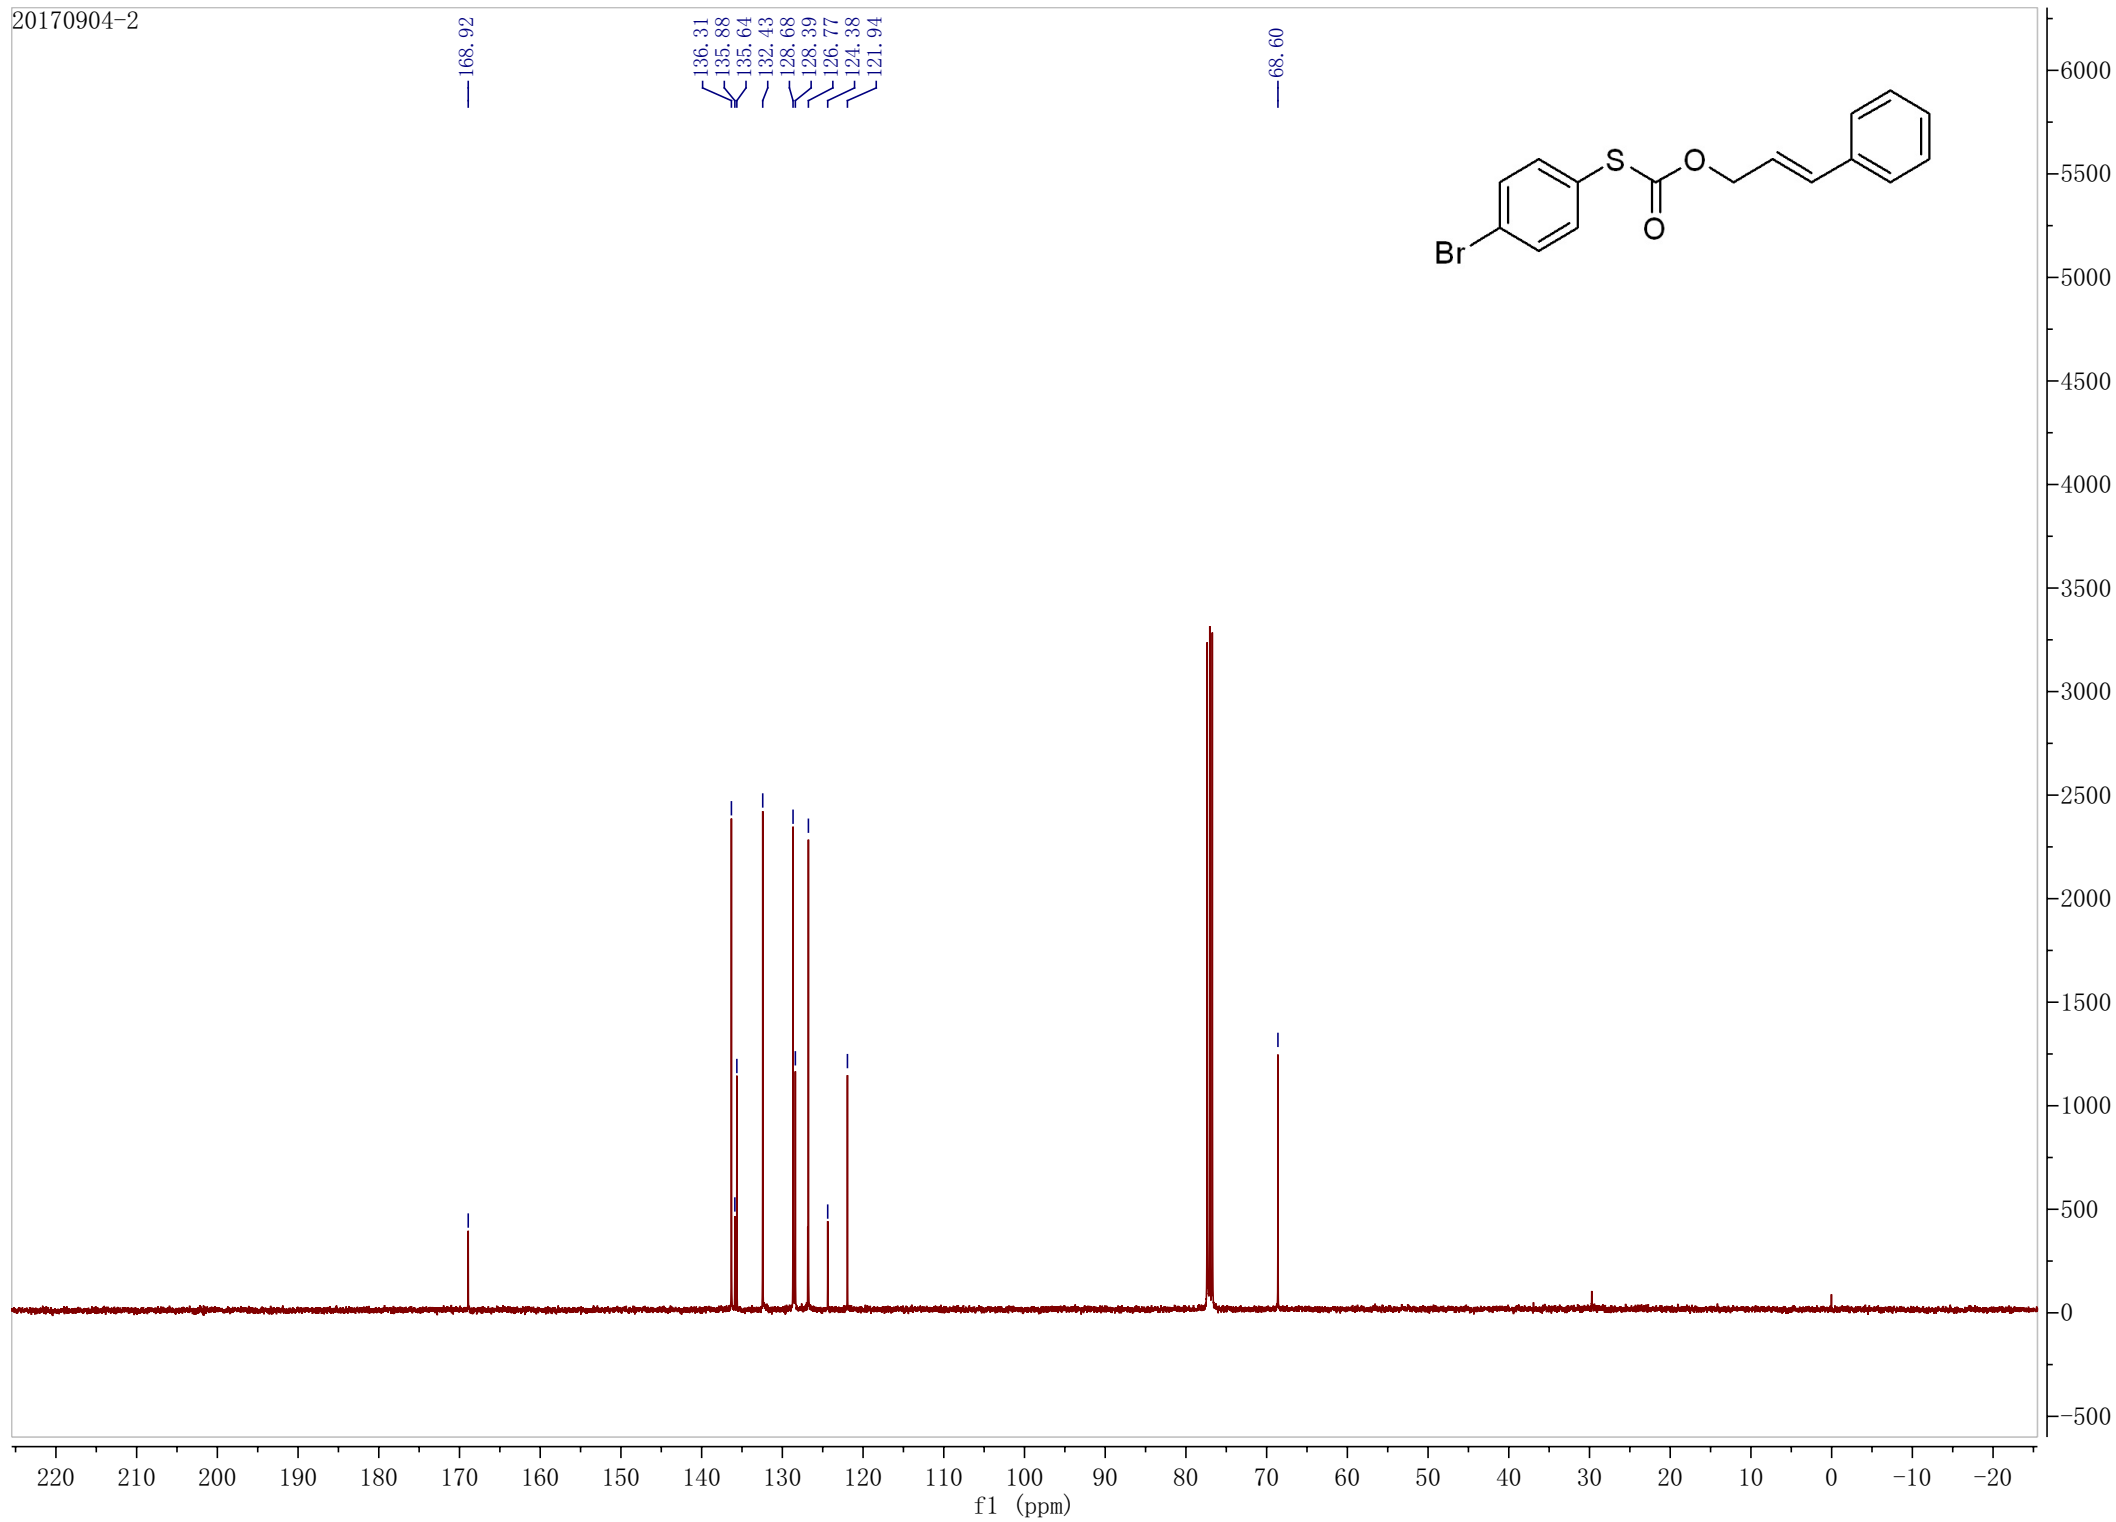

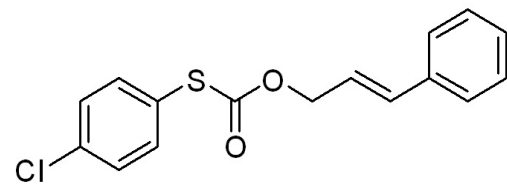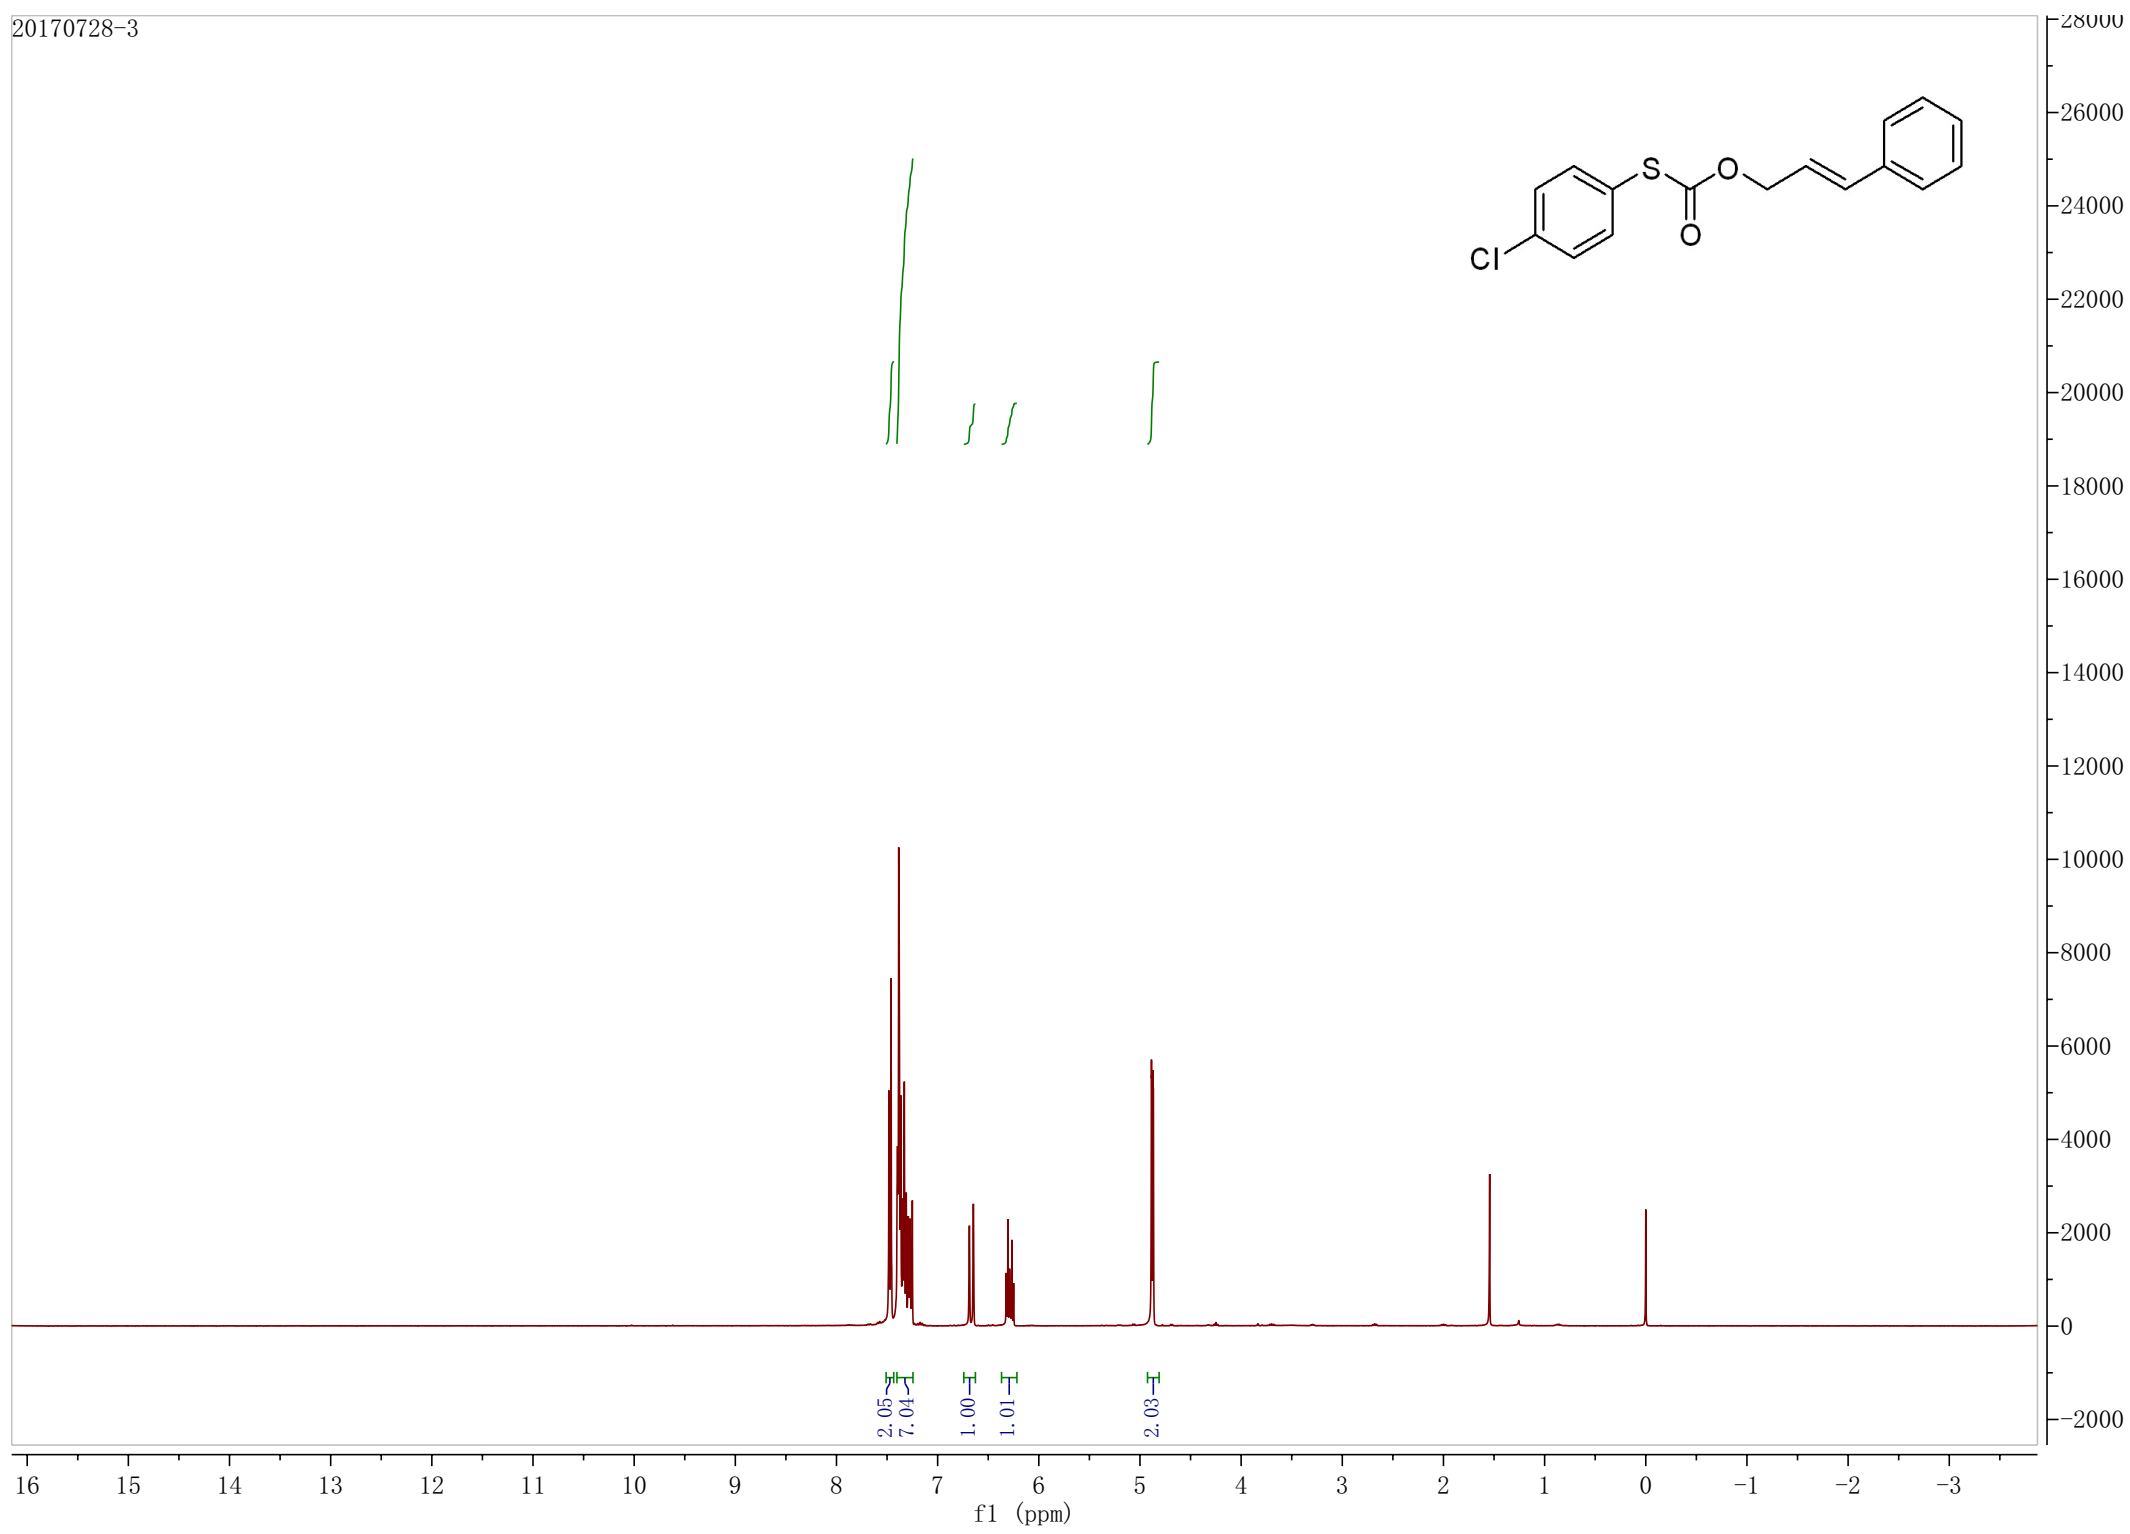



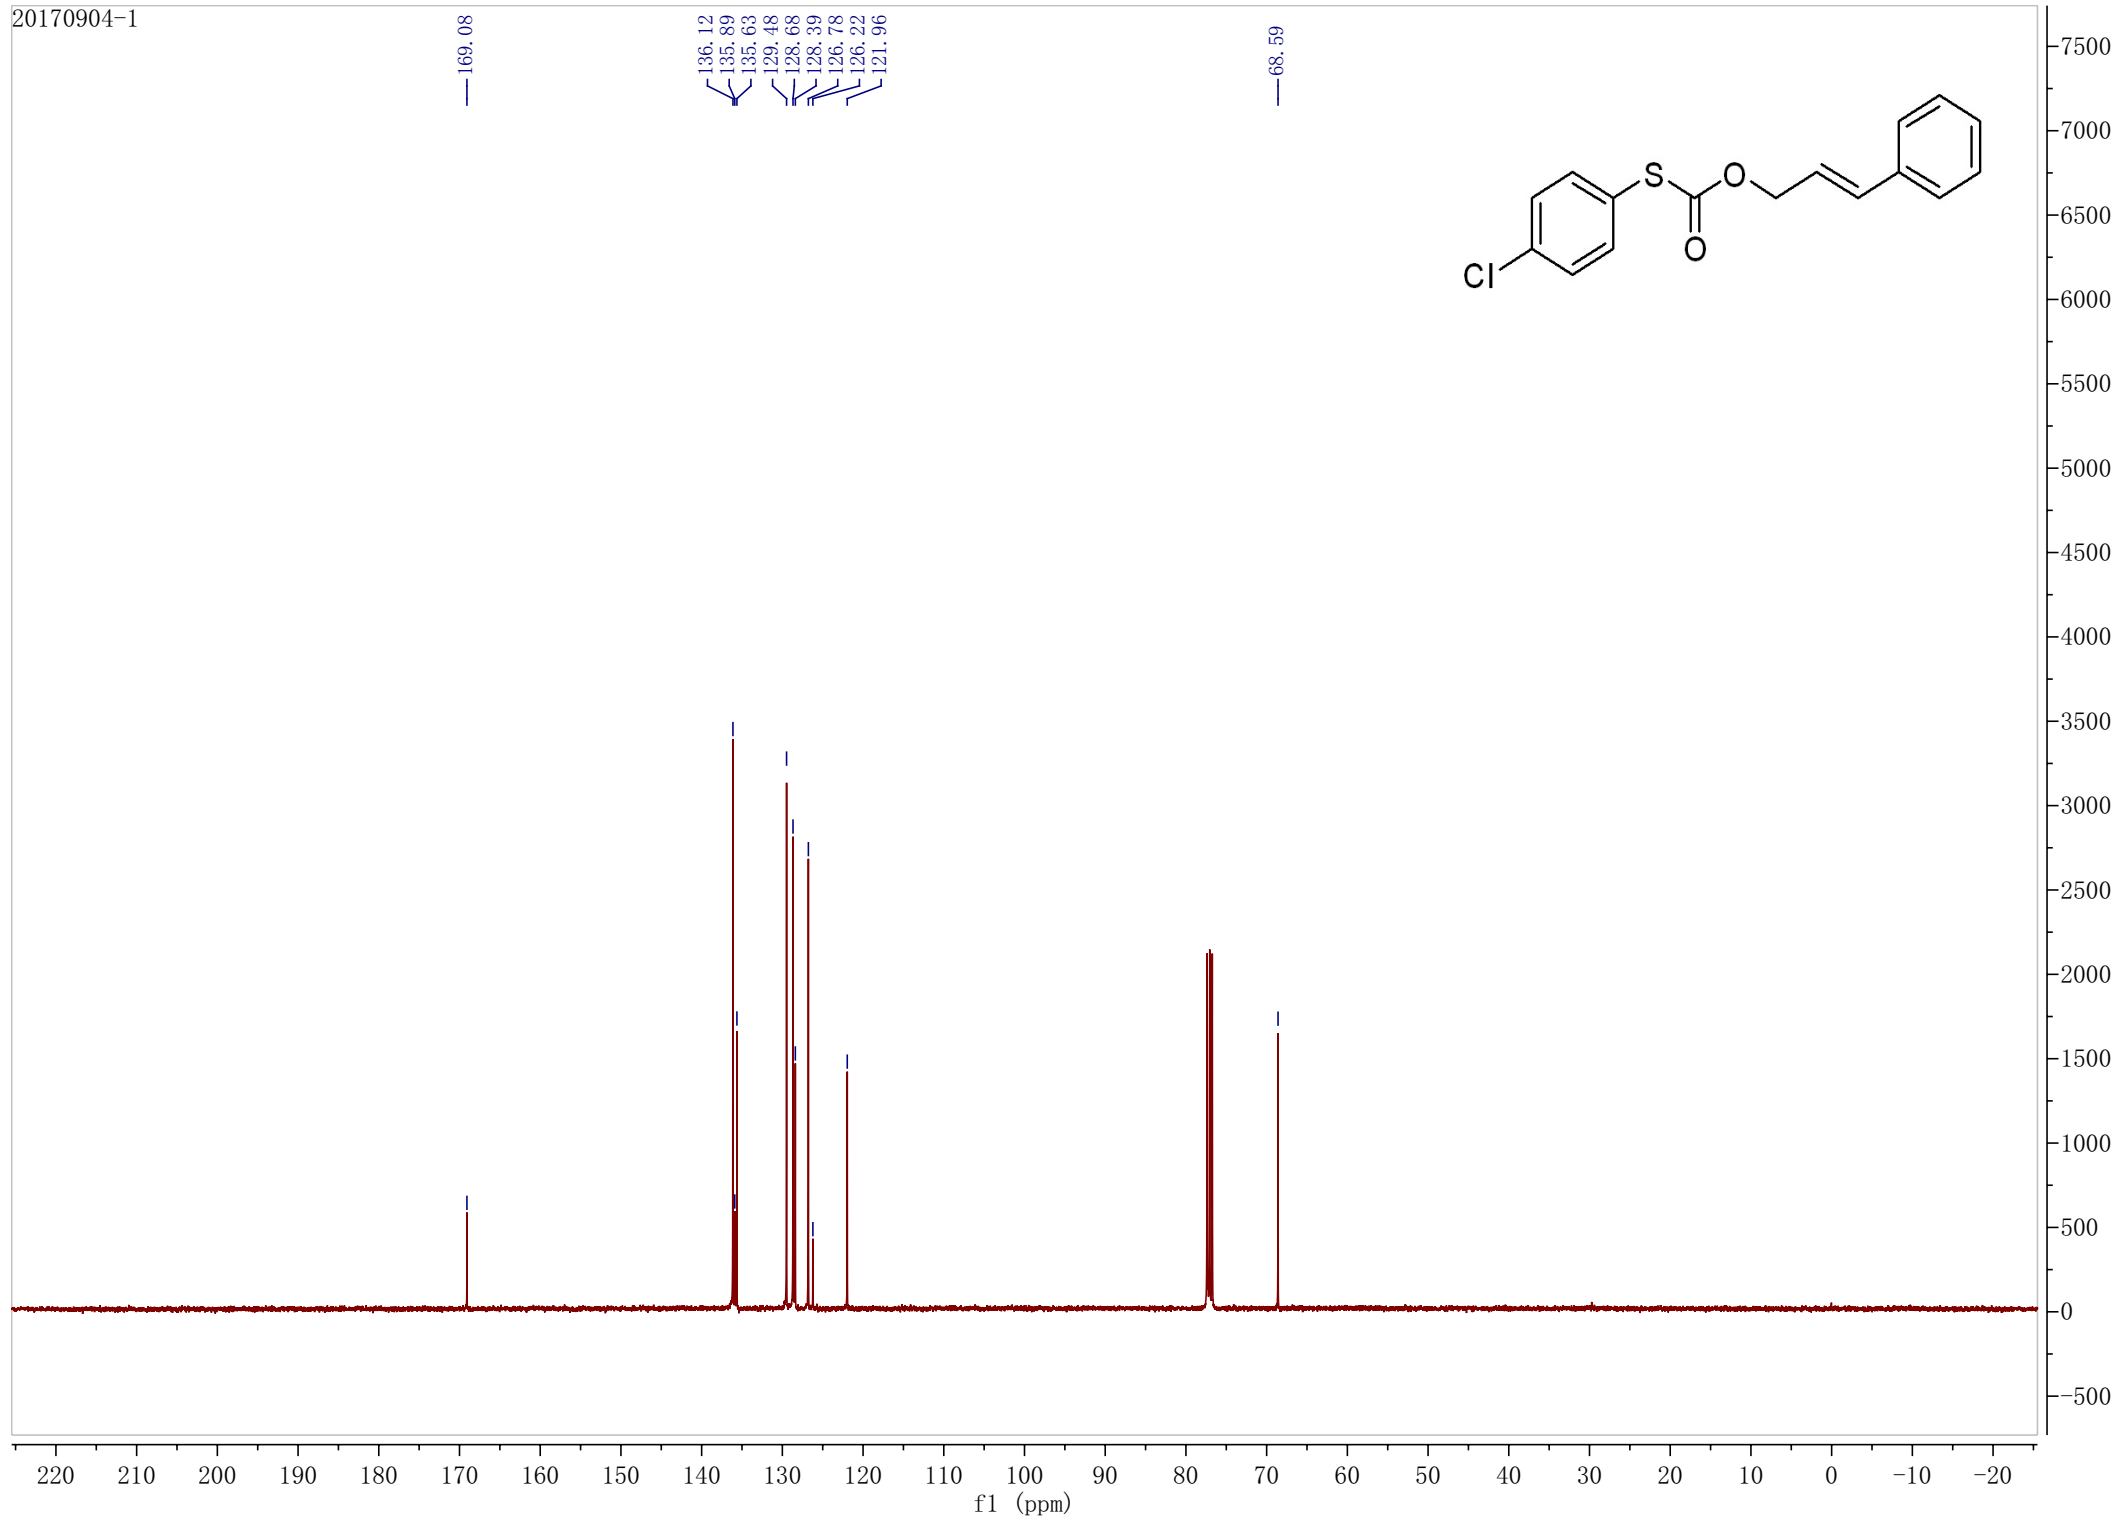

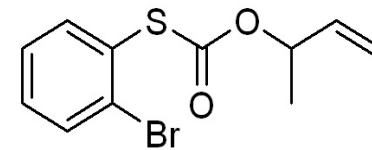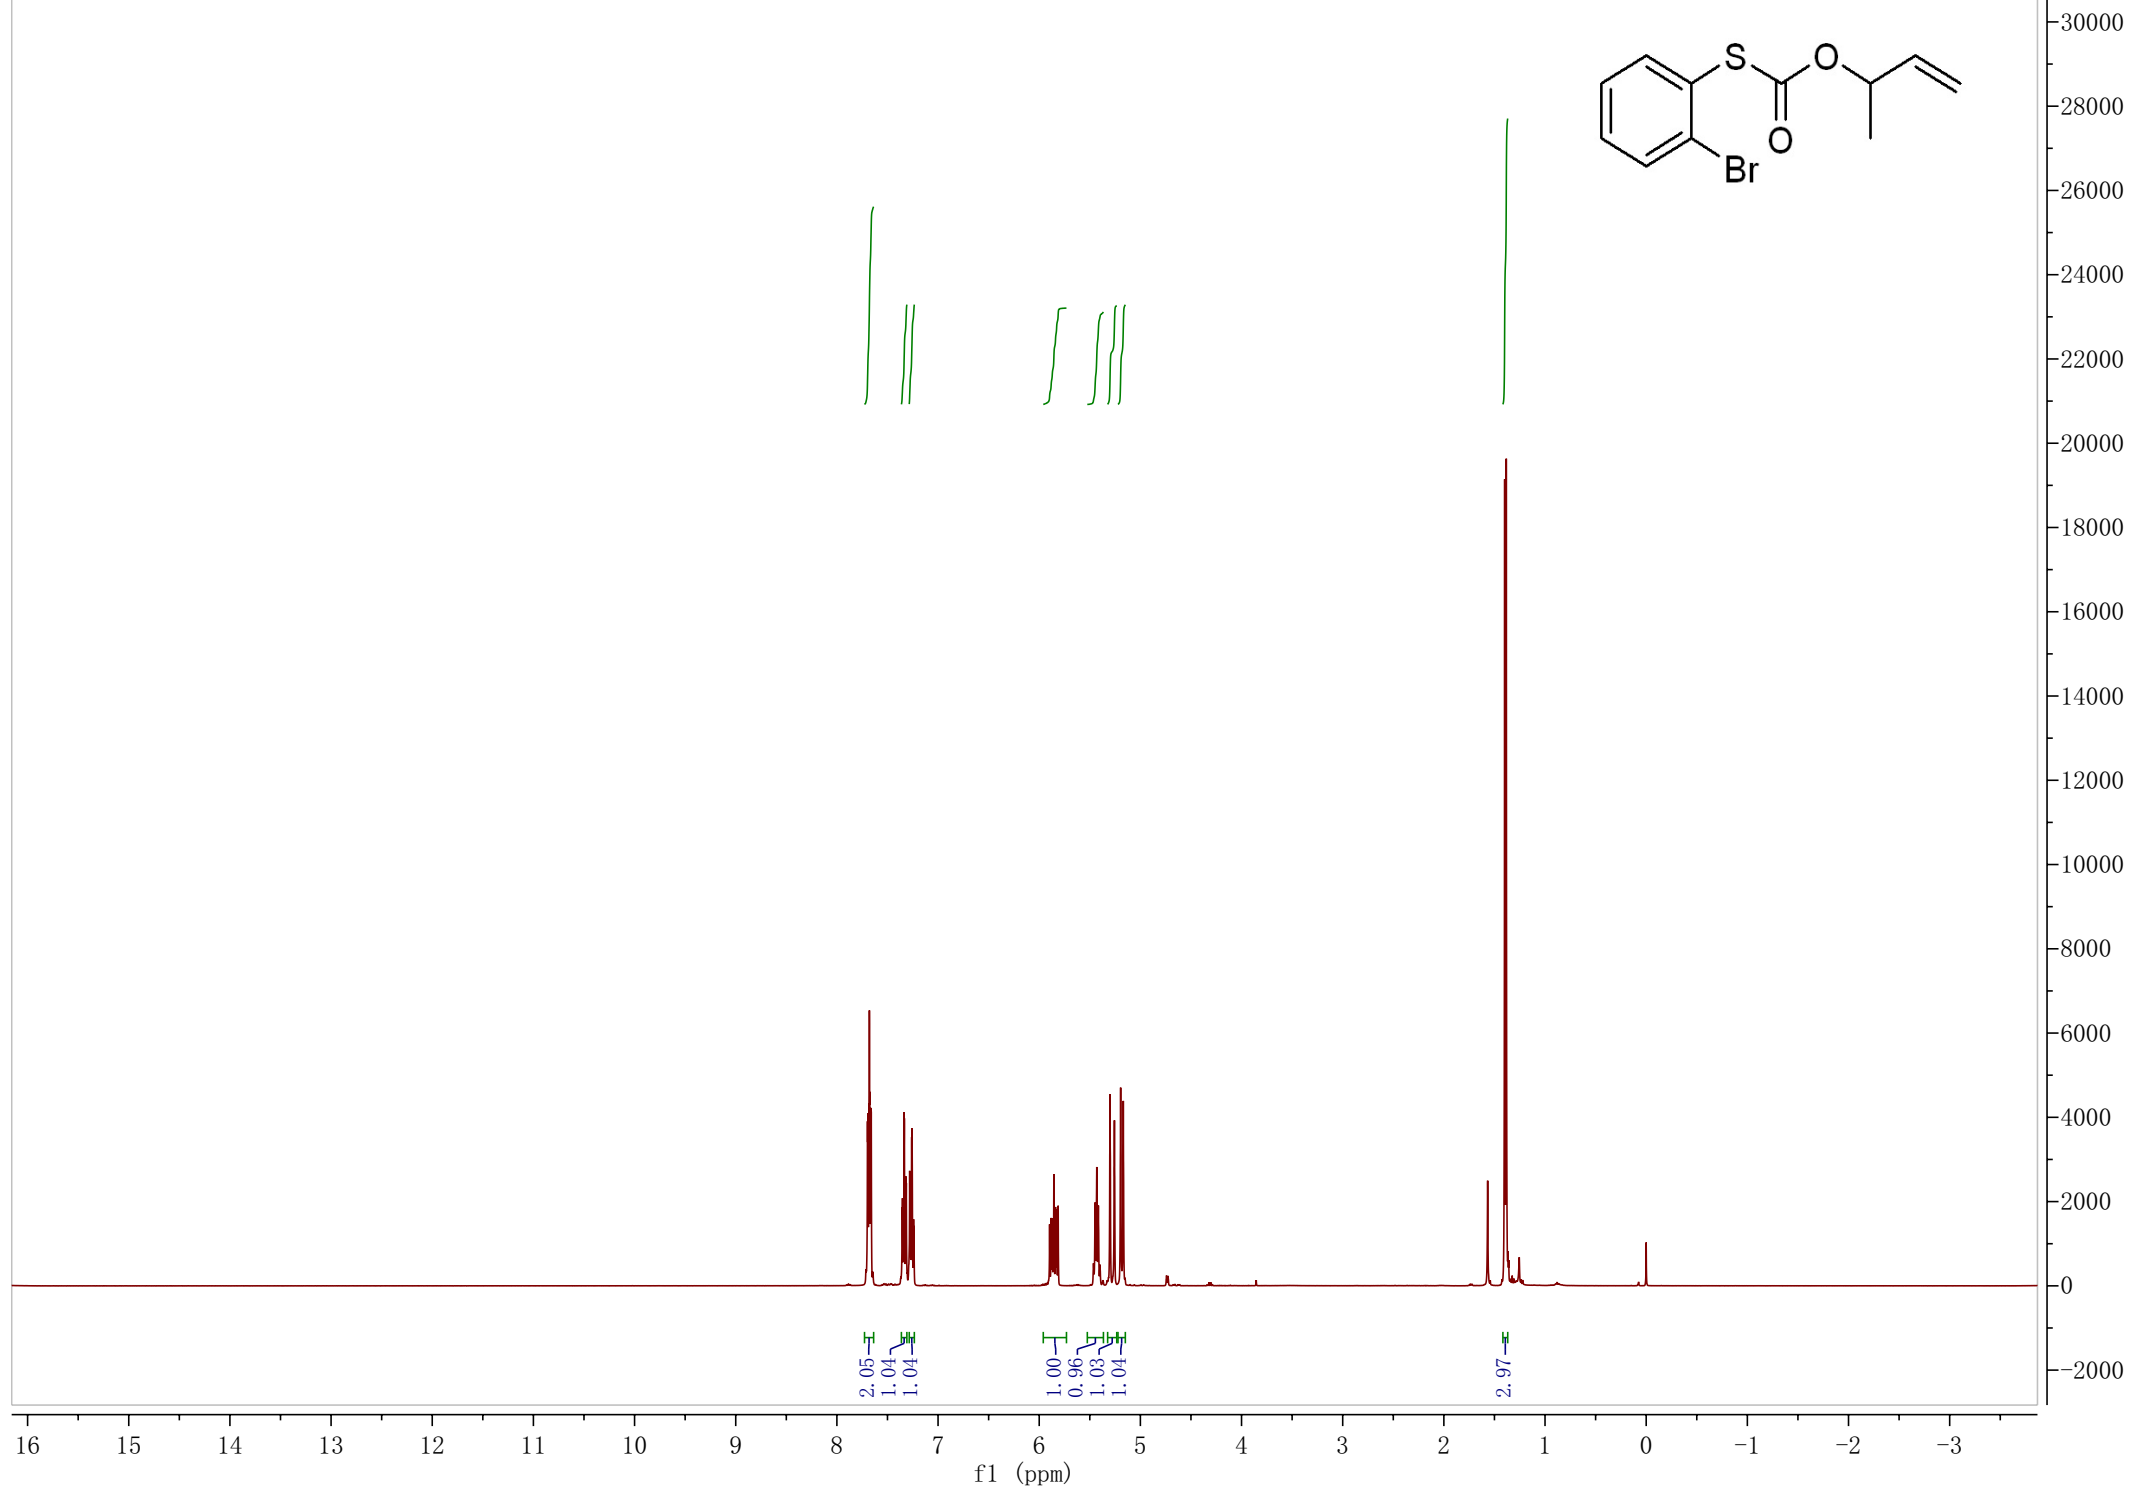

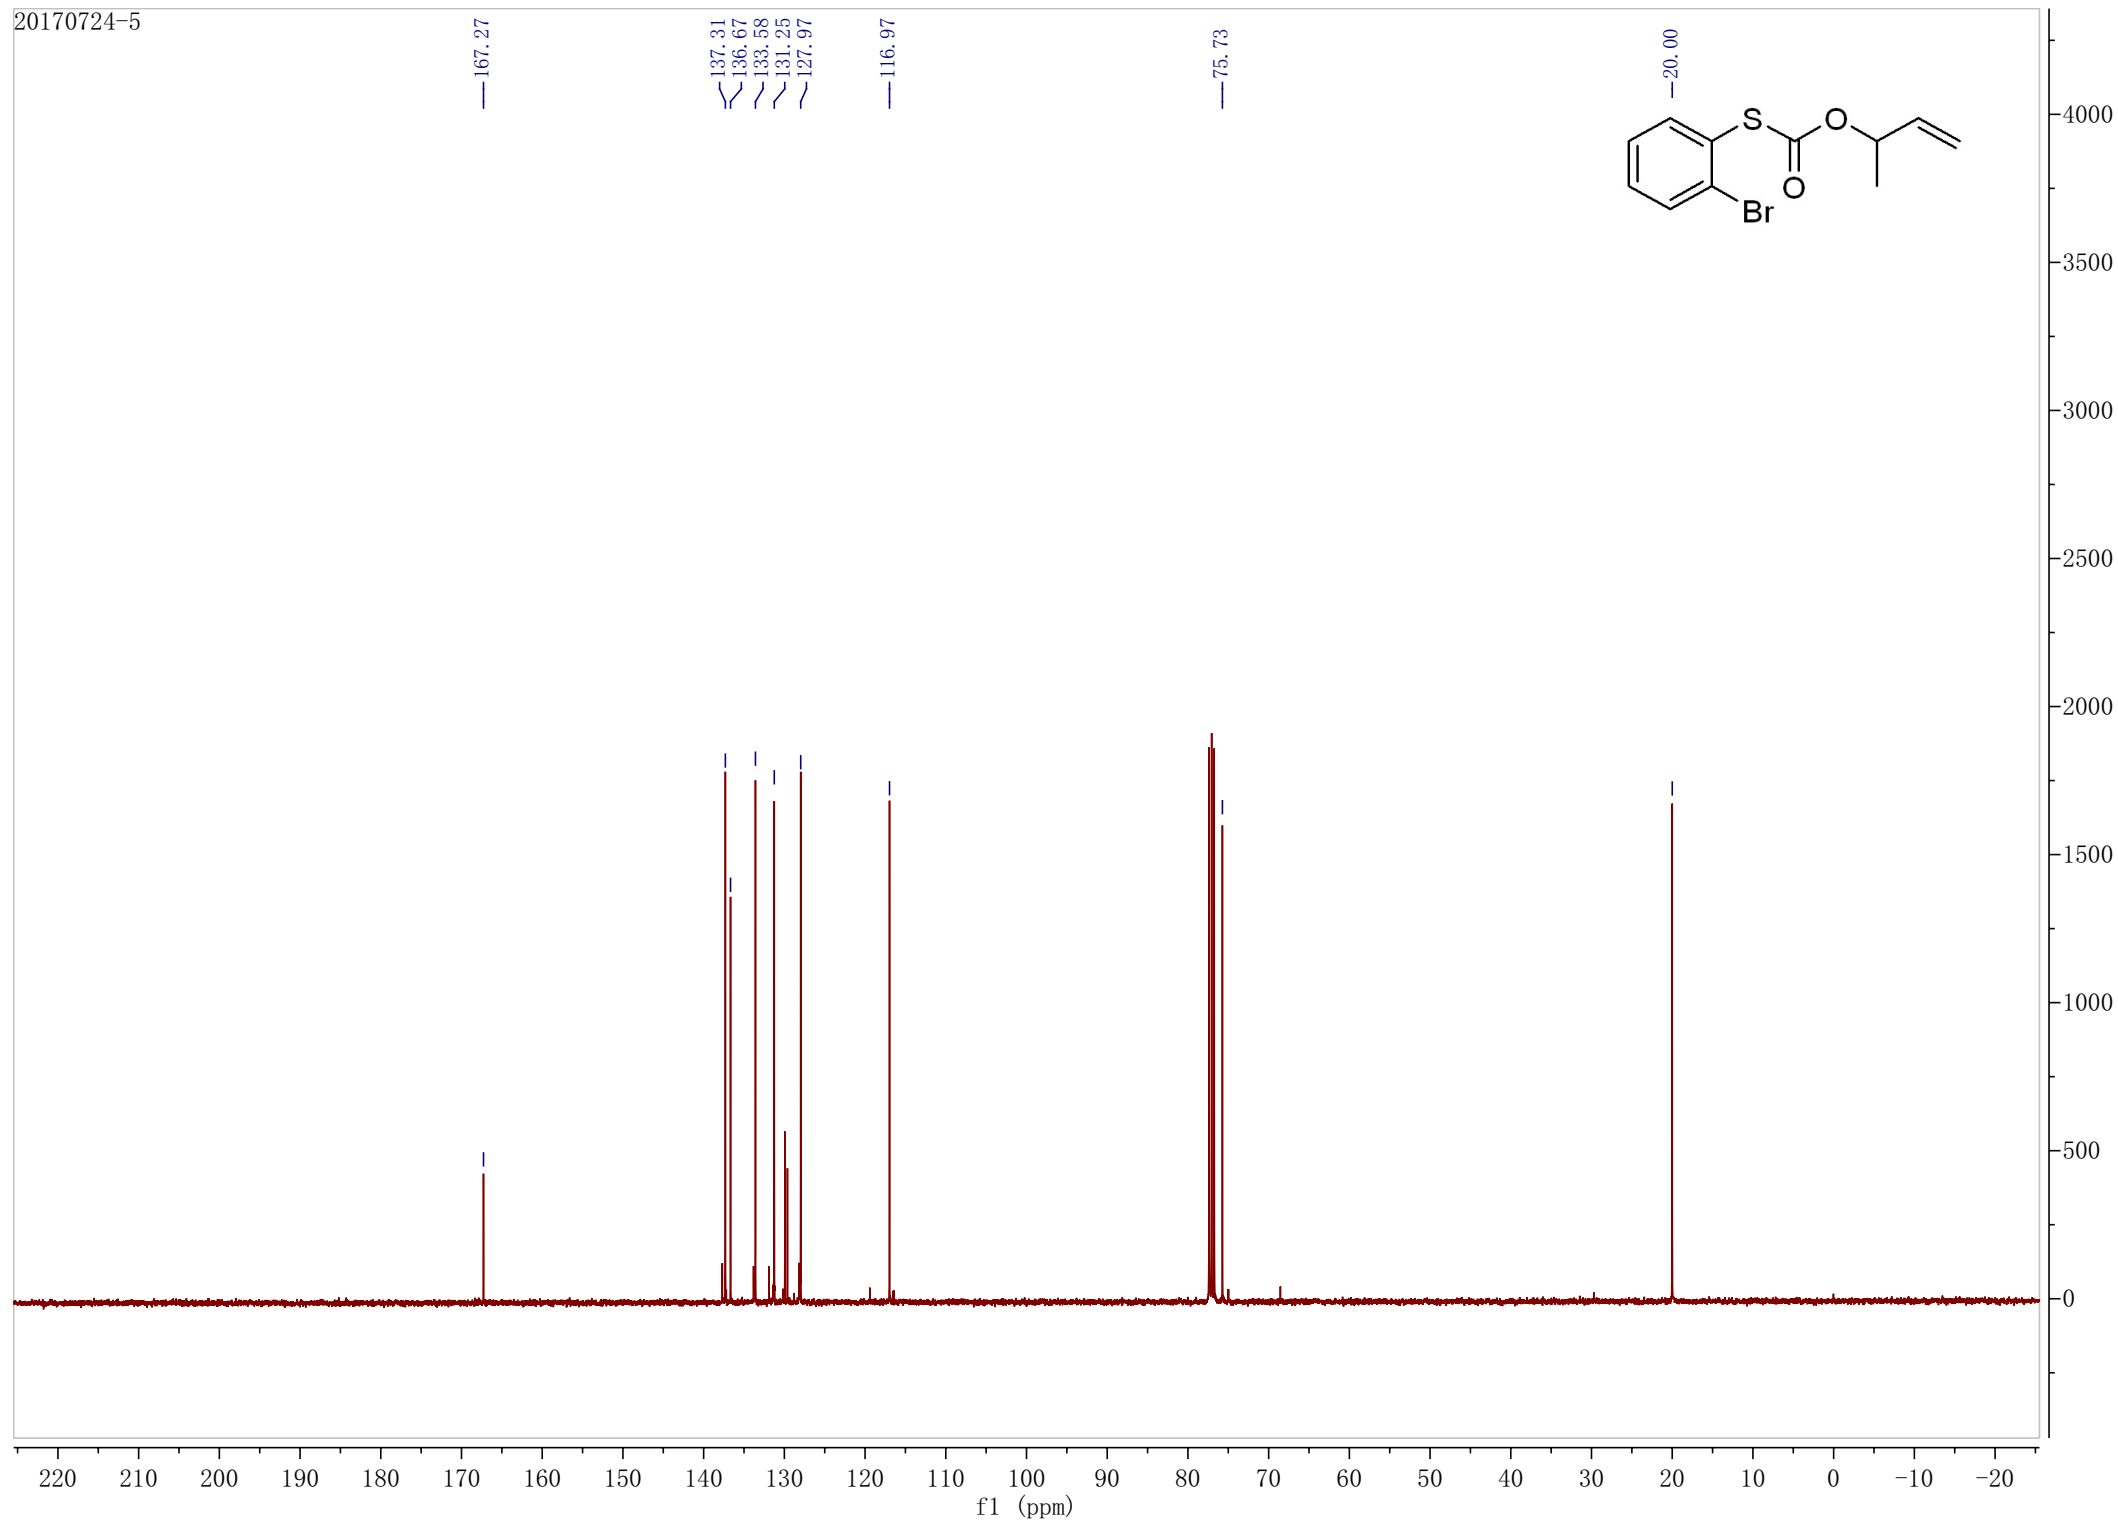

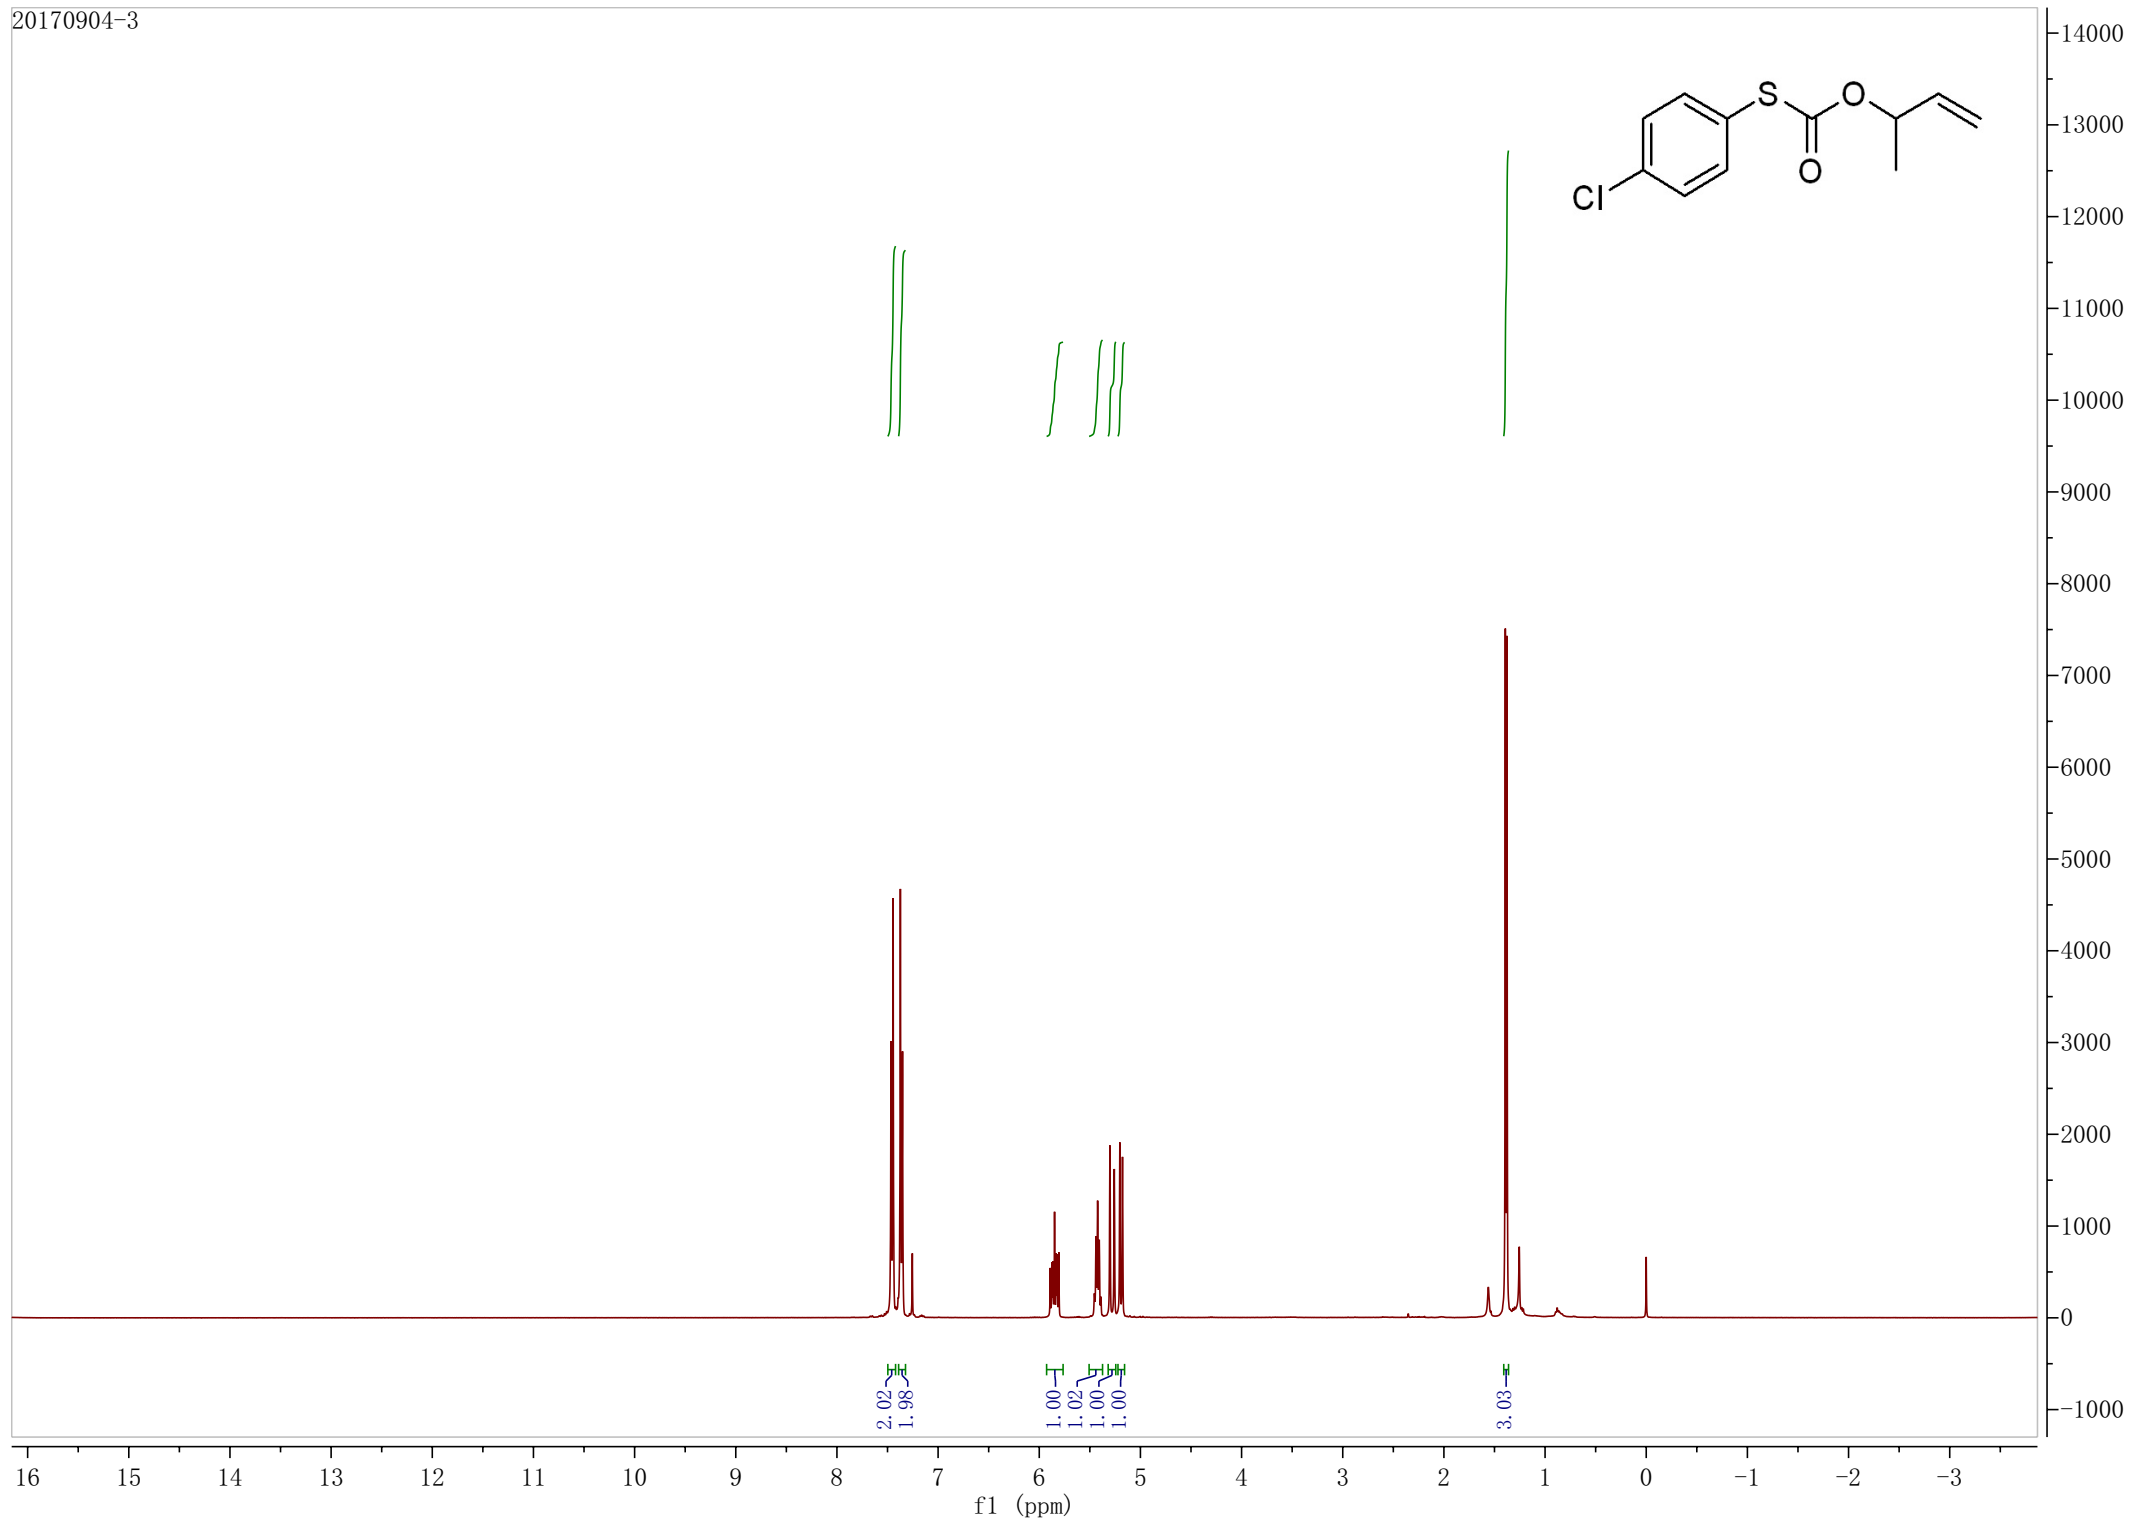

20170904-3

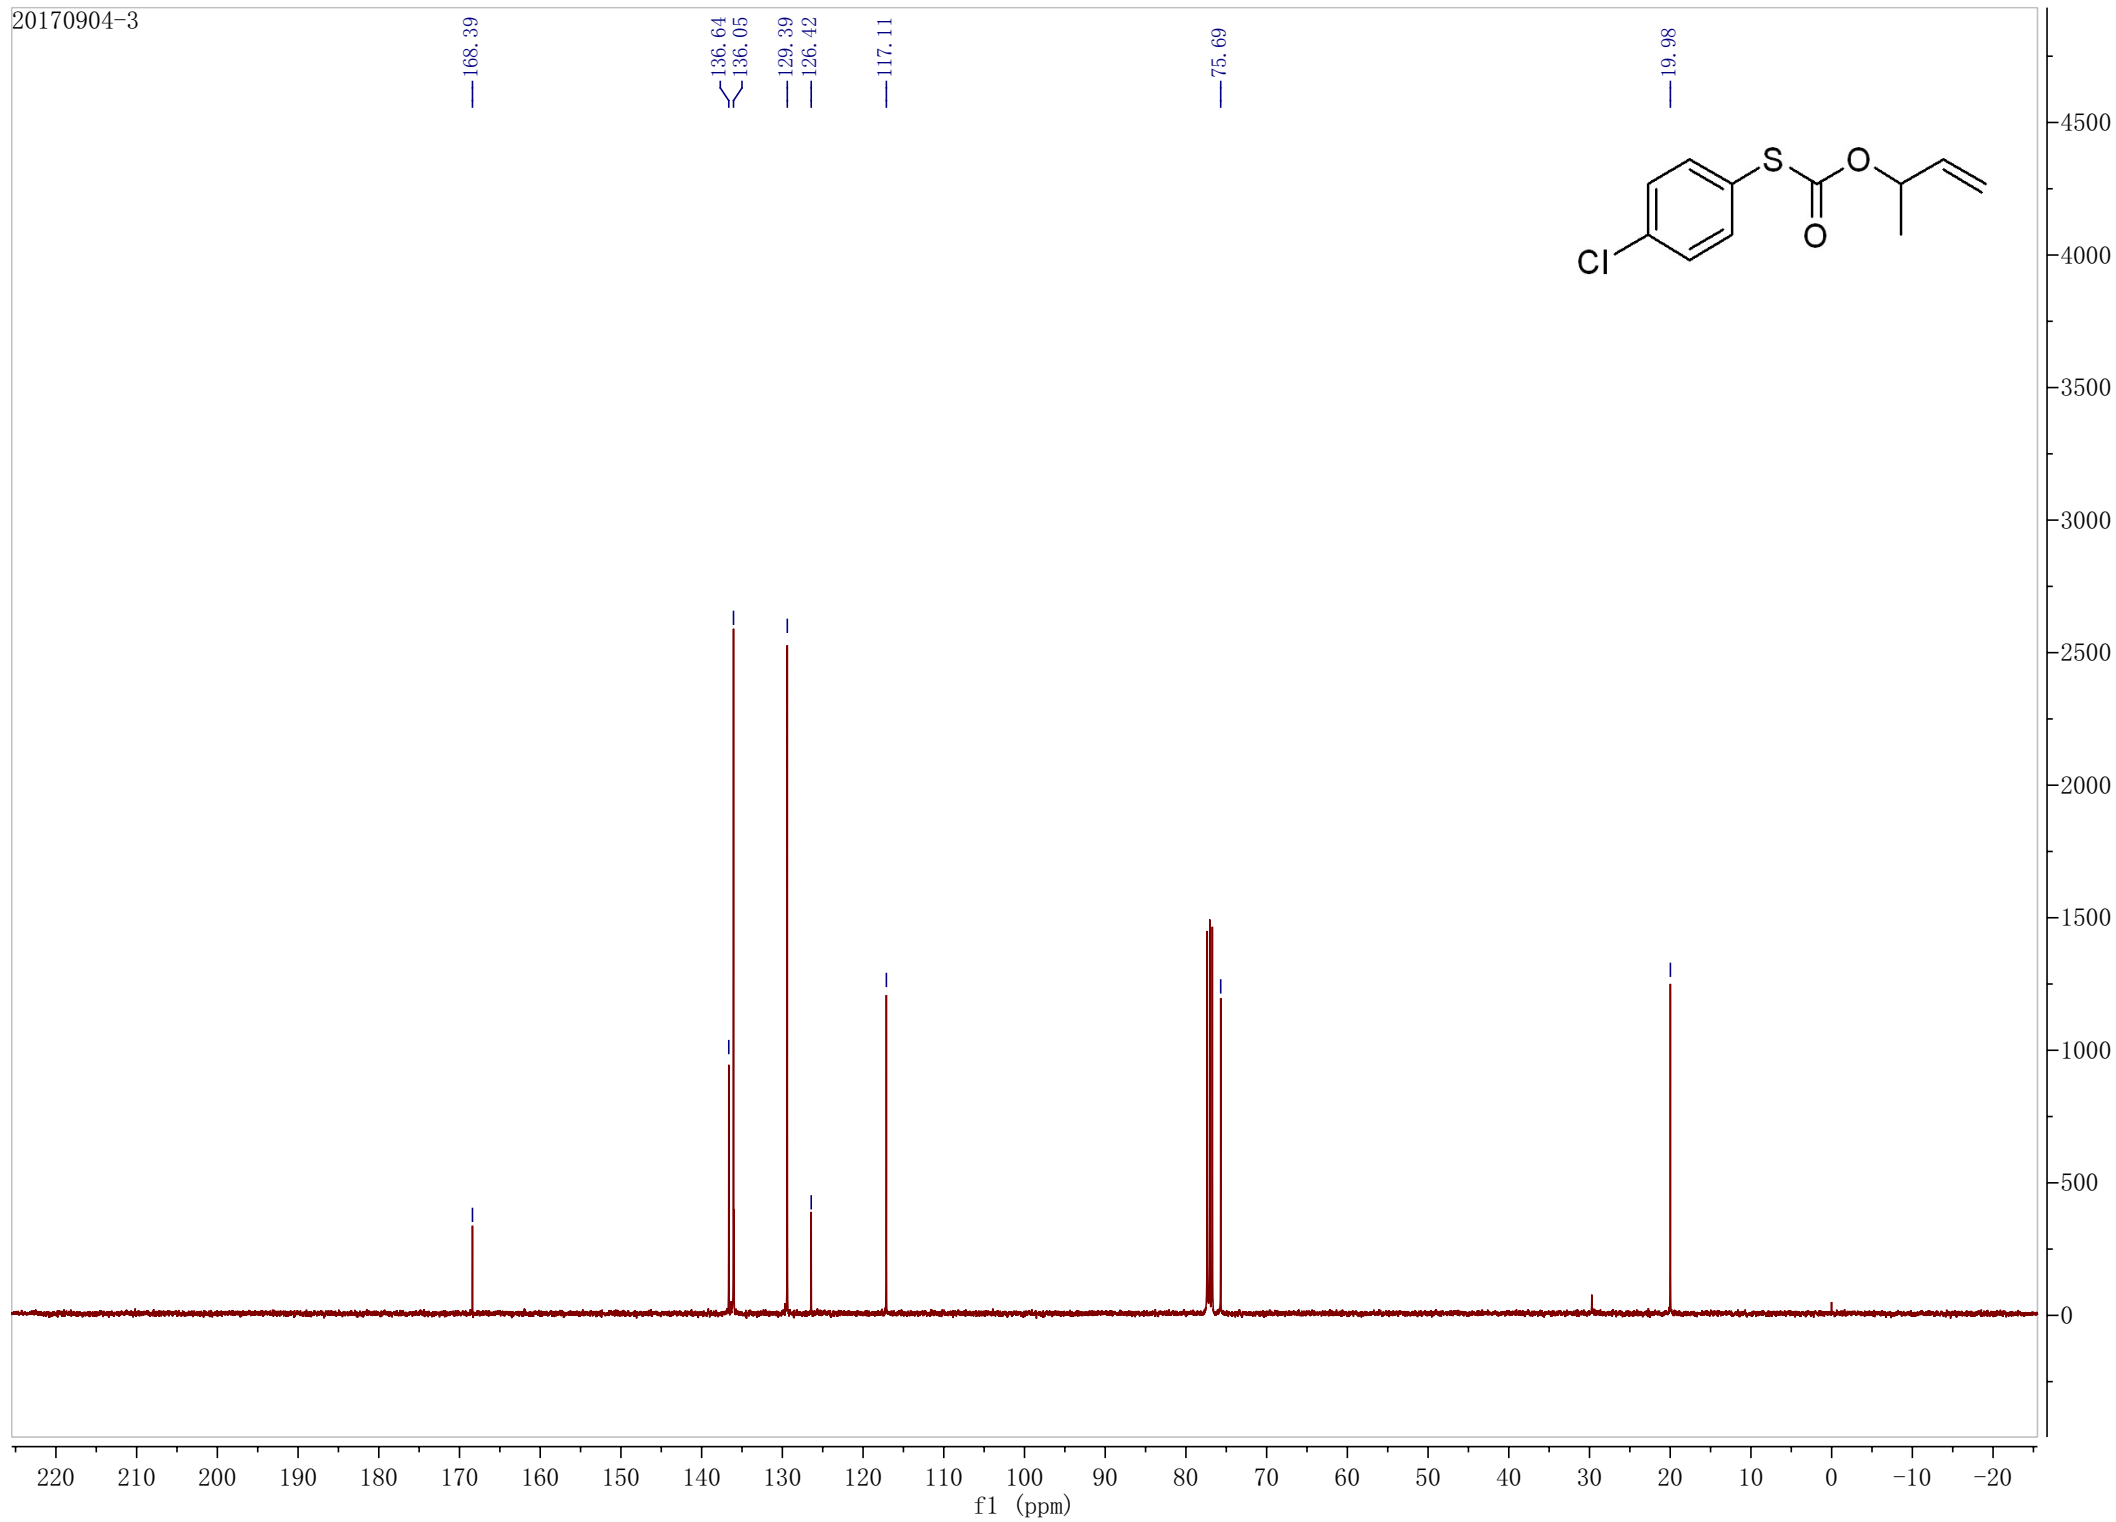

20170904-4

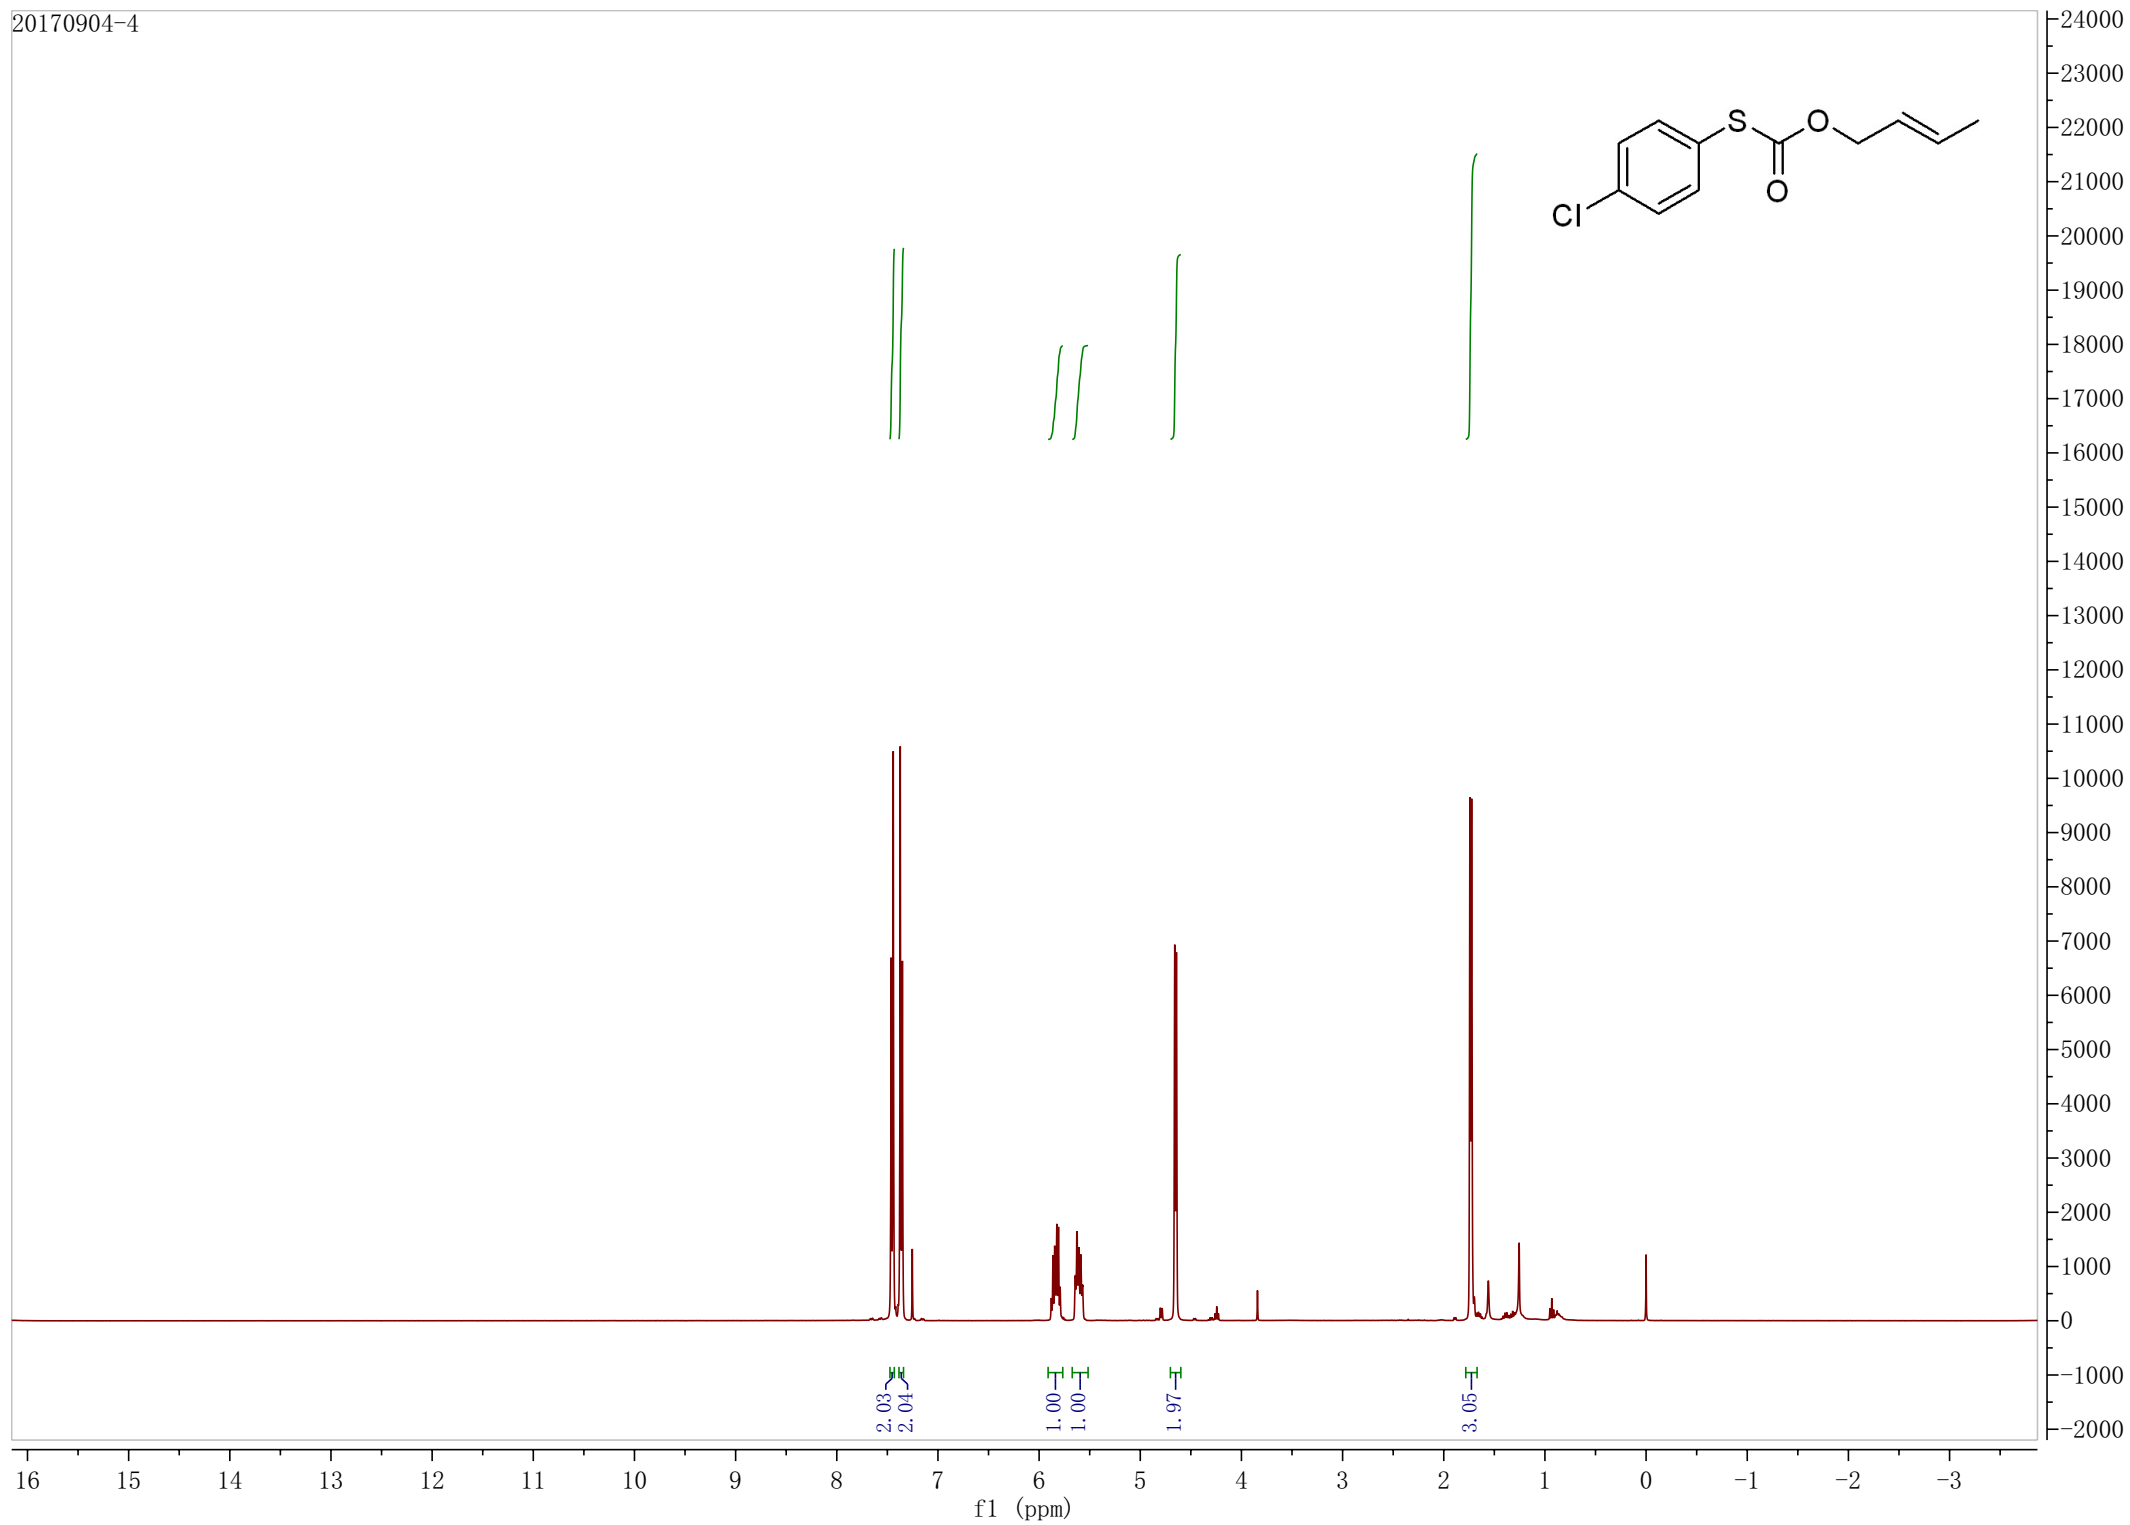

20170904-4

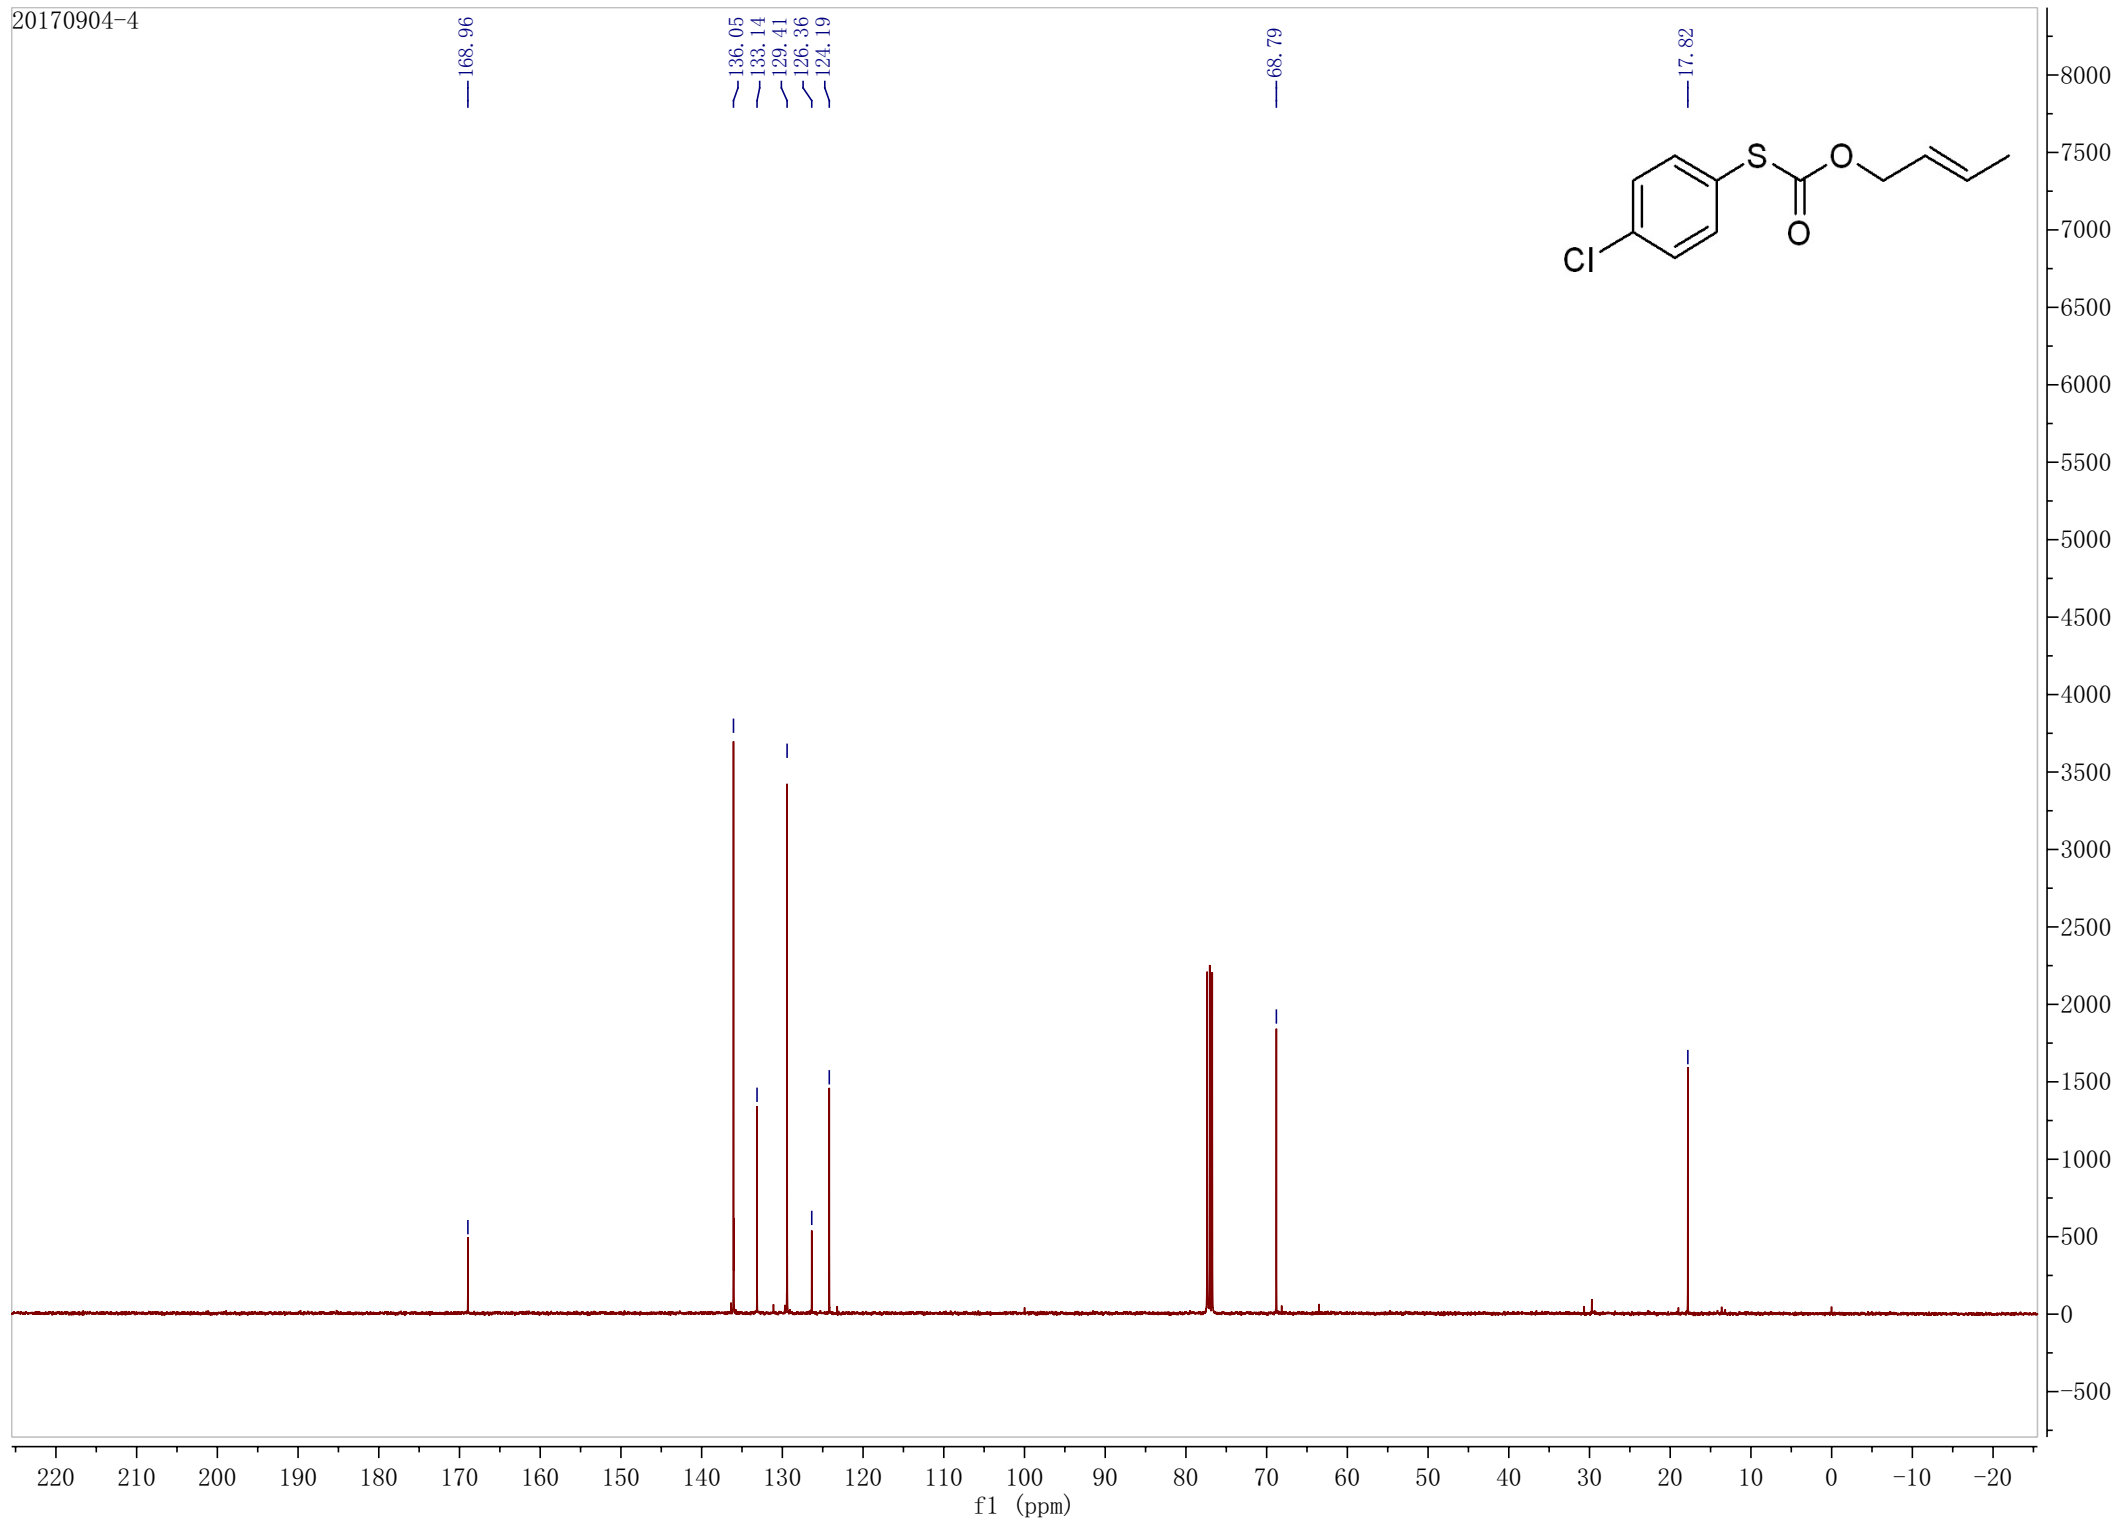

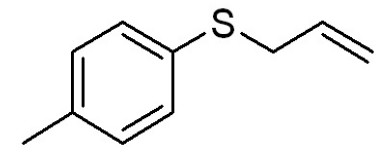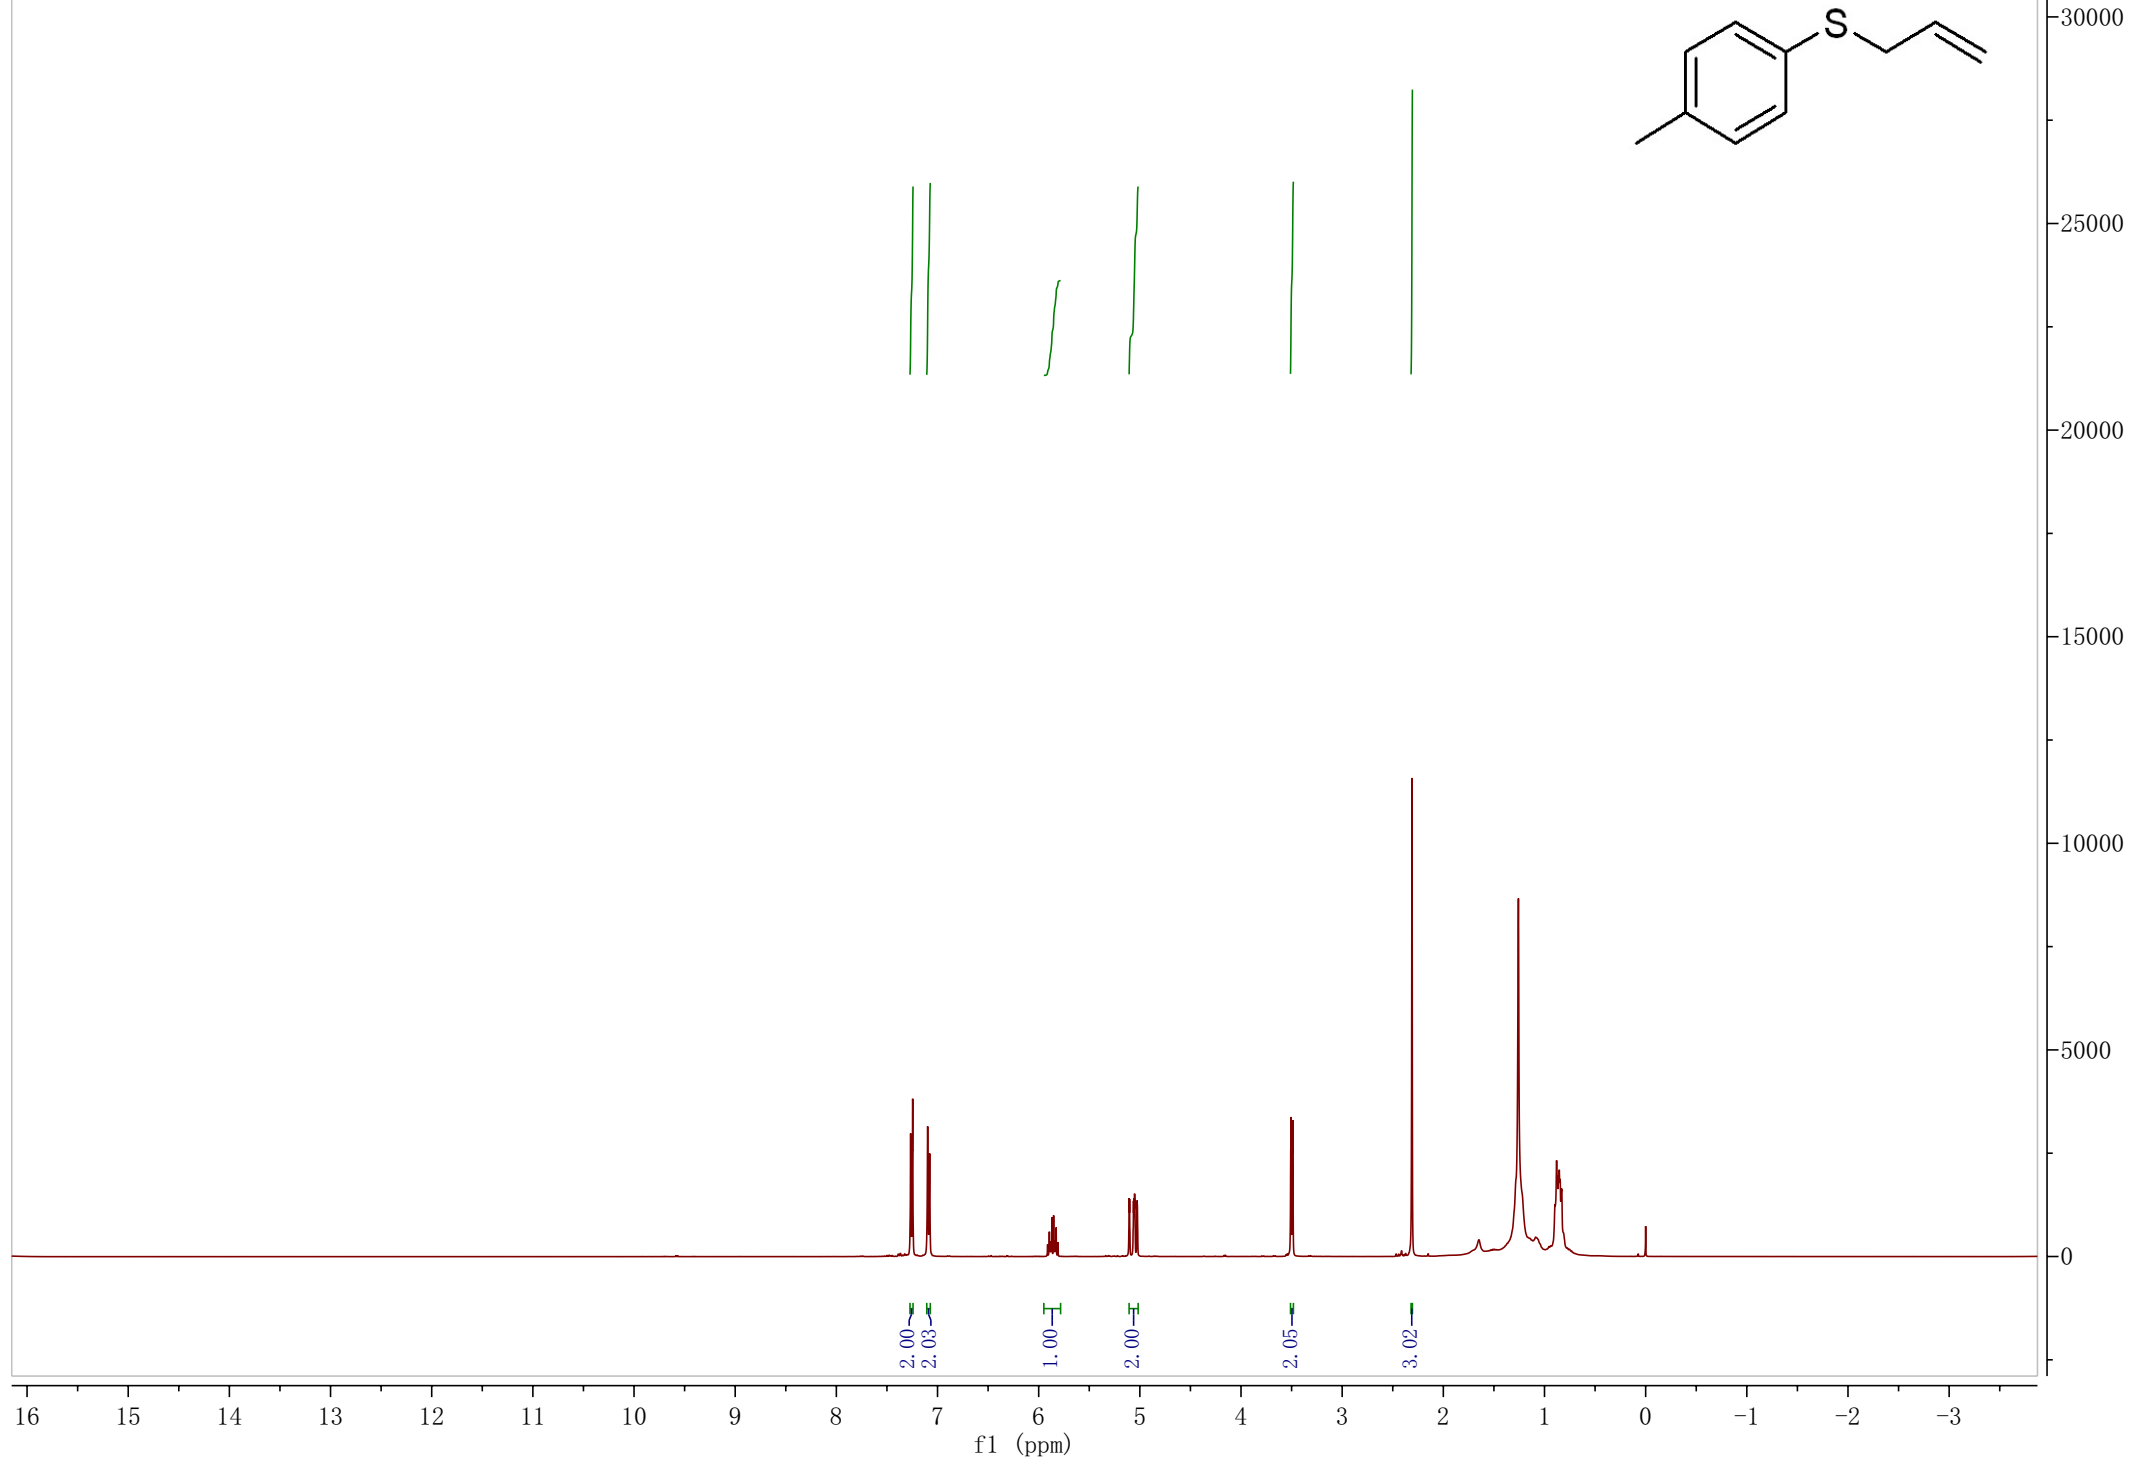



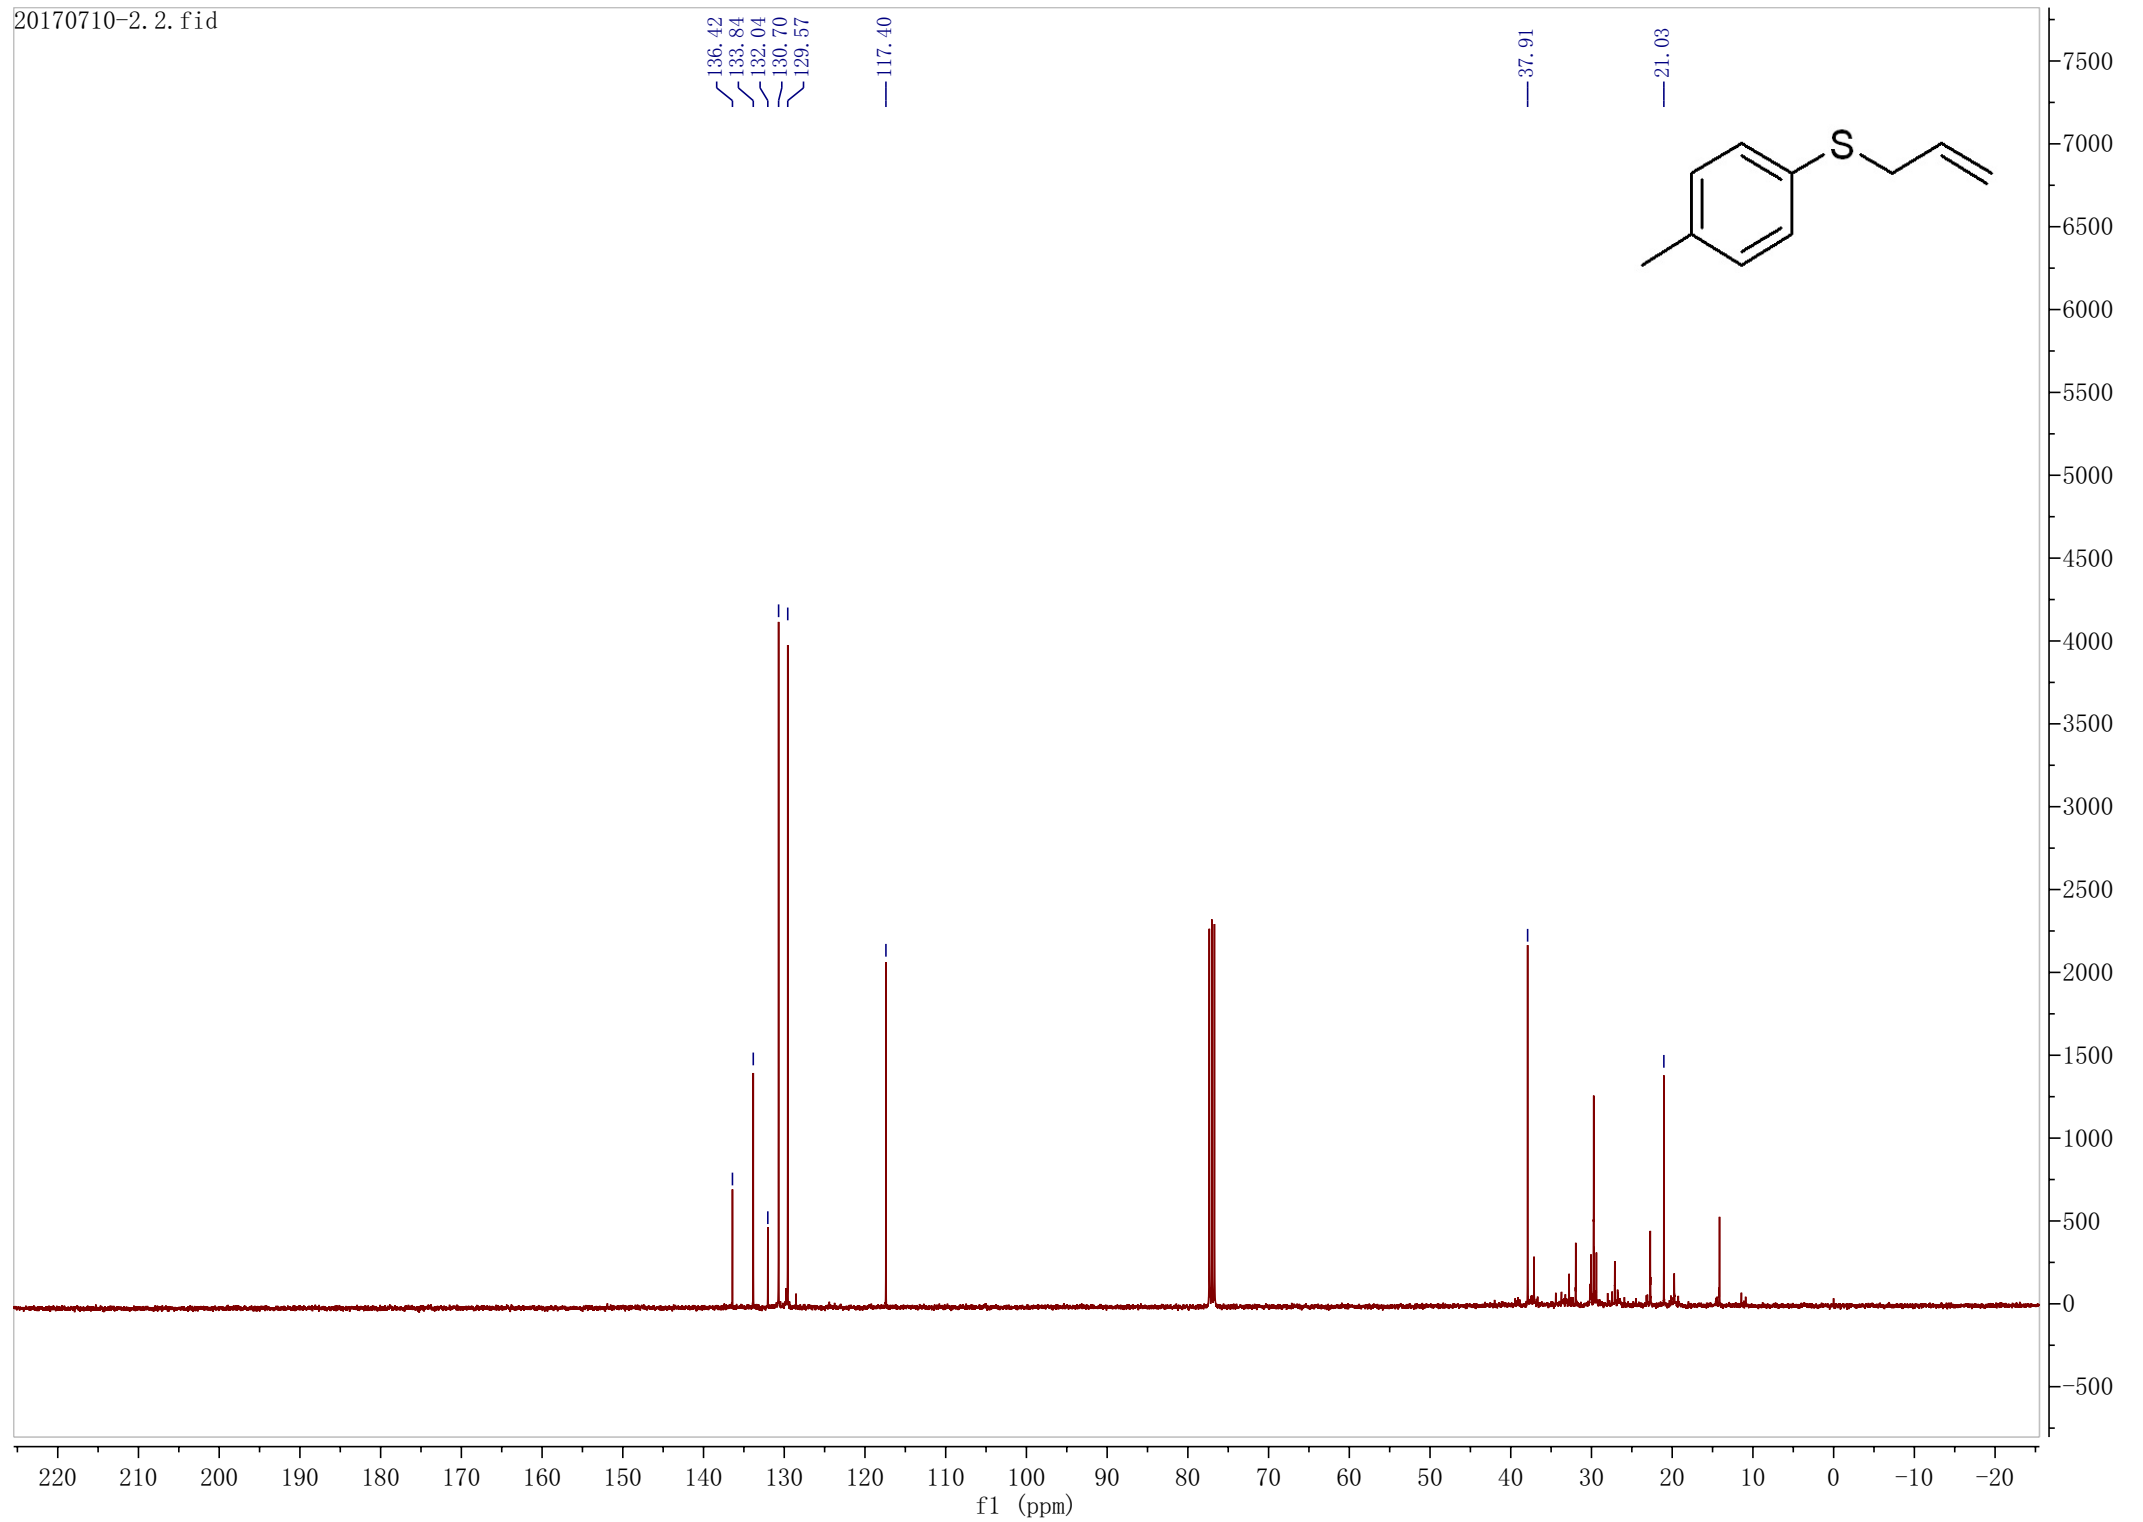

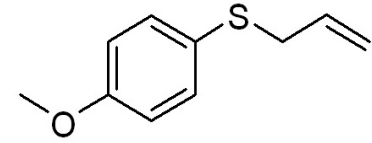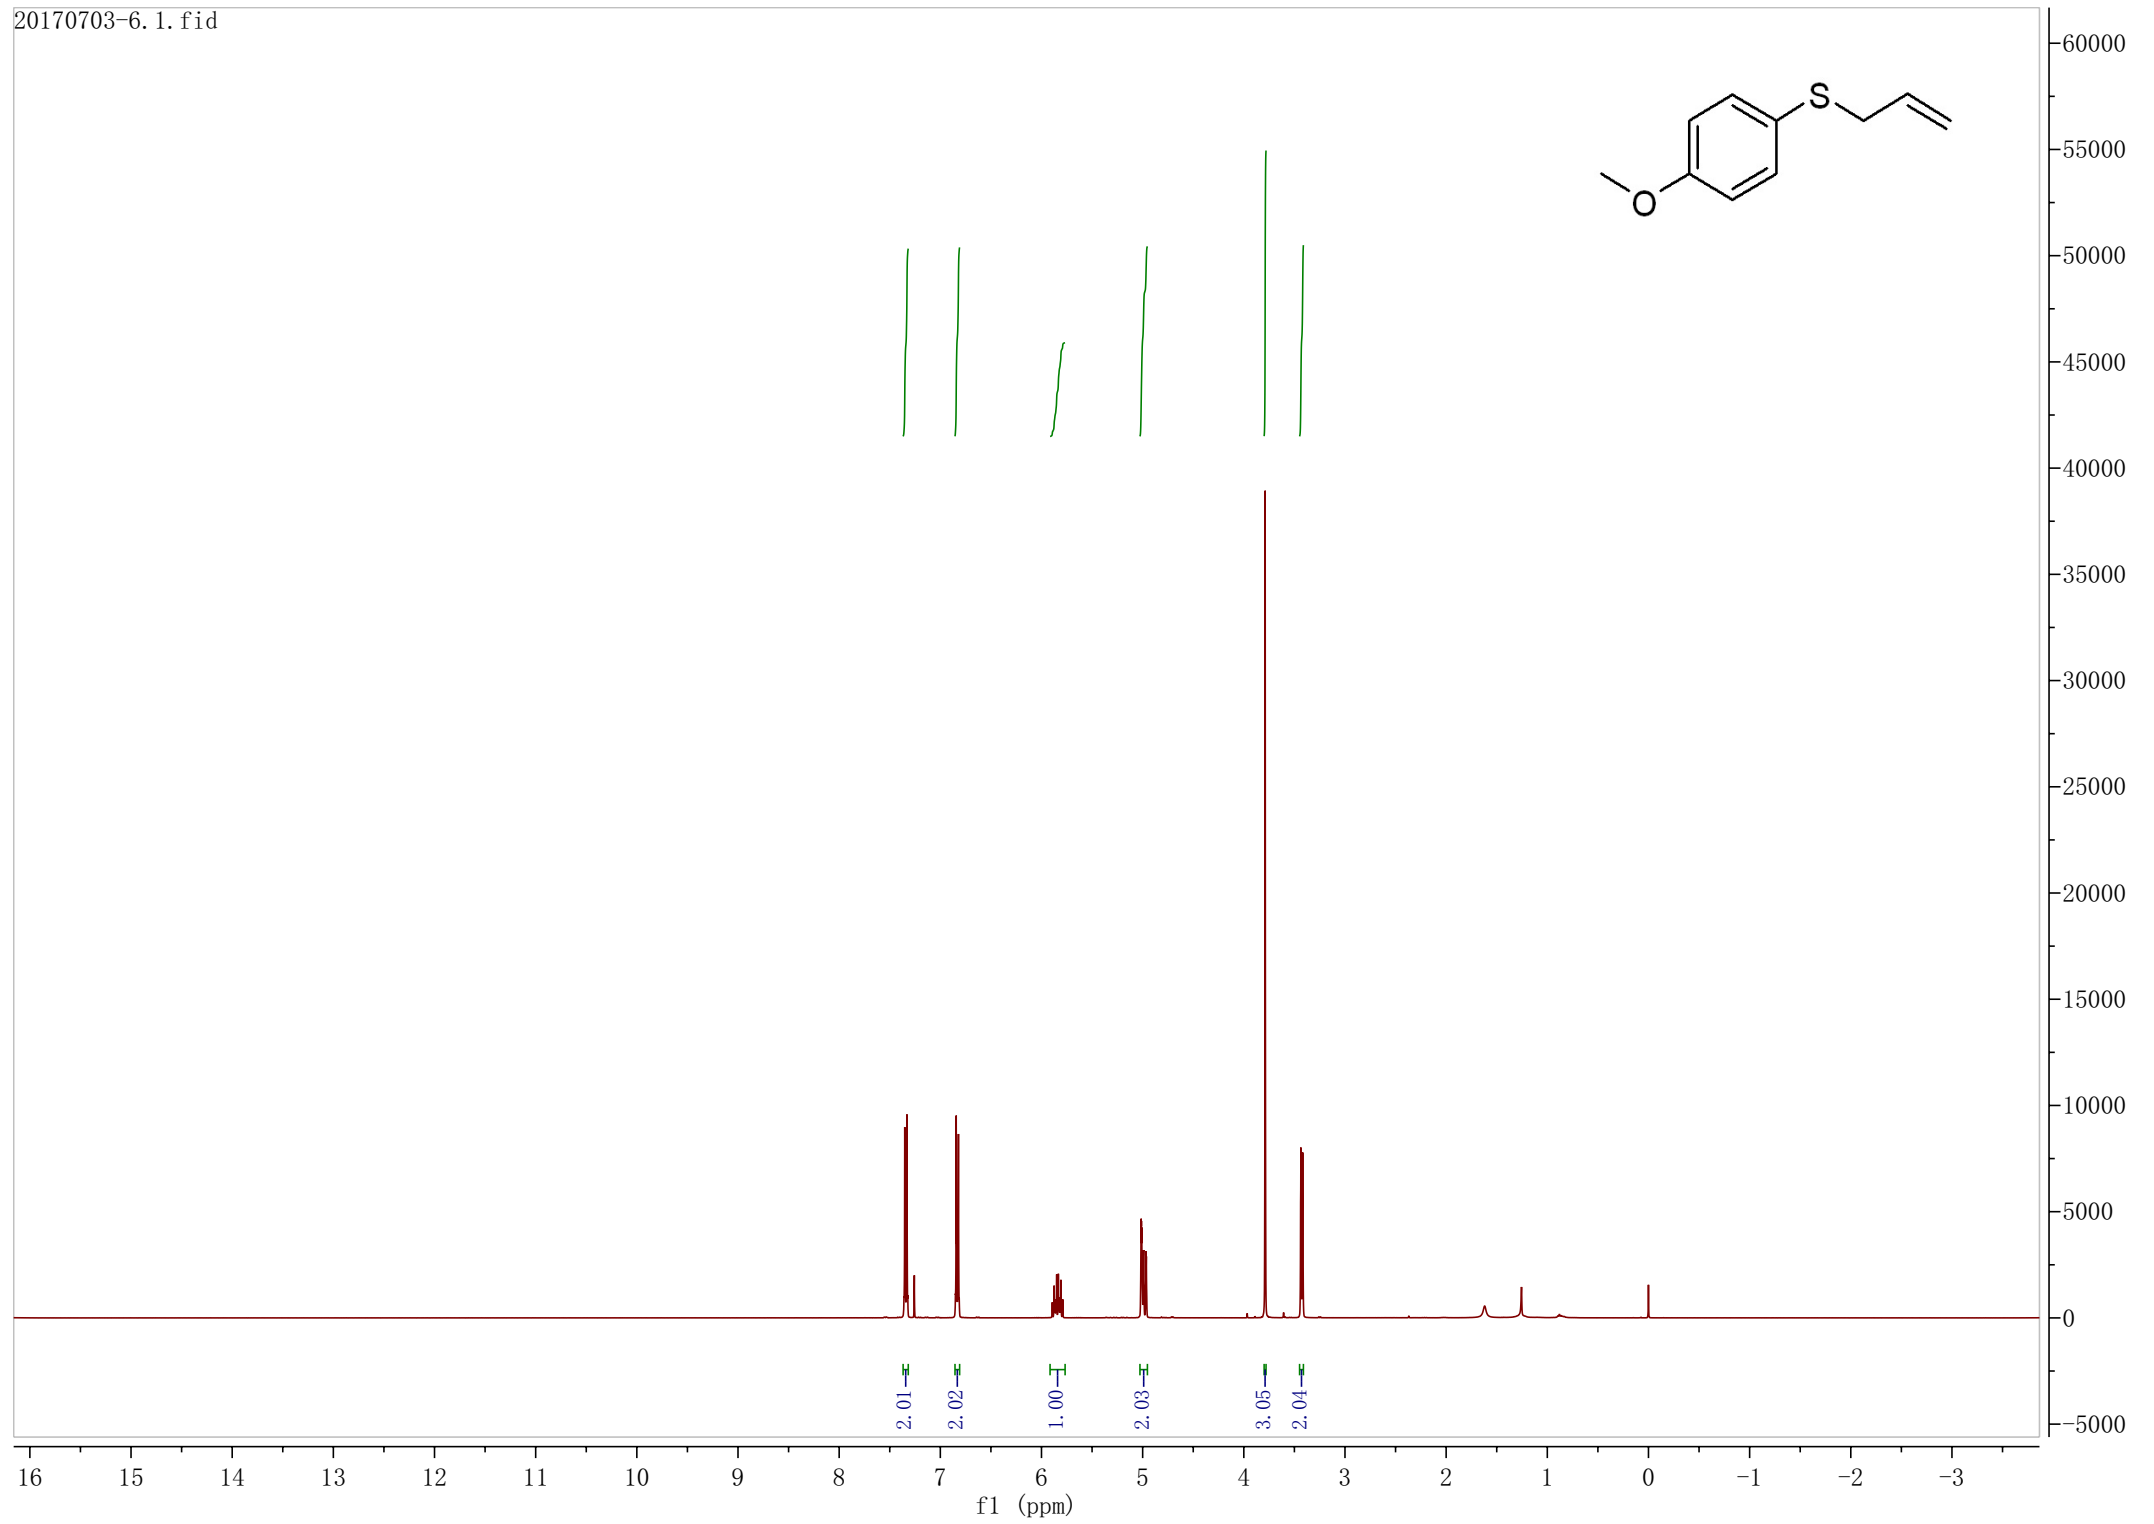

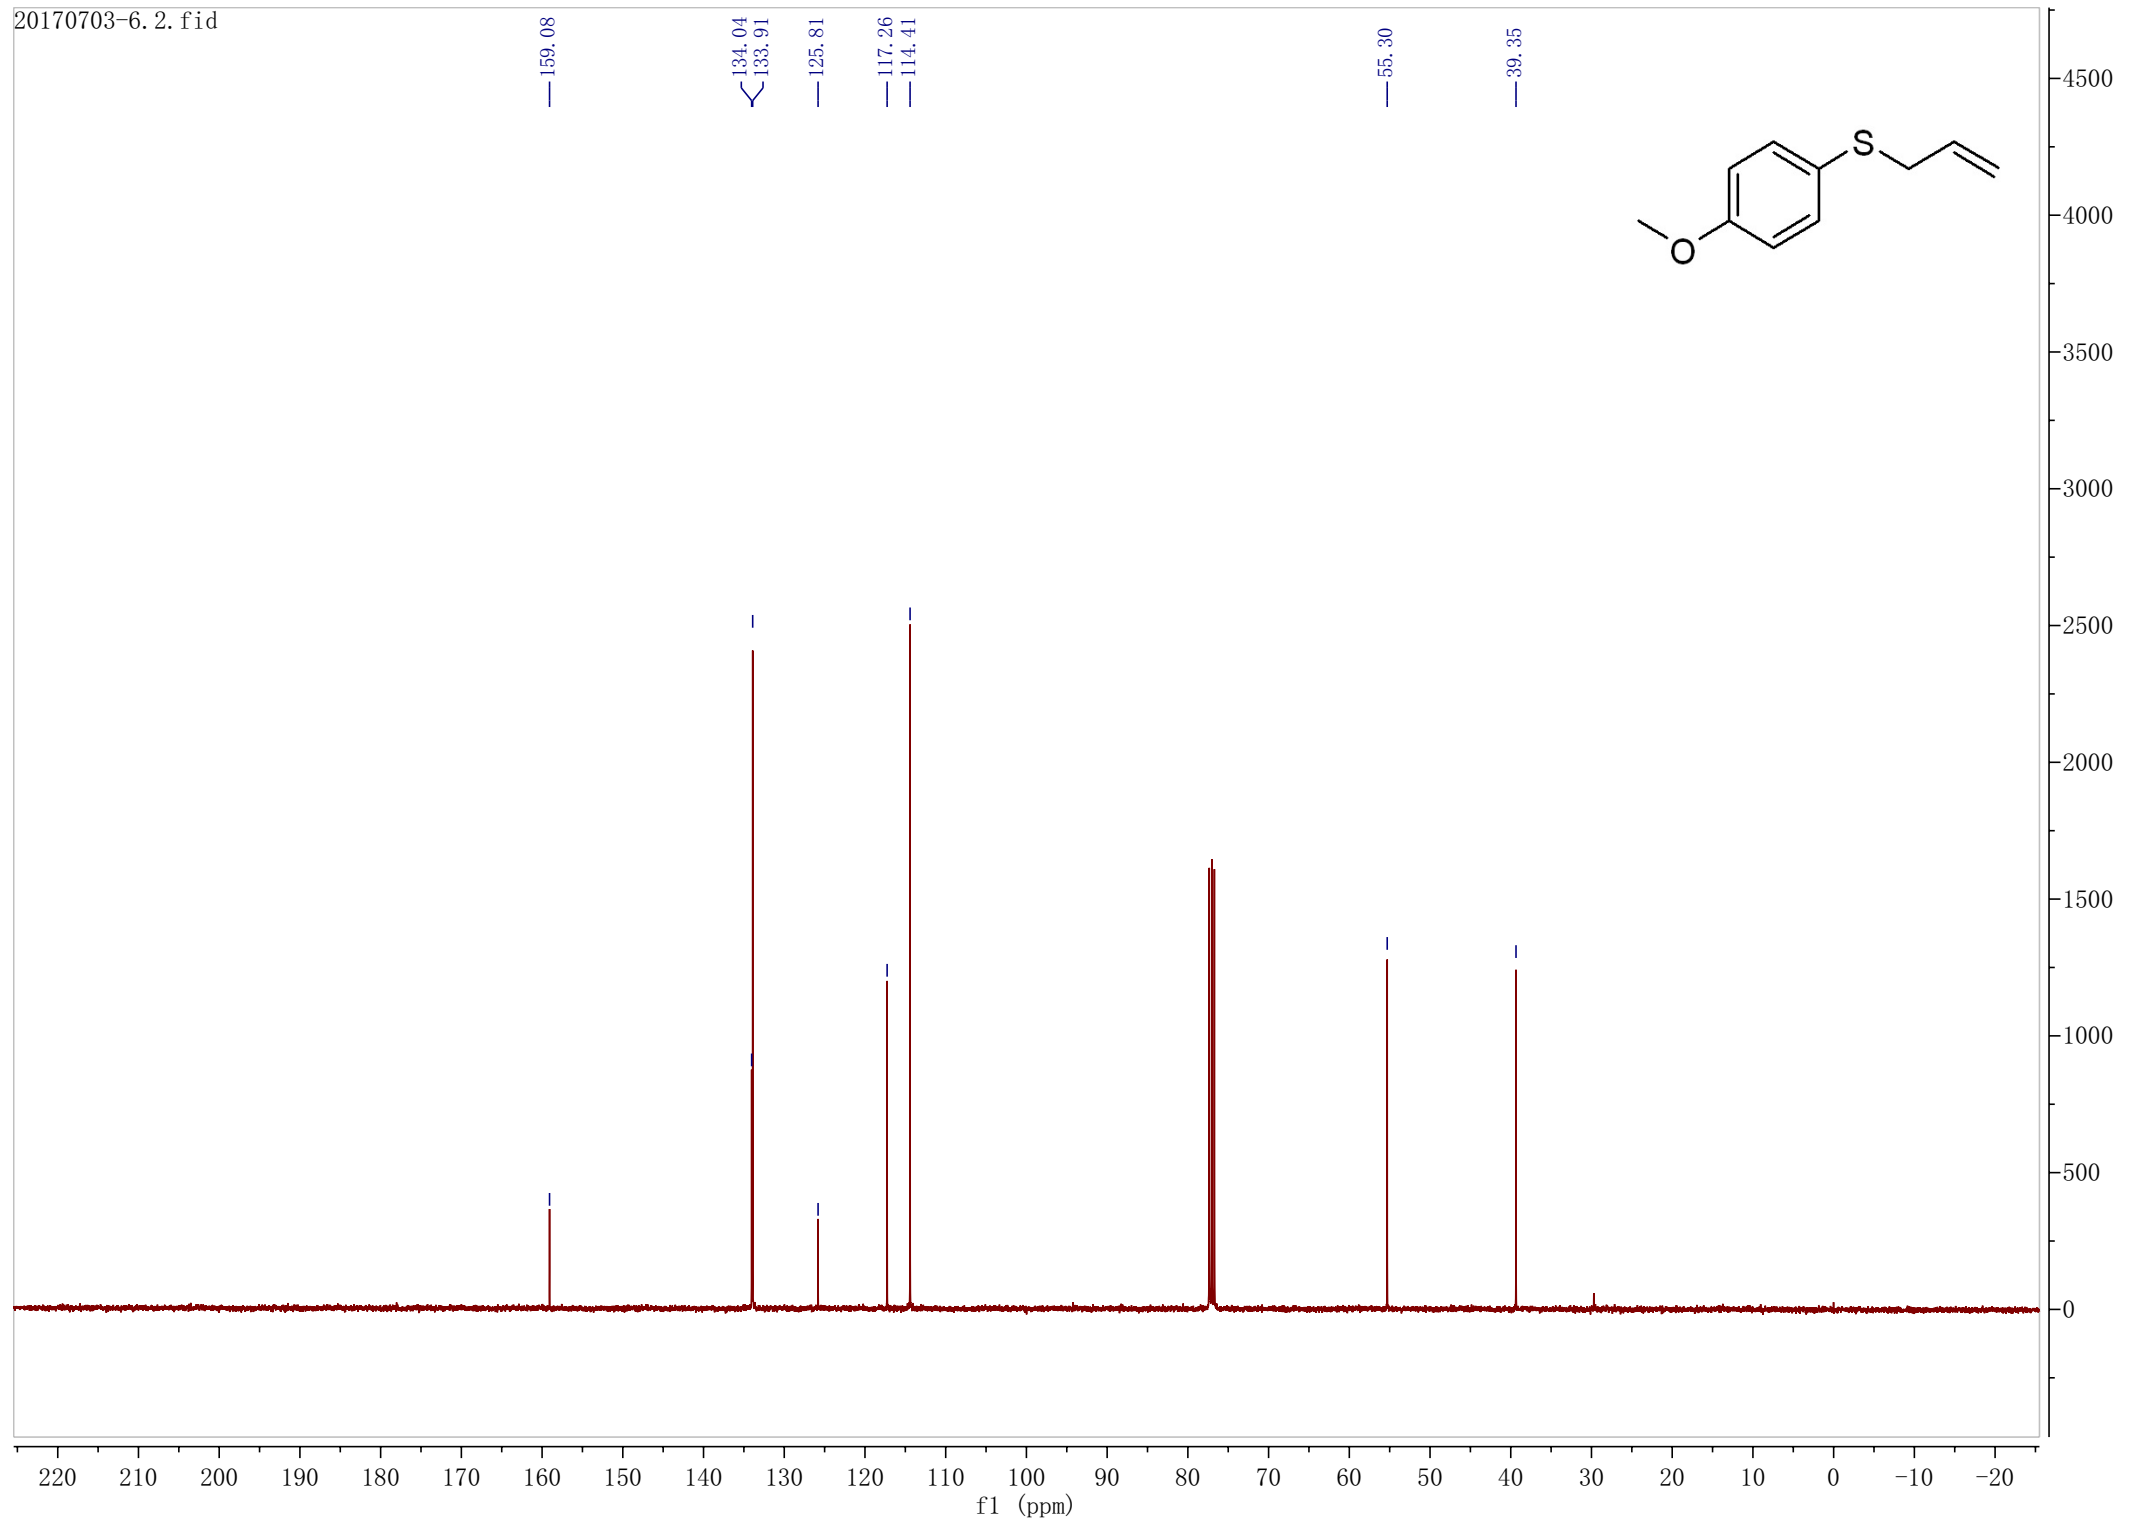

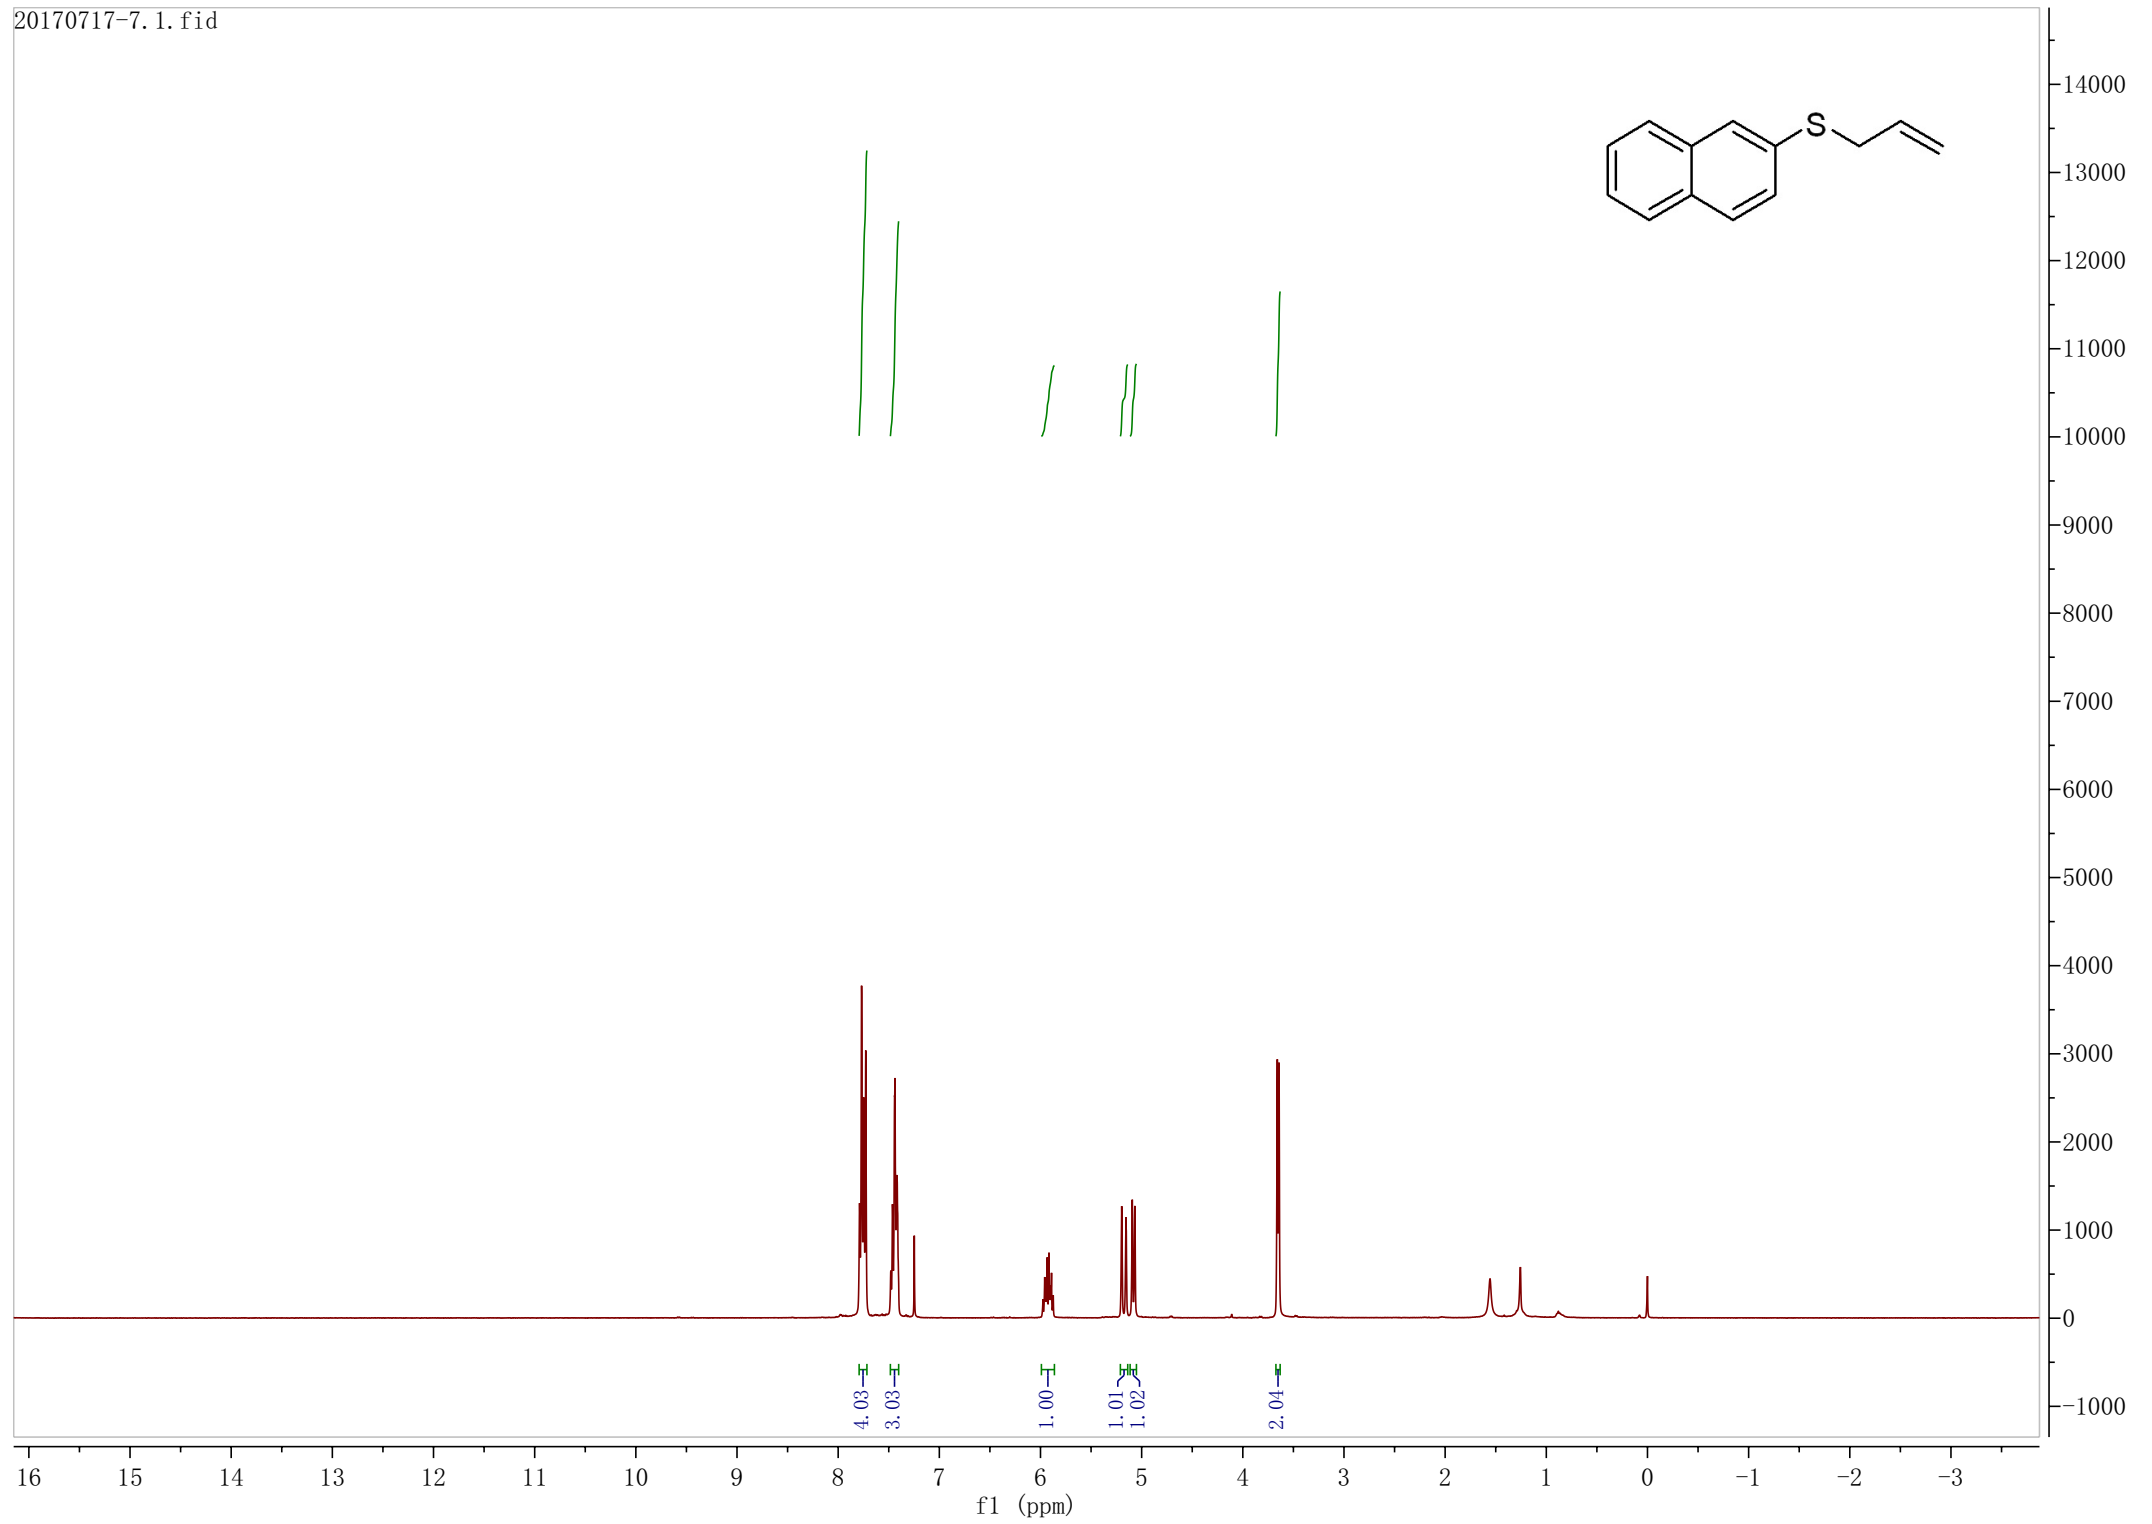

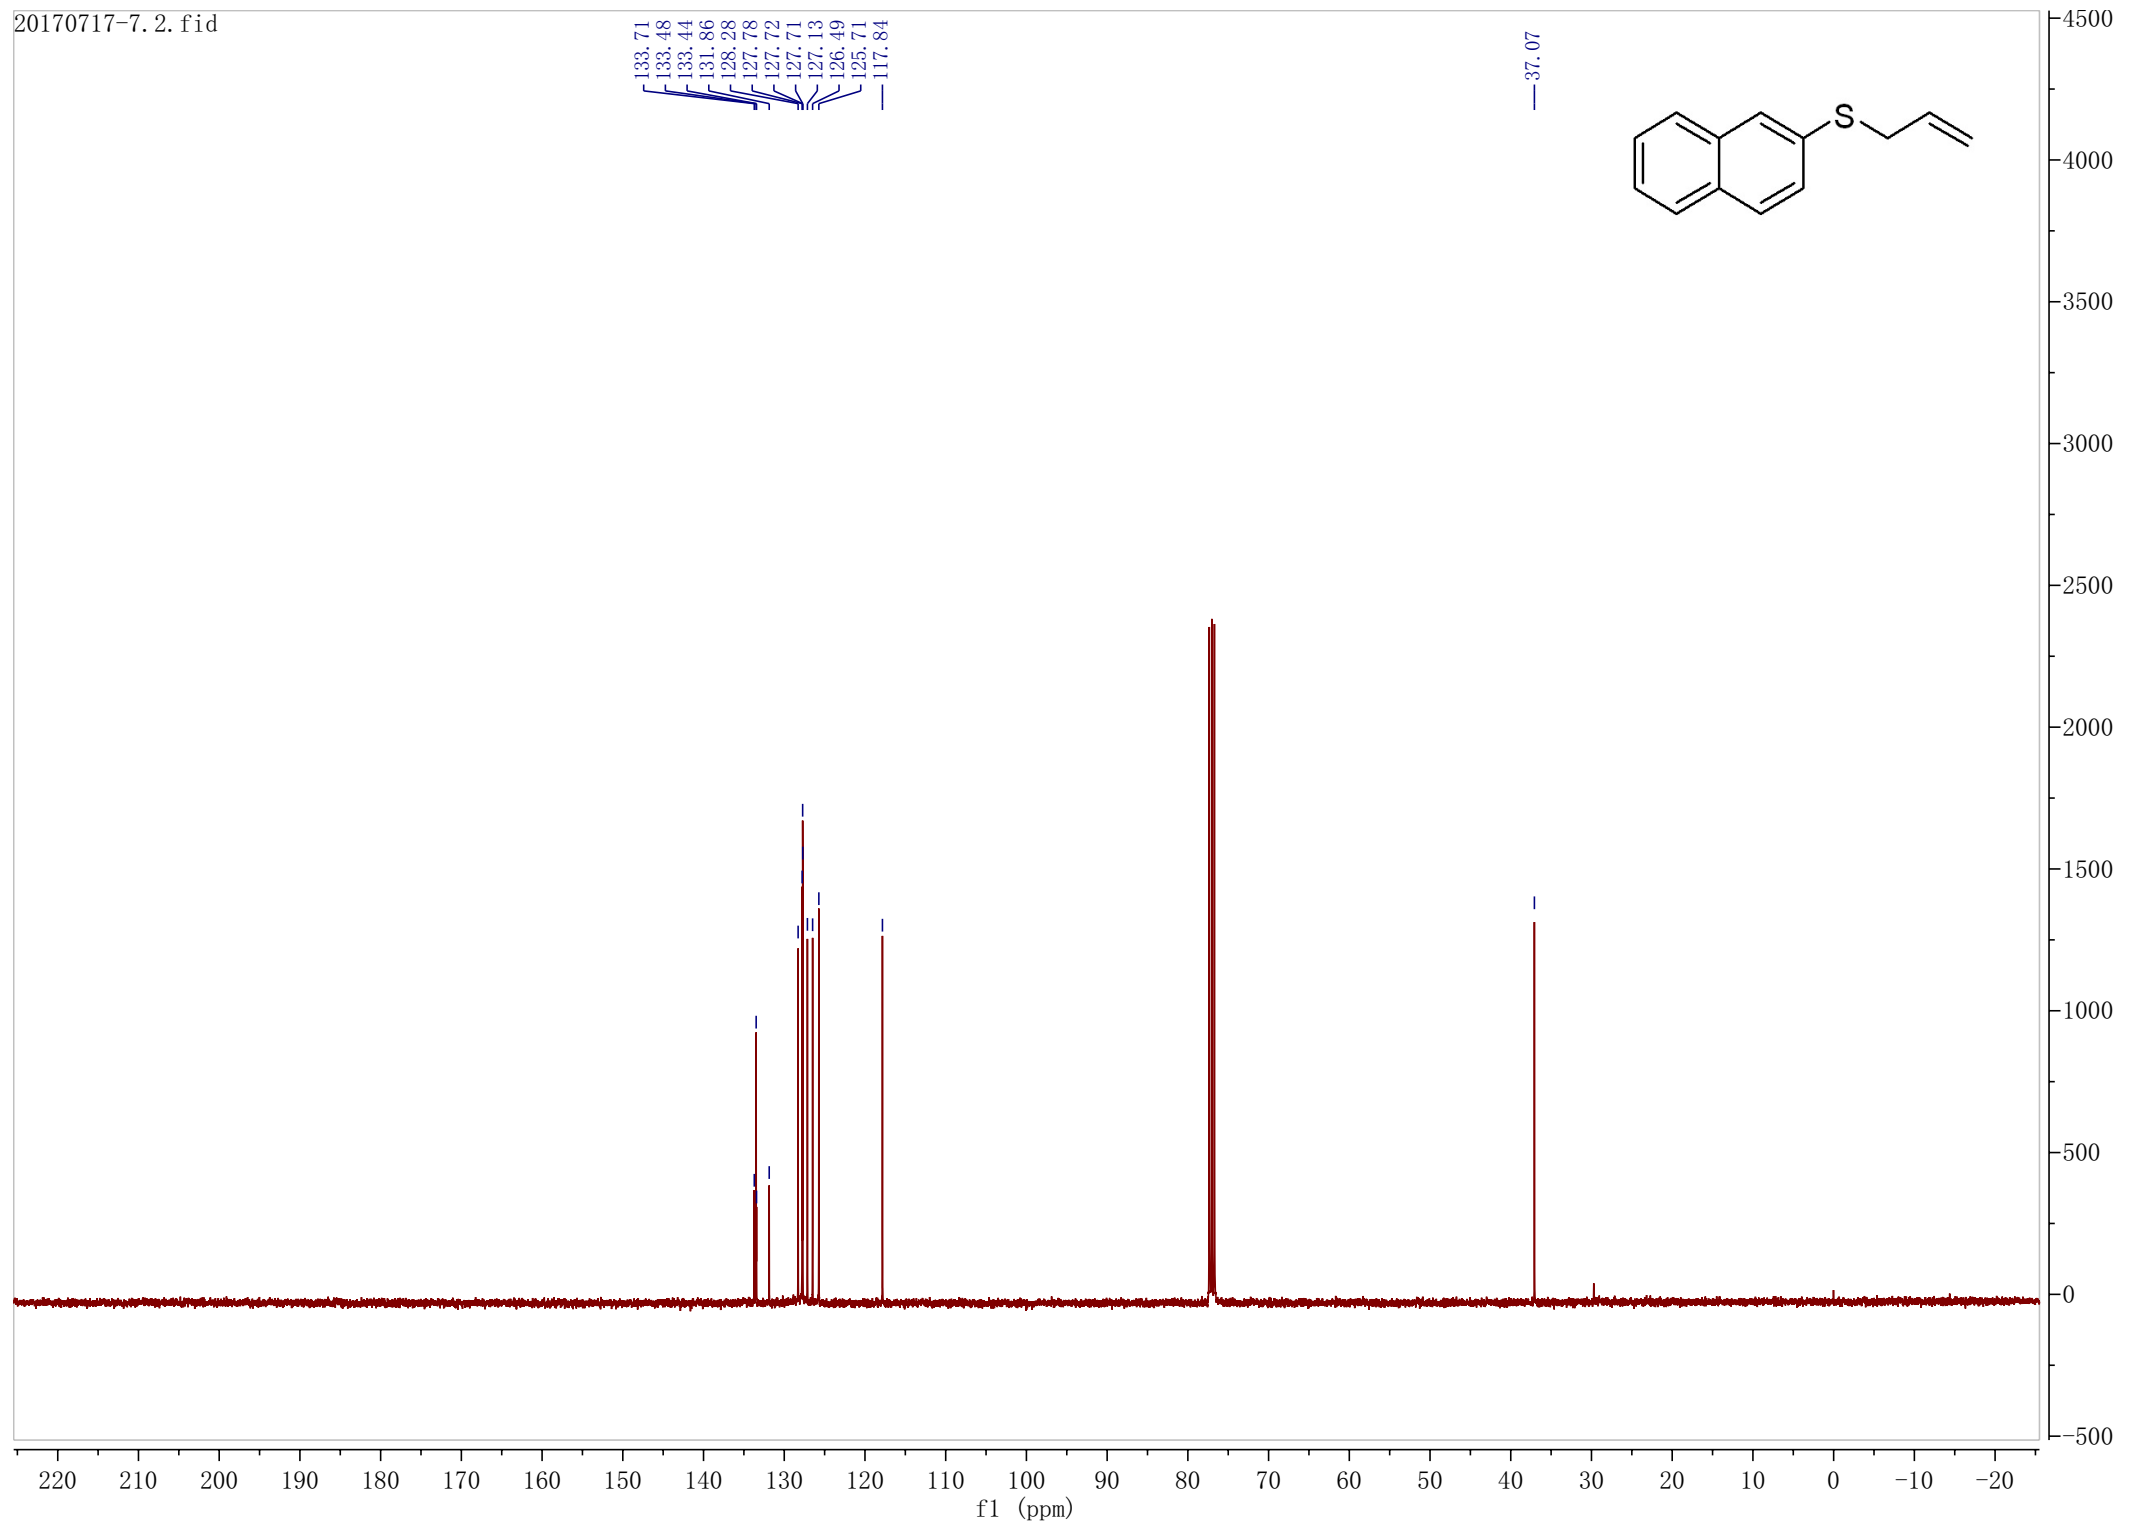

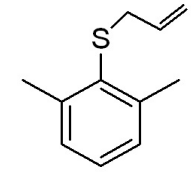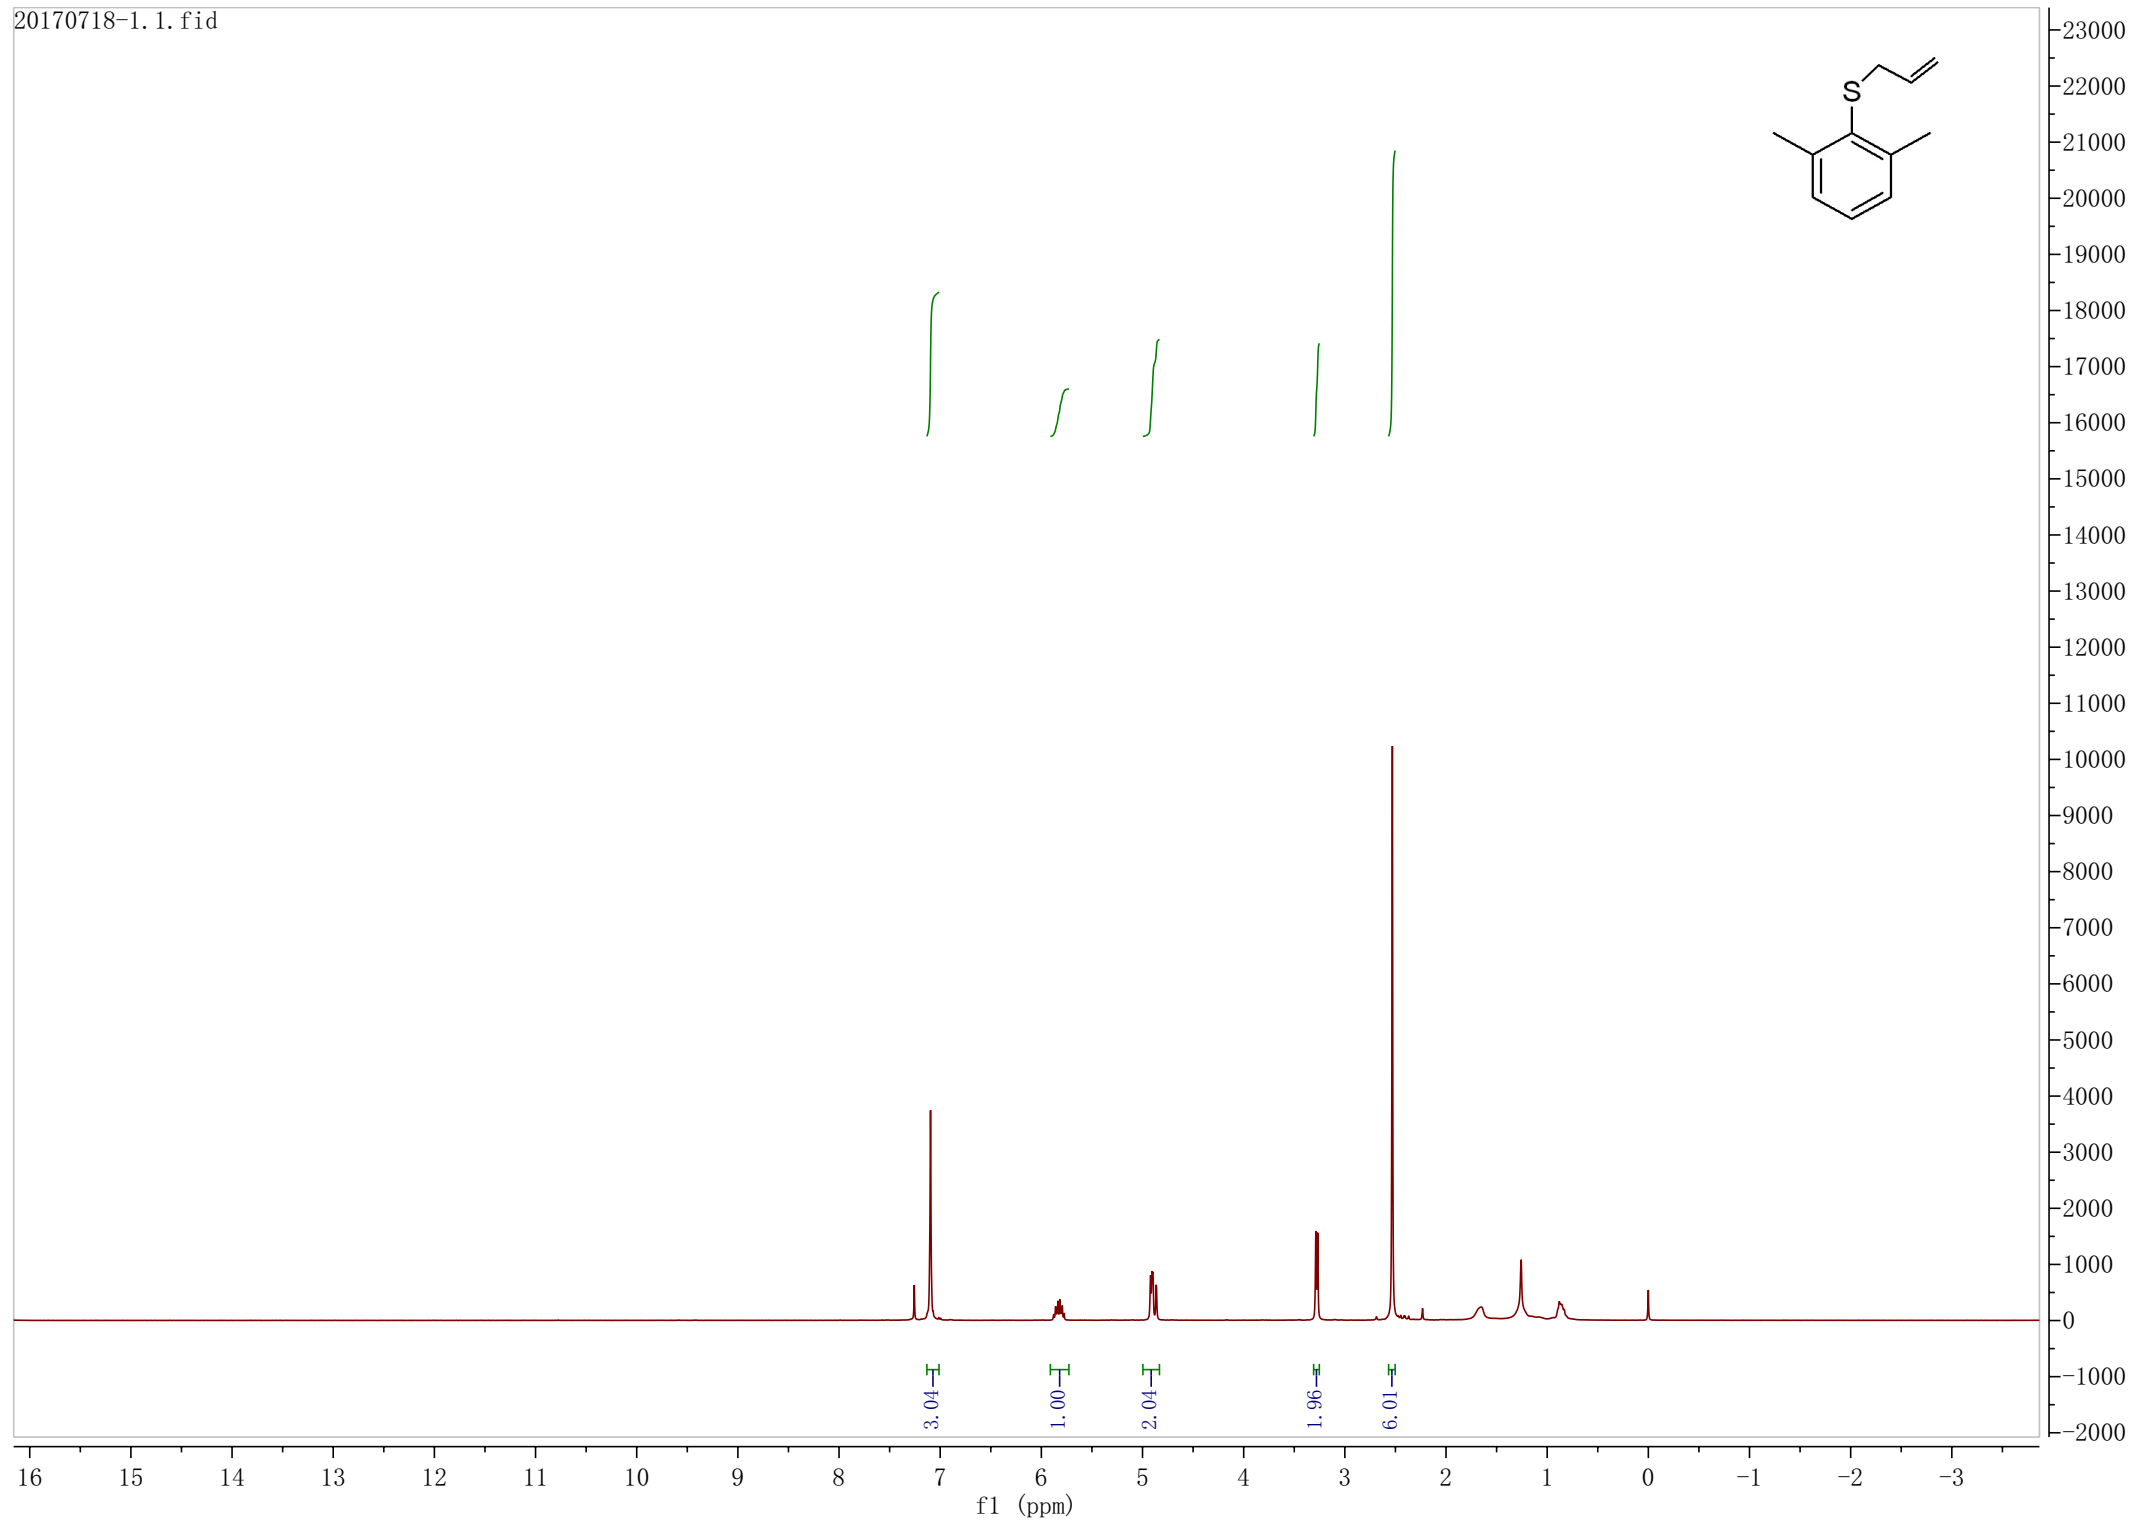

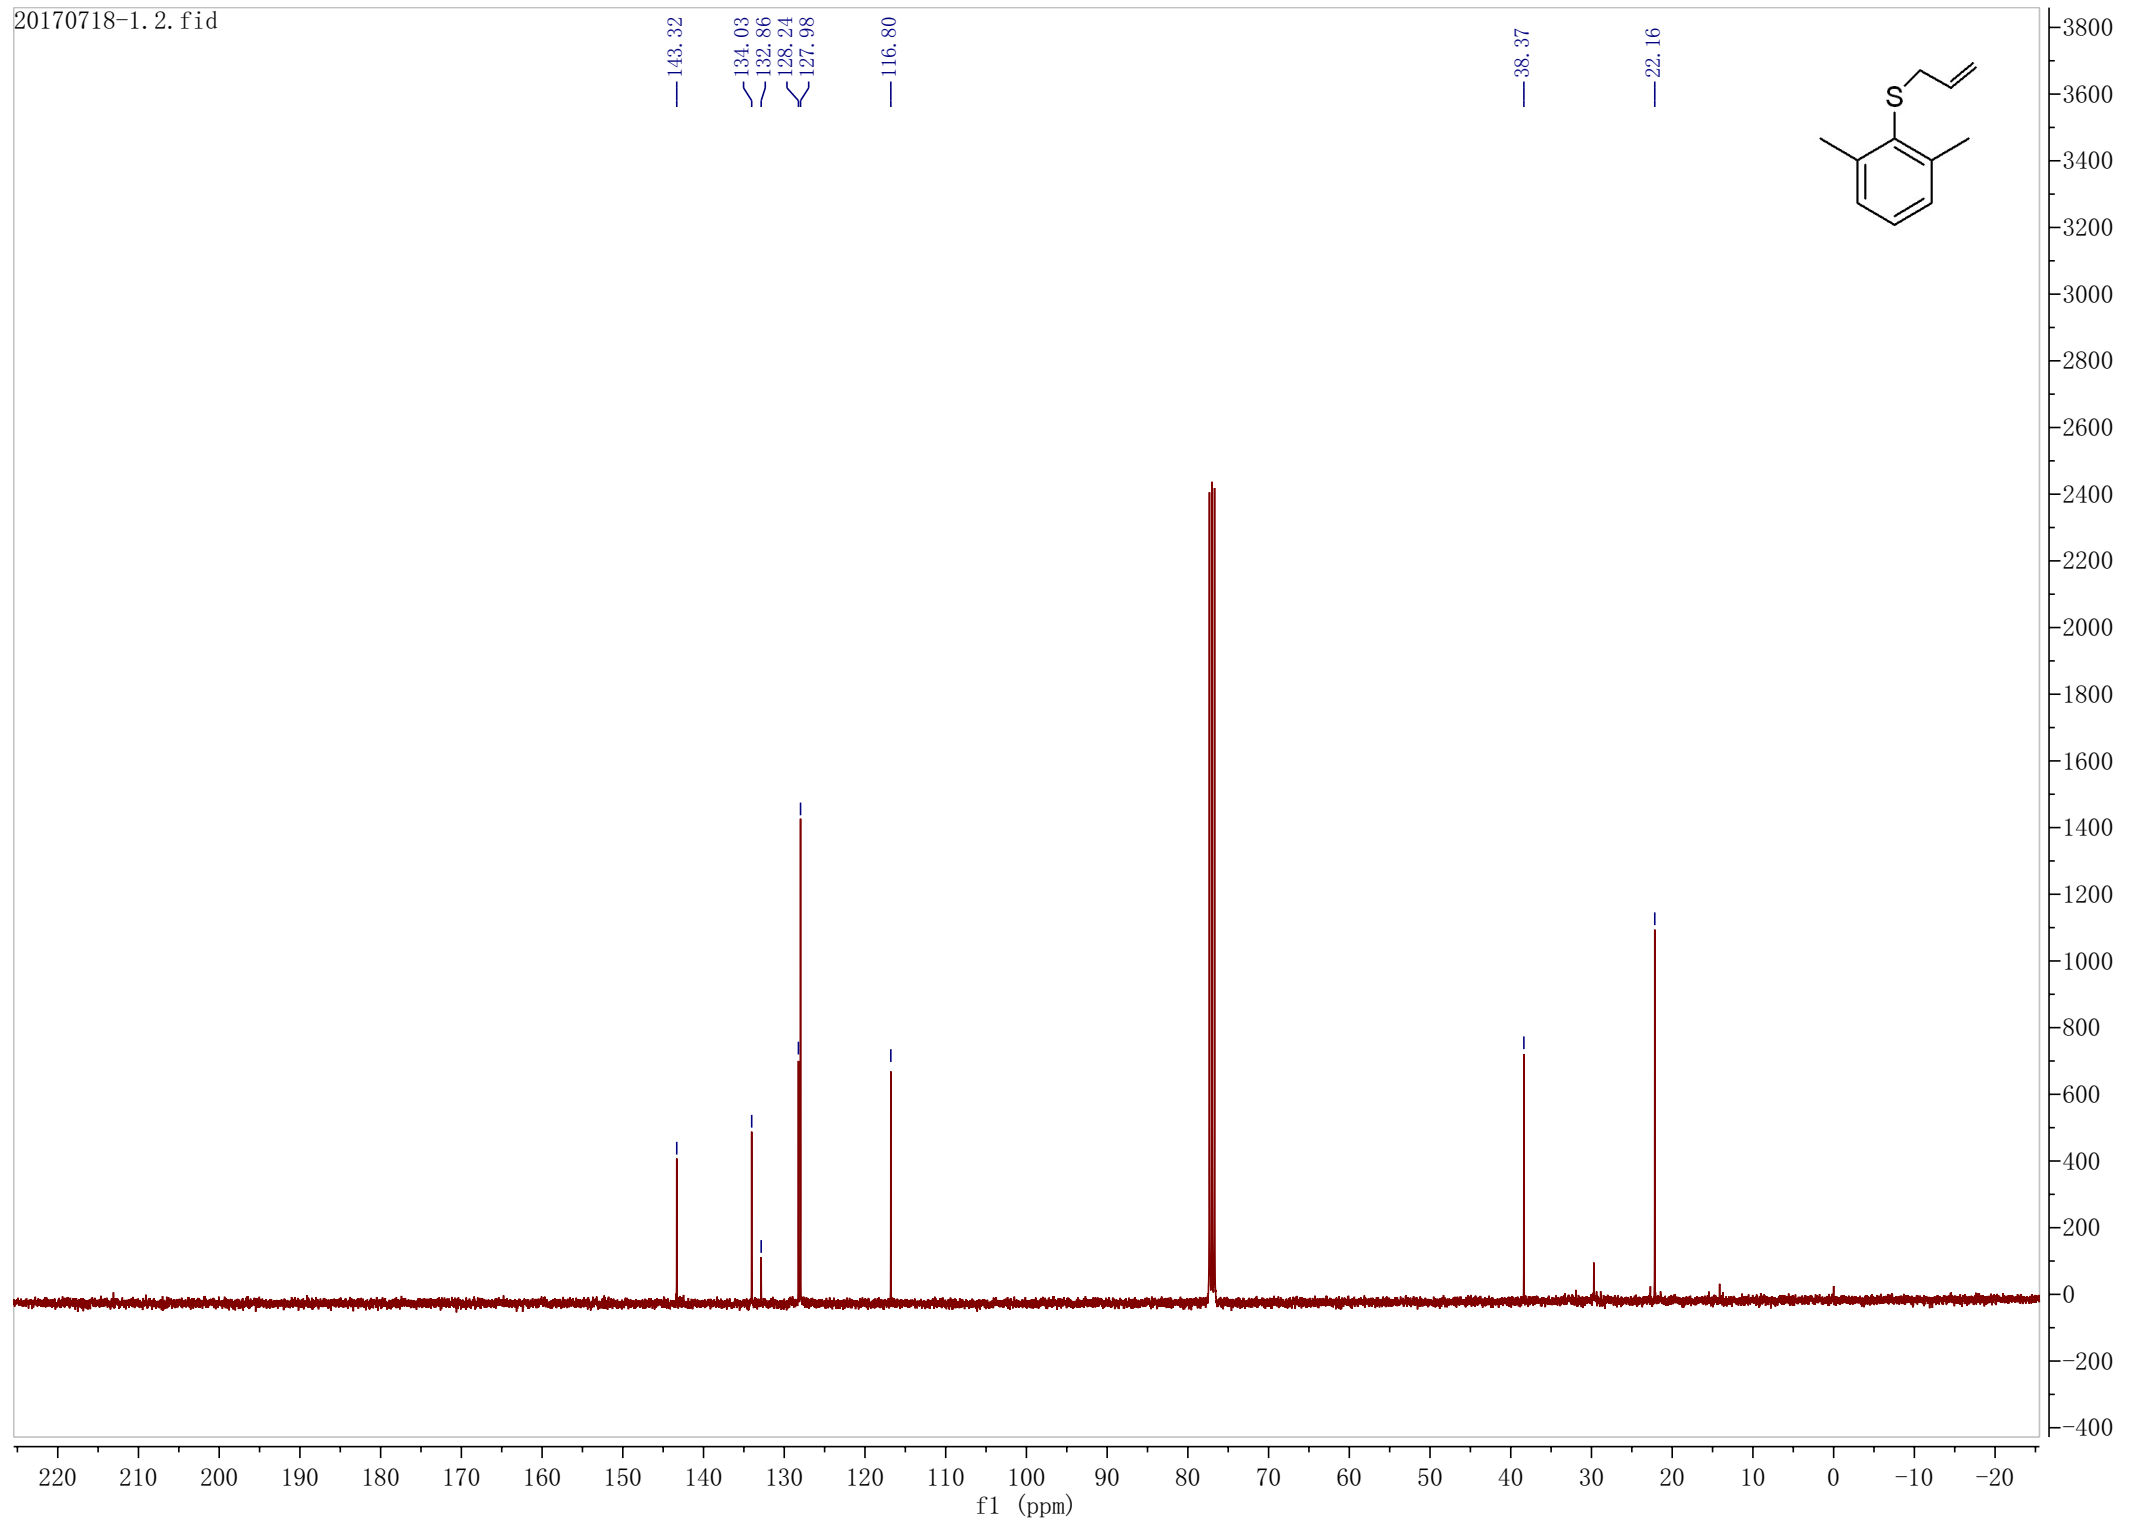

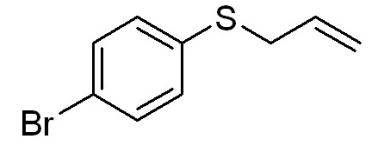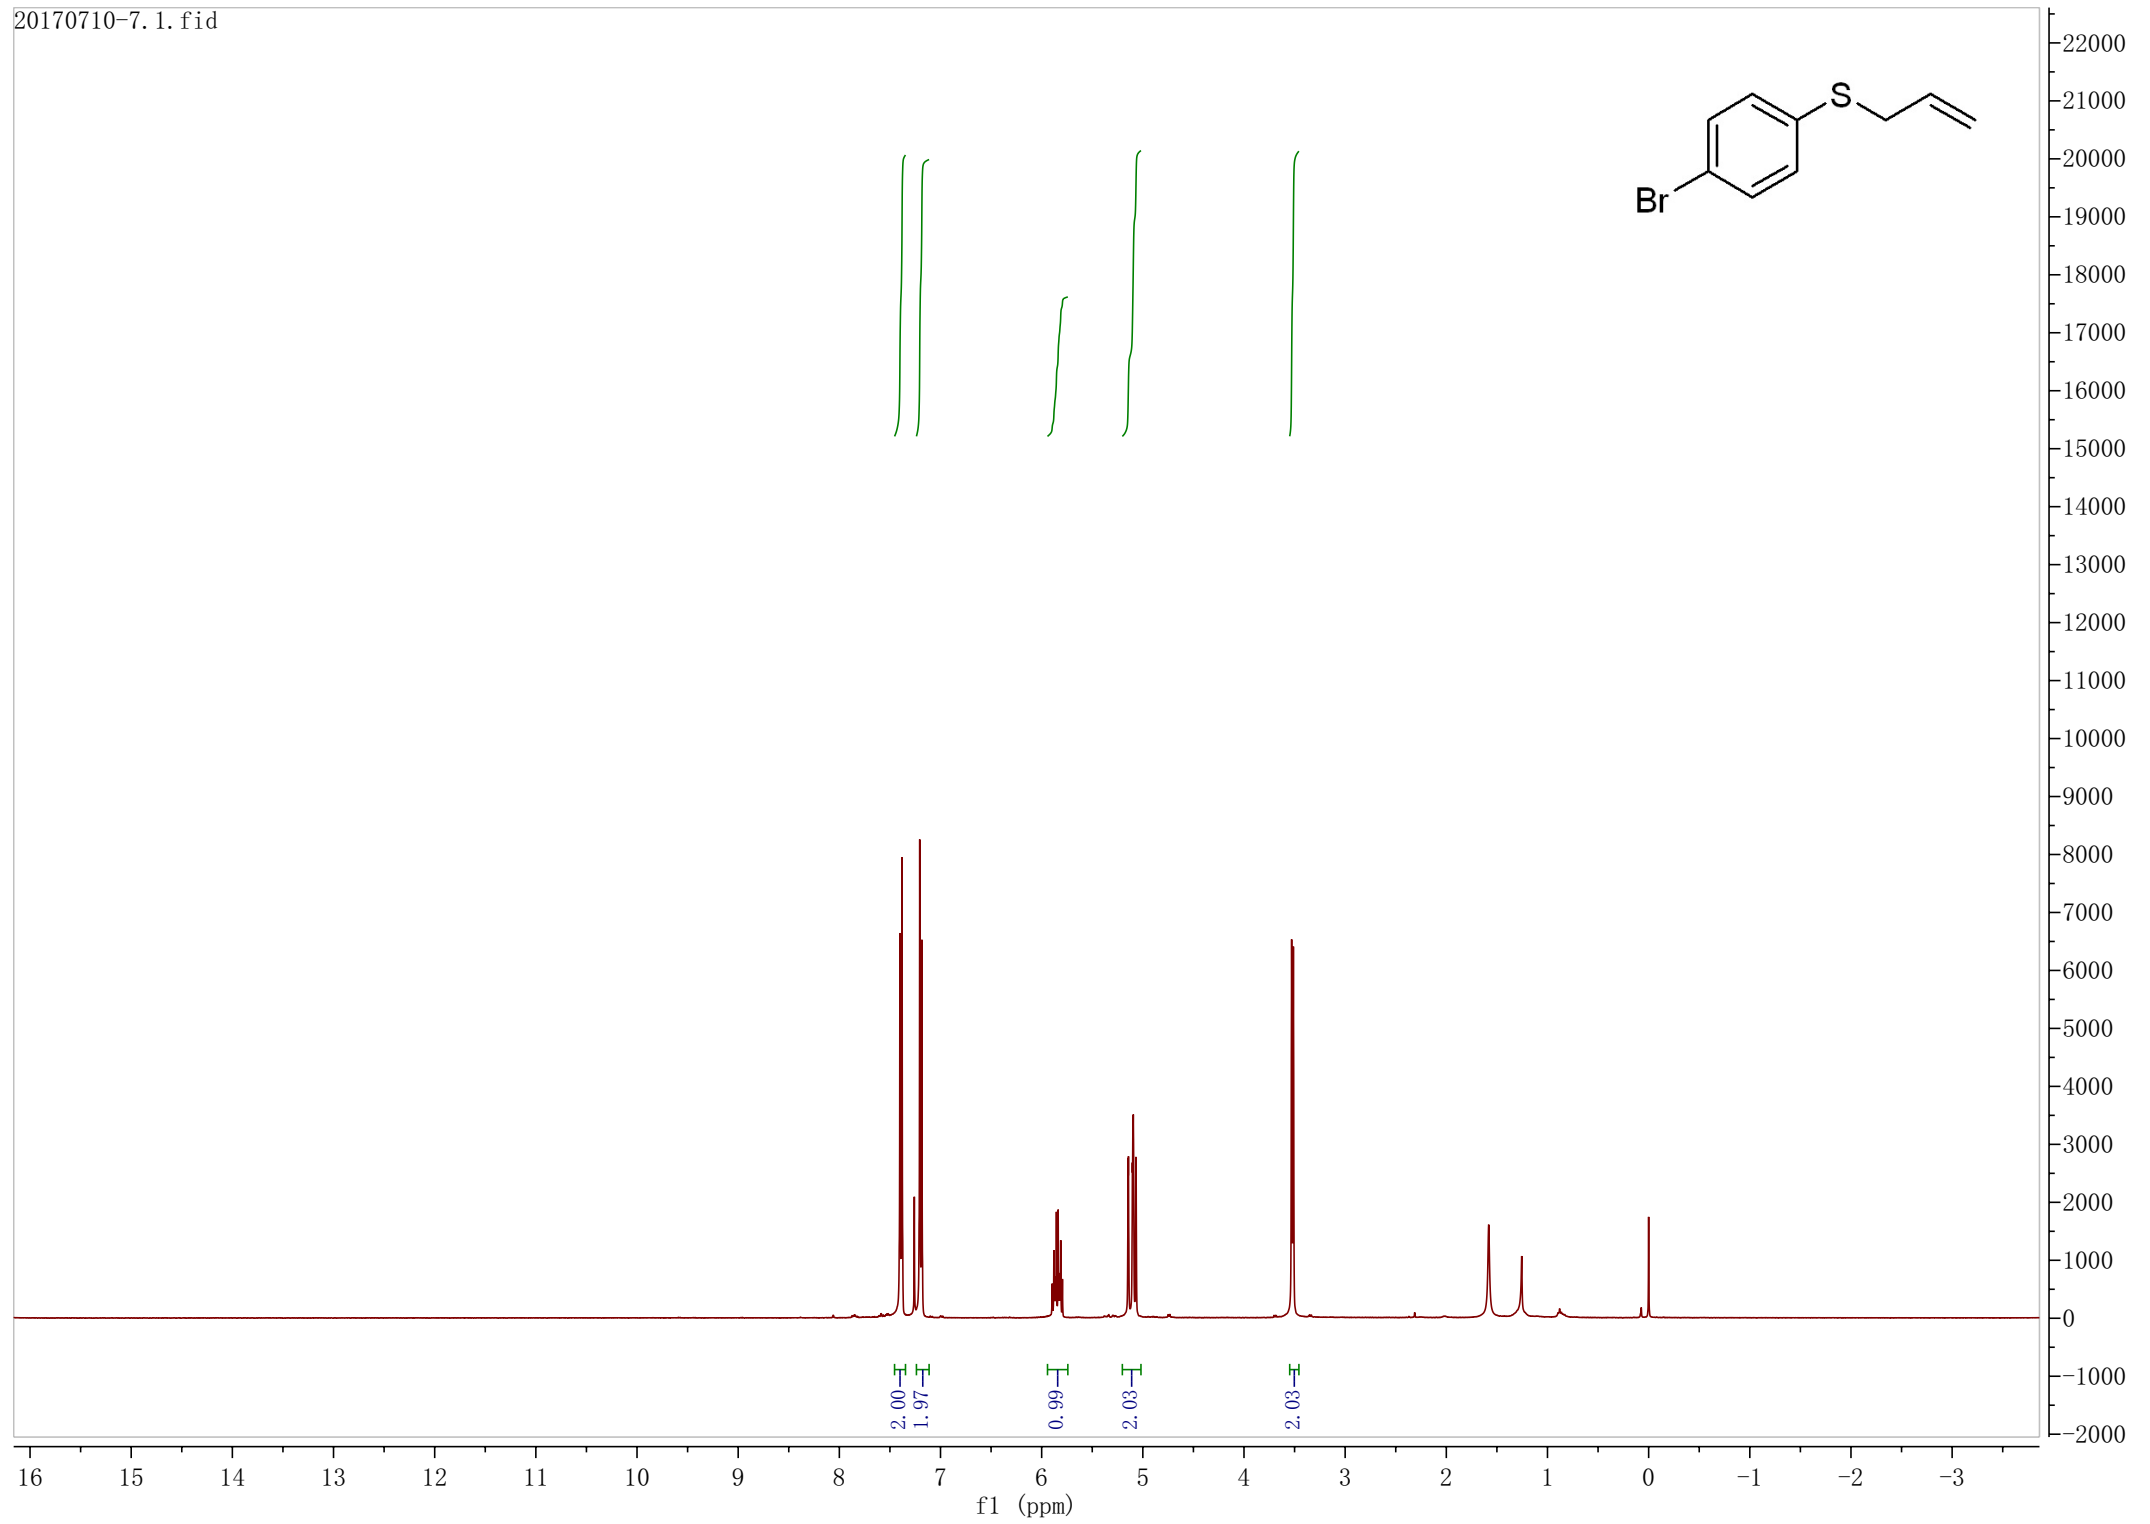



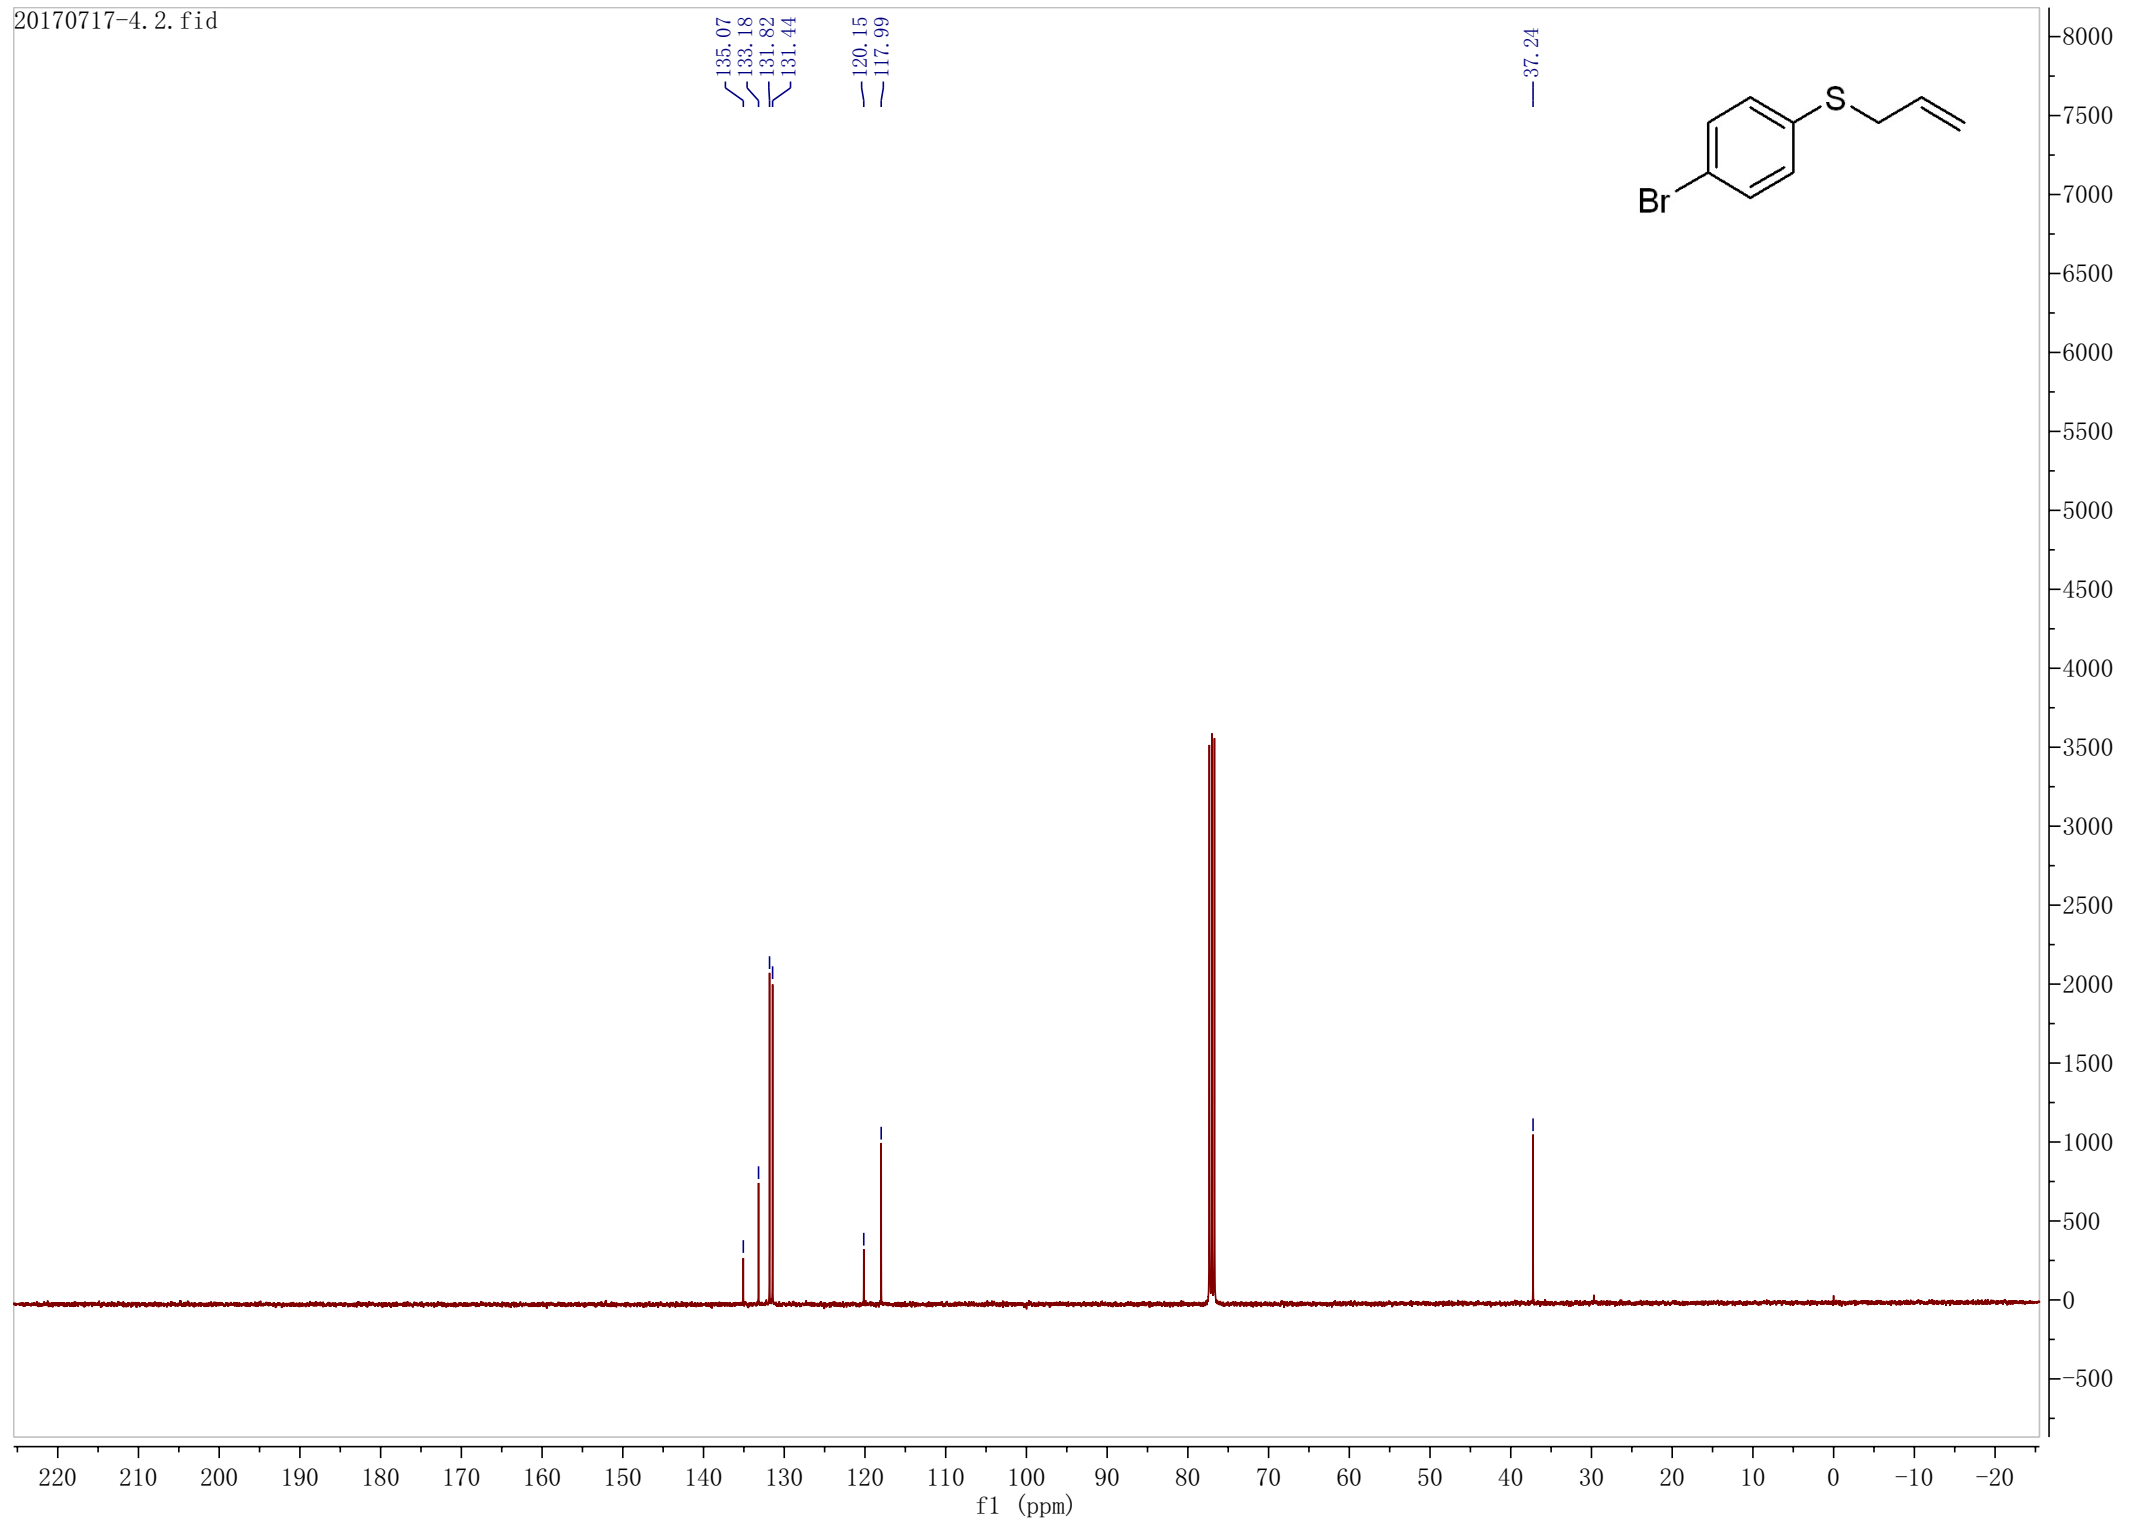

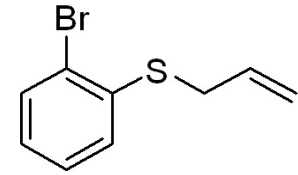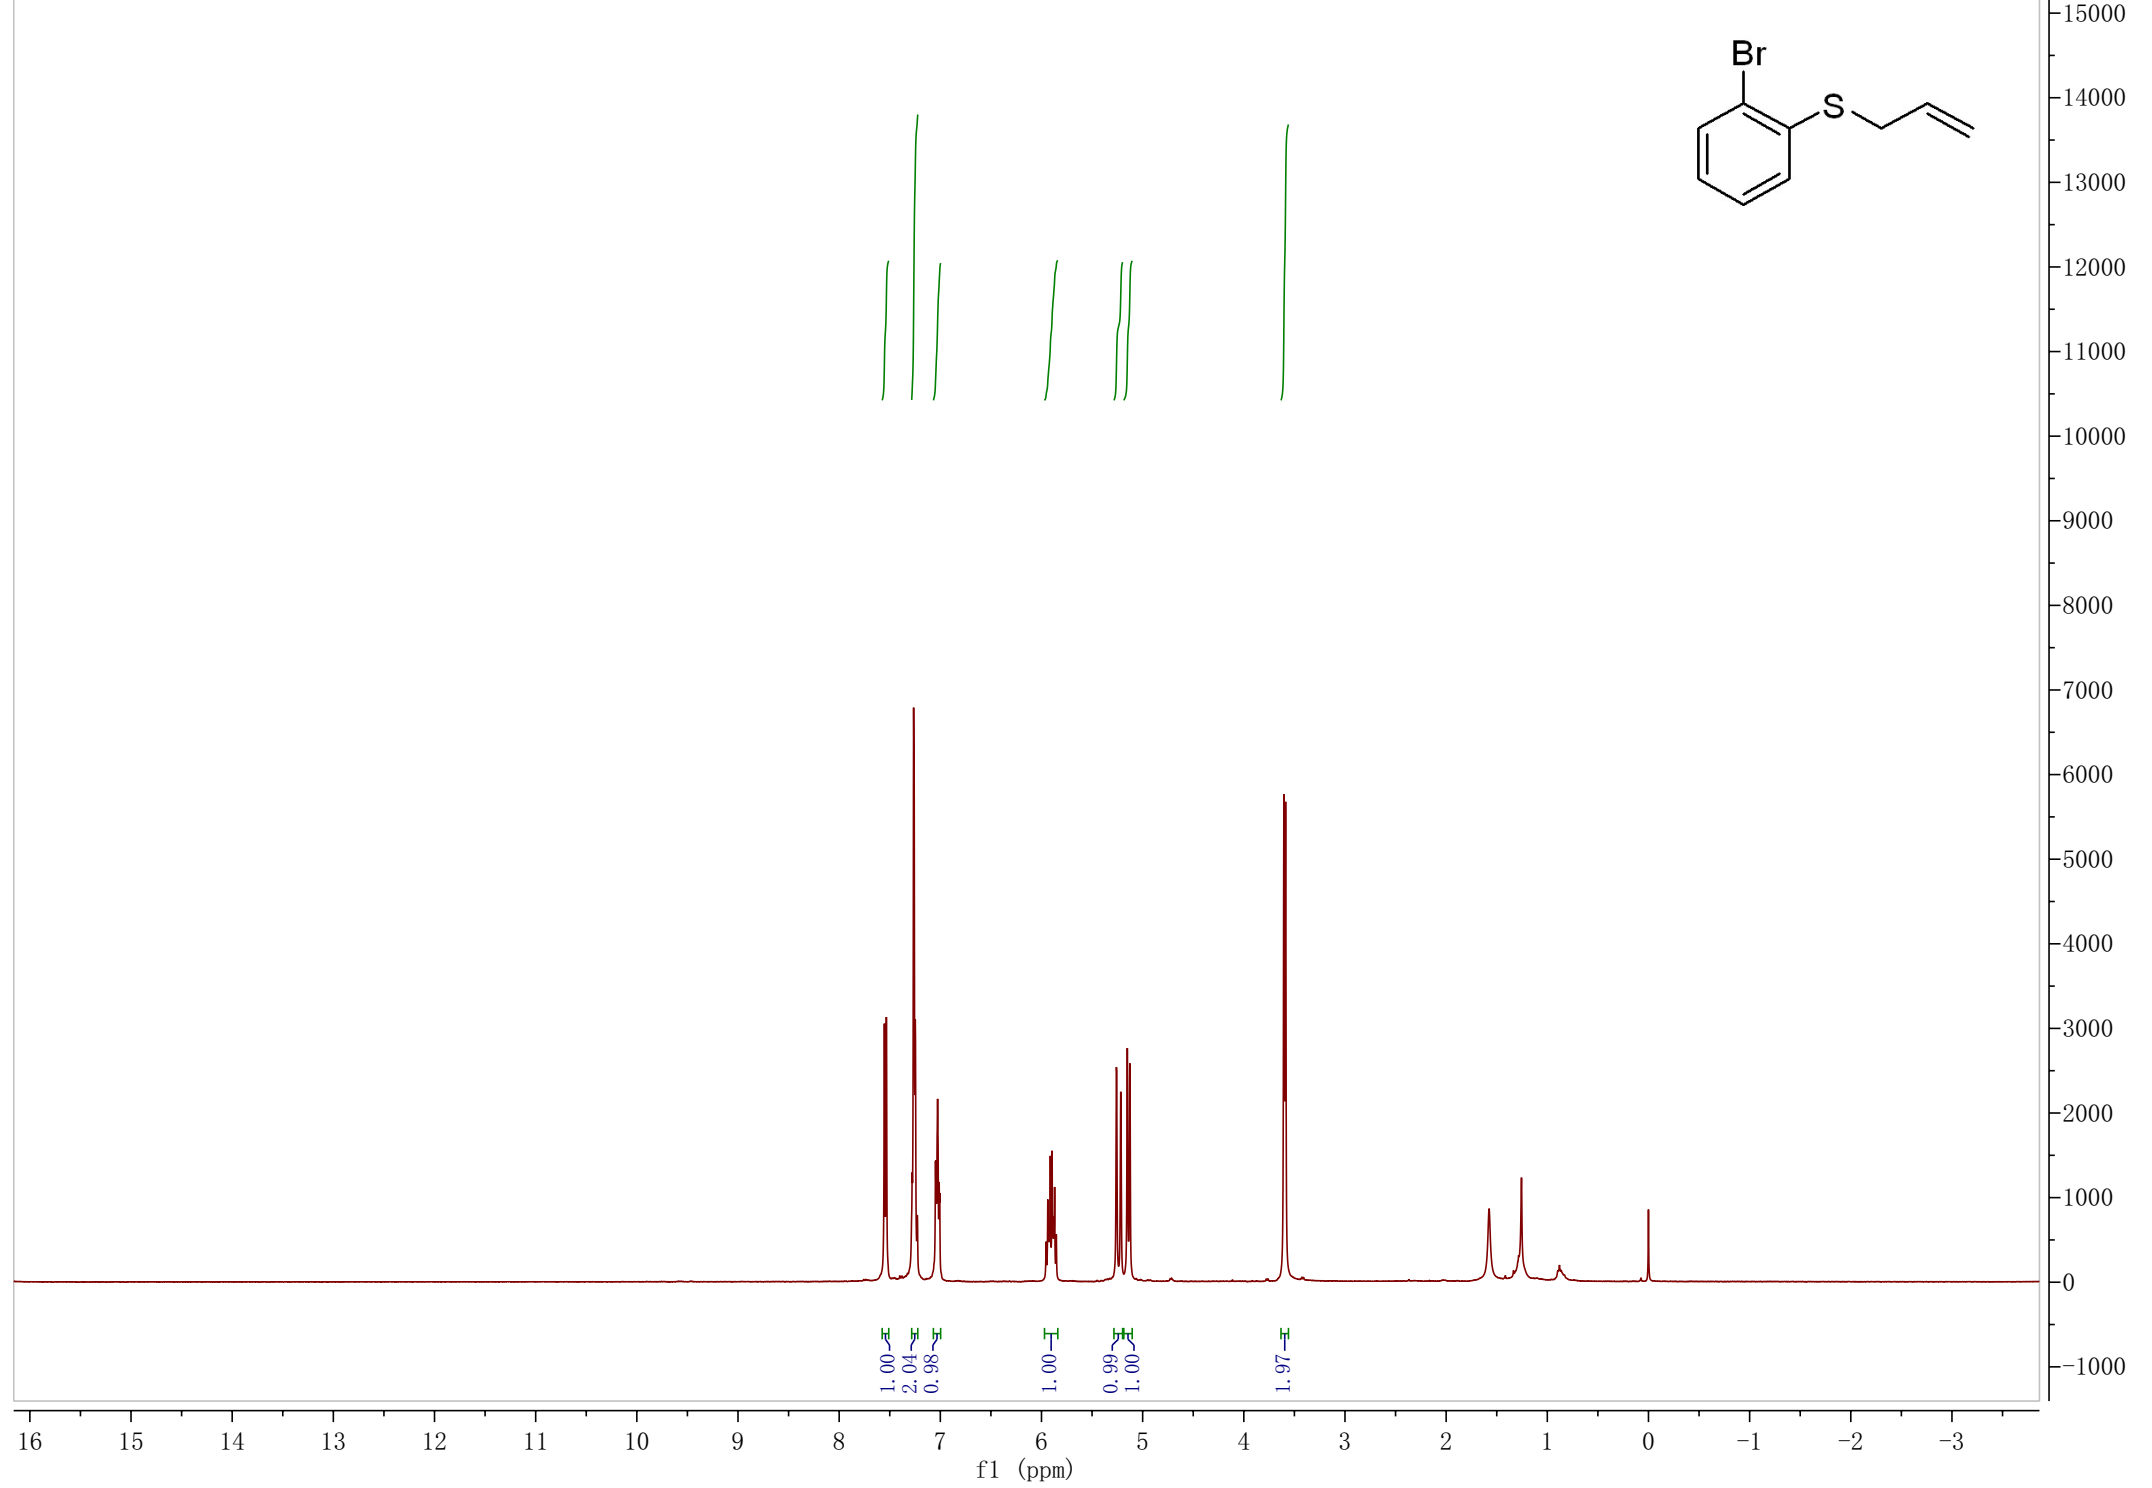

137.41  
132.96  
132.59  
128.91  
127.60  
126.82  
123.89  
118.48

36.16

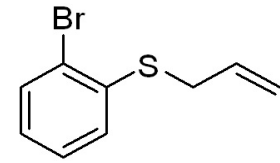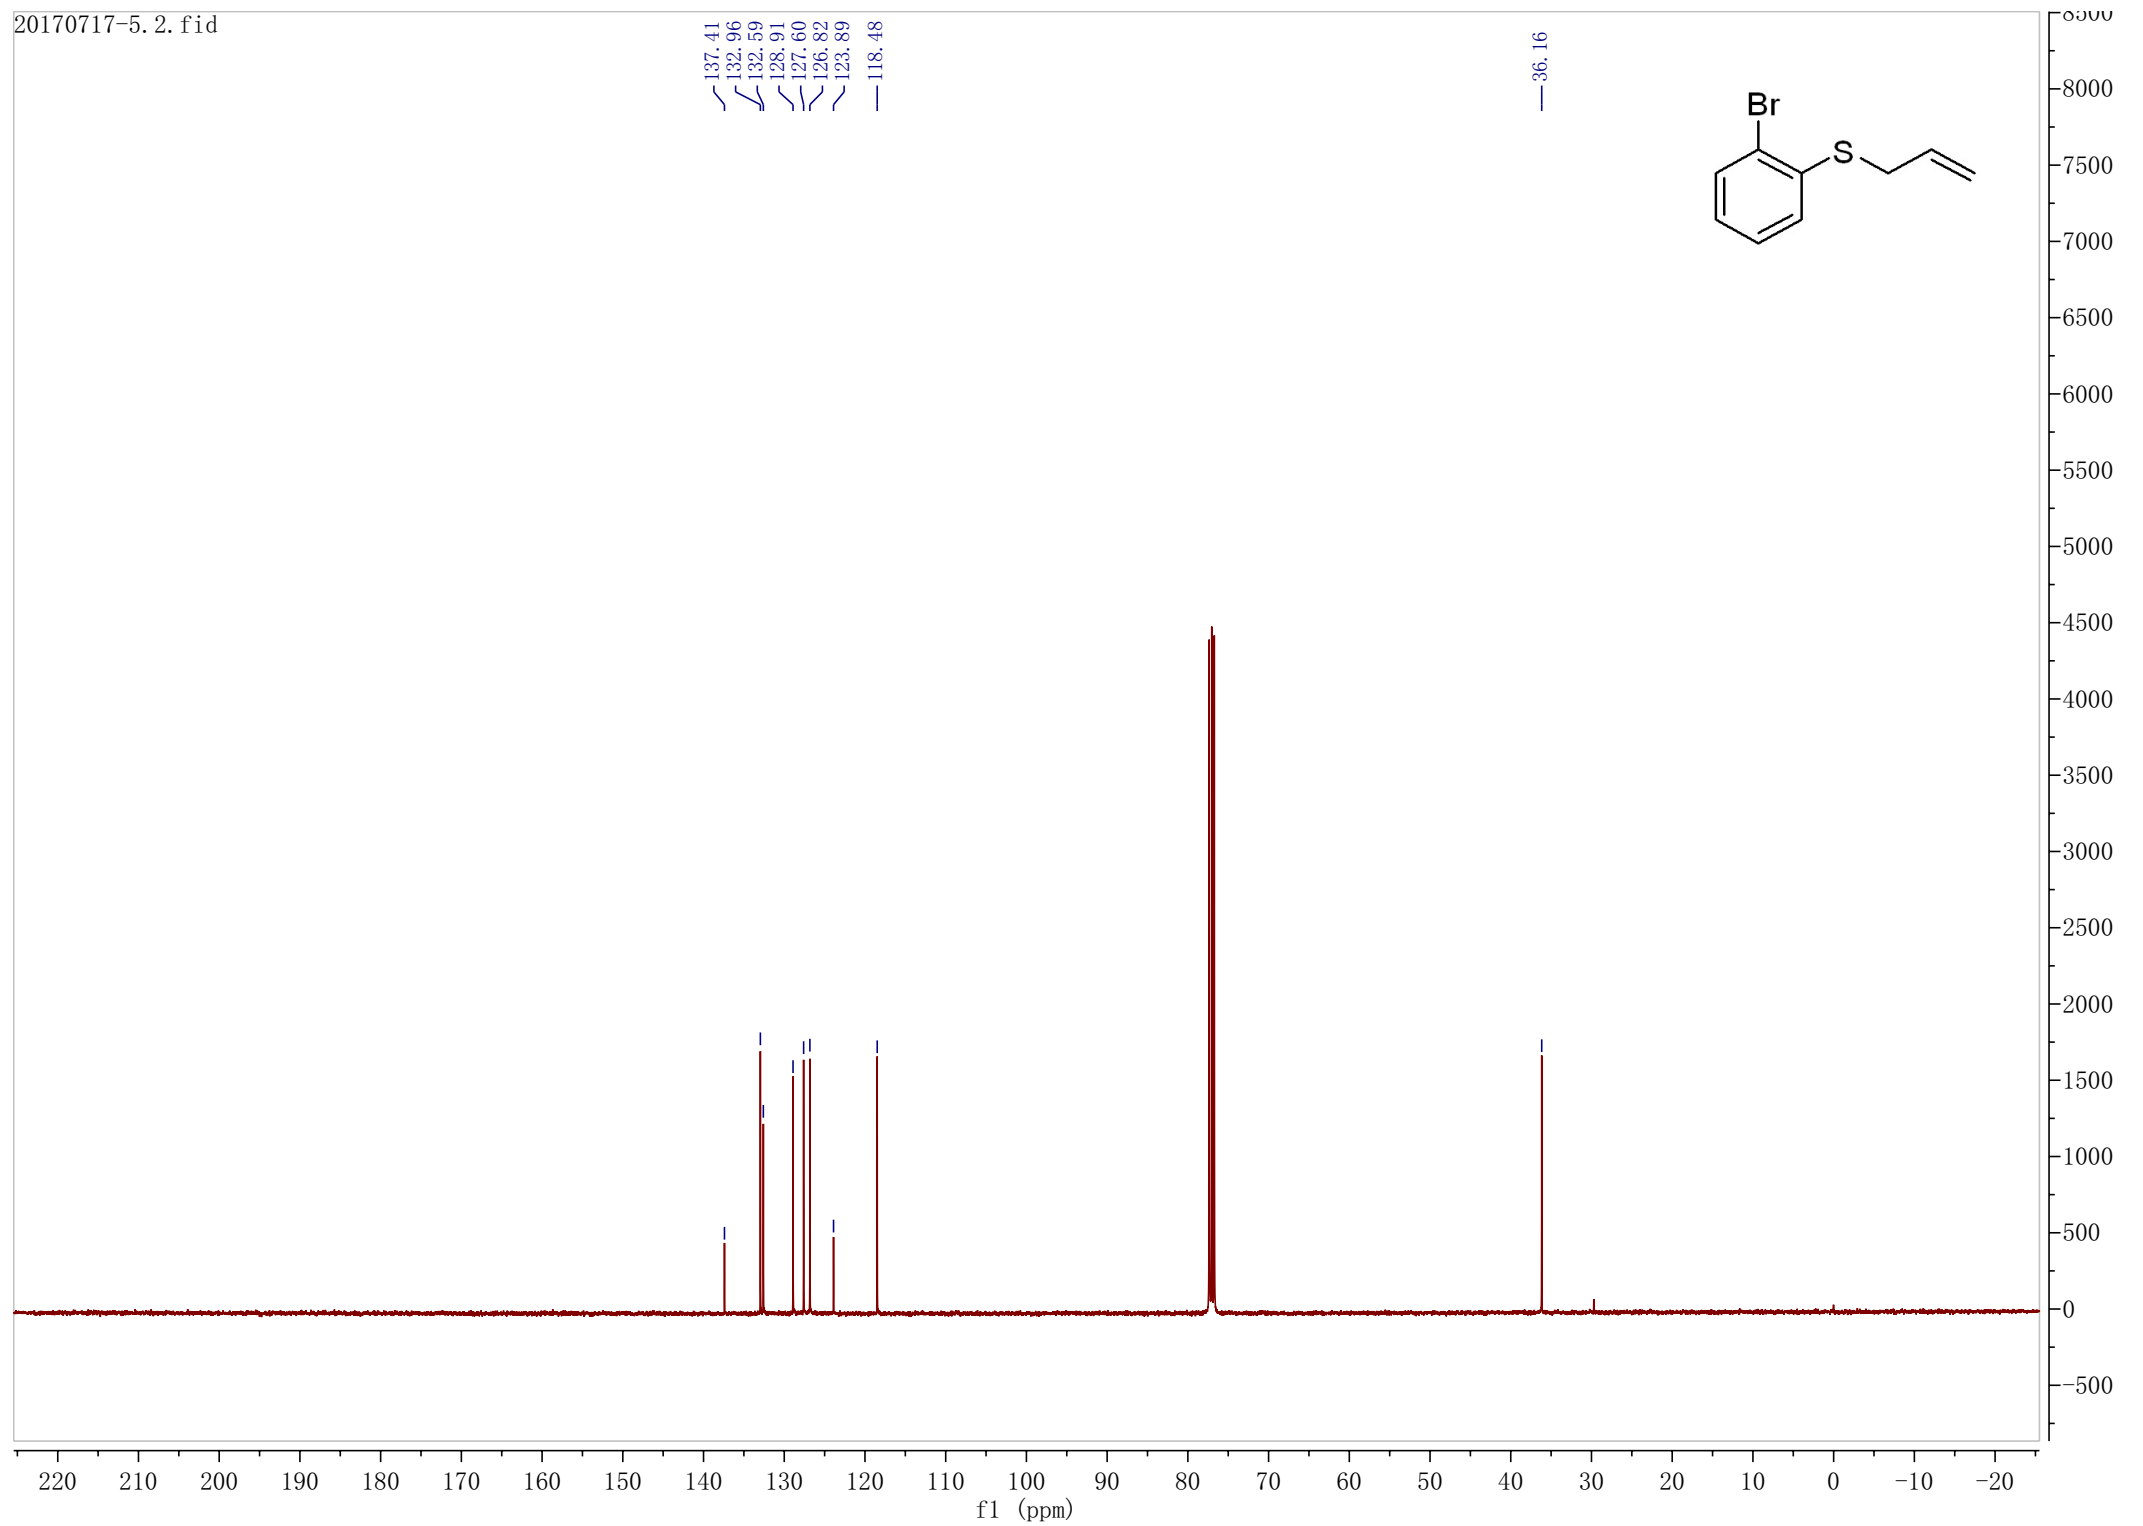

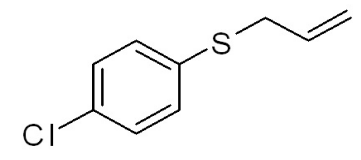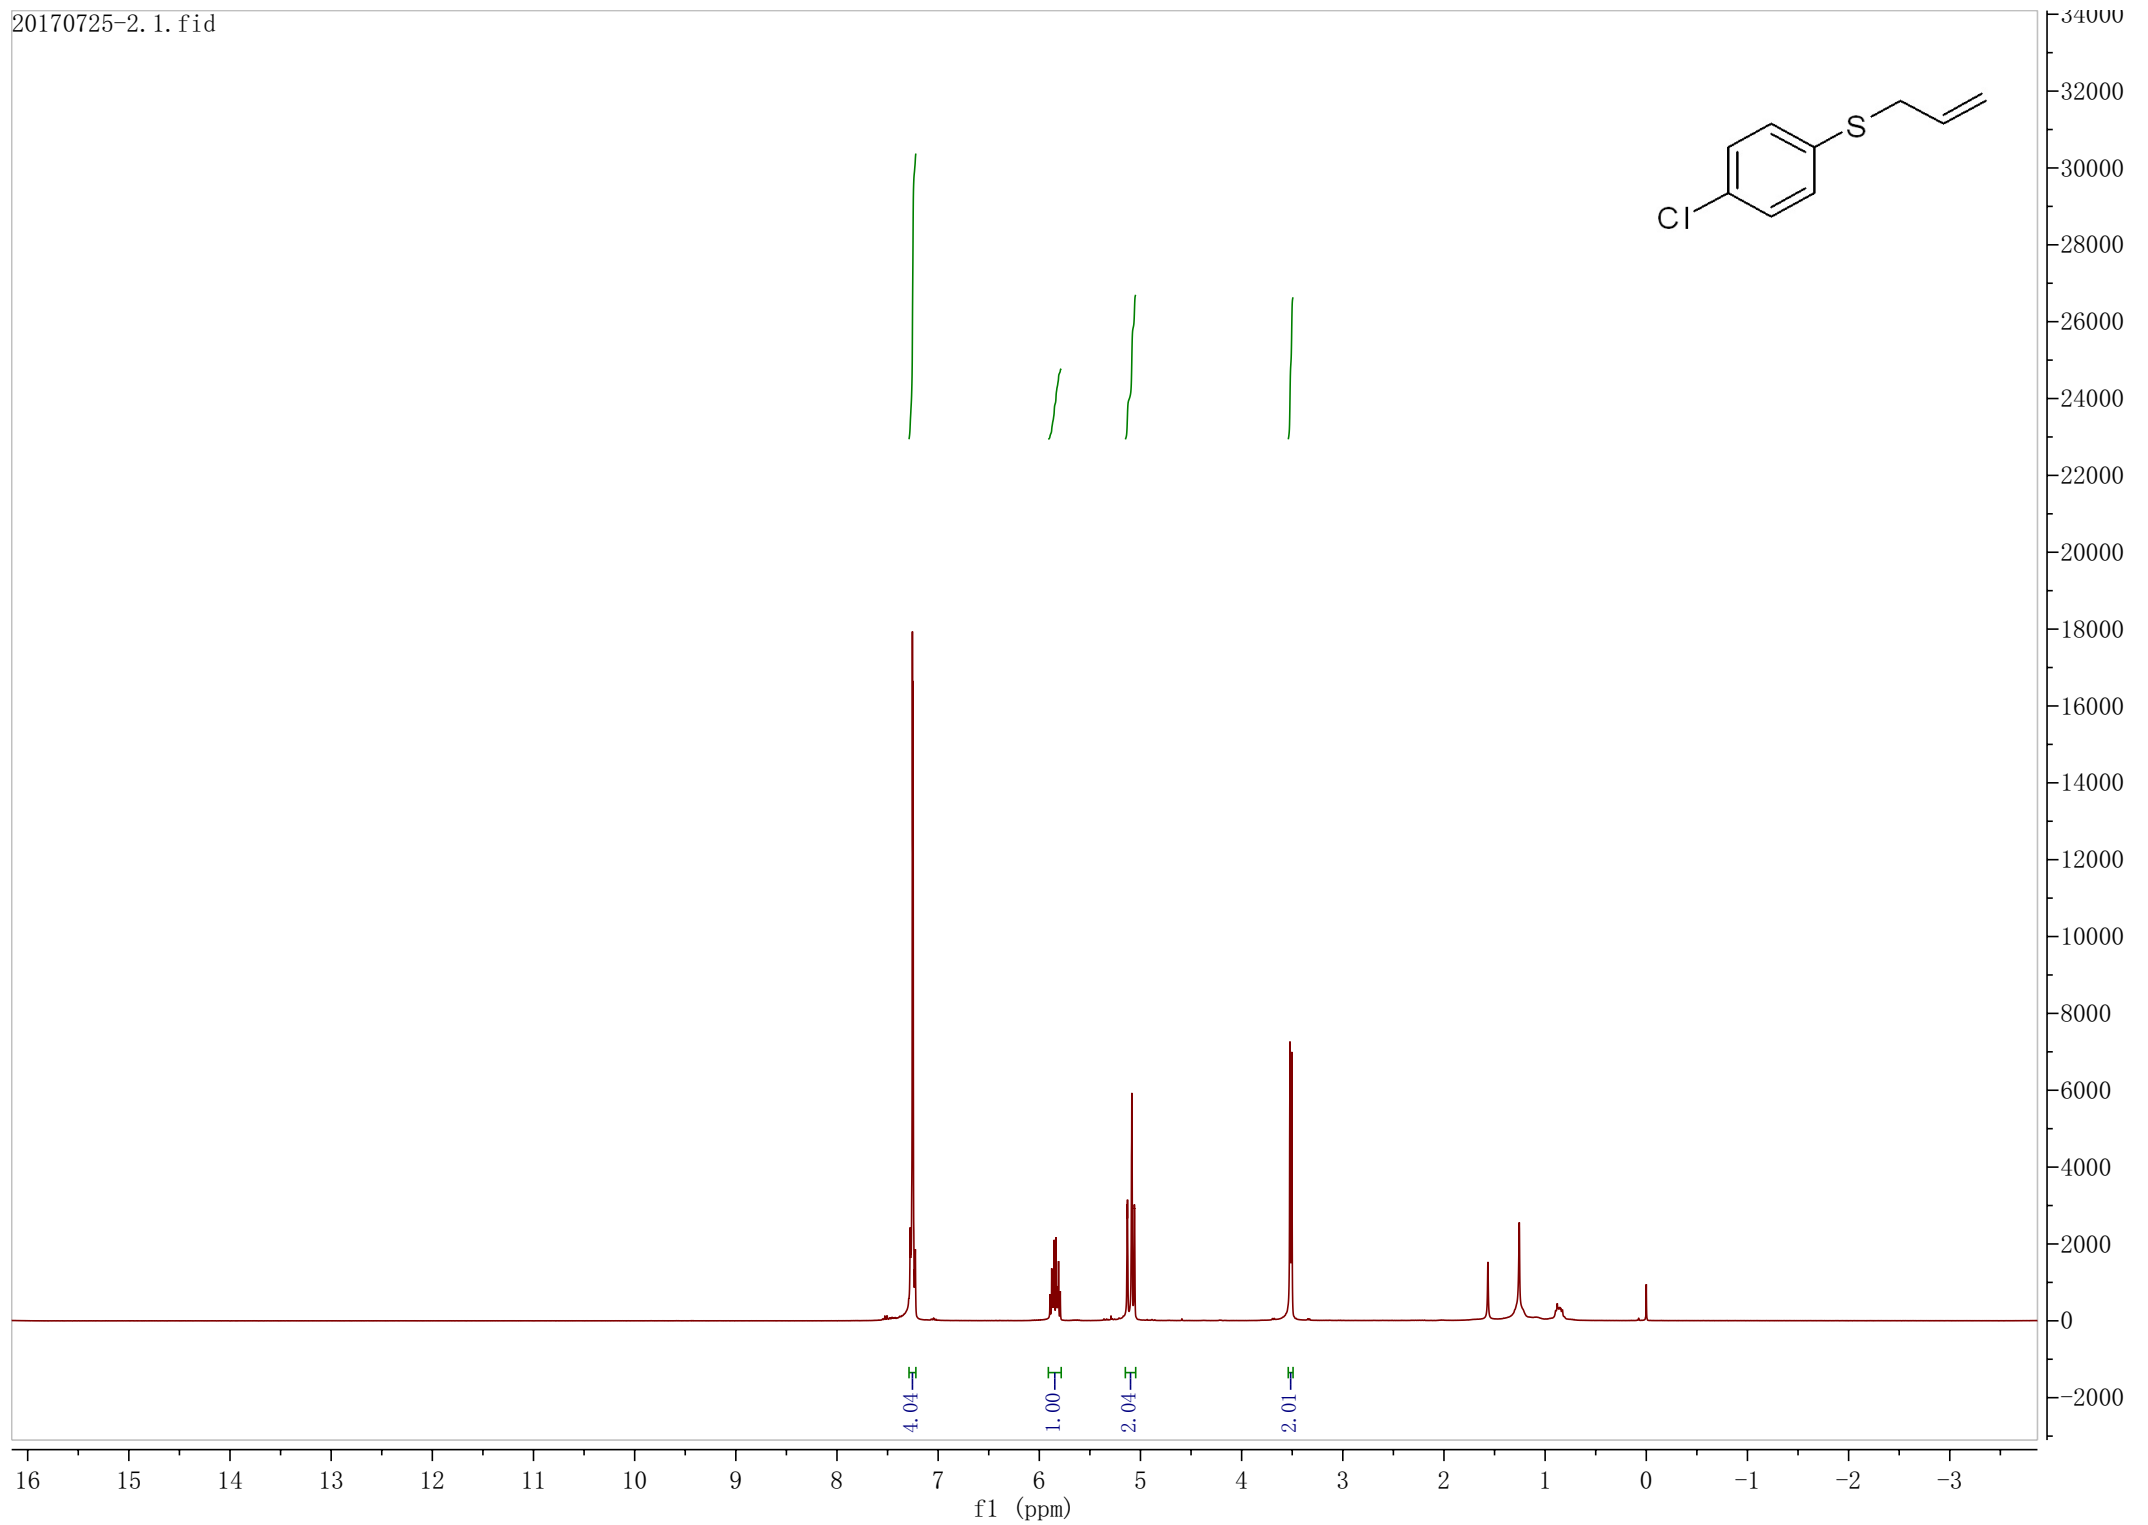

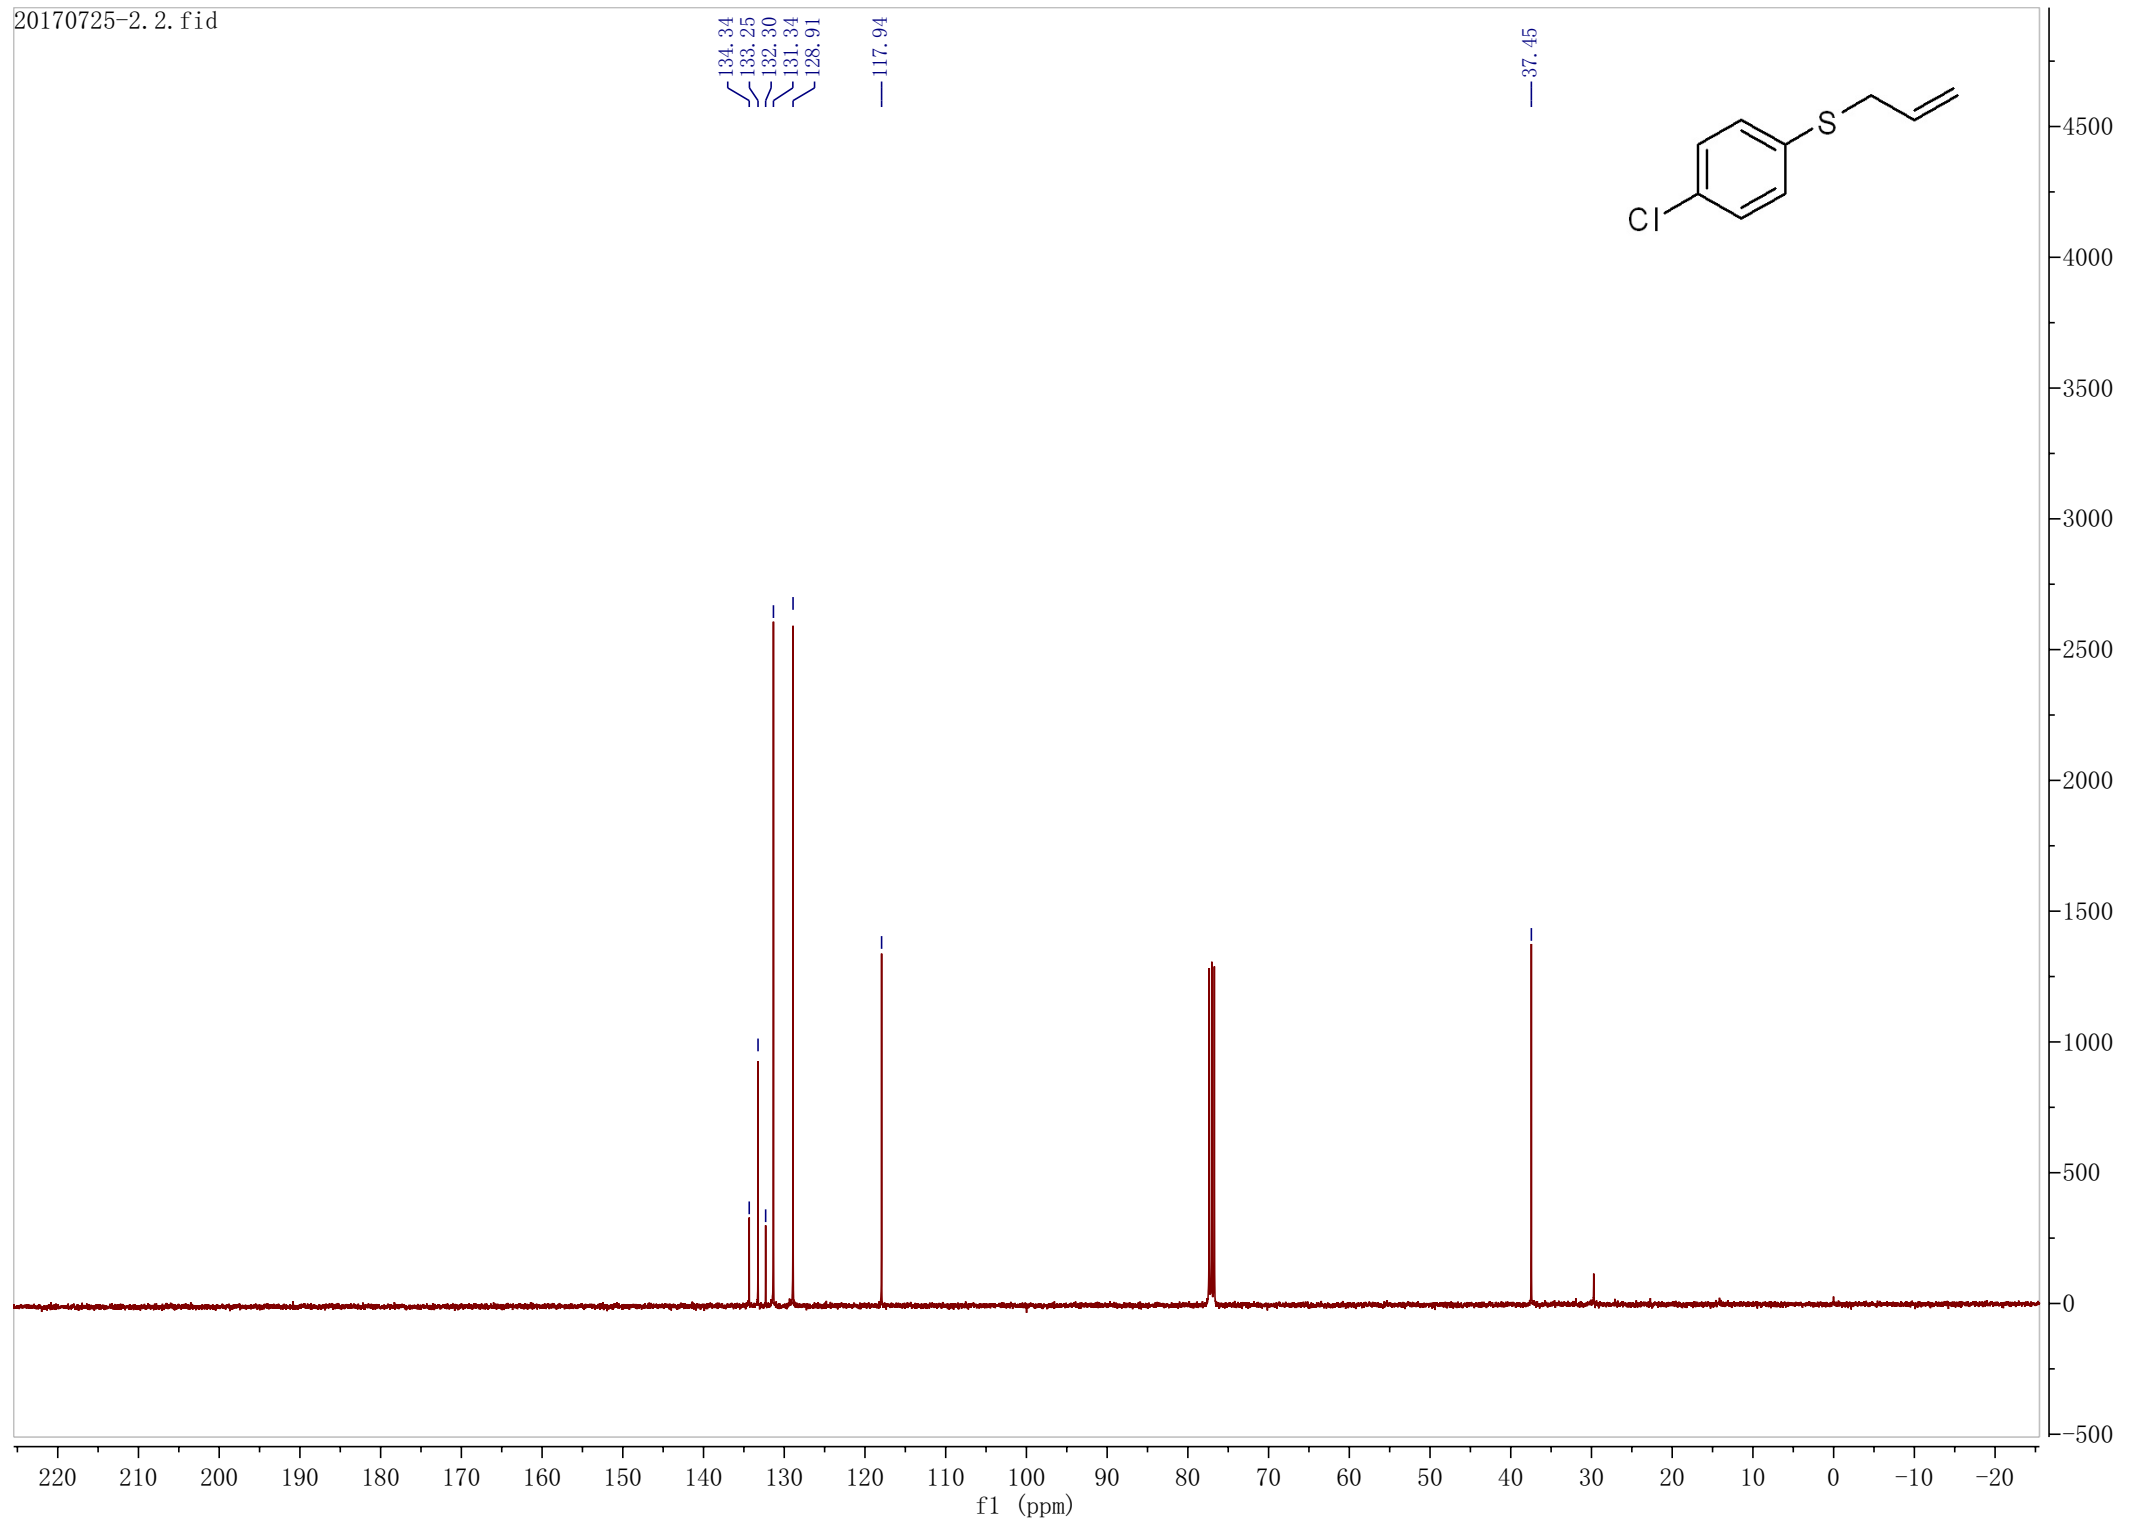

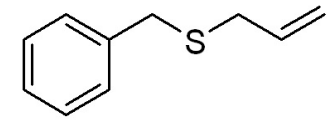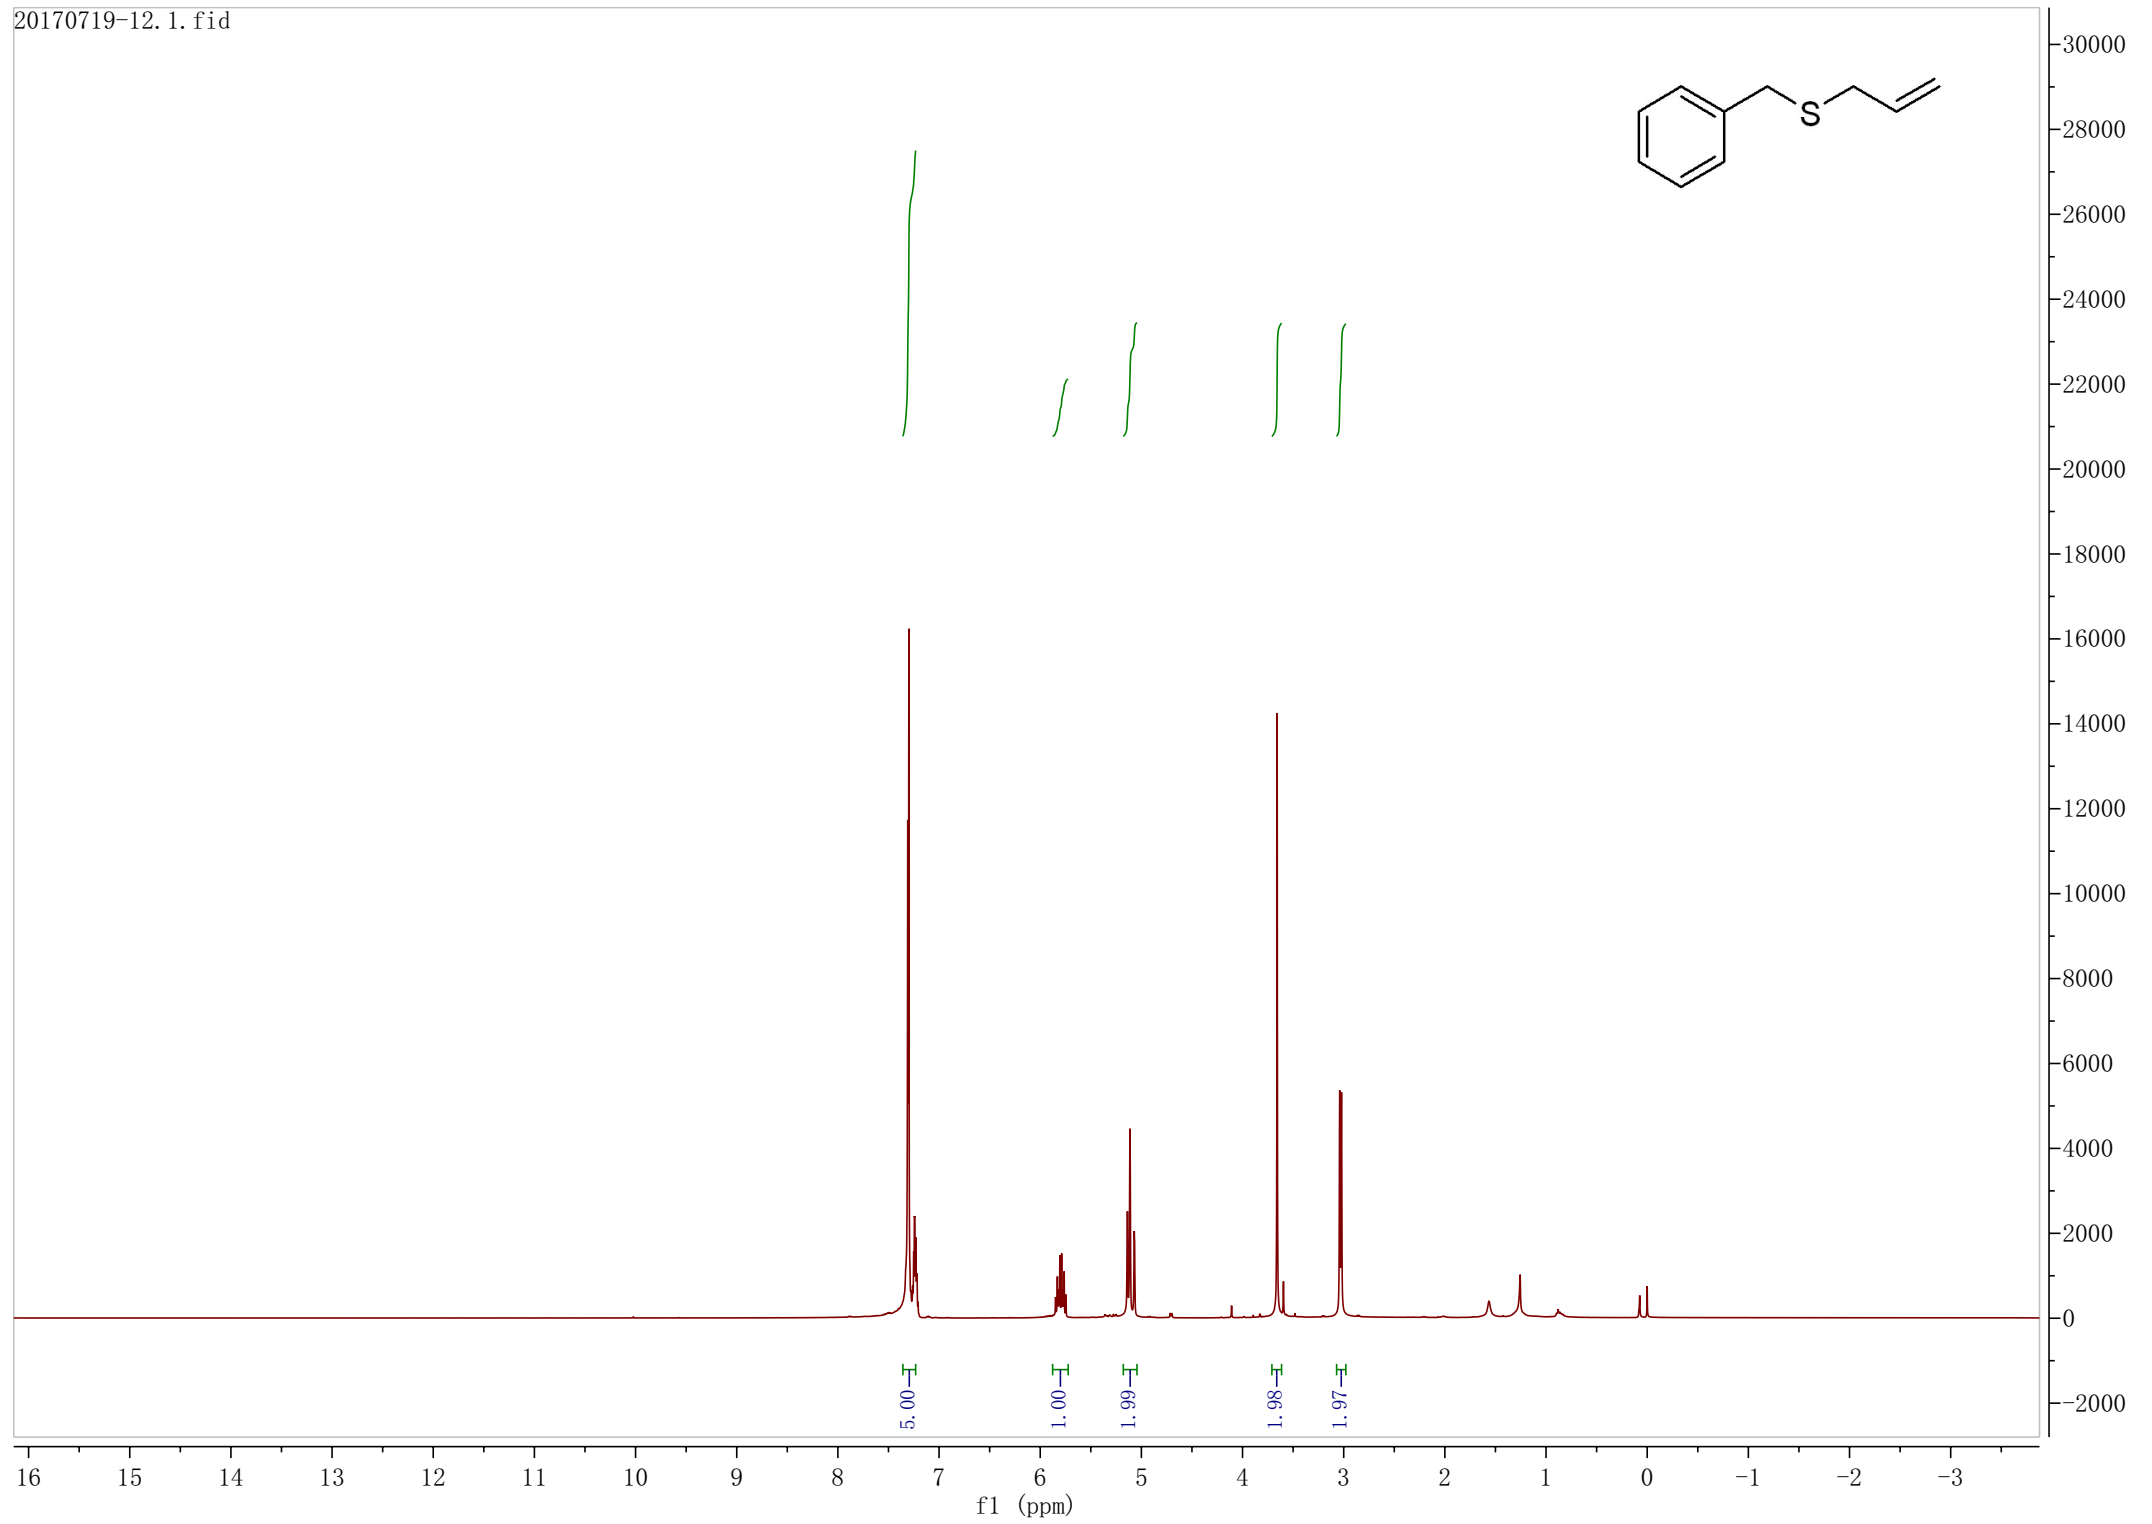

138.32  
134.21  
129.02  
128.47  
126.93

117.30

34.94  
34.09

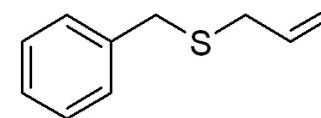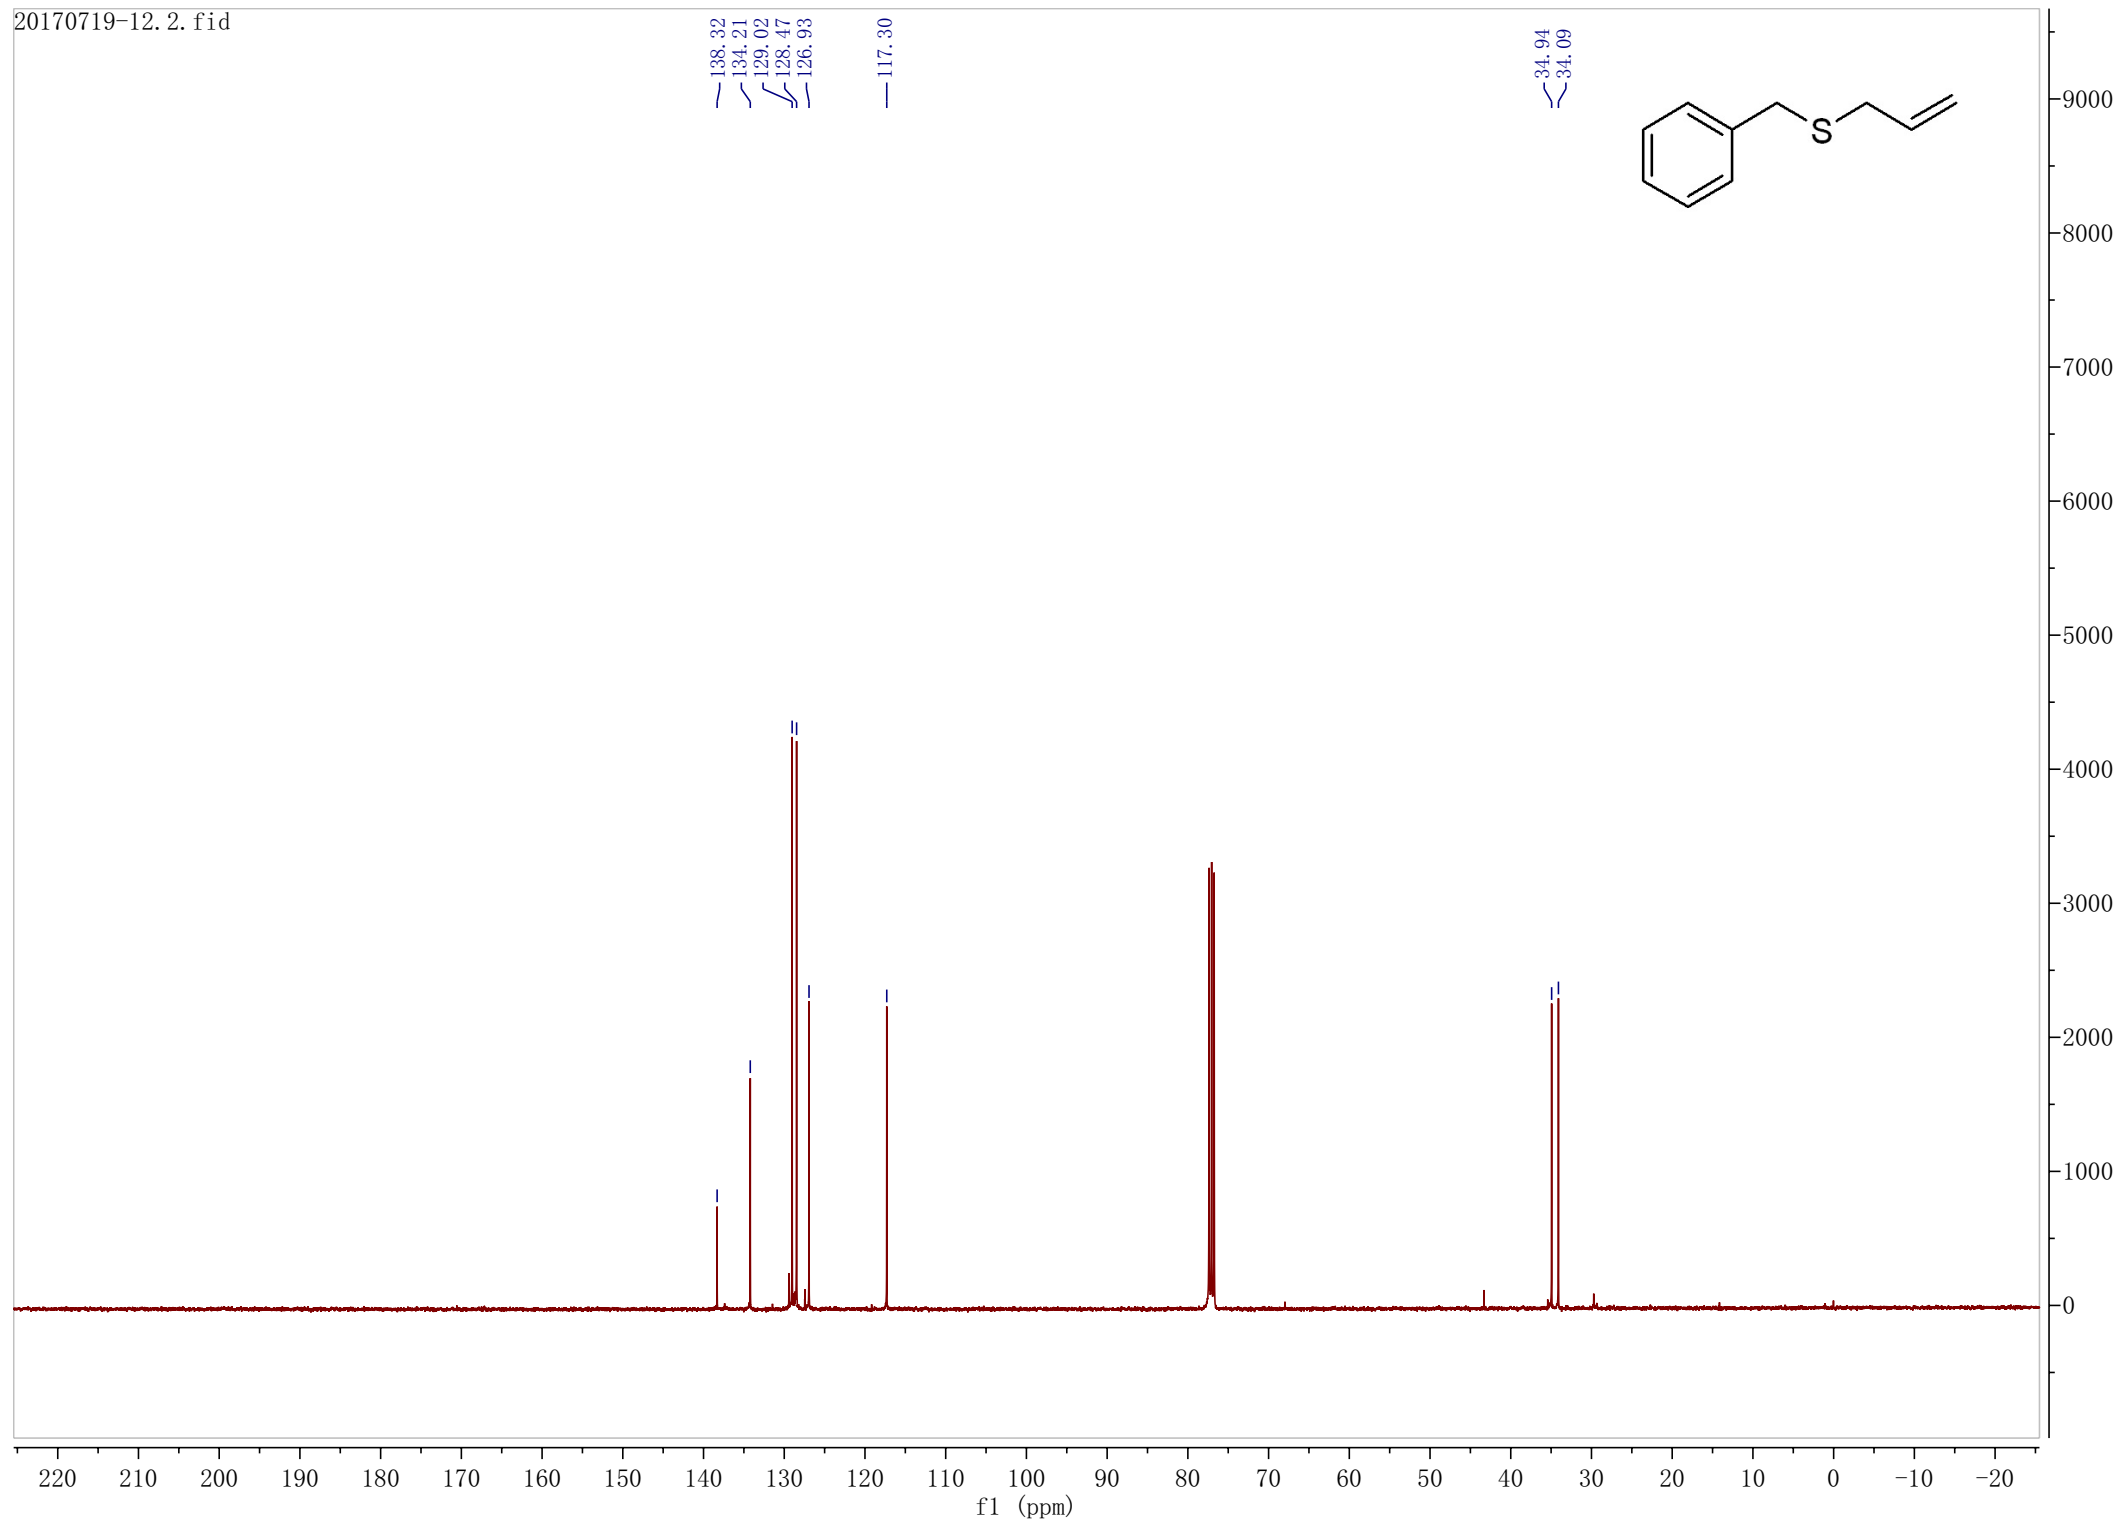

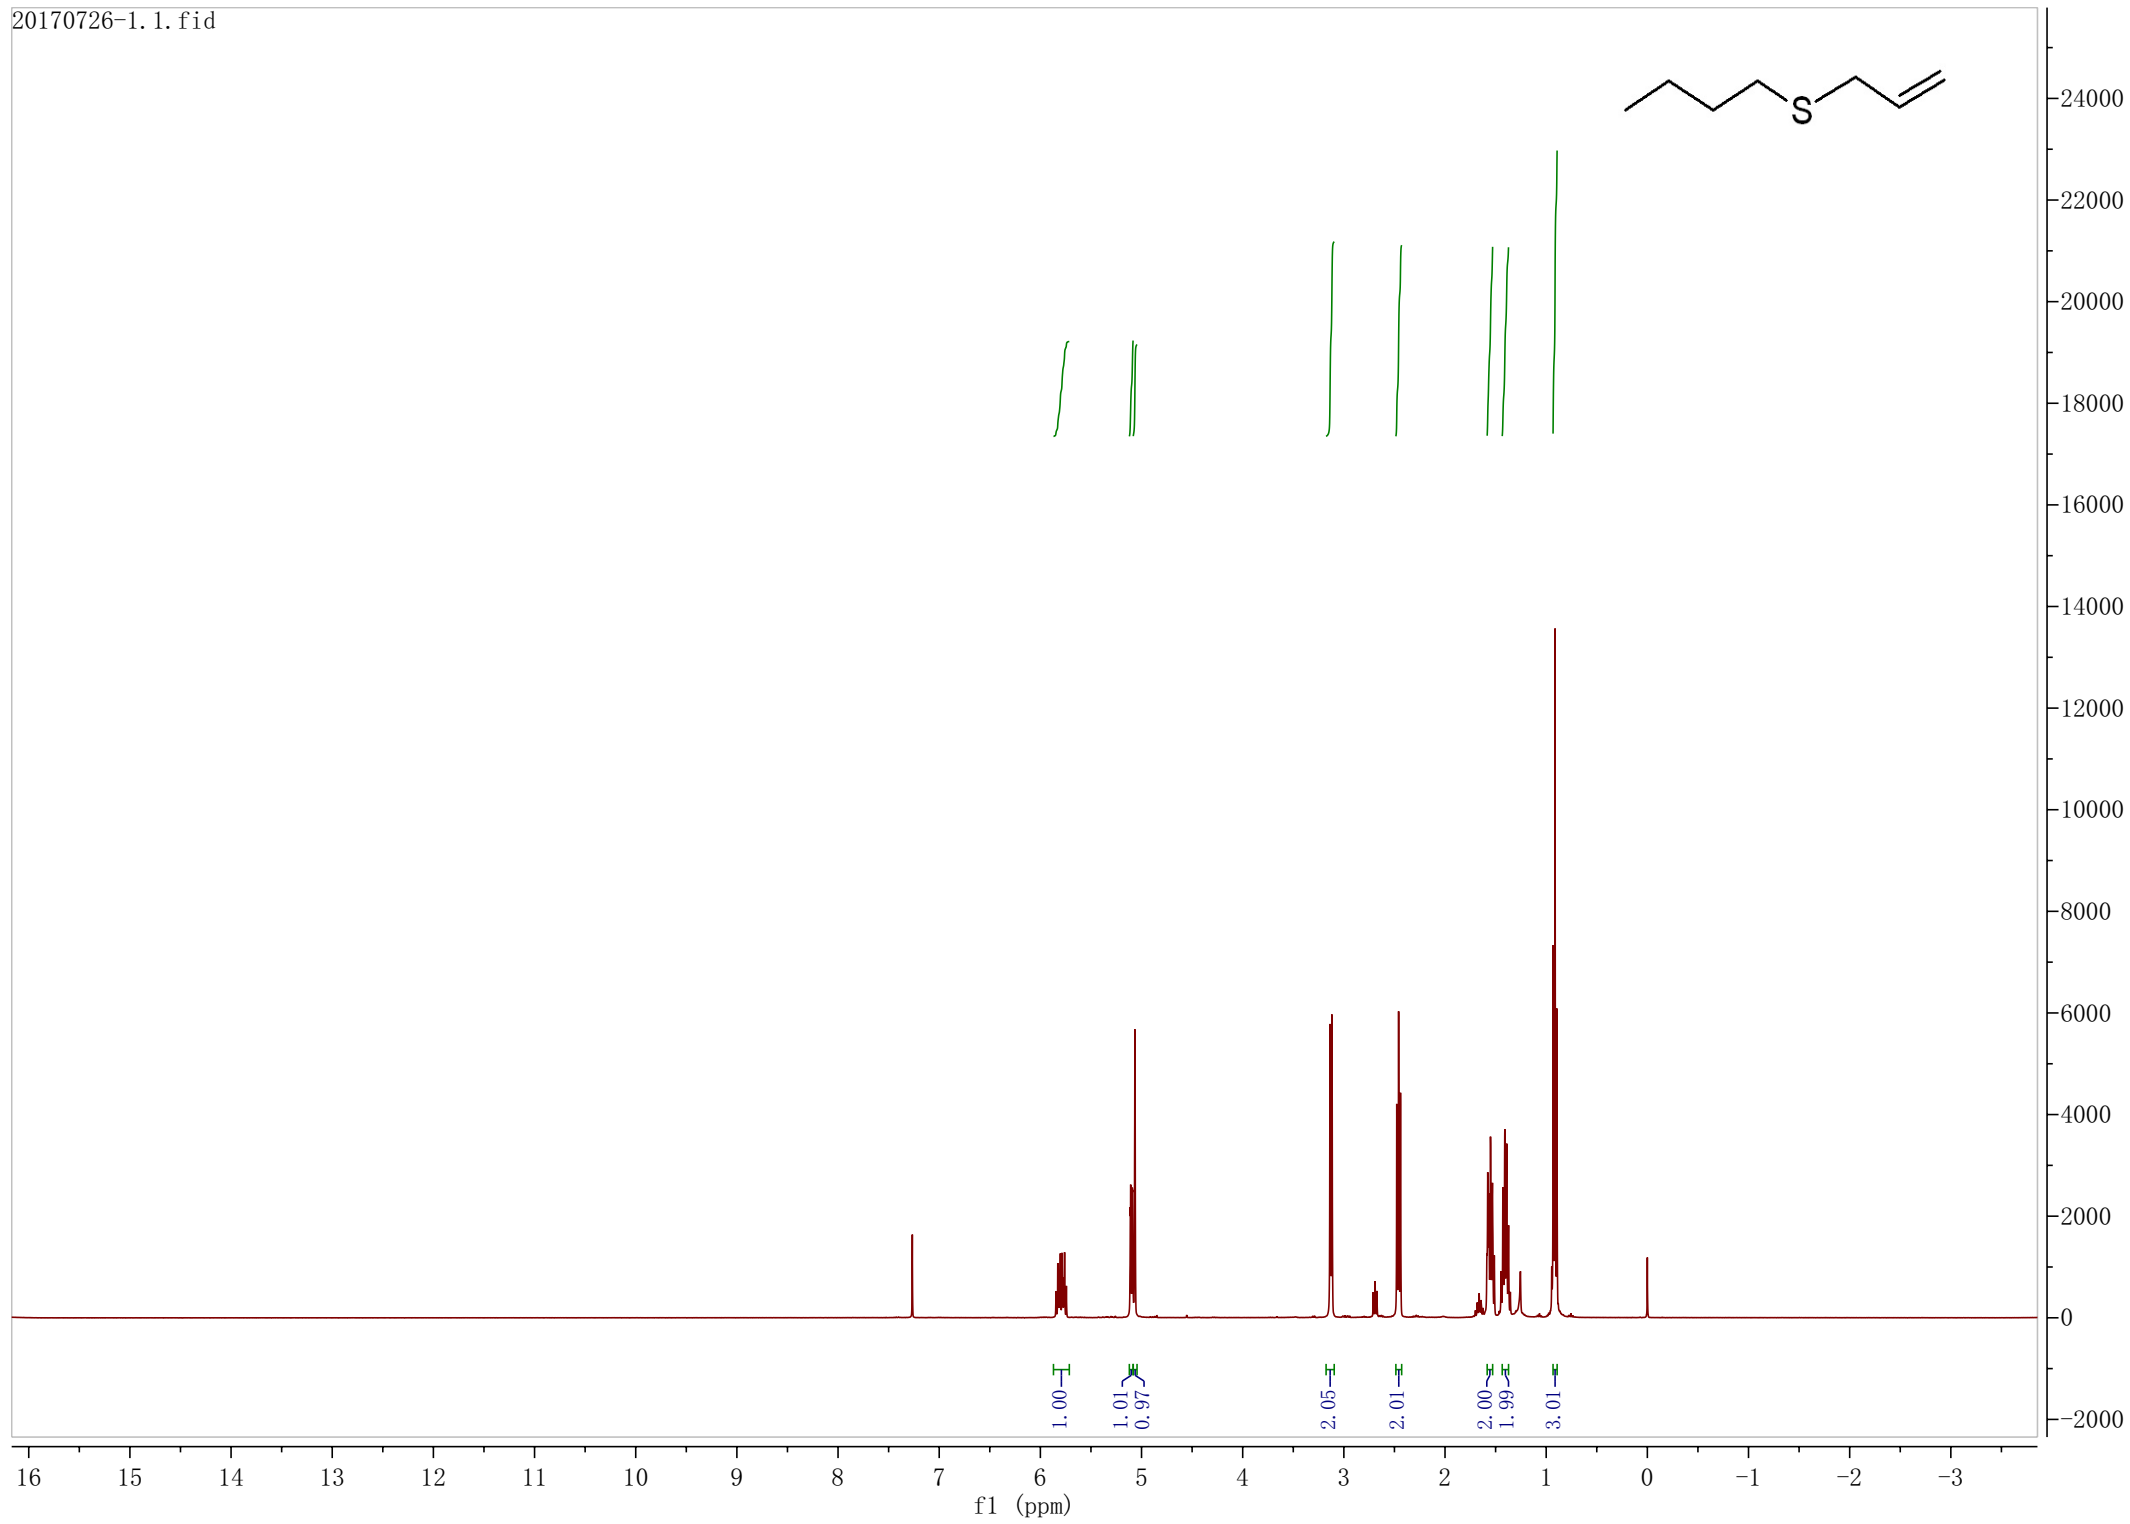



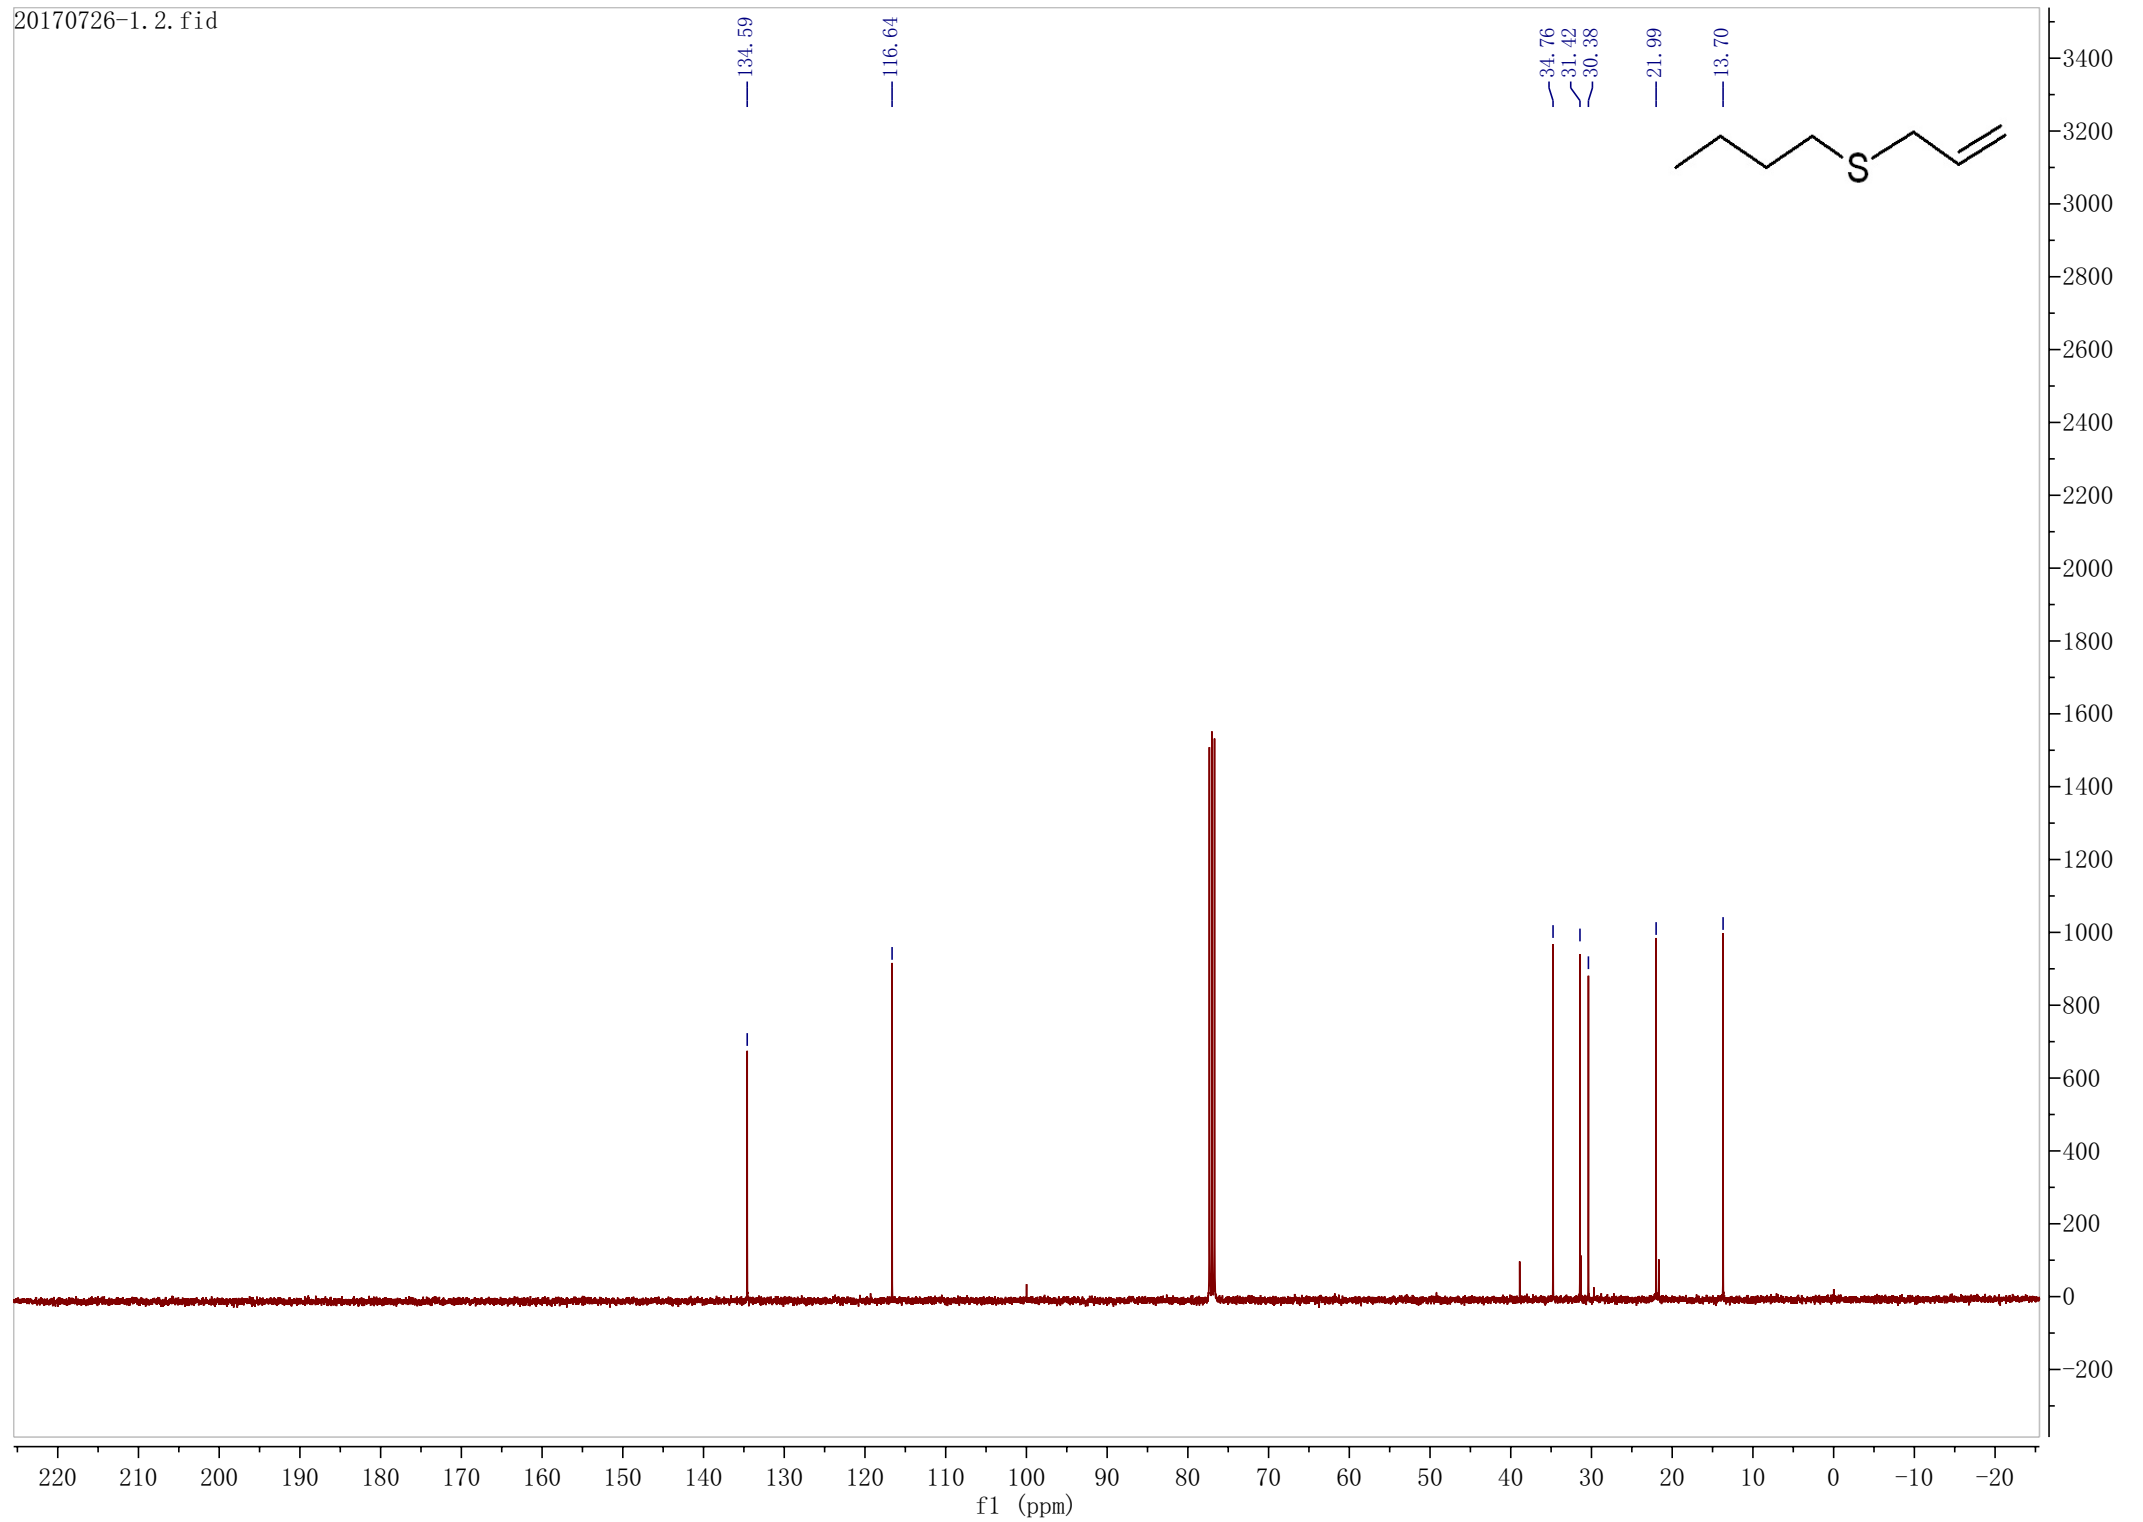

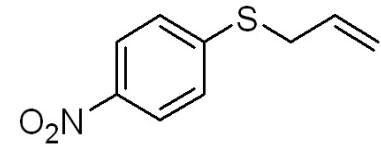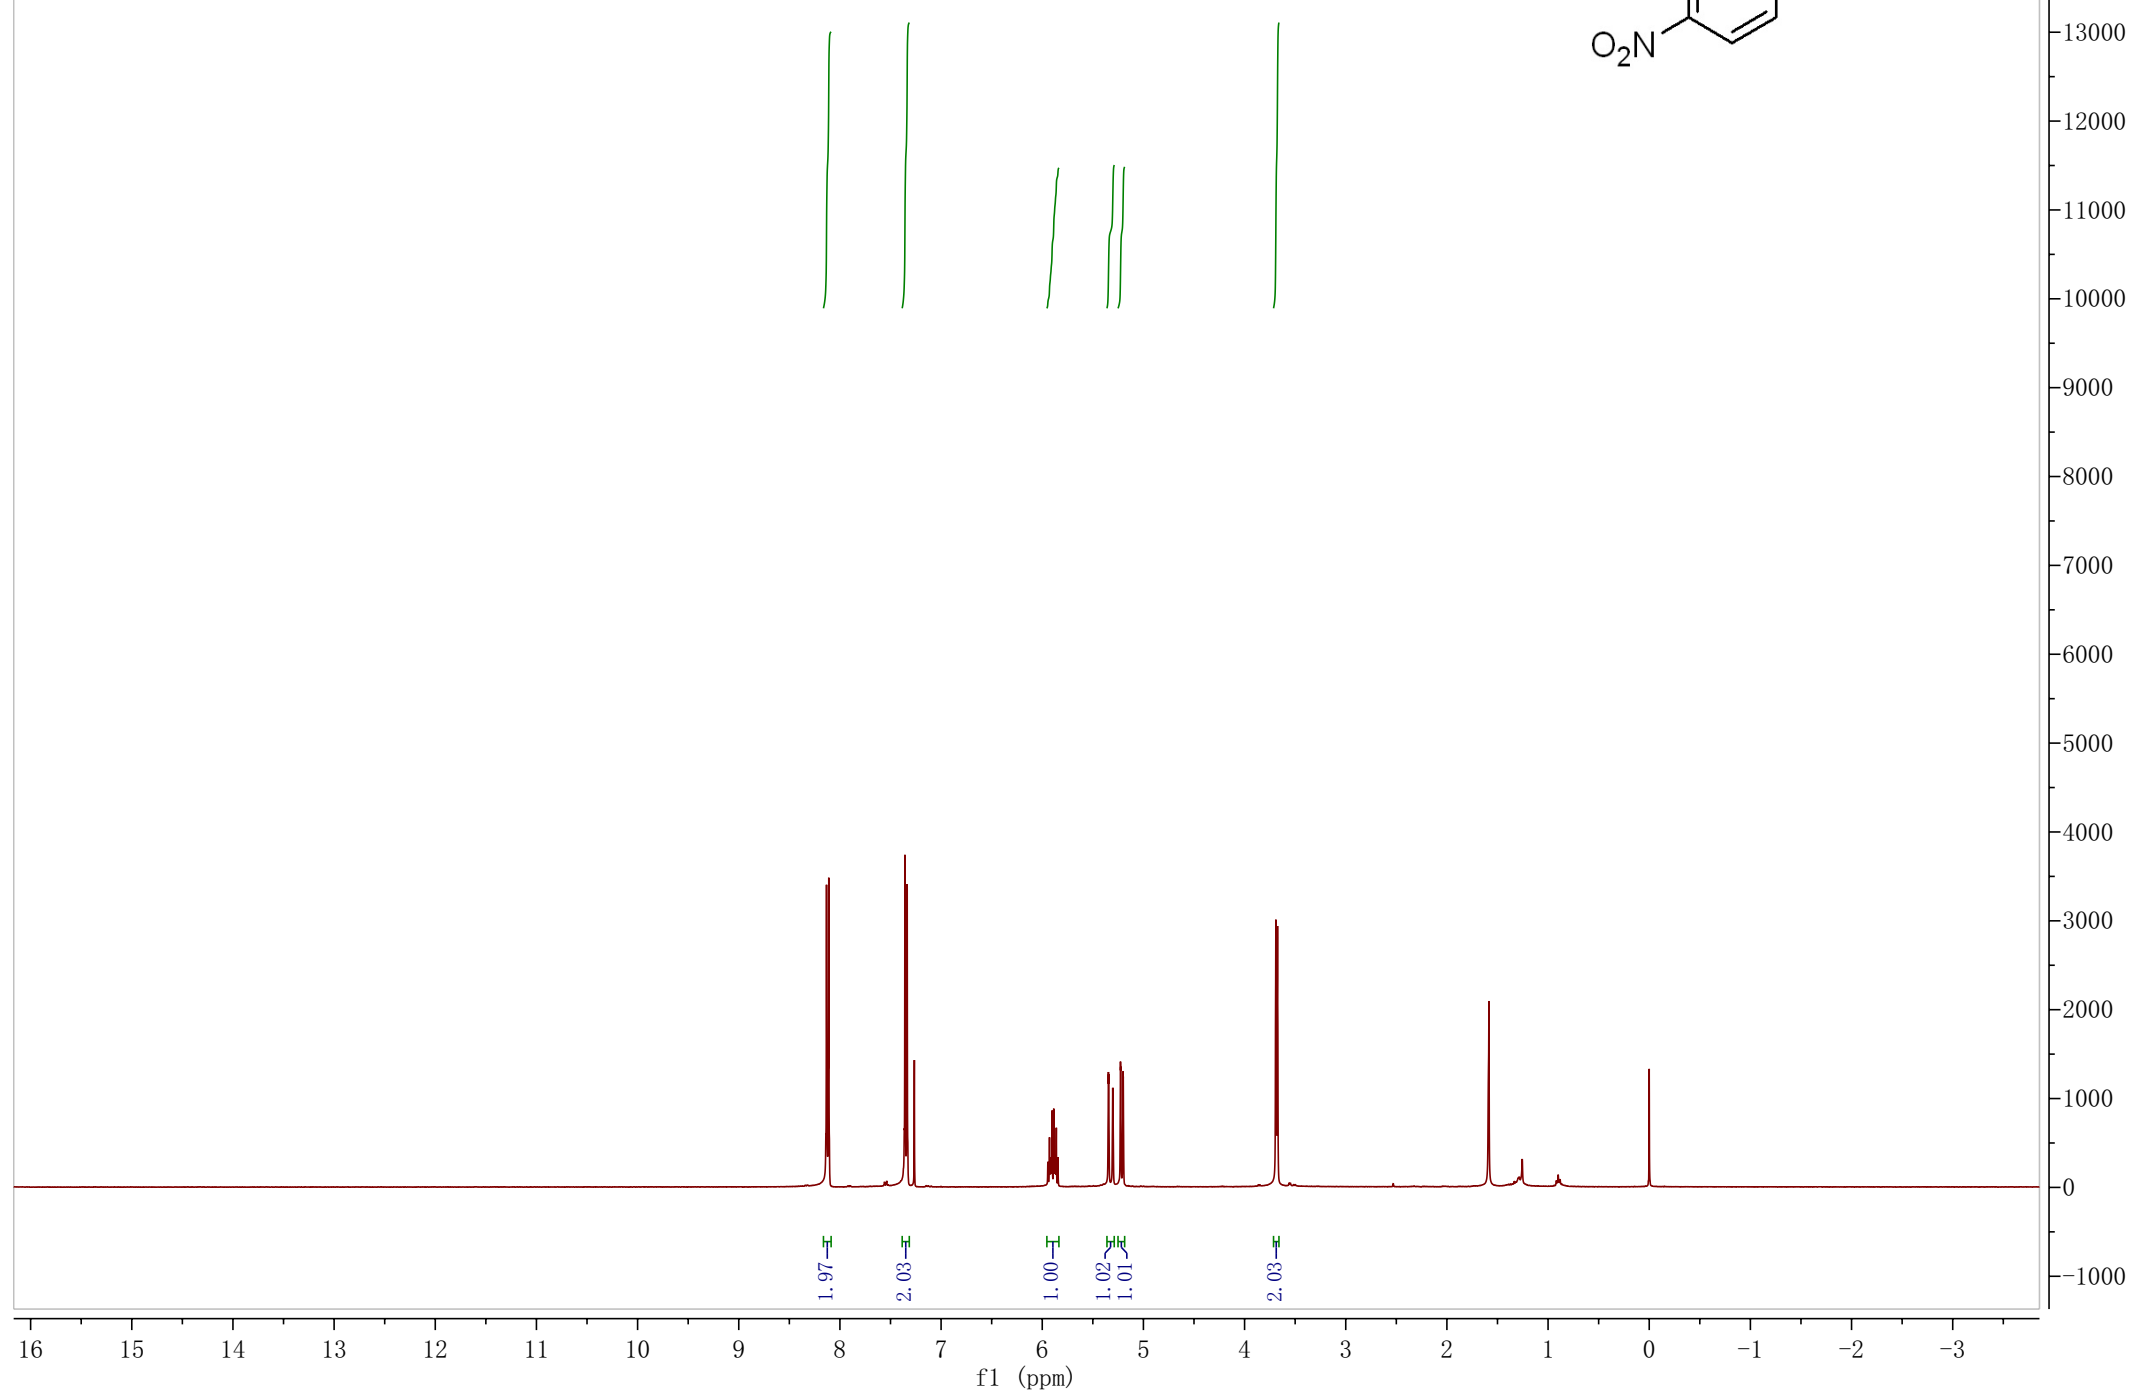

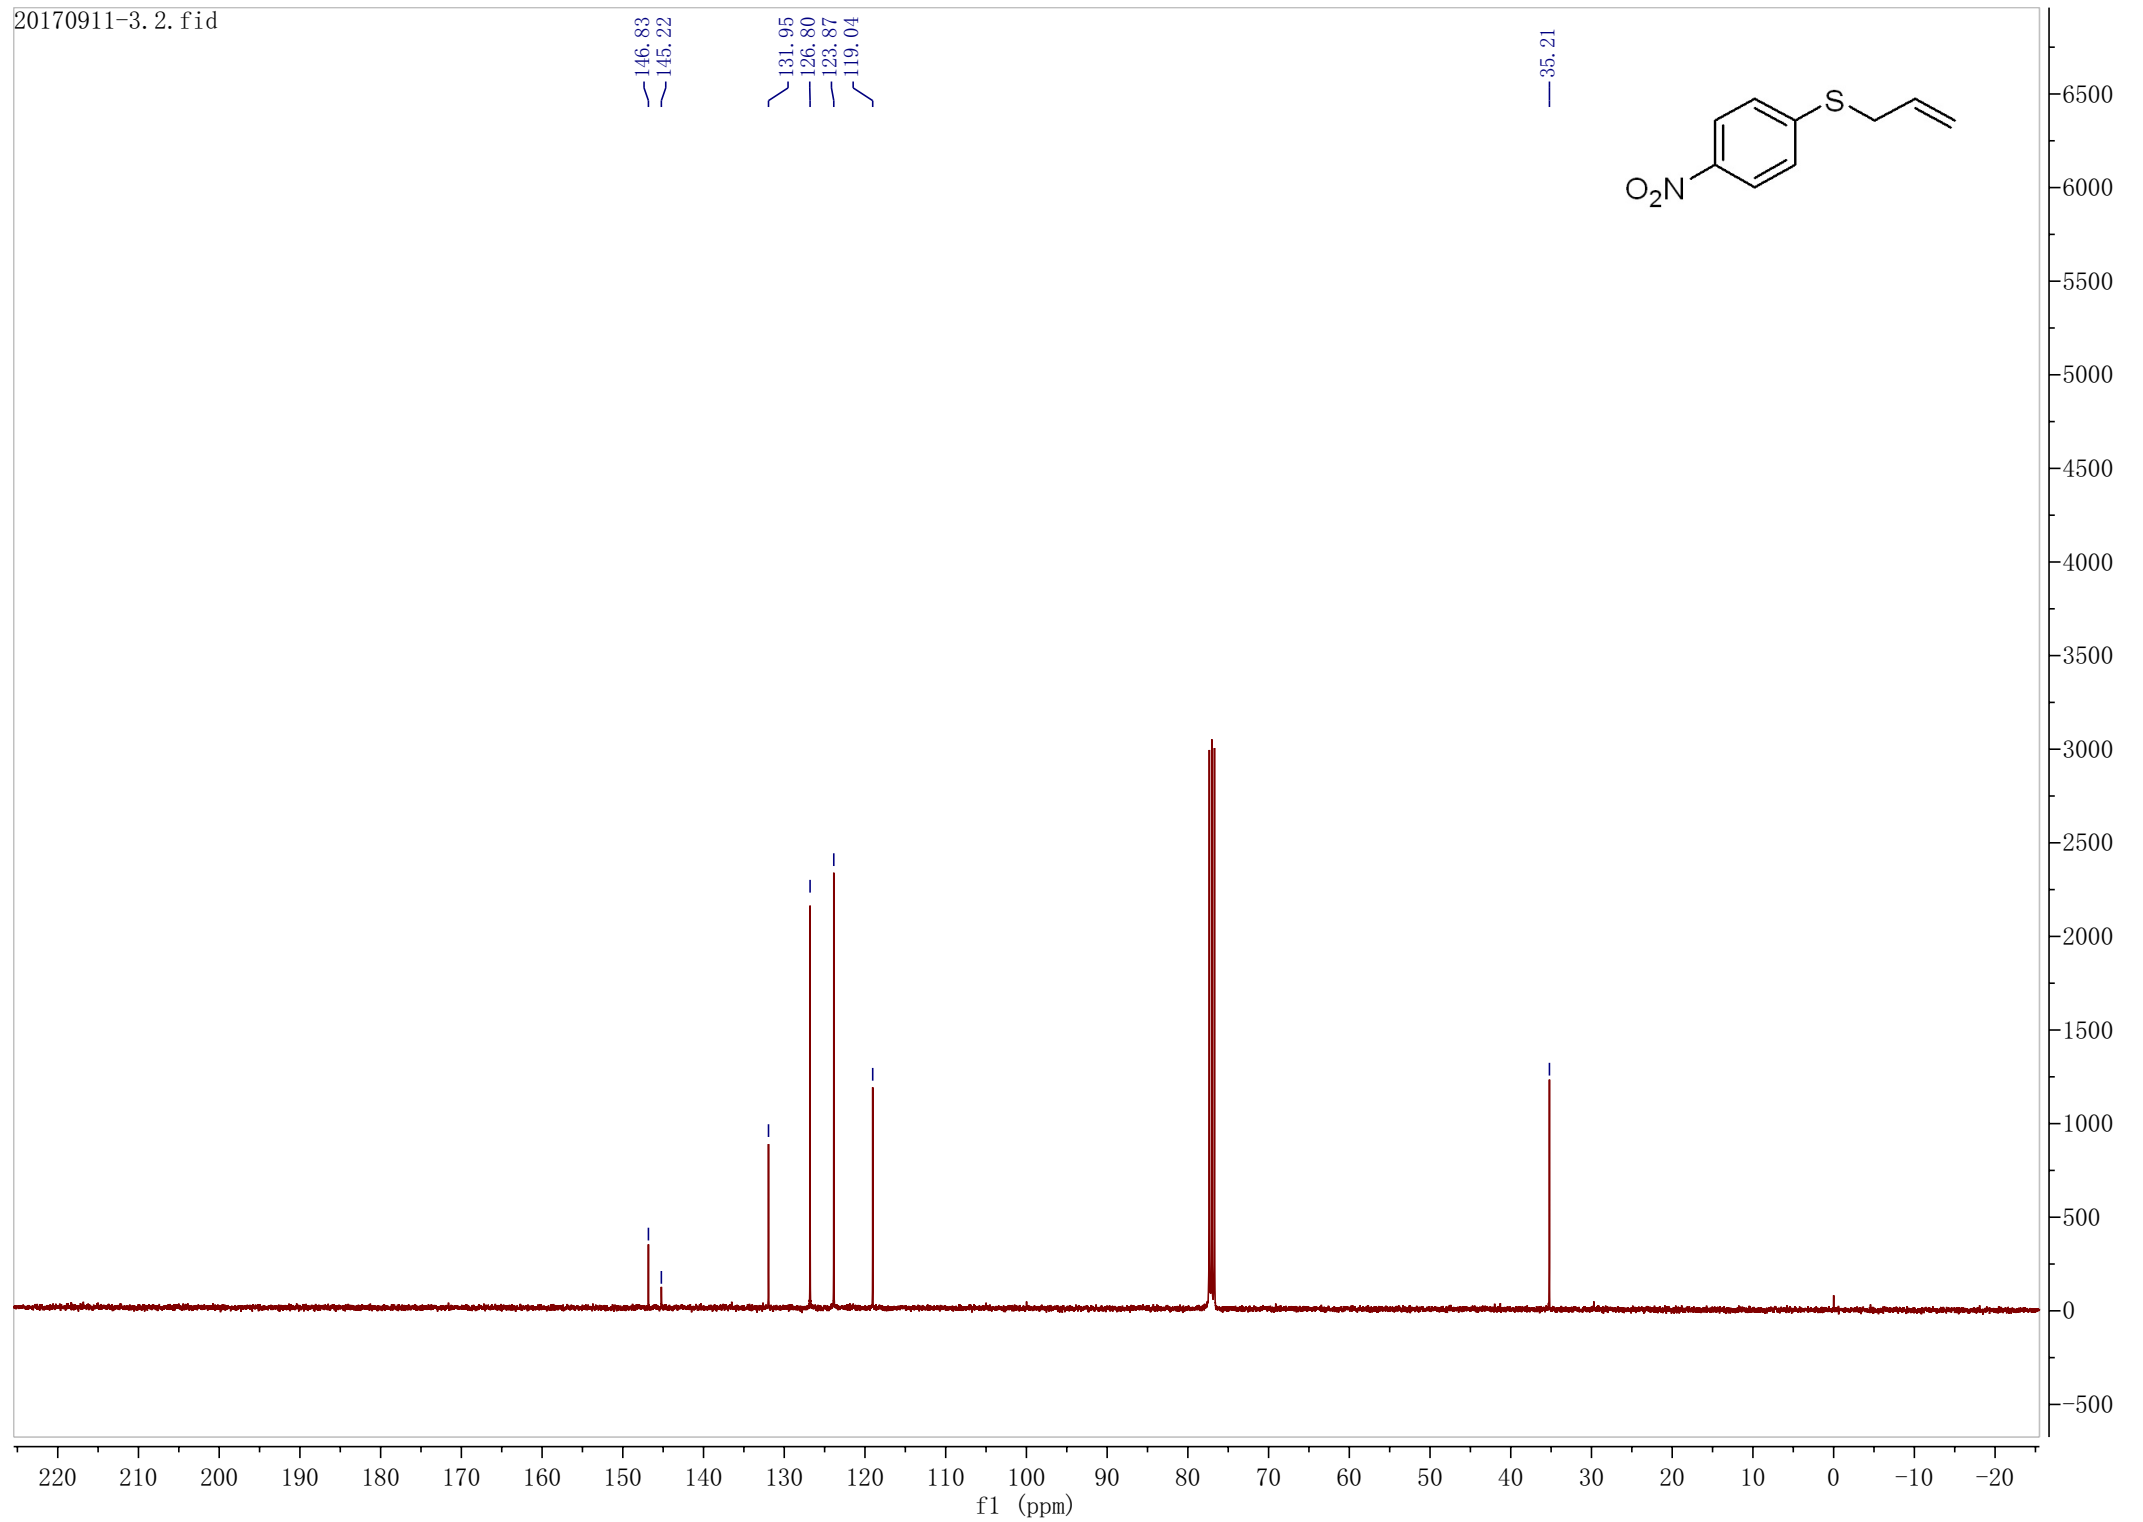

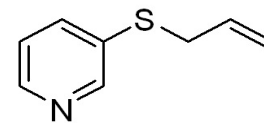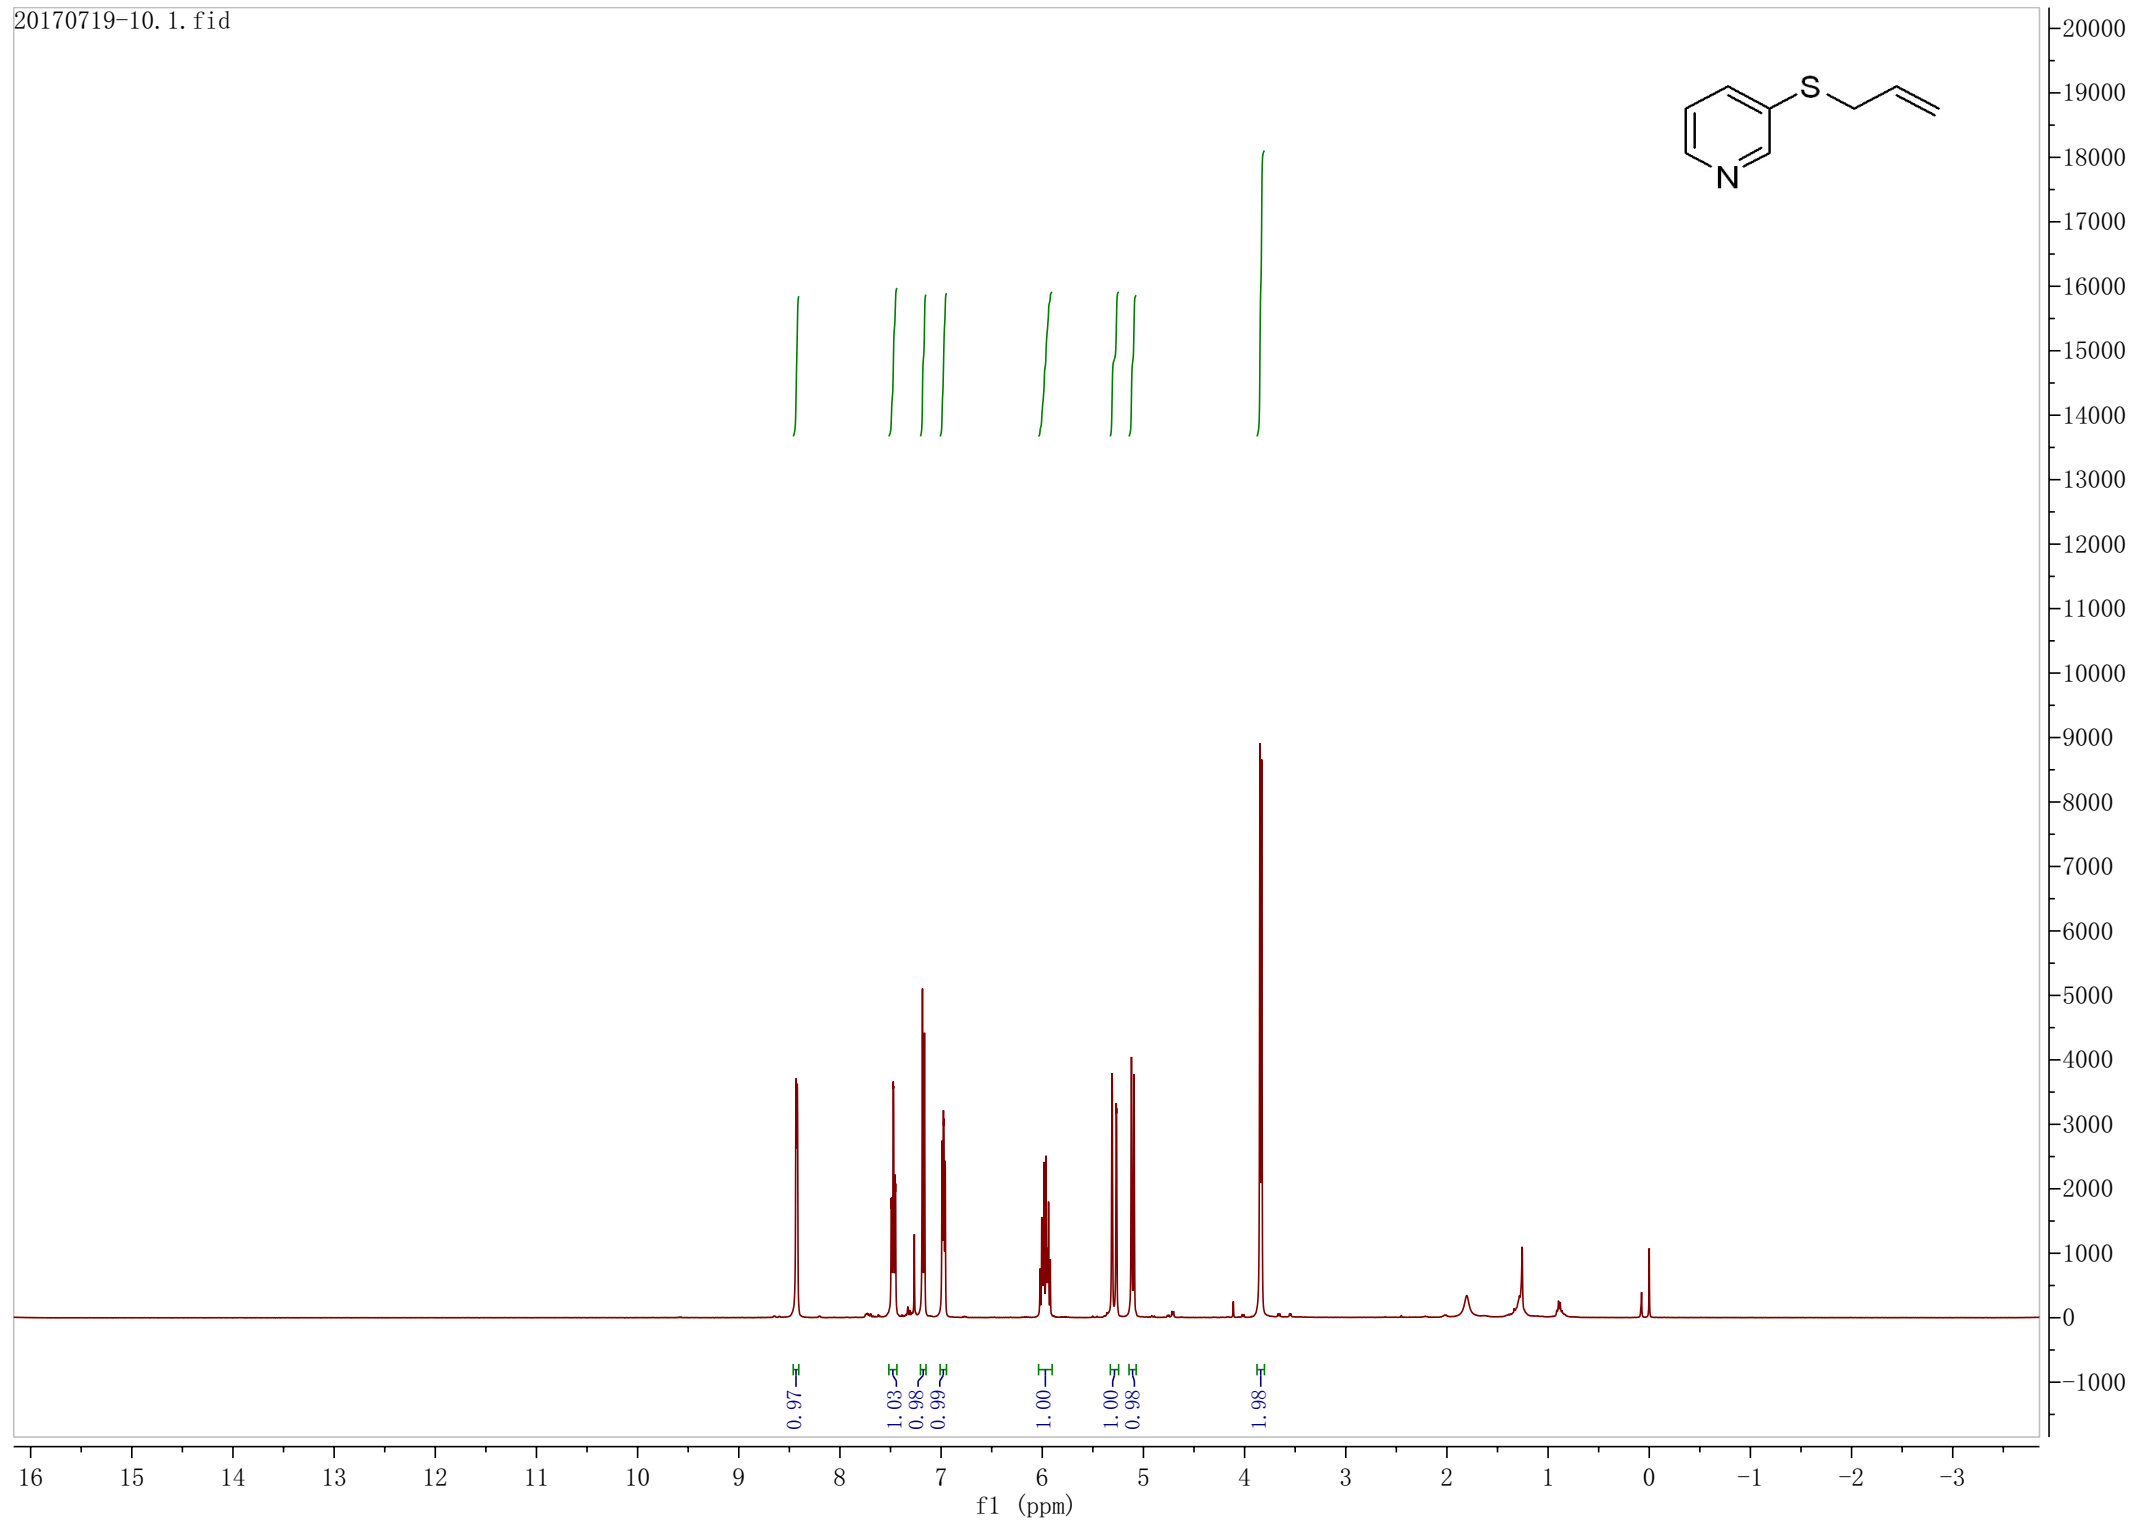

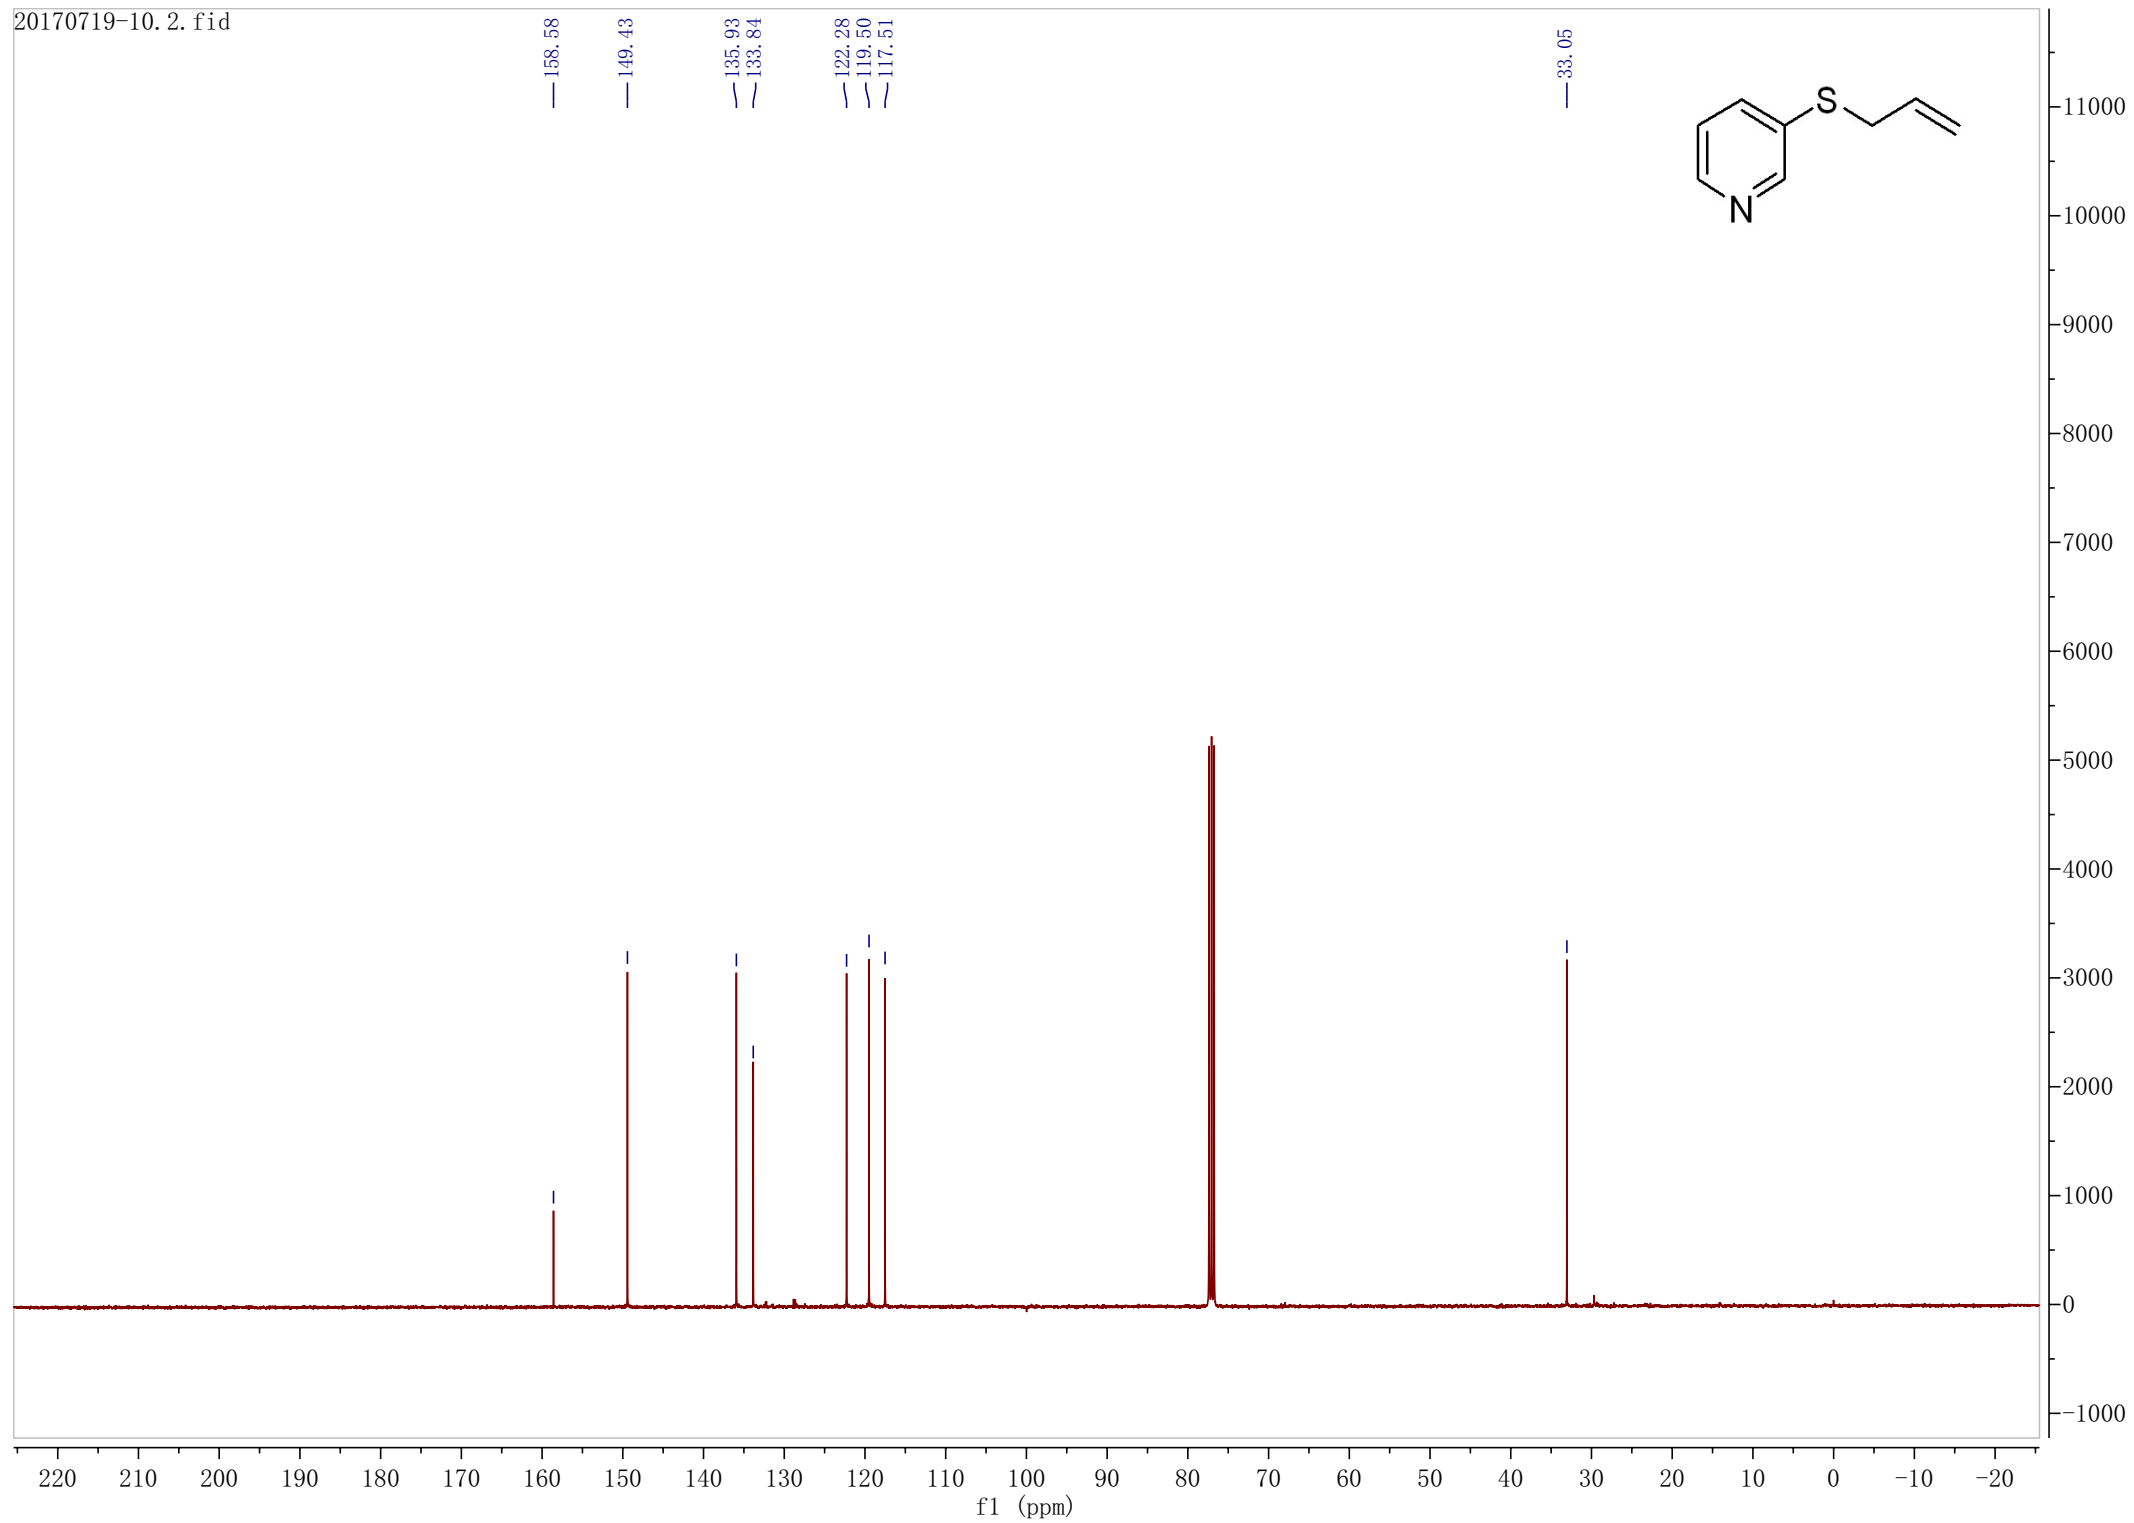

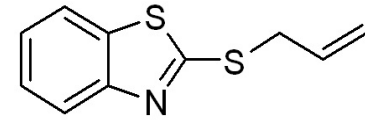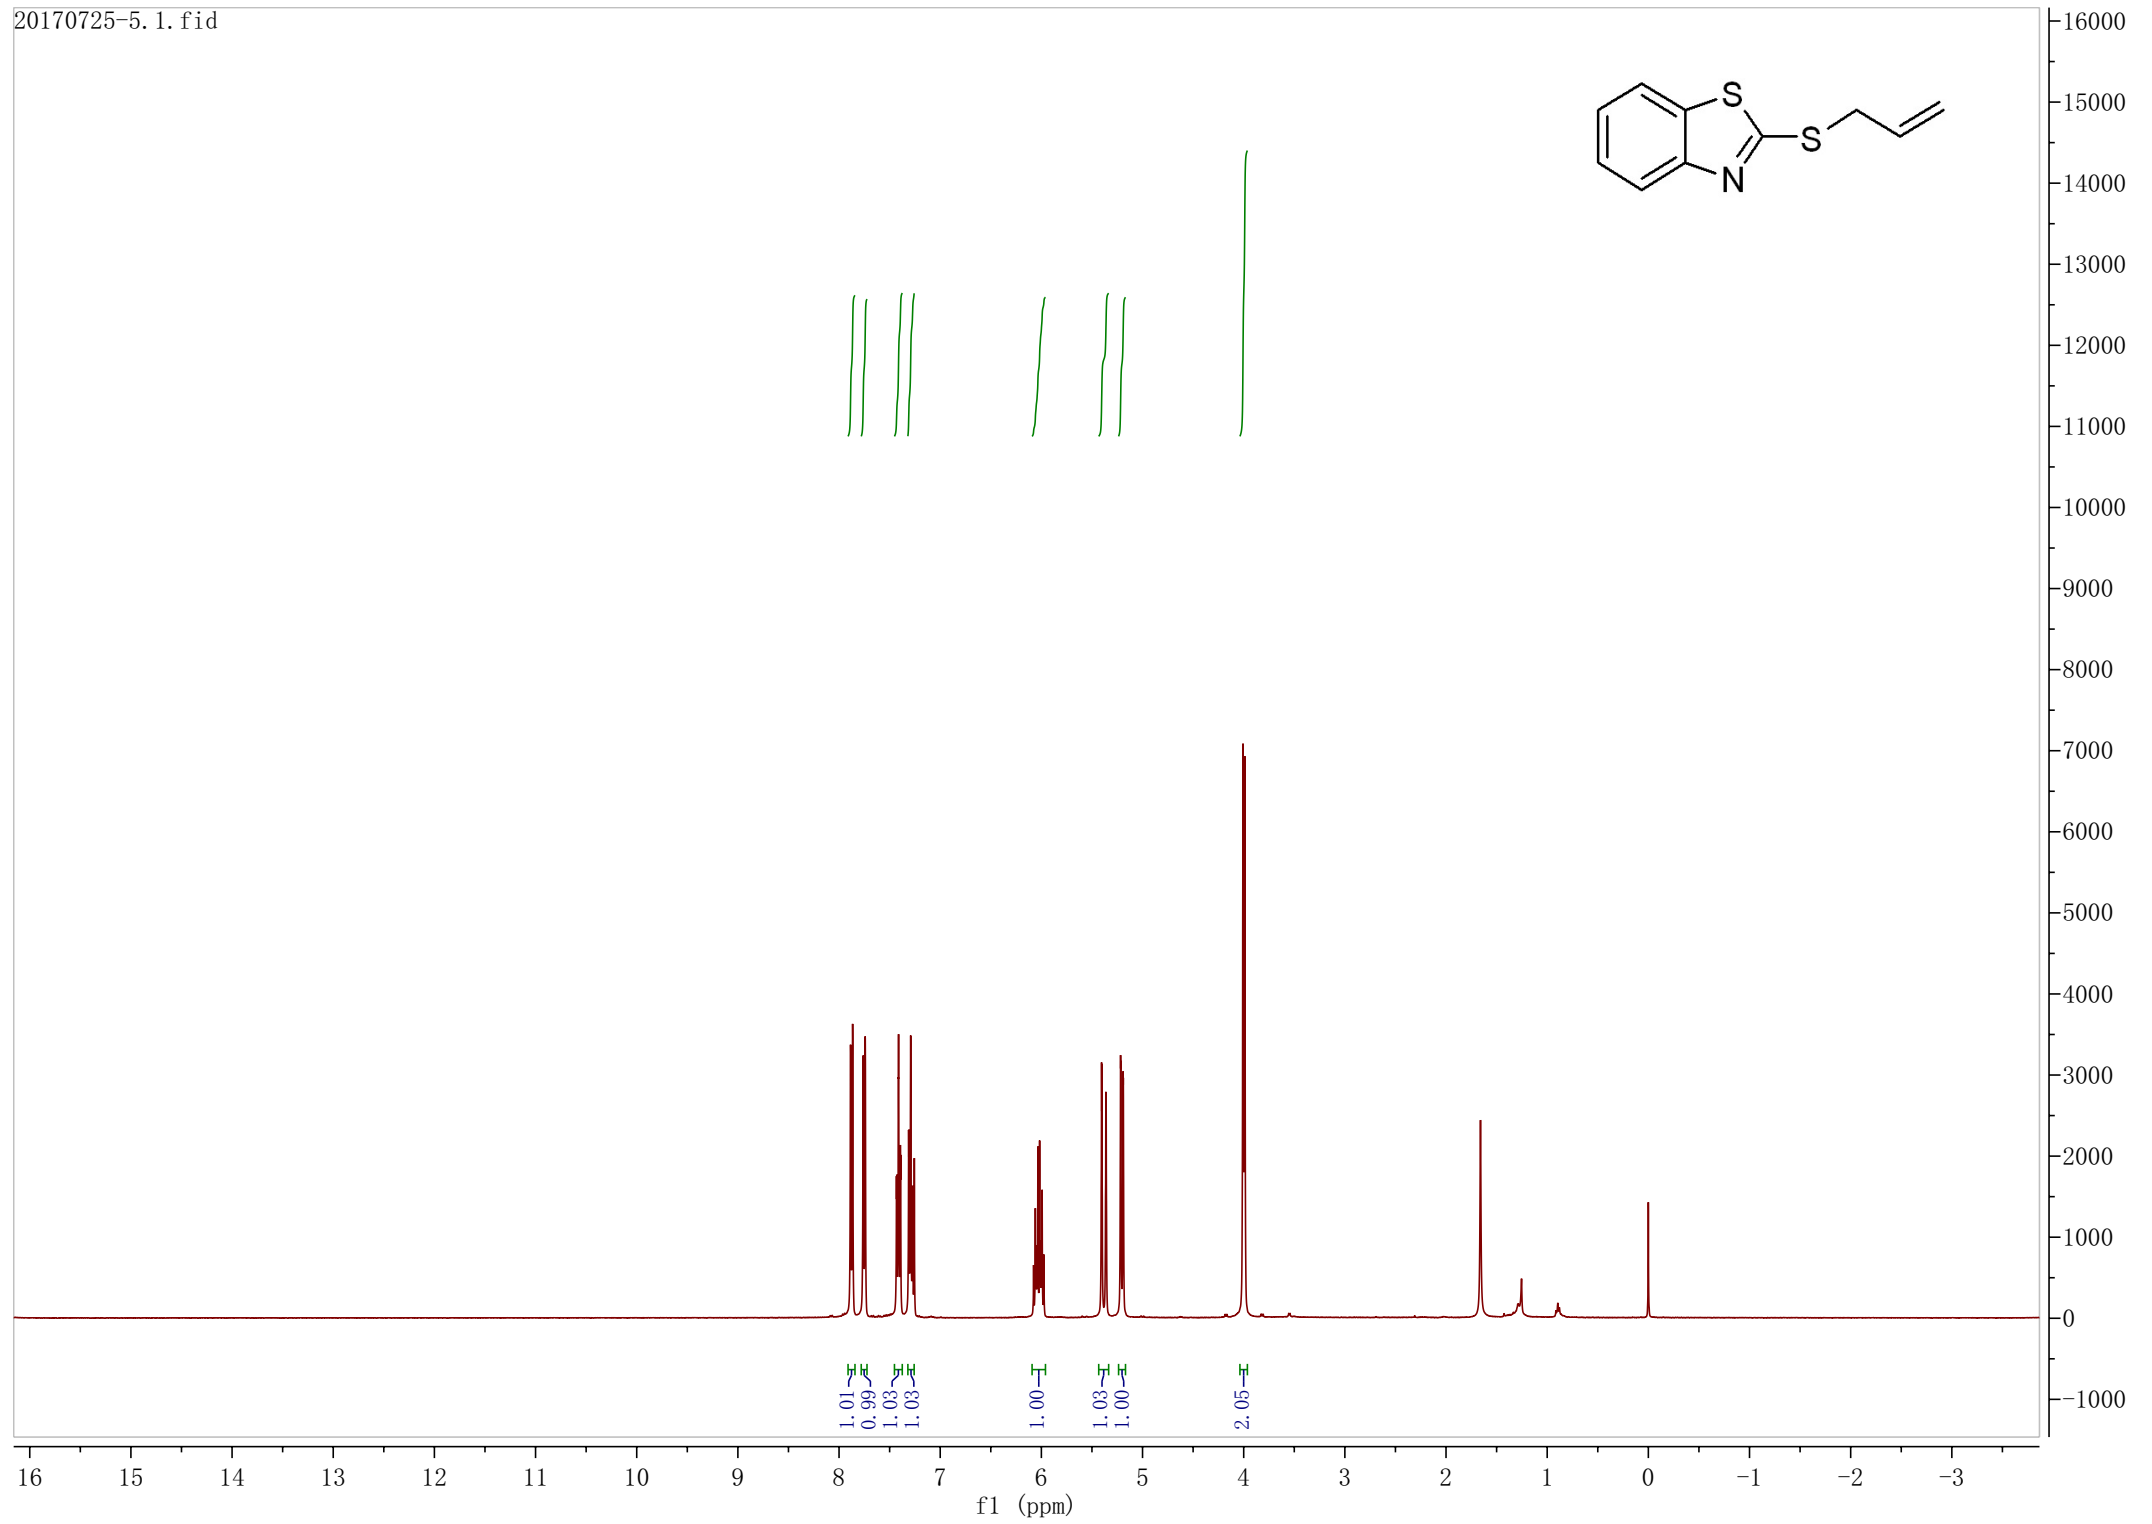

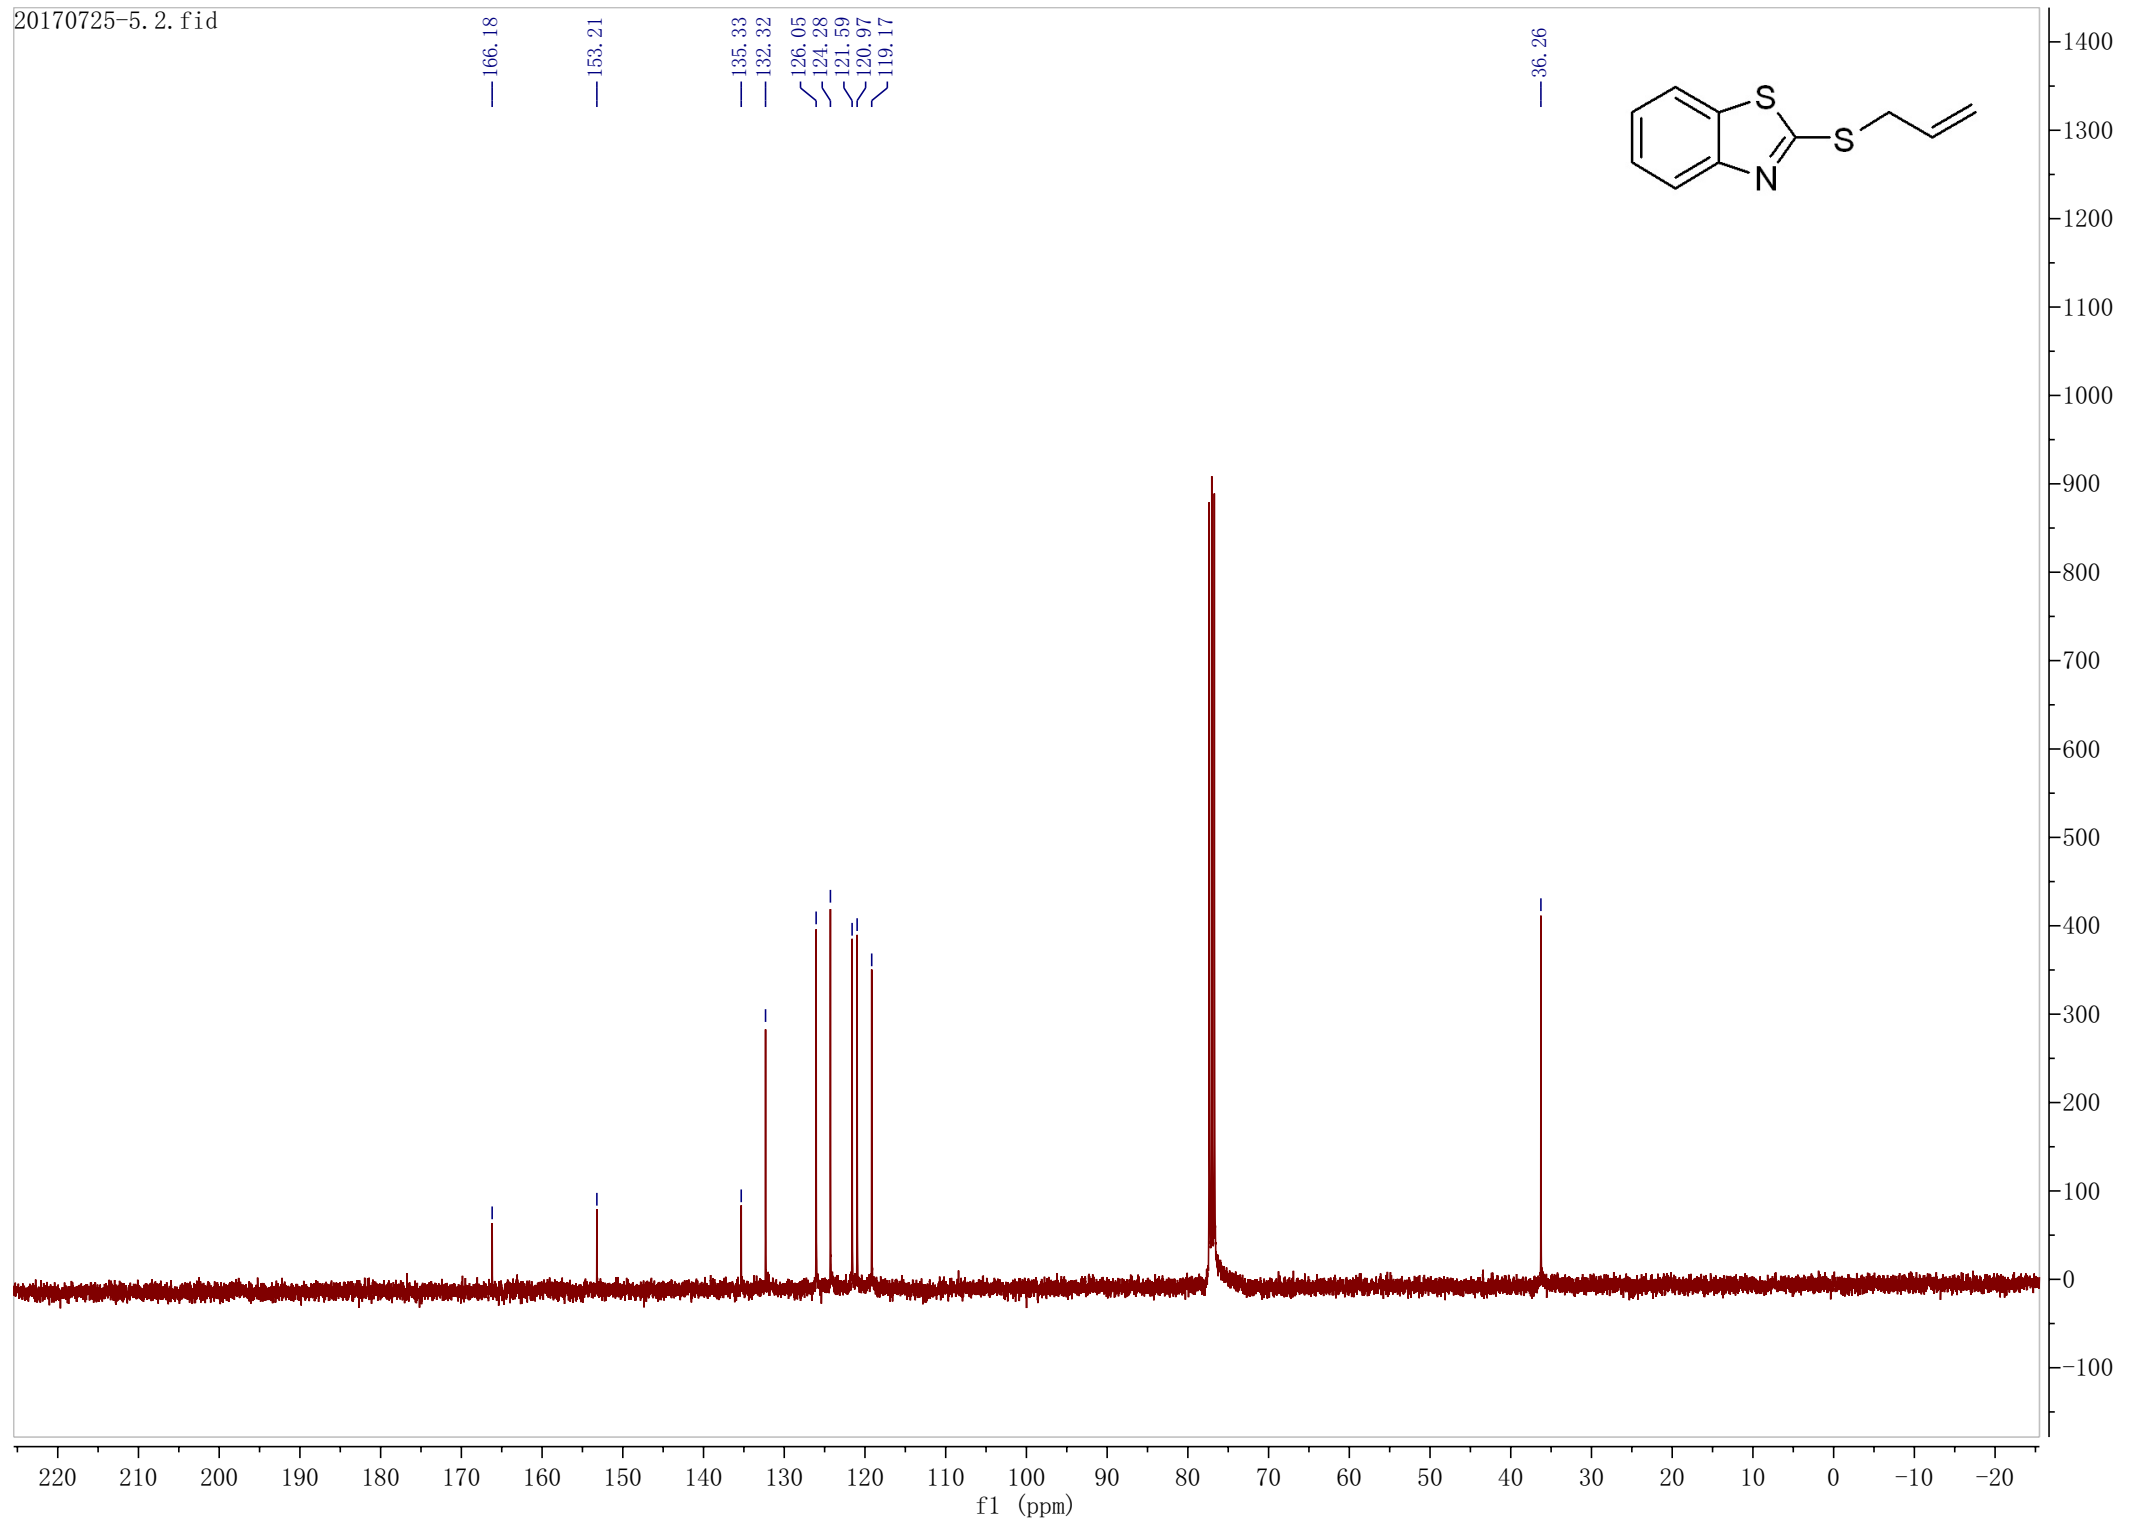

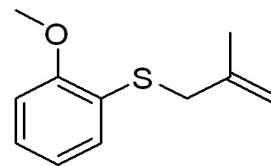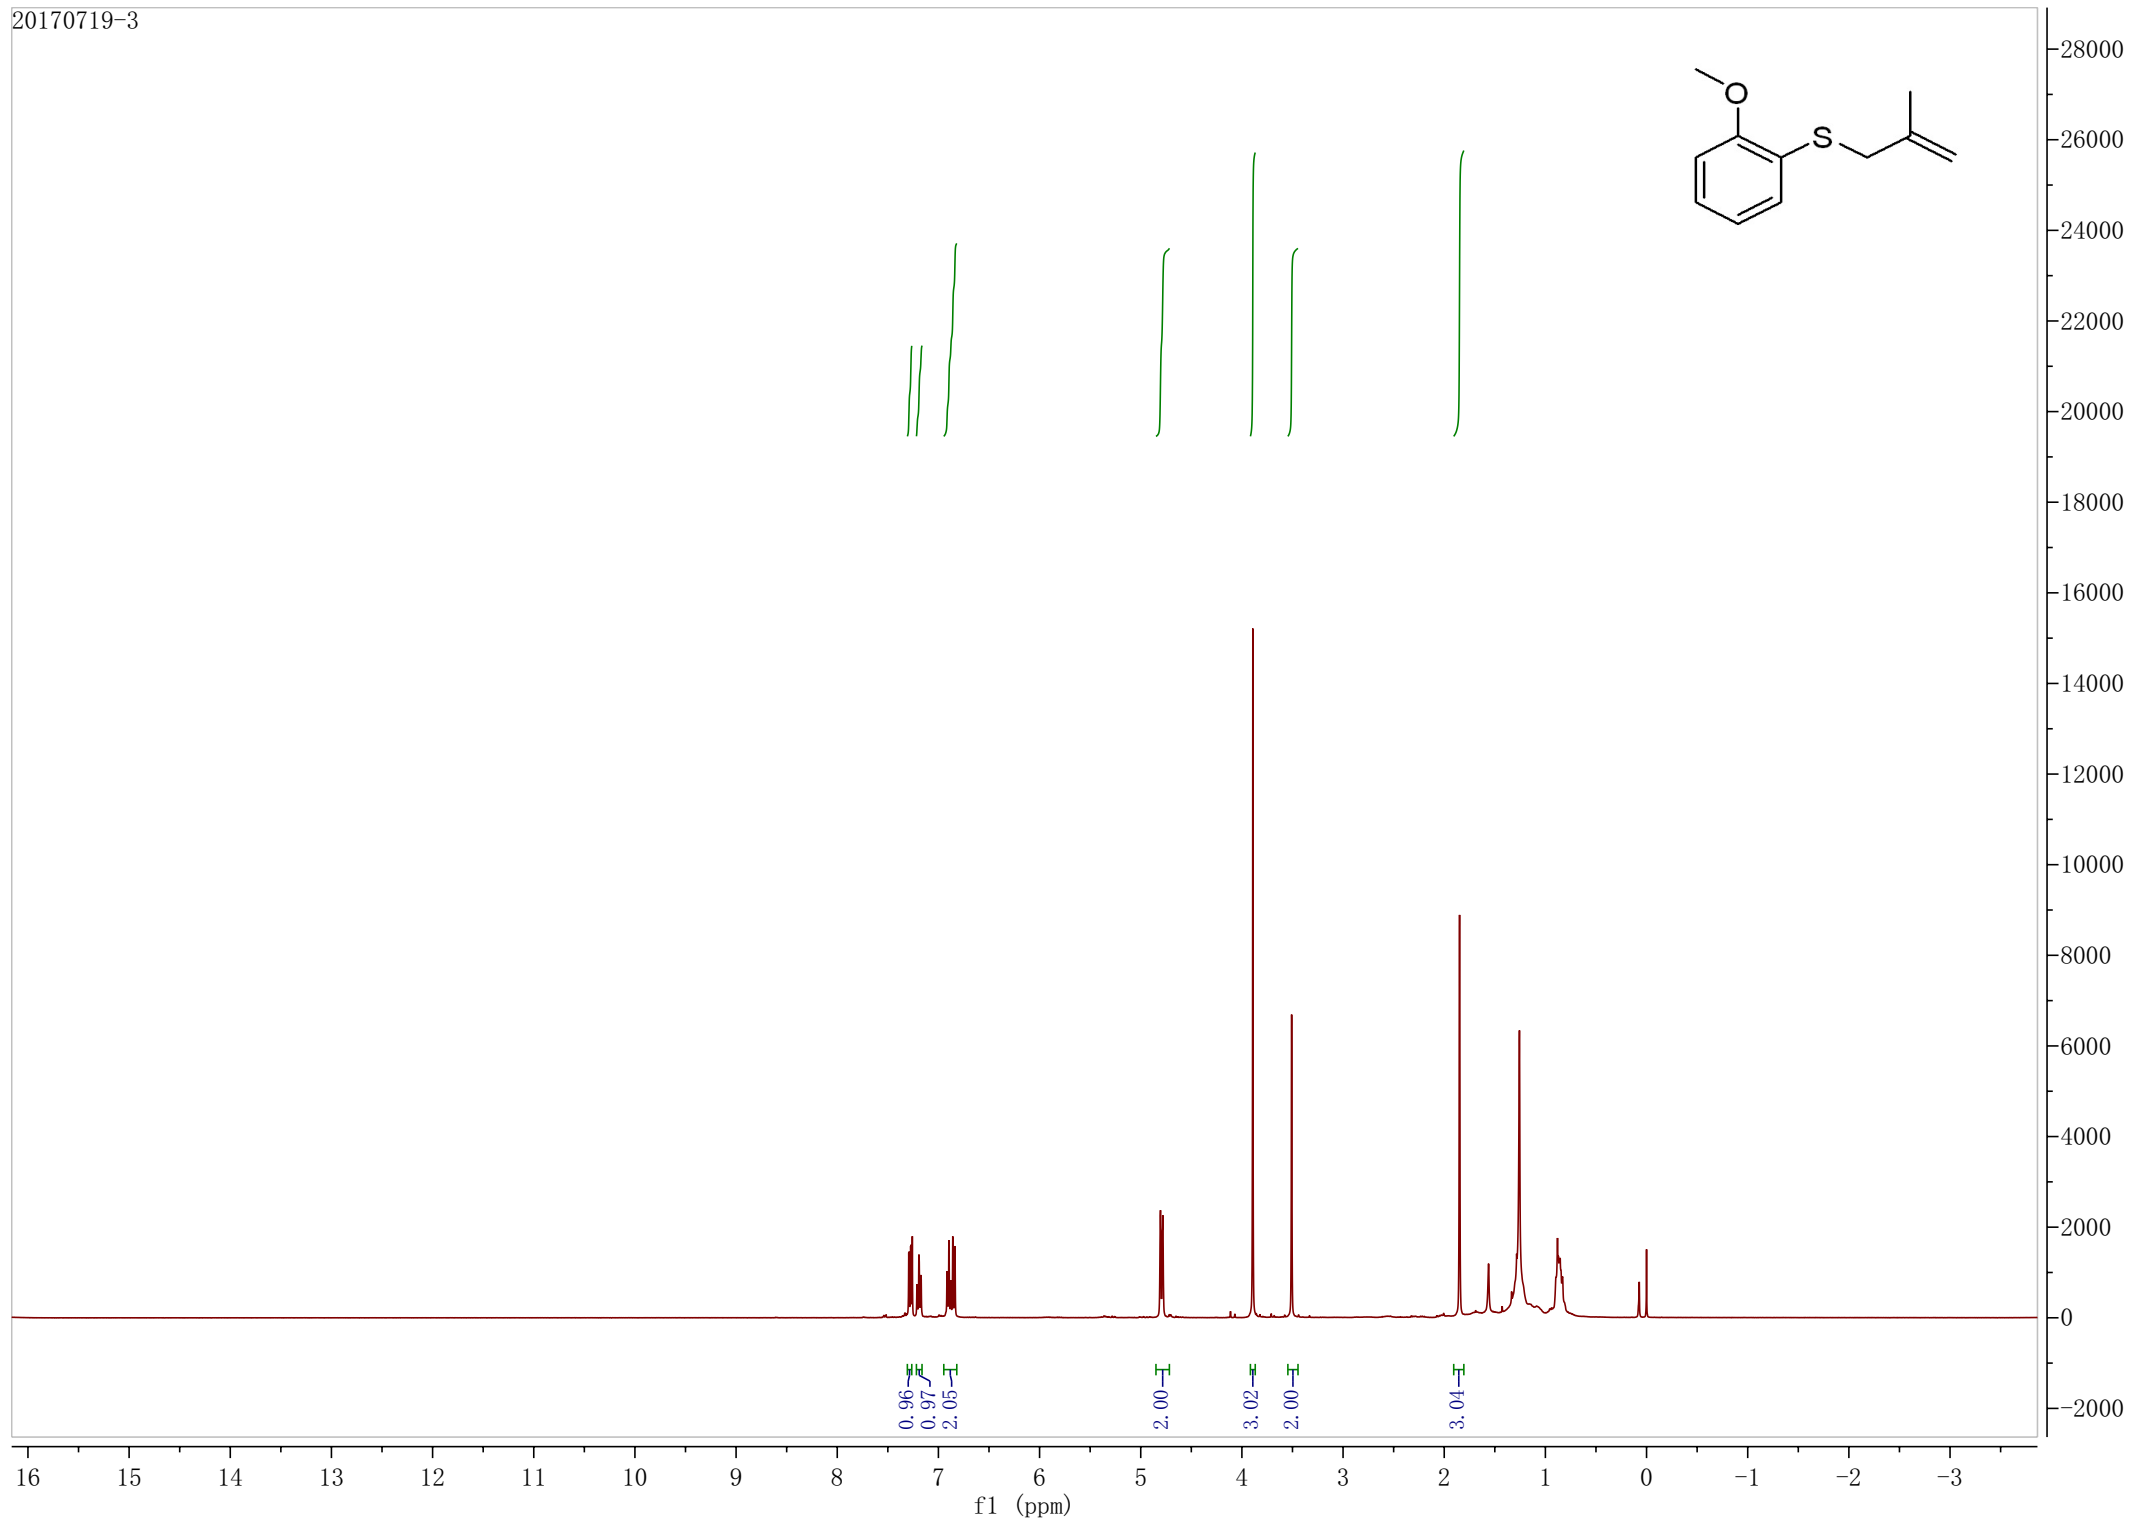



20170719-3

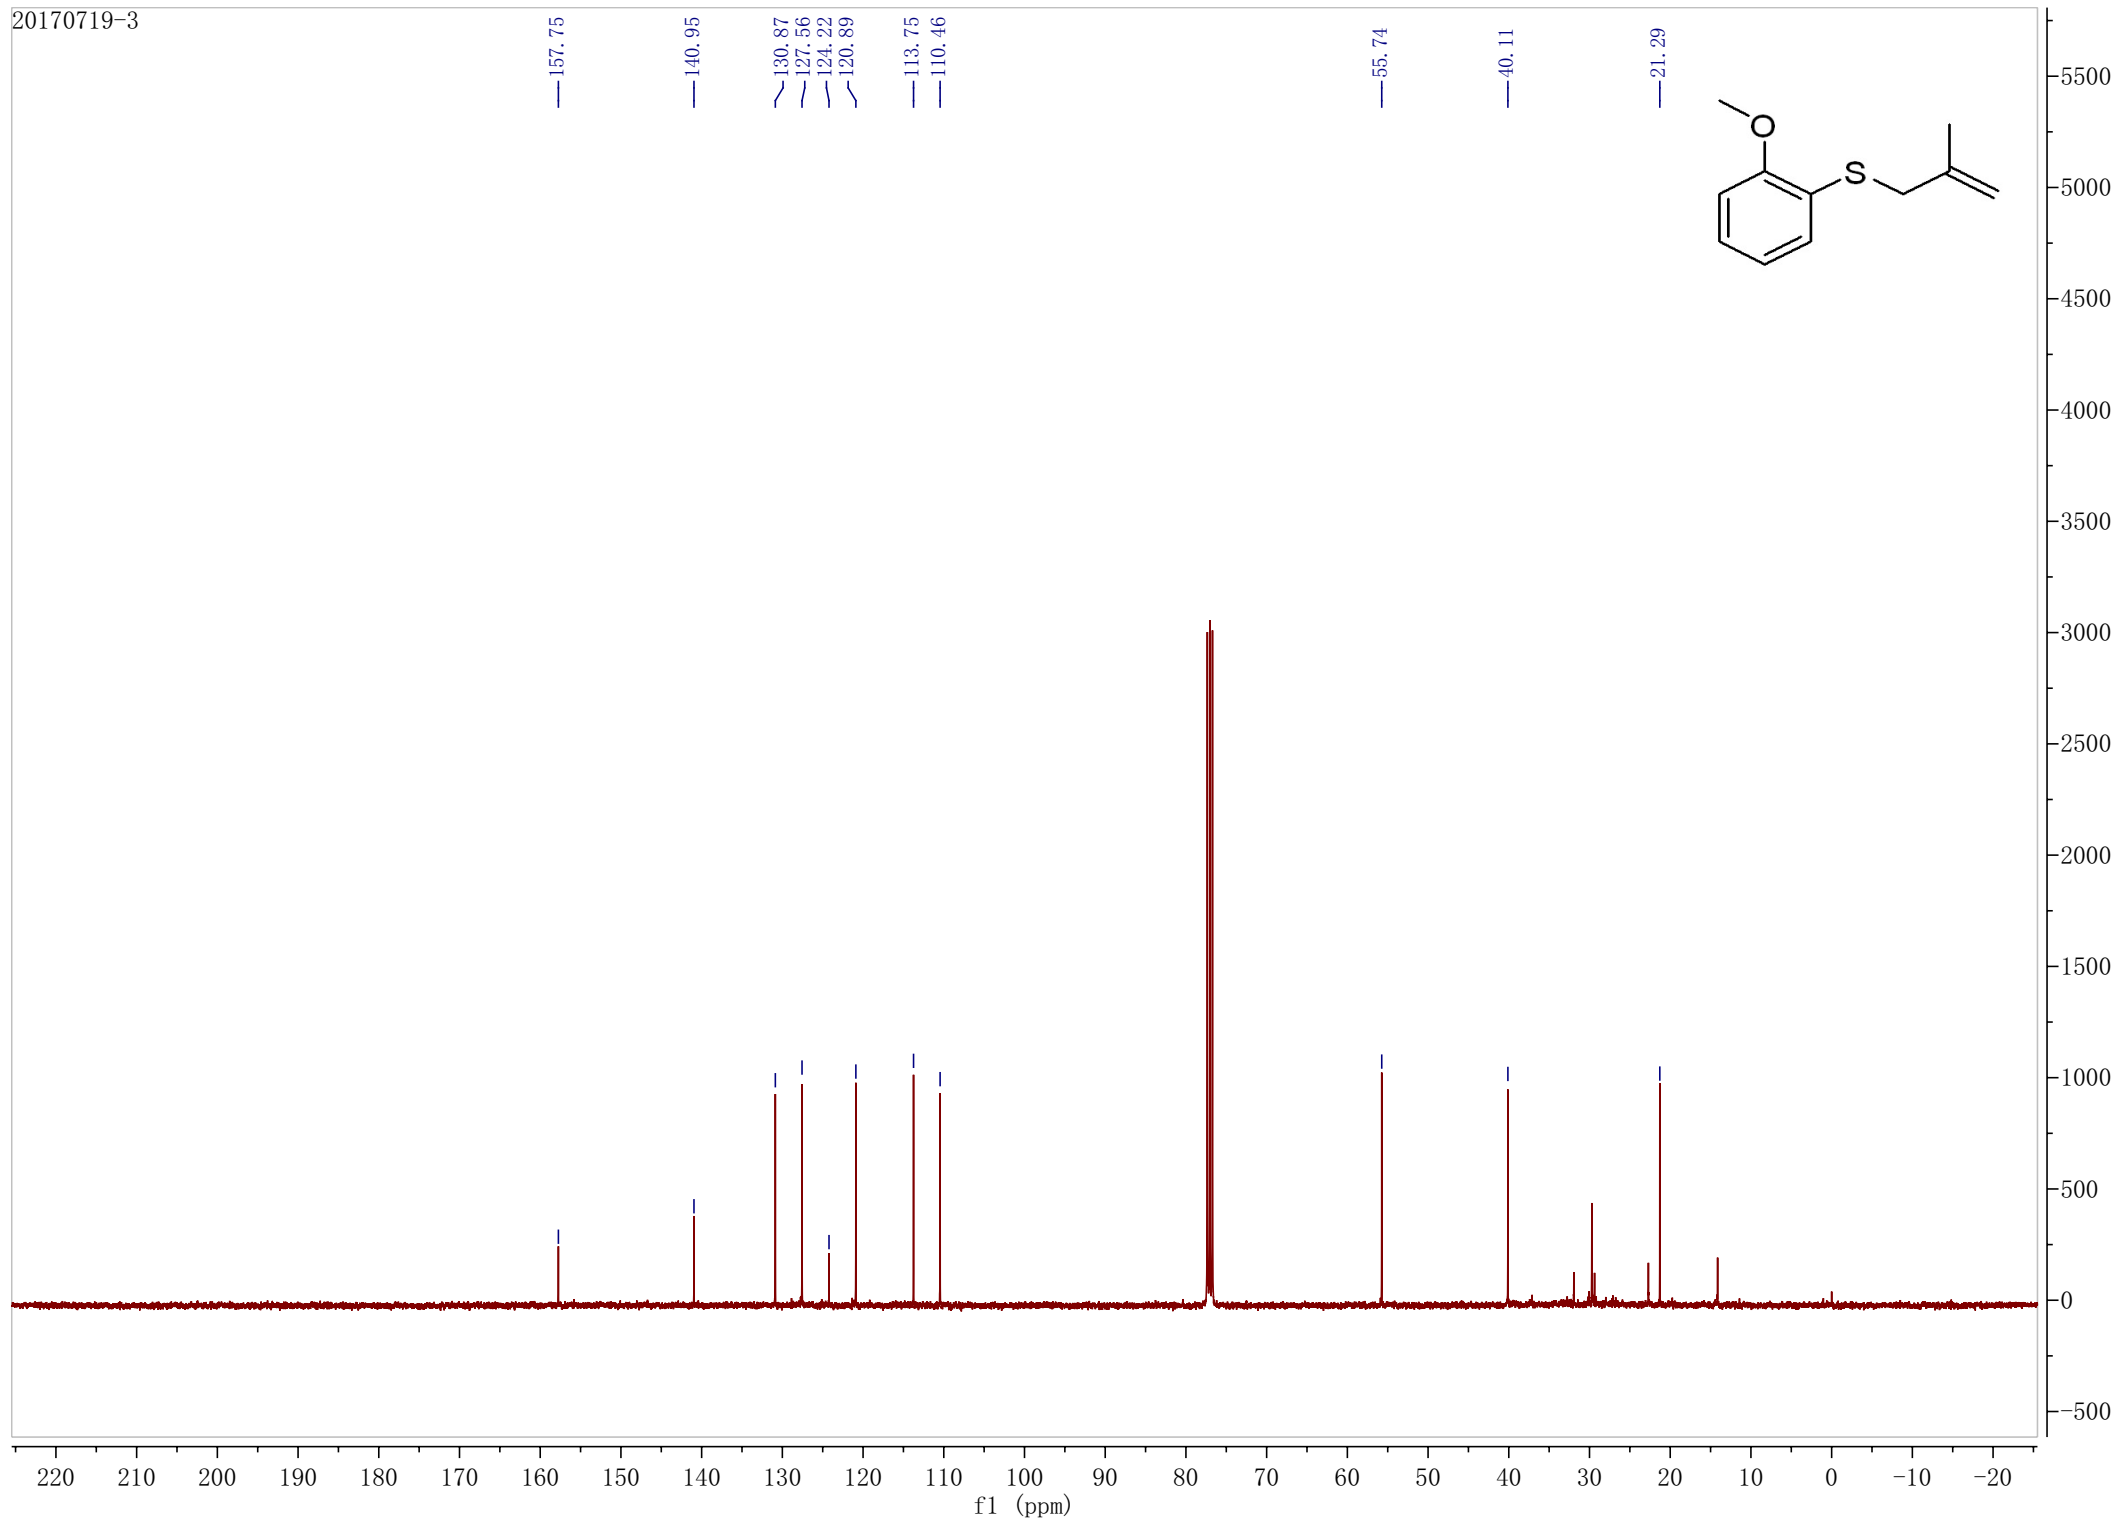

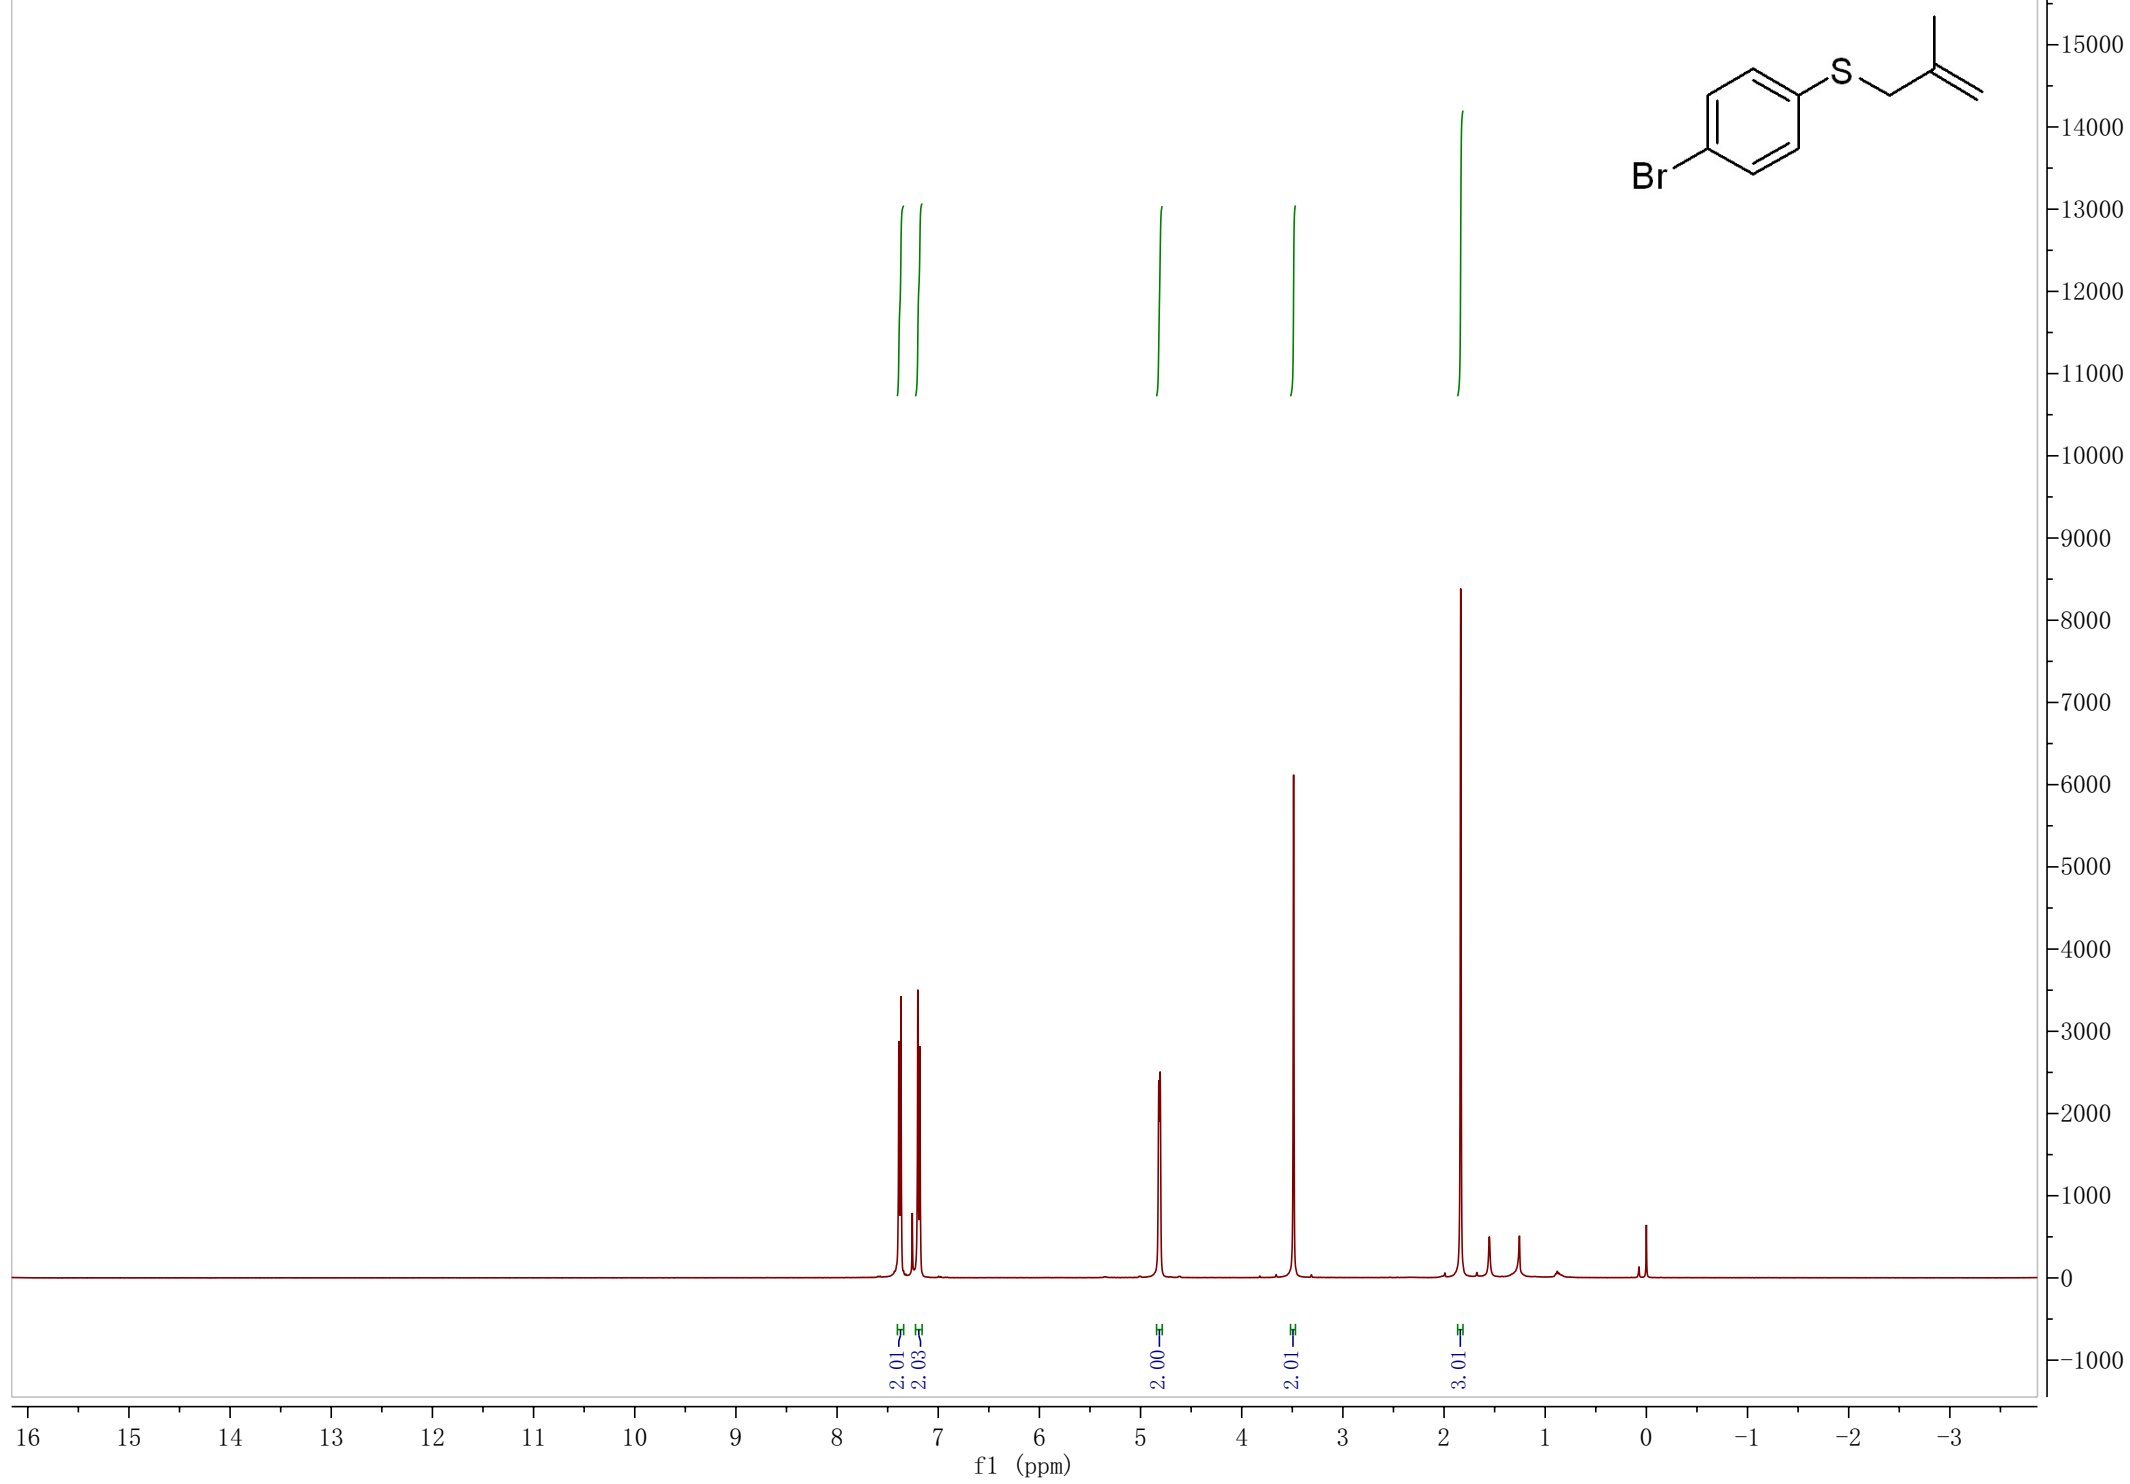

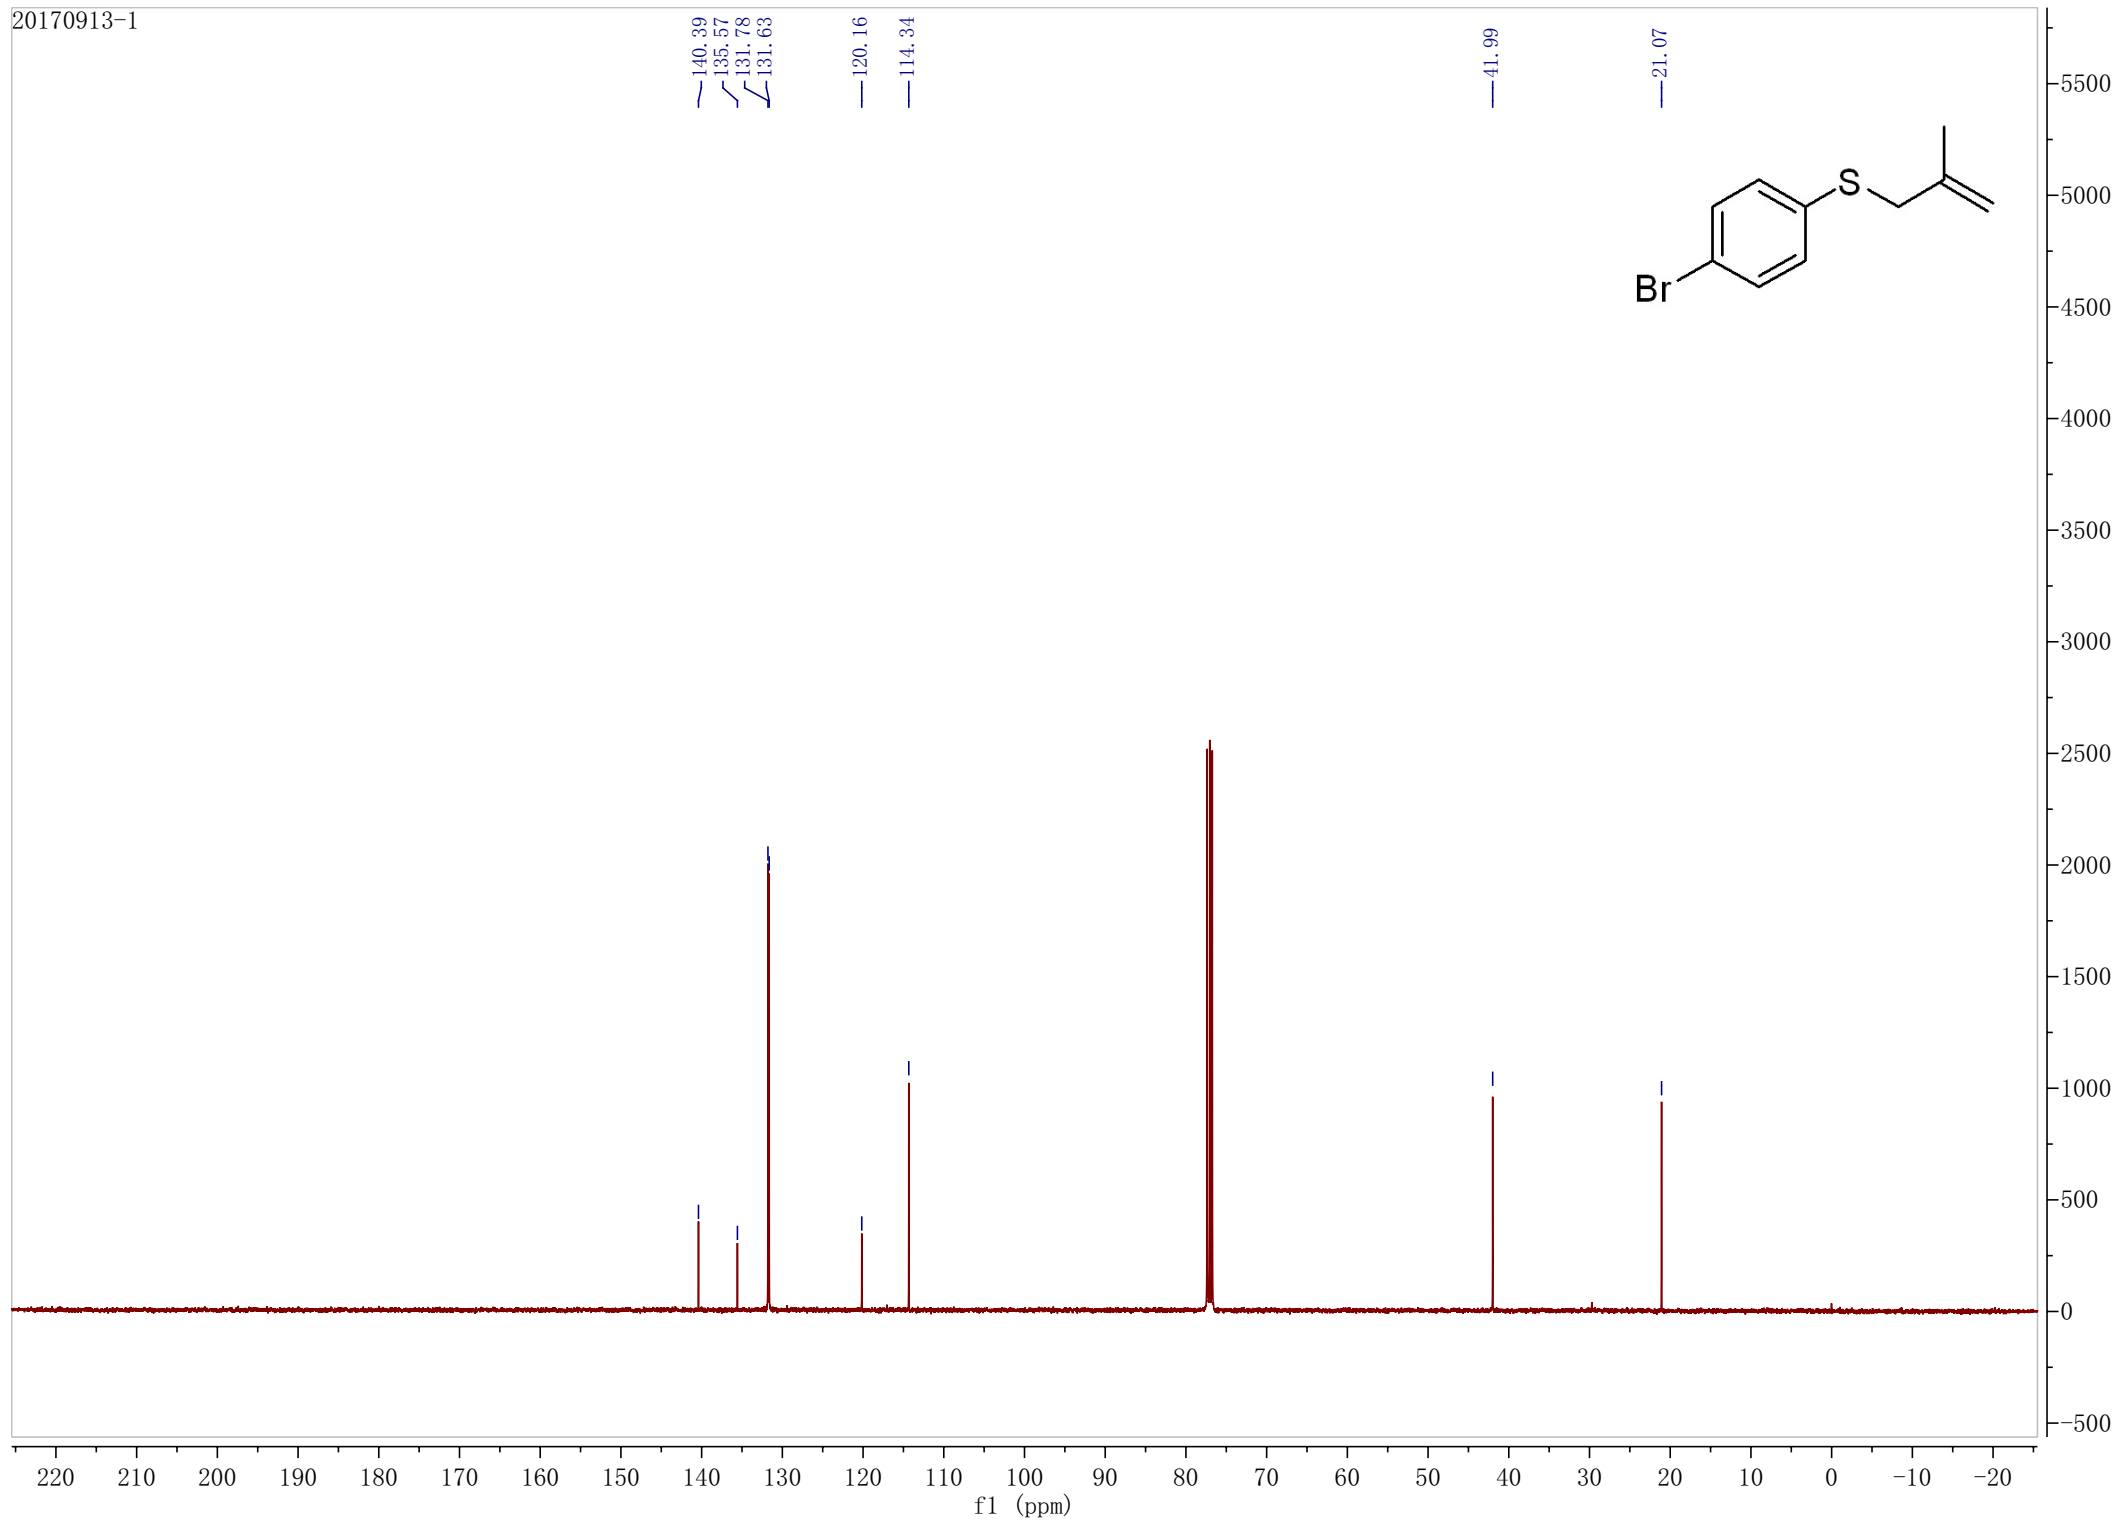

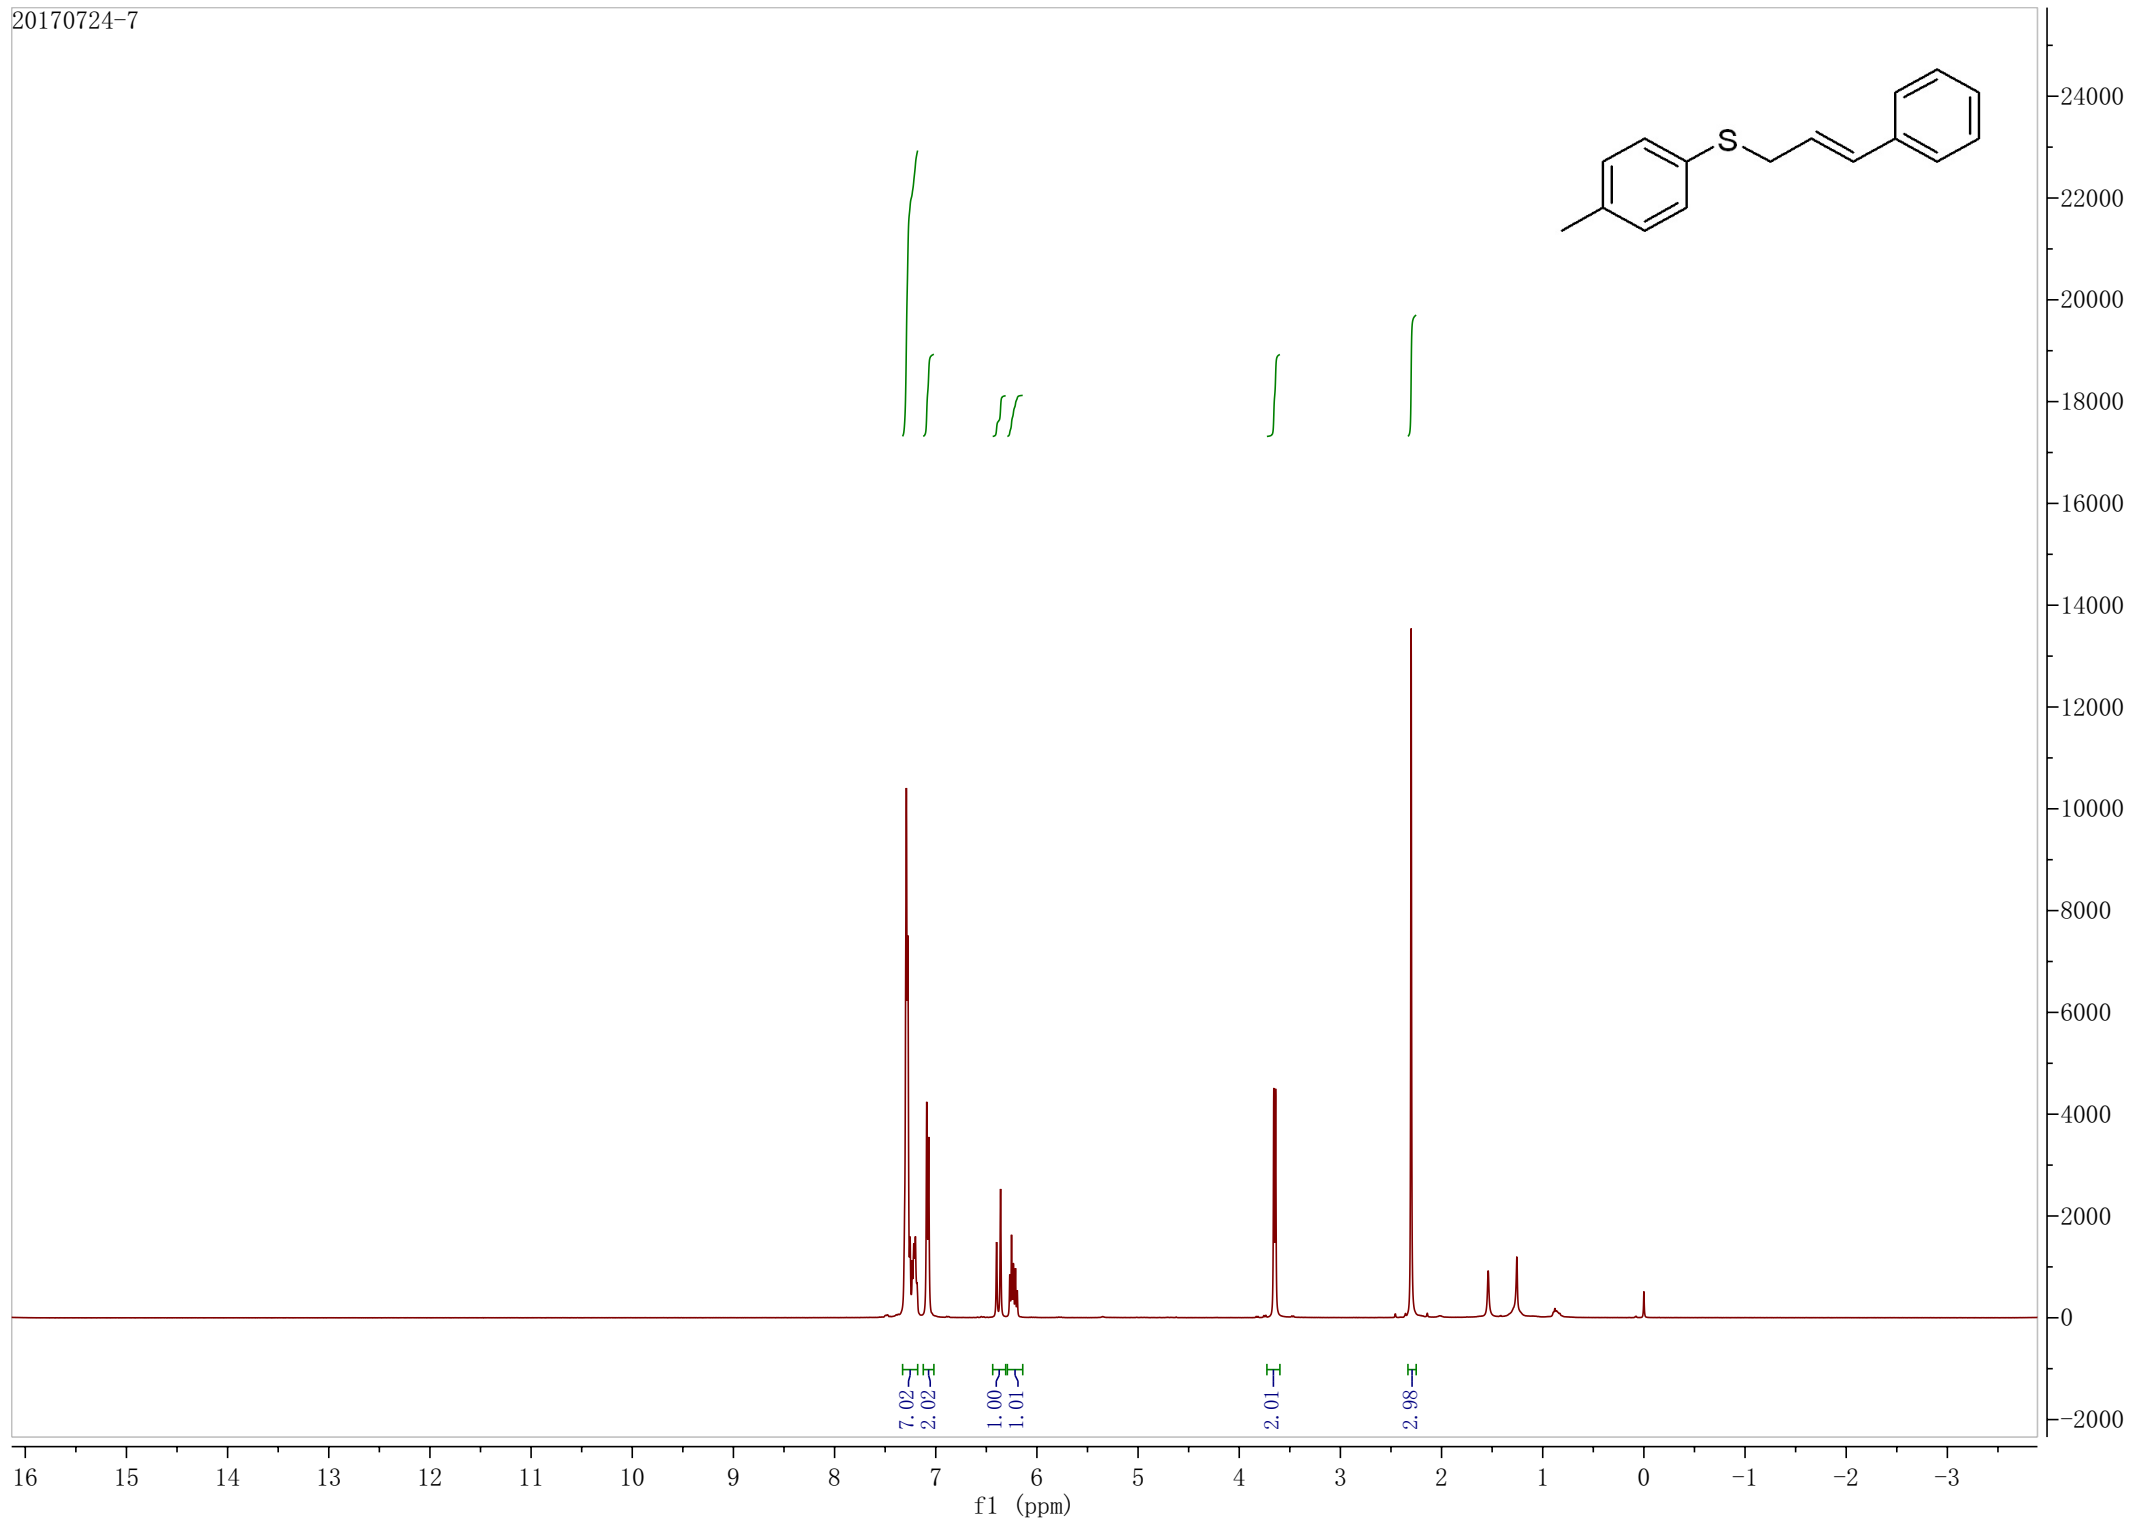

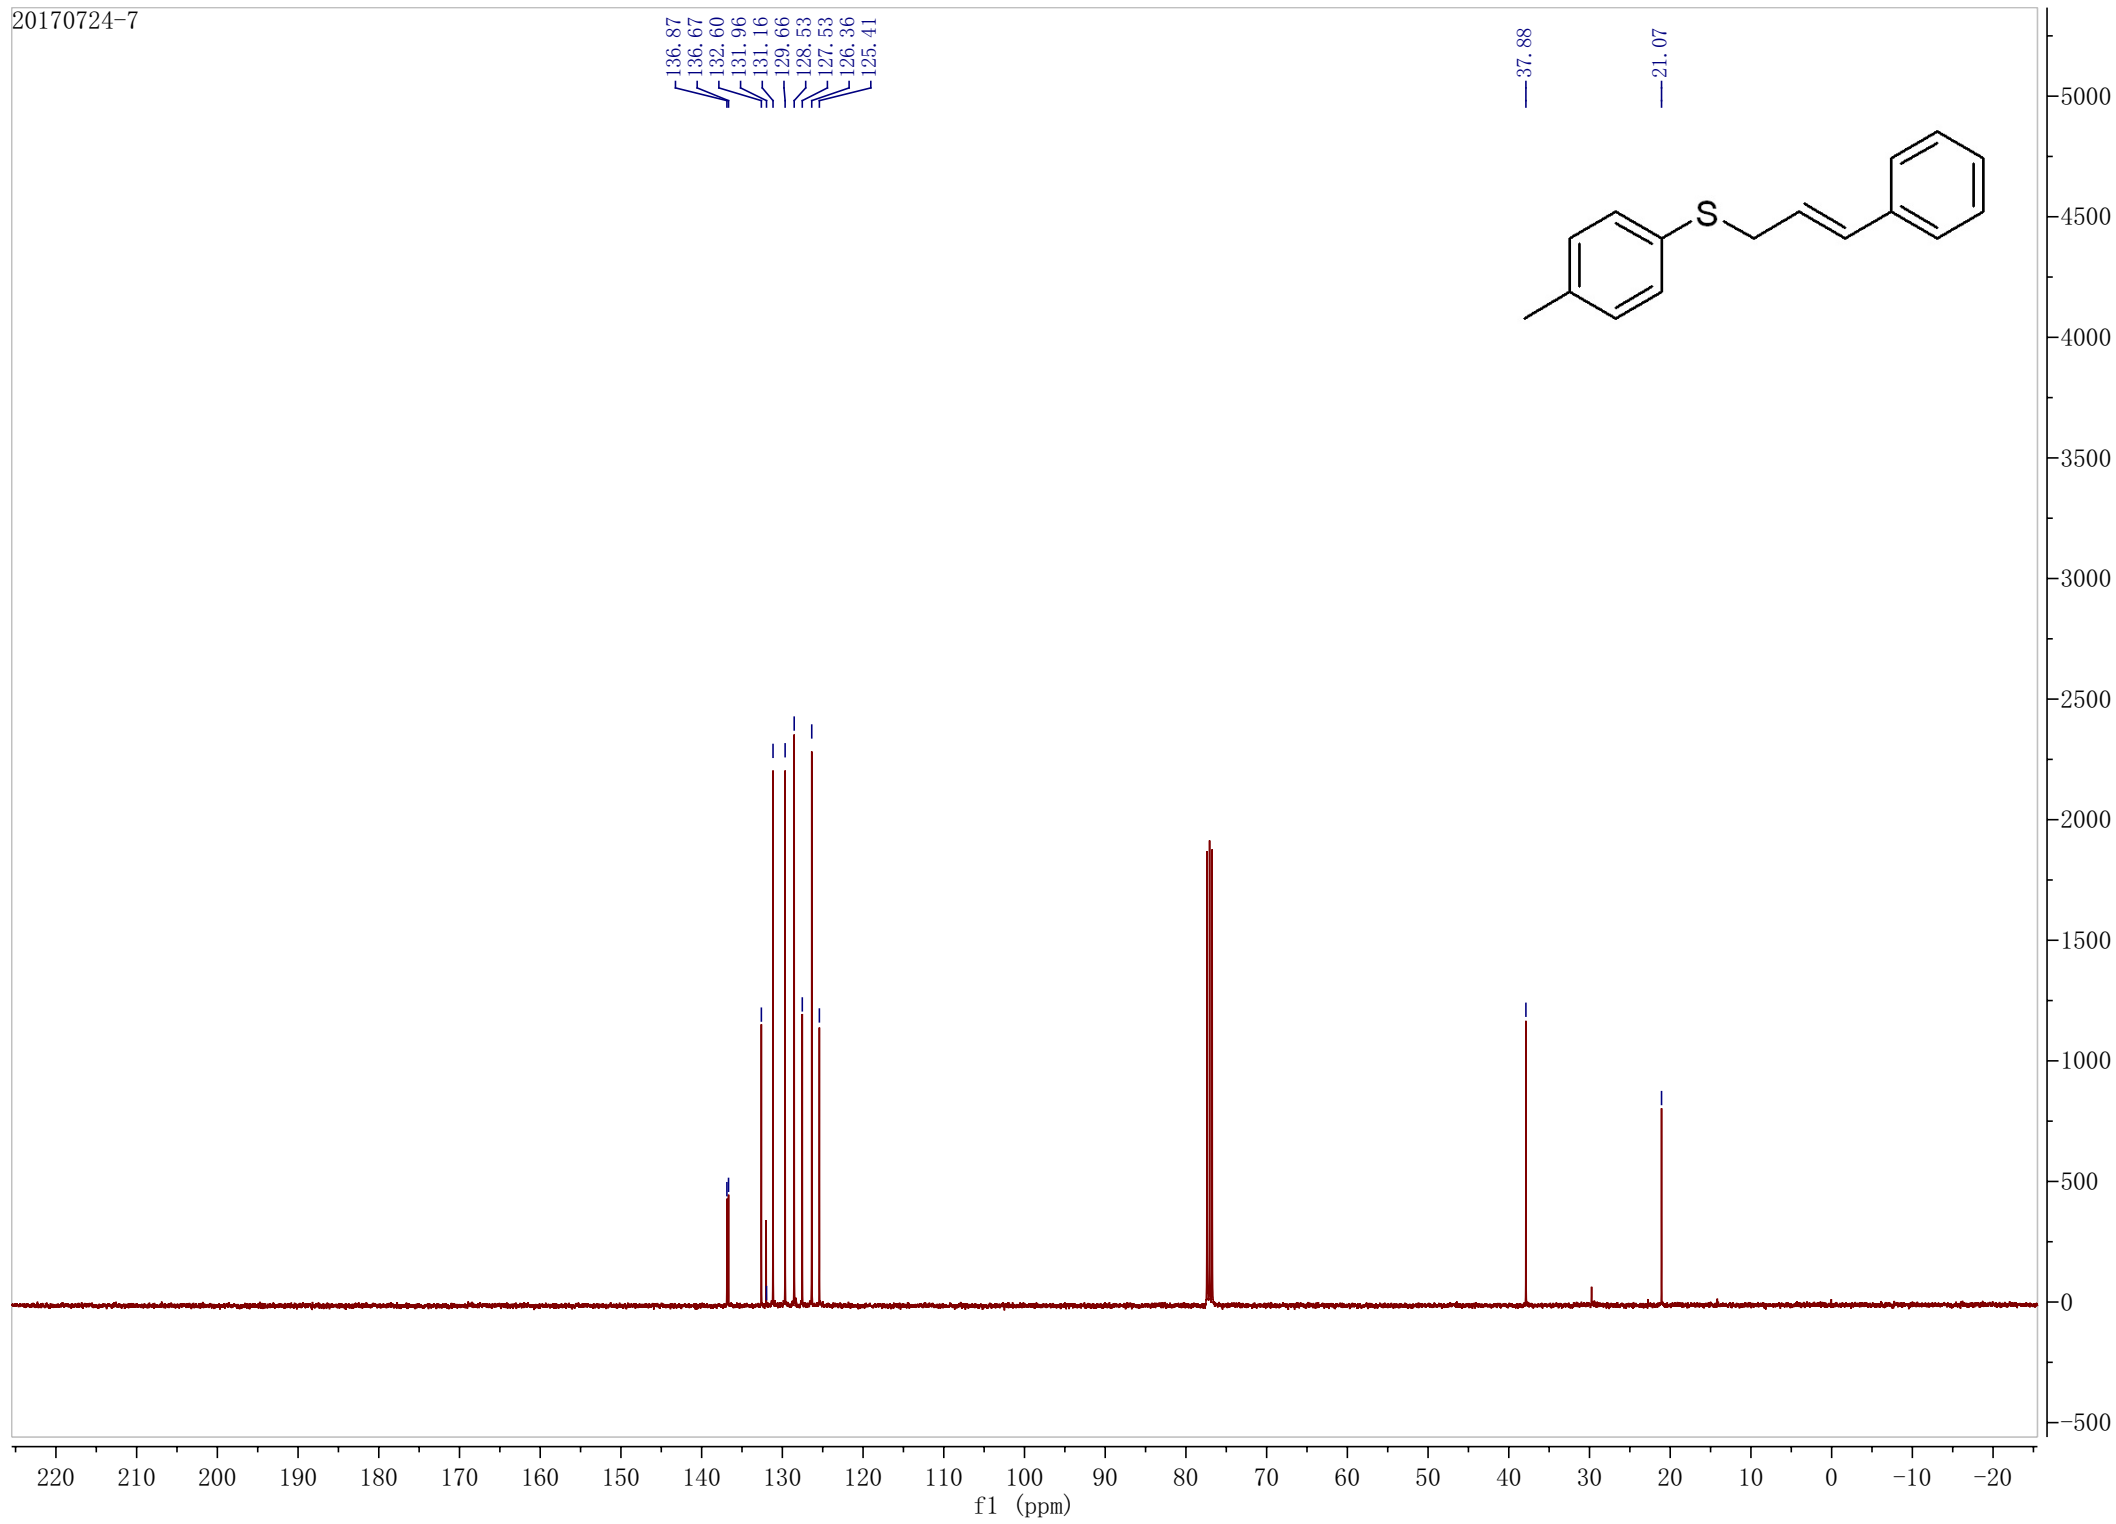

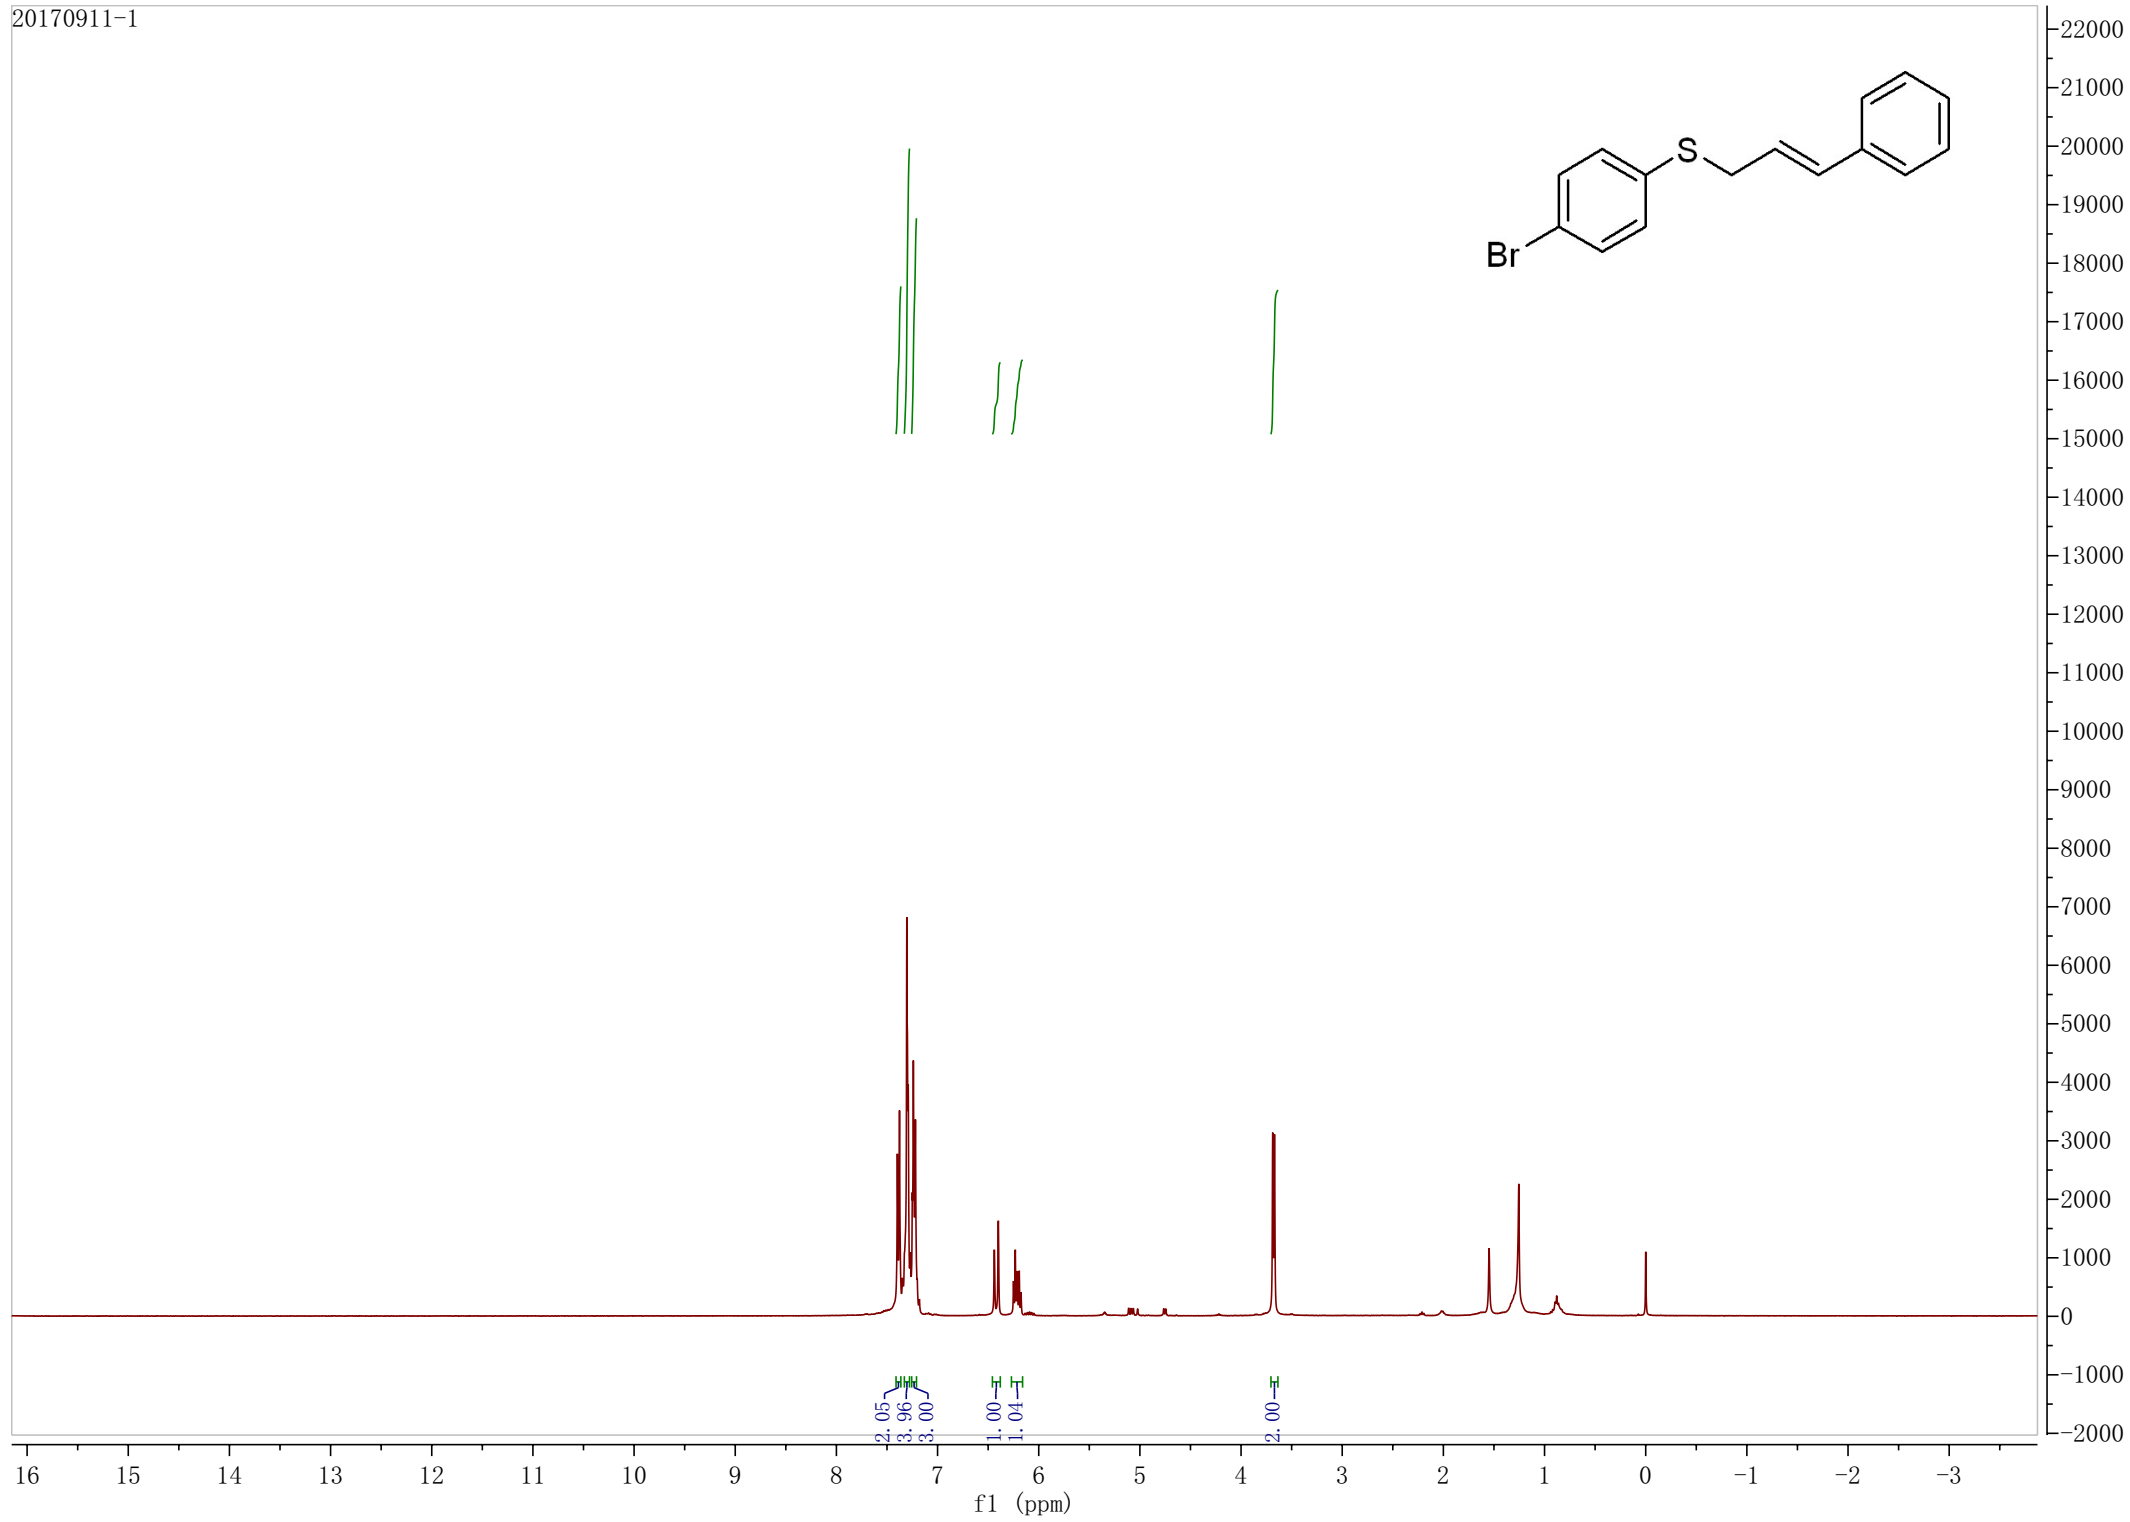

20170911-1

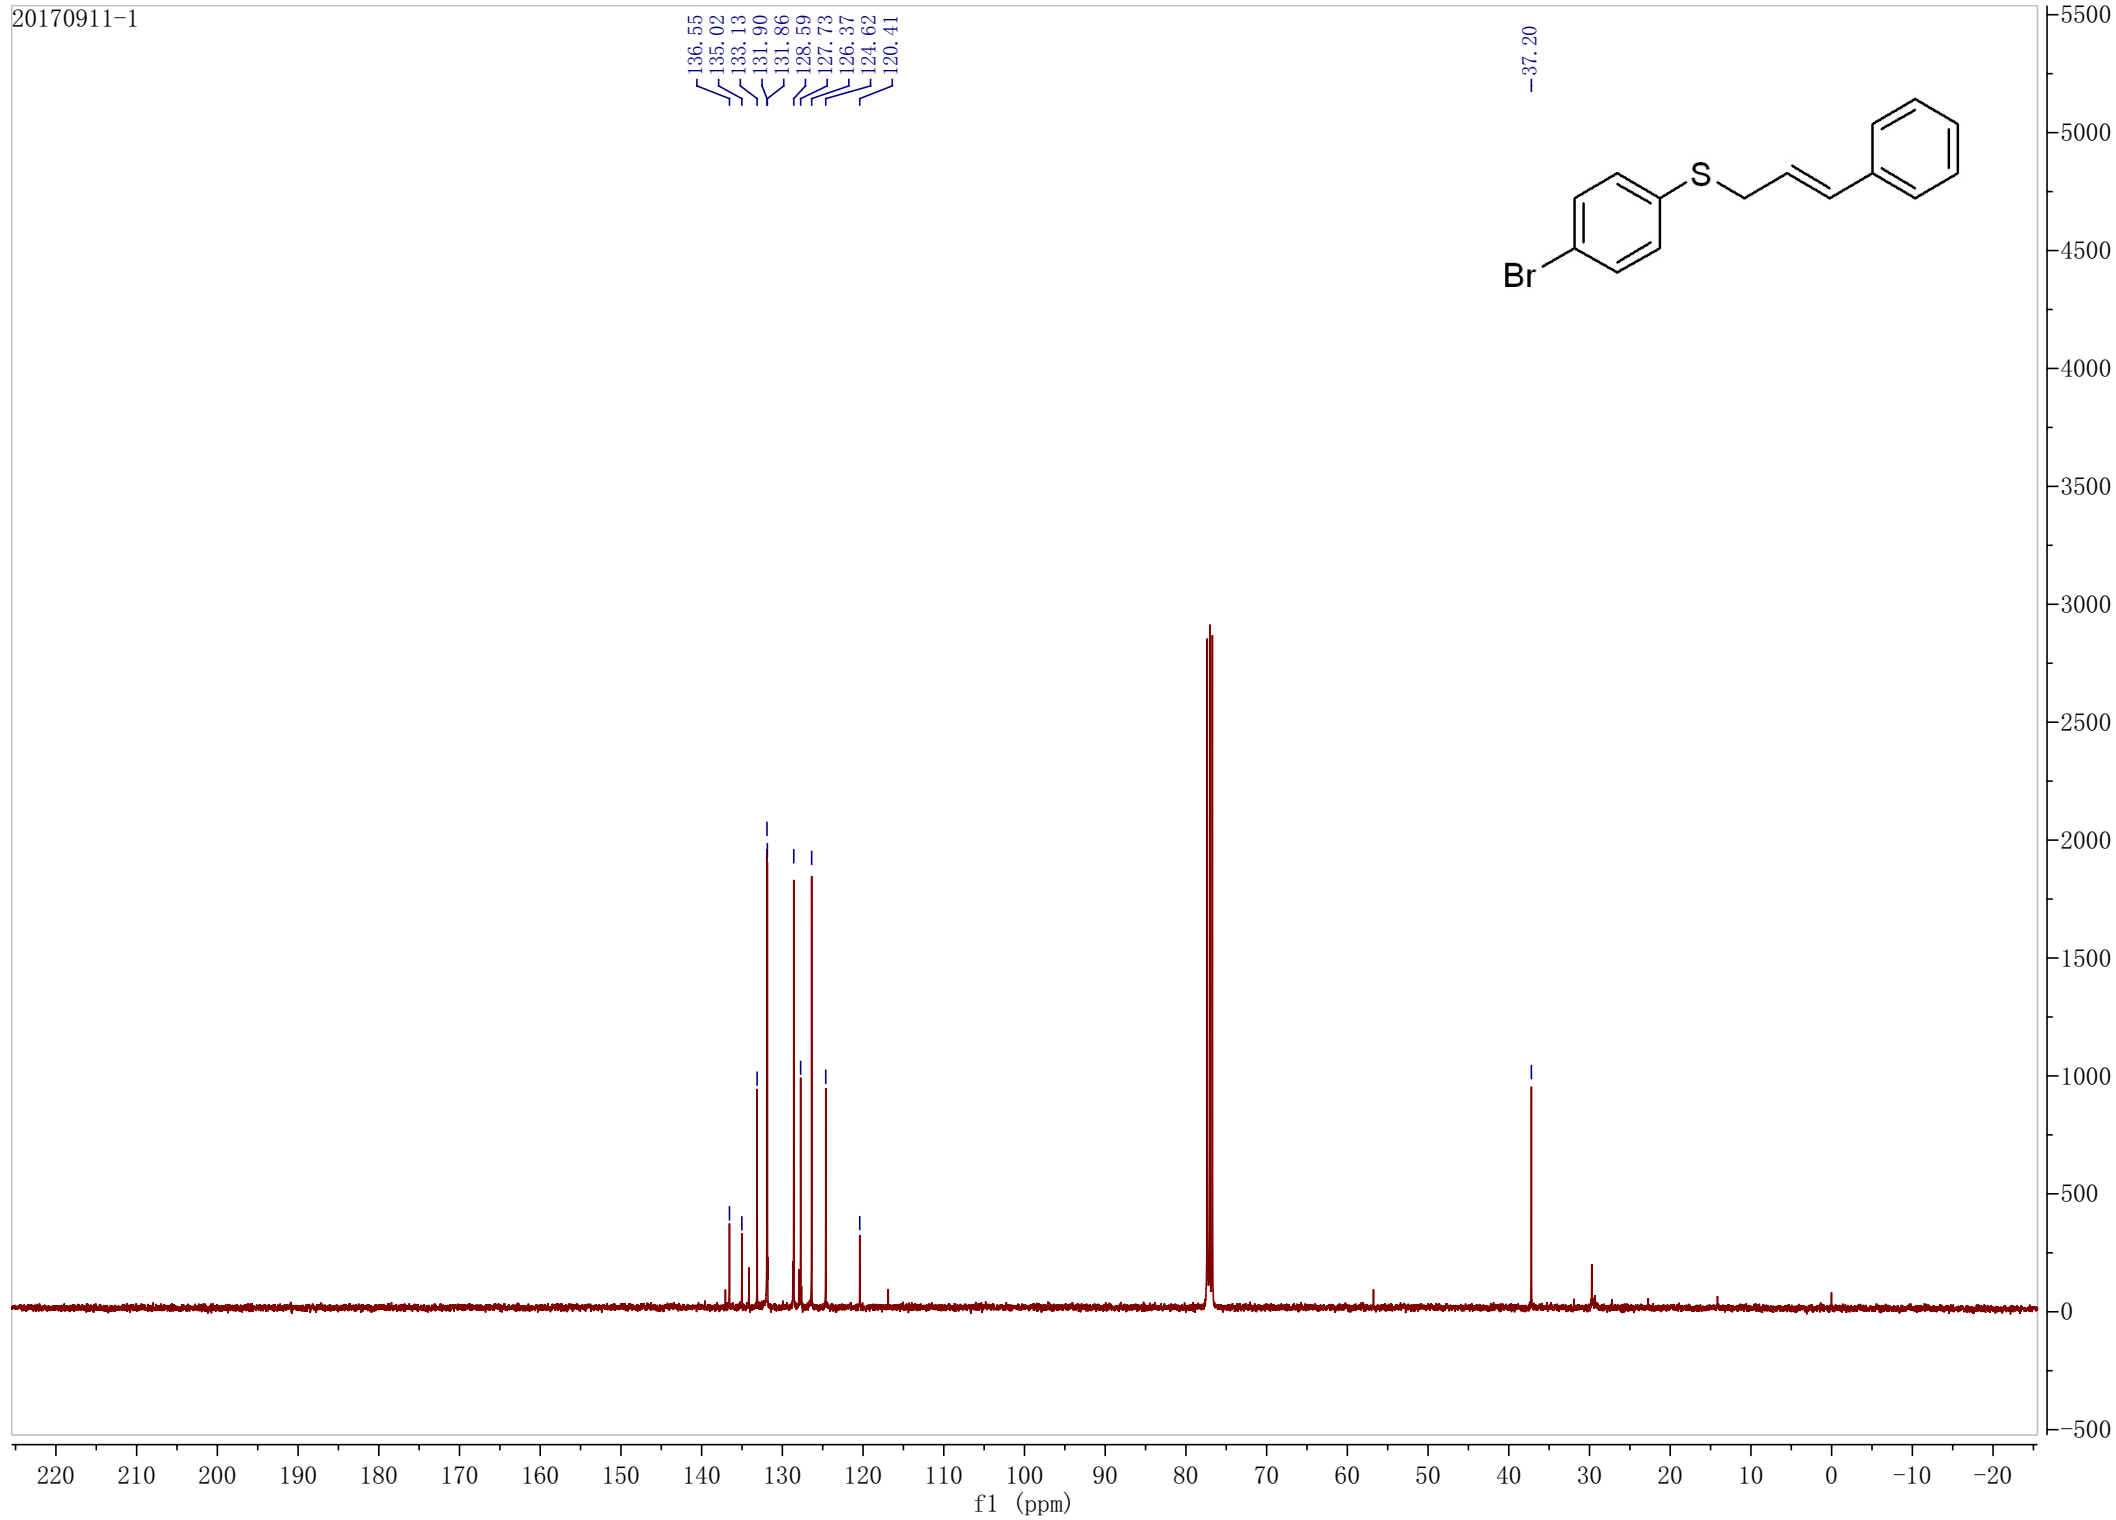

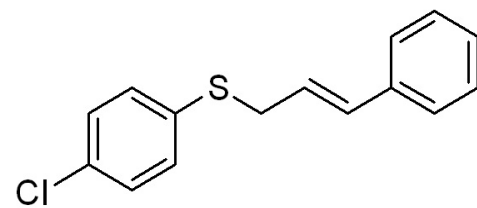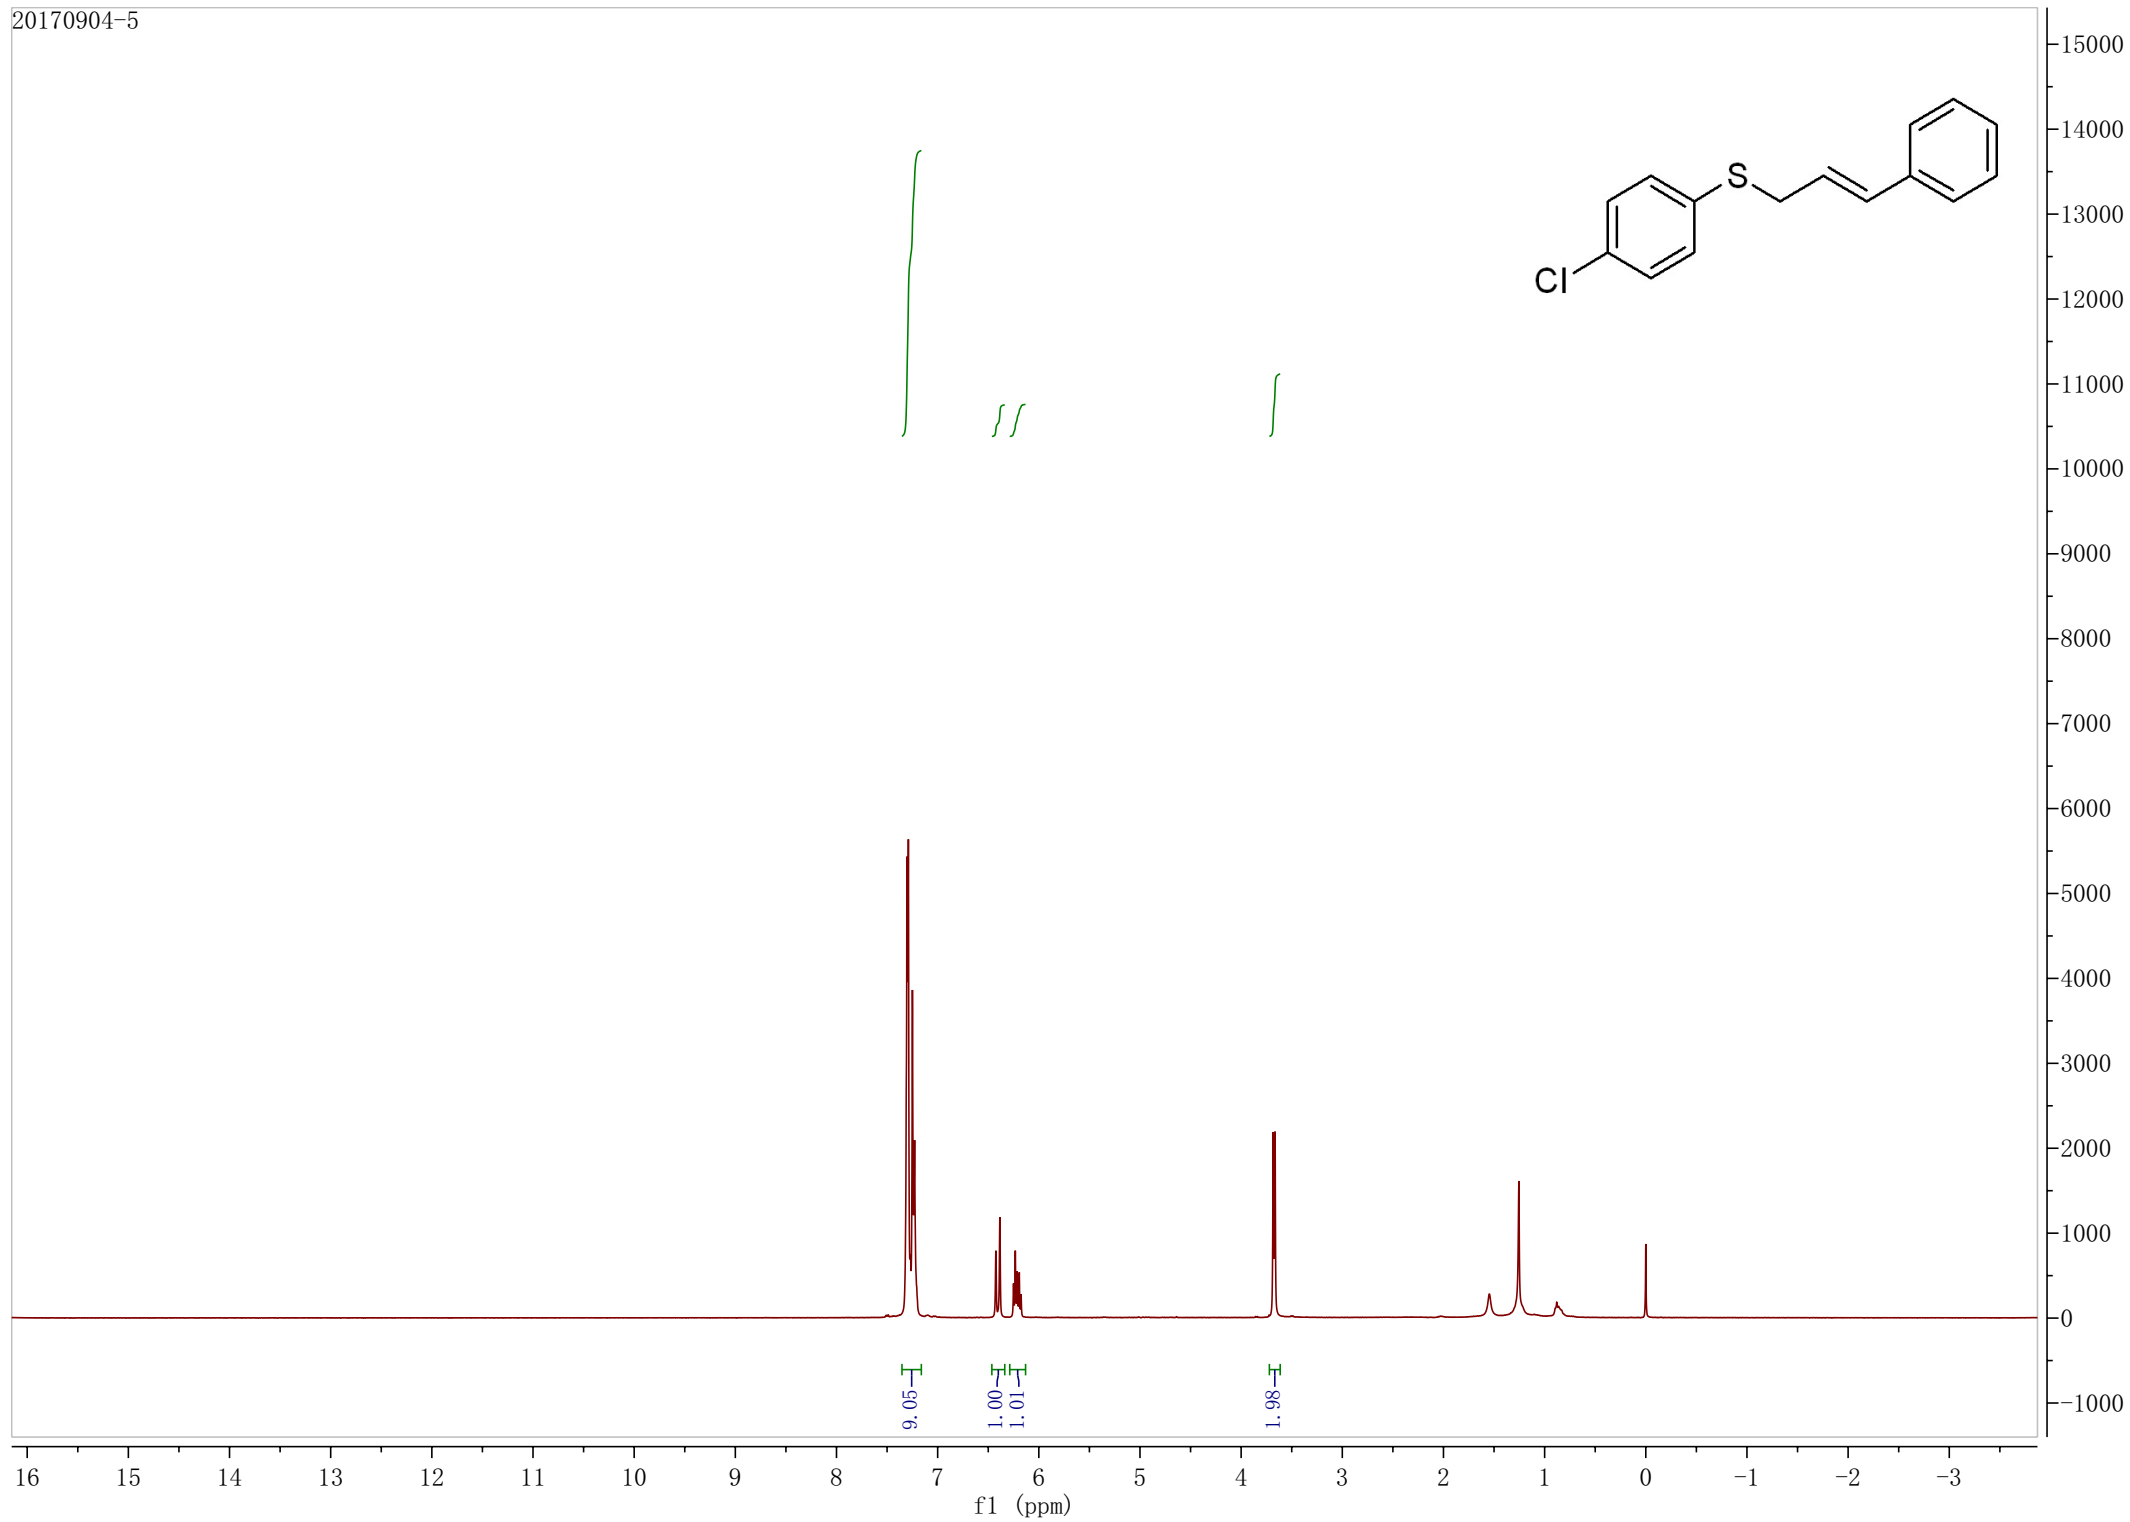



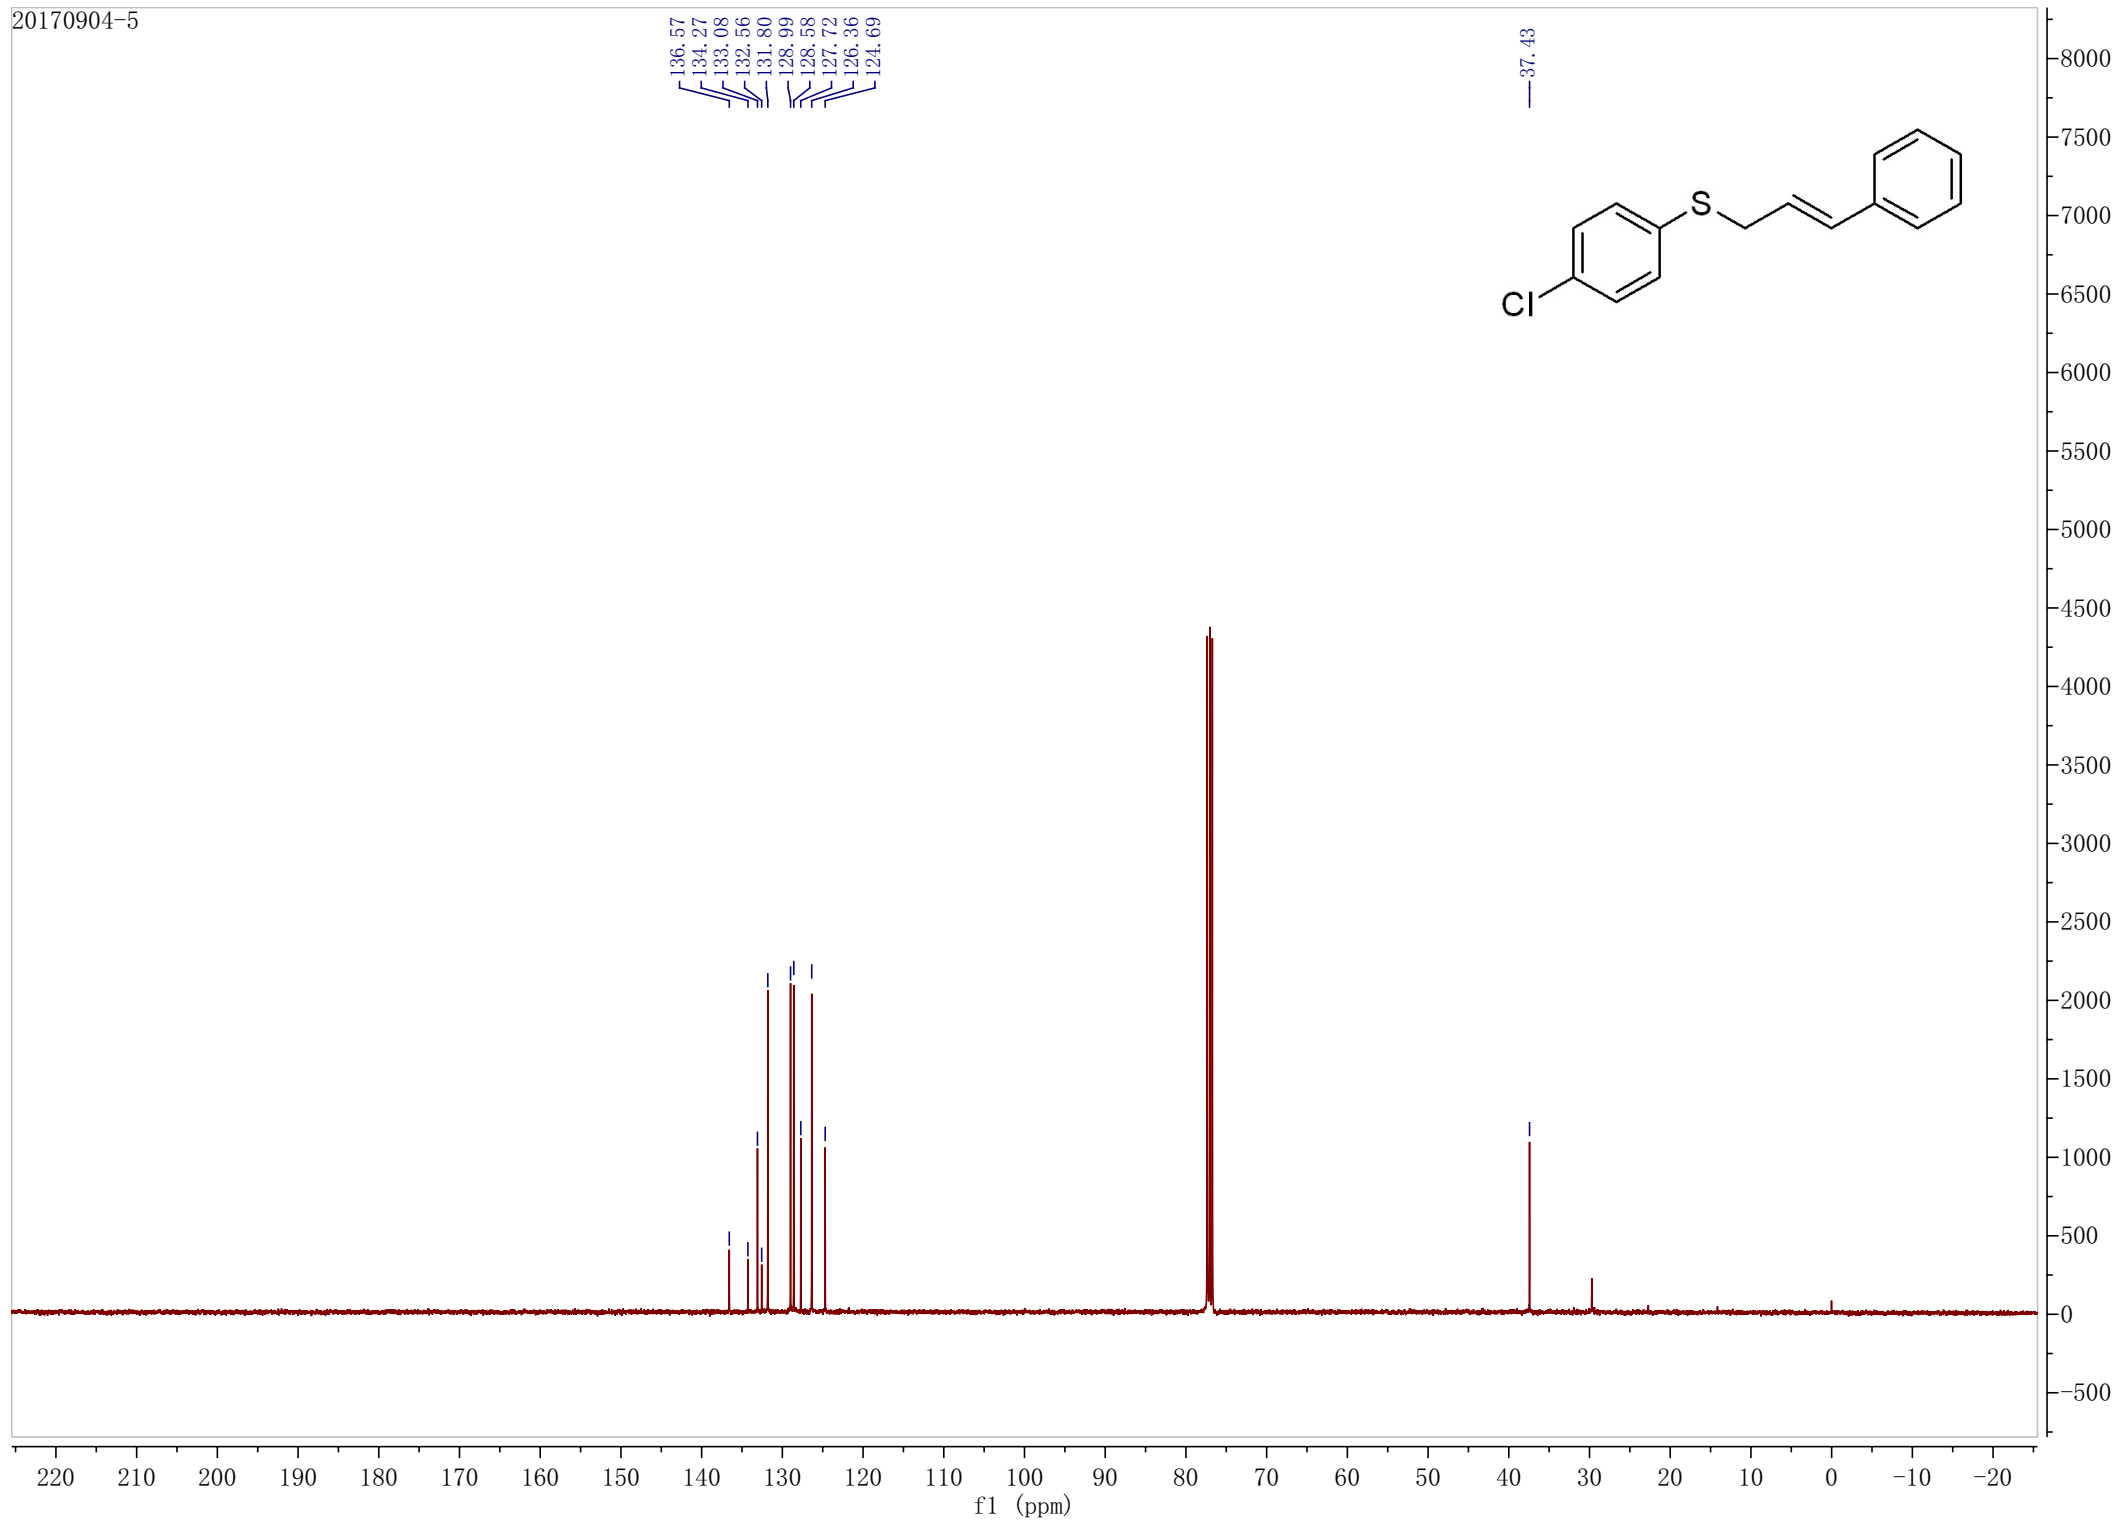

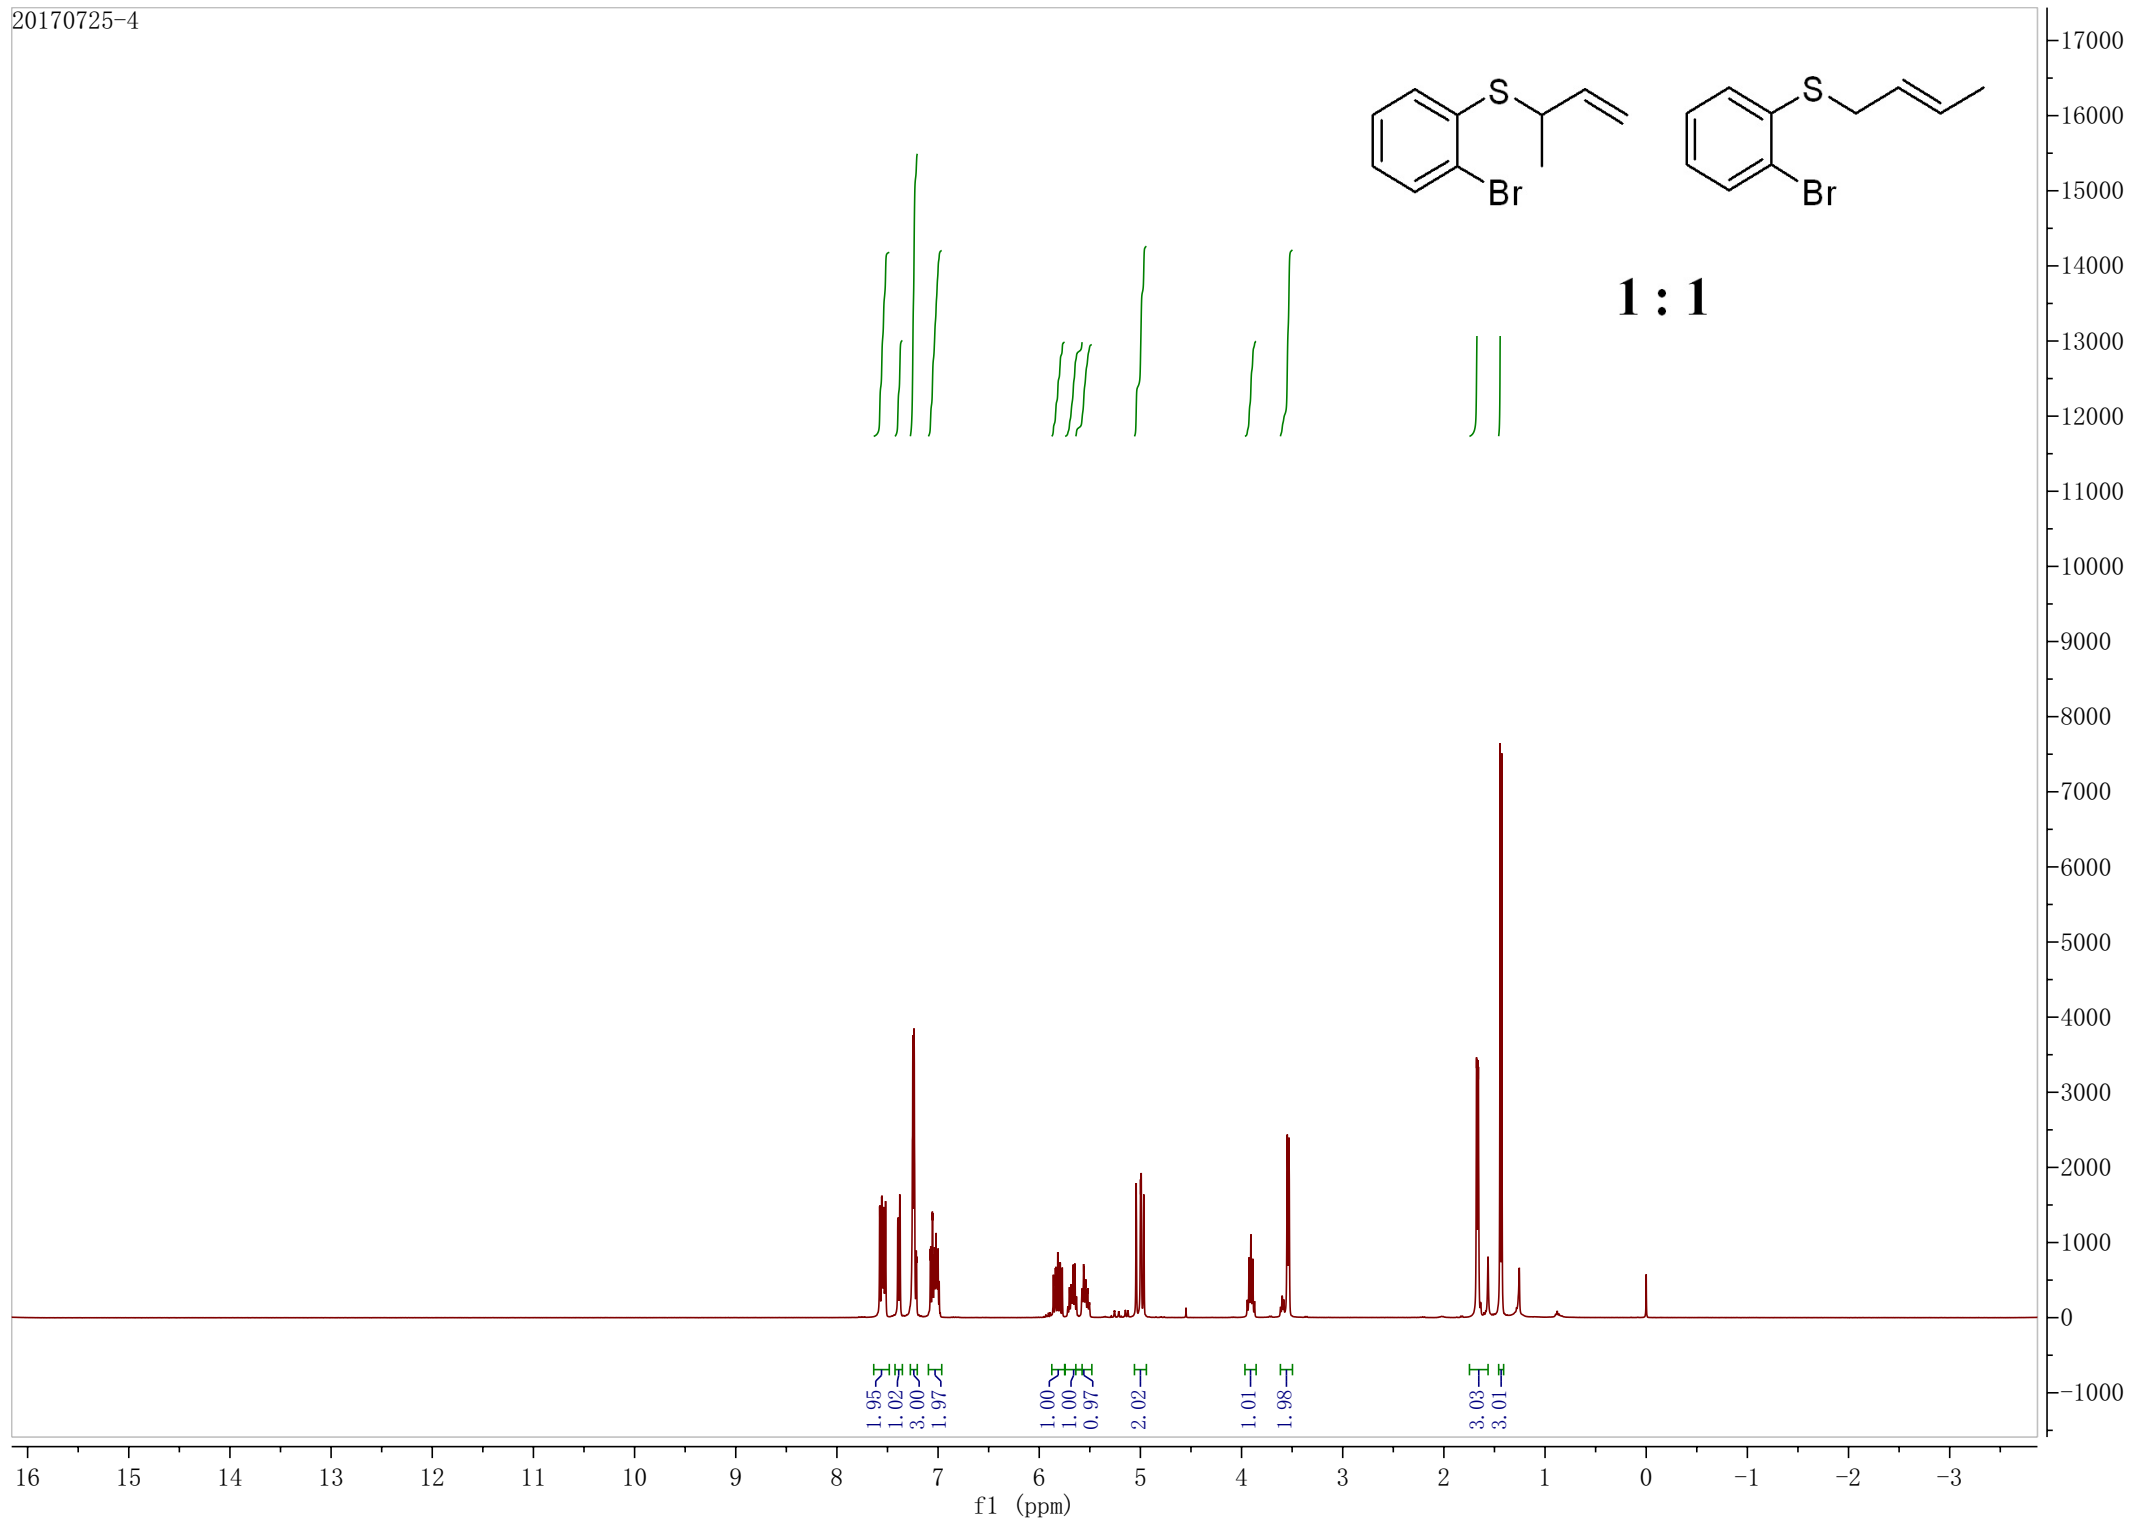

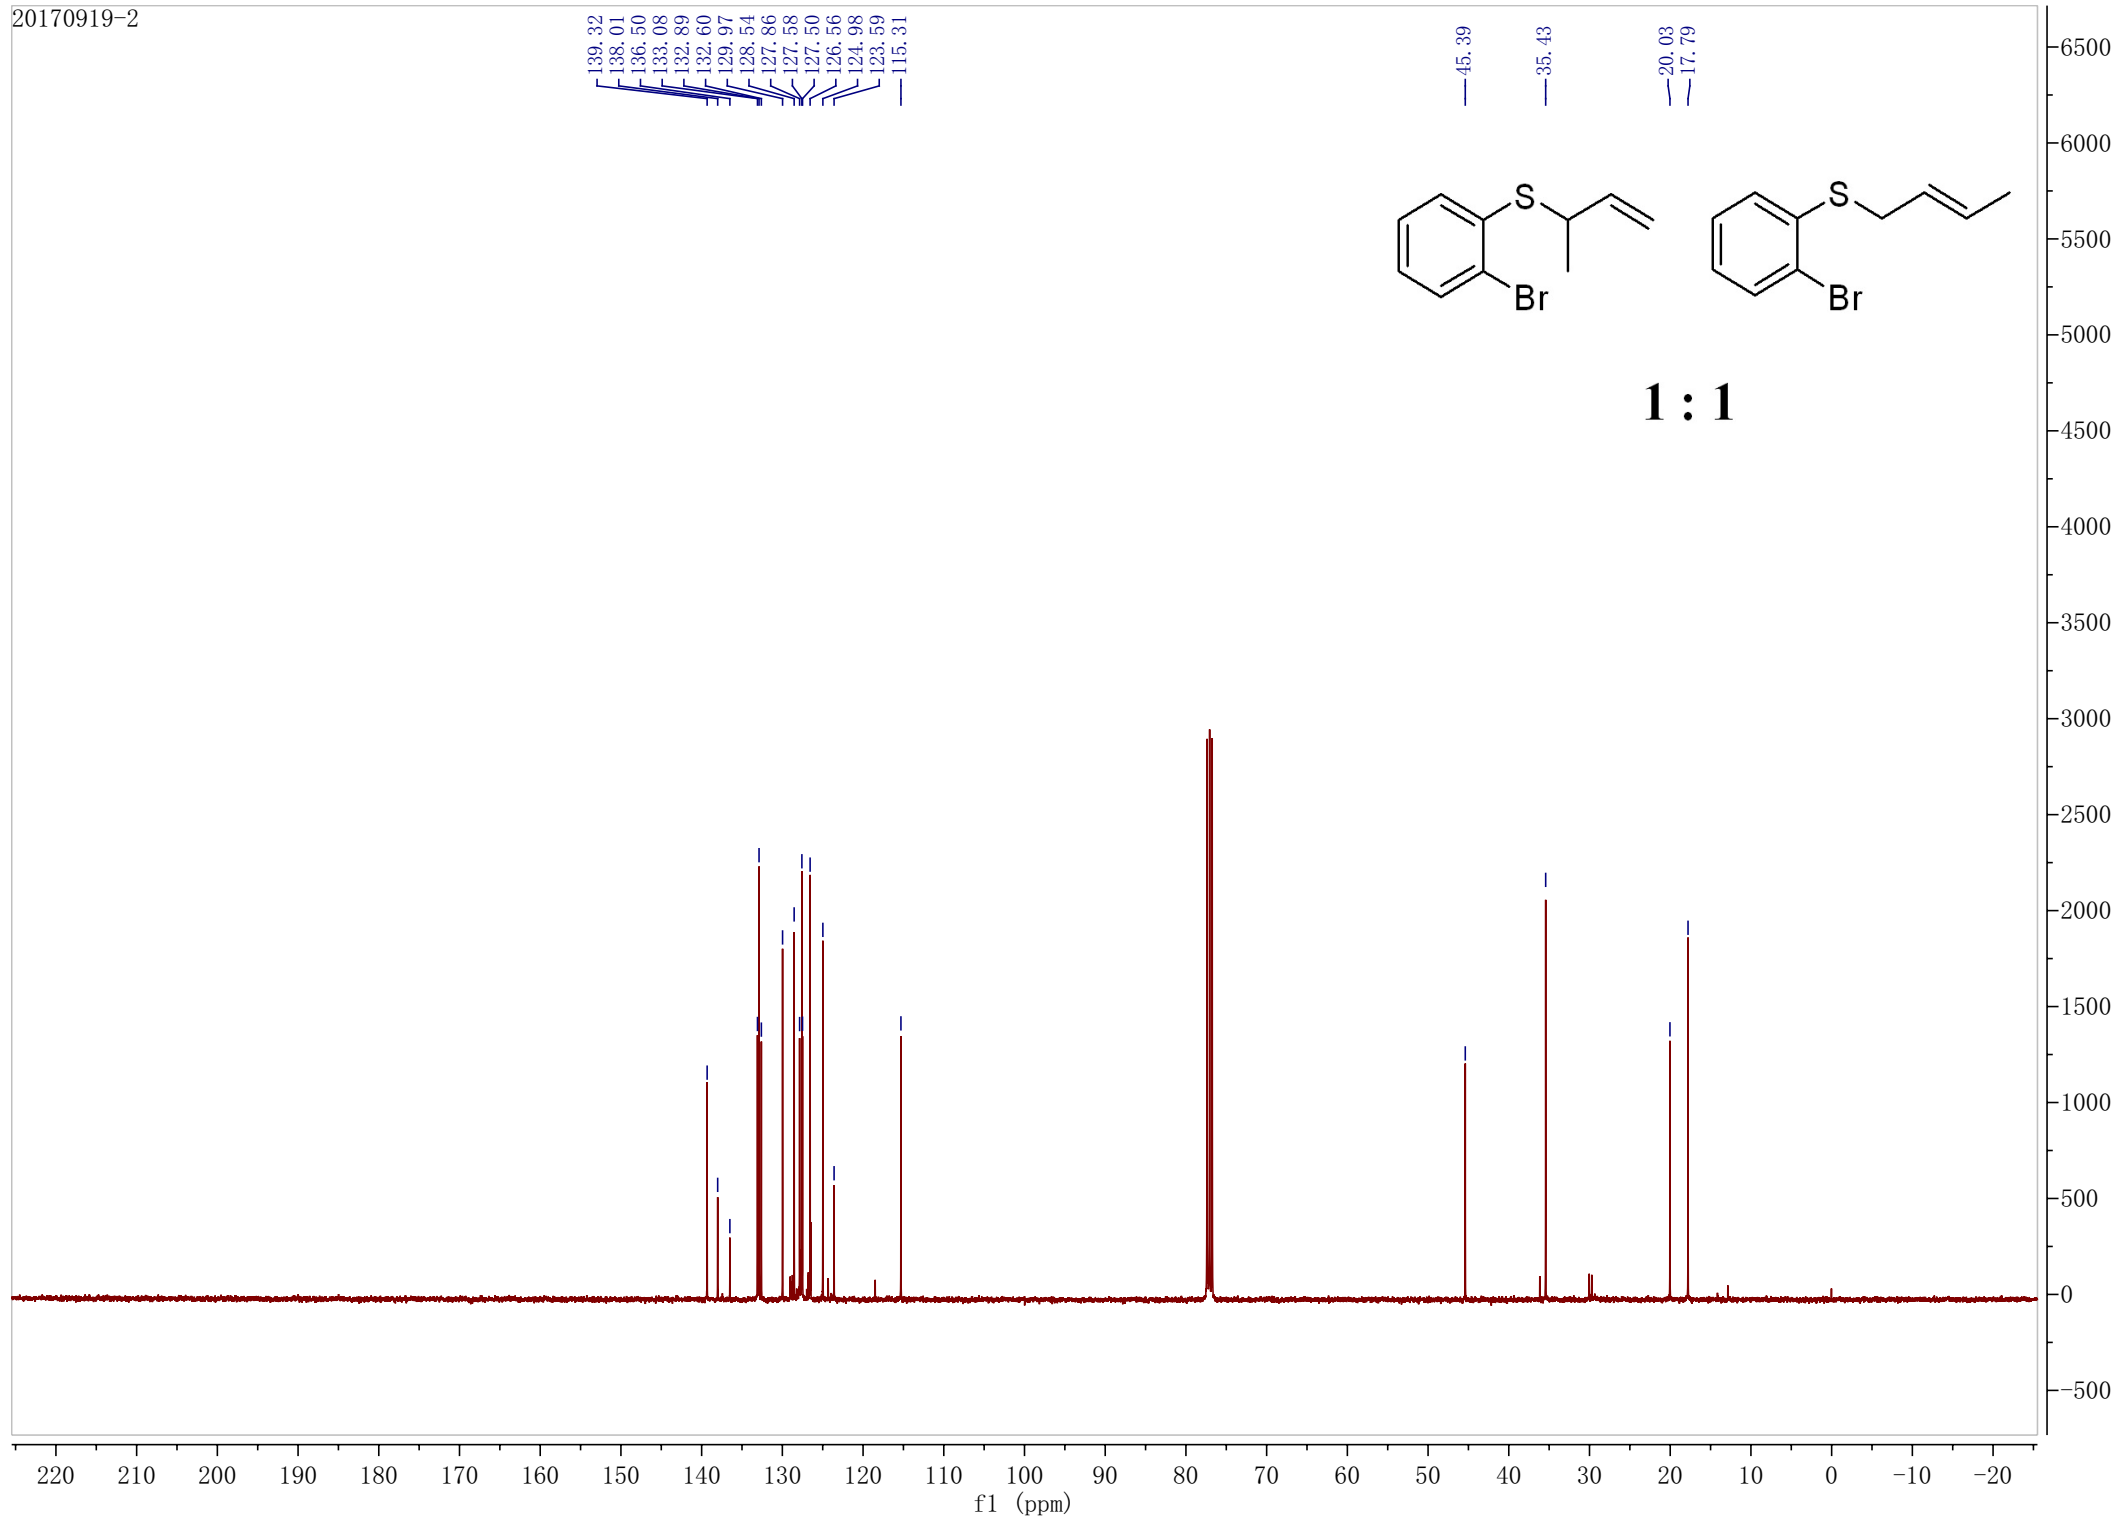

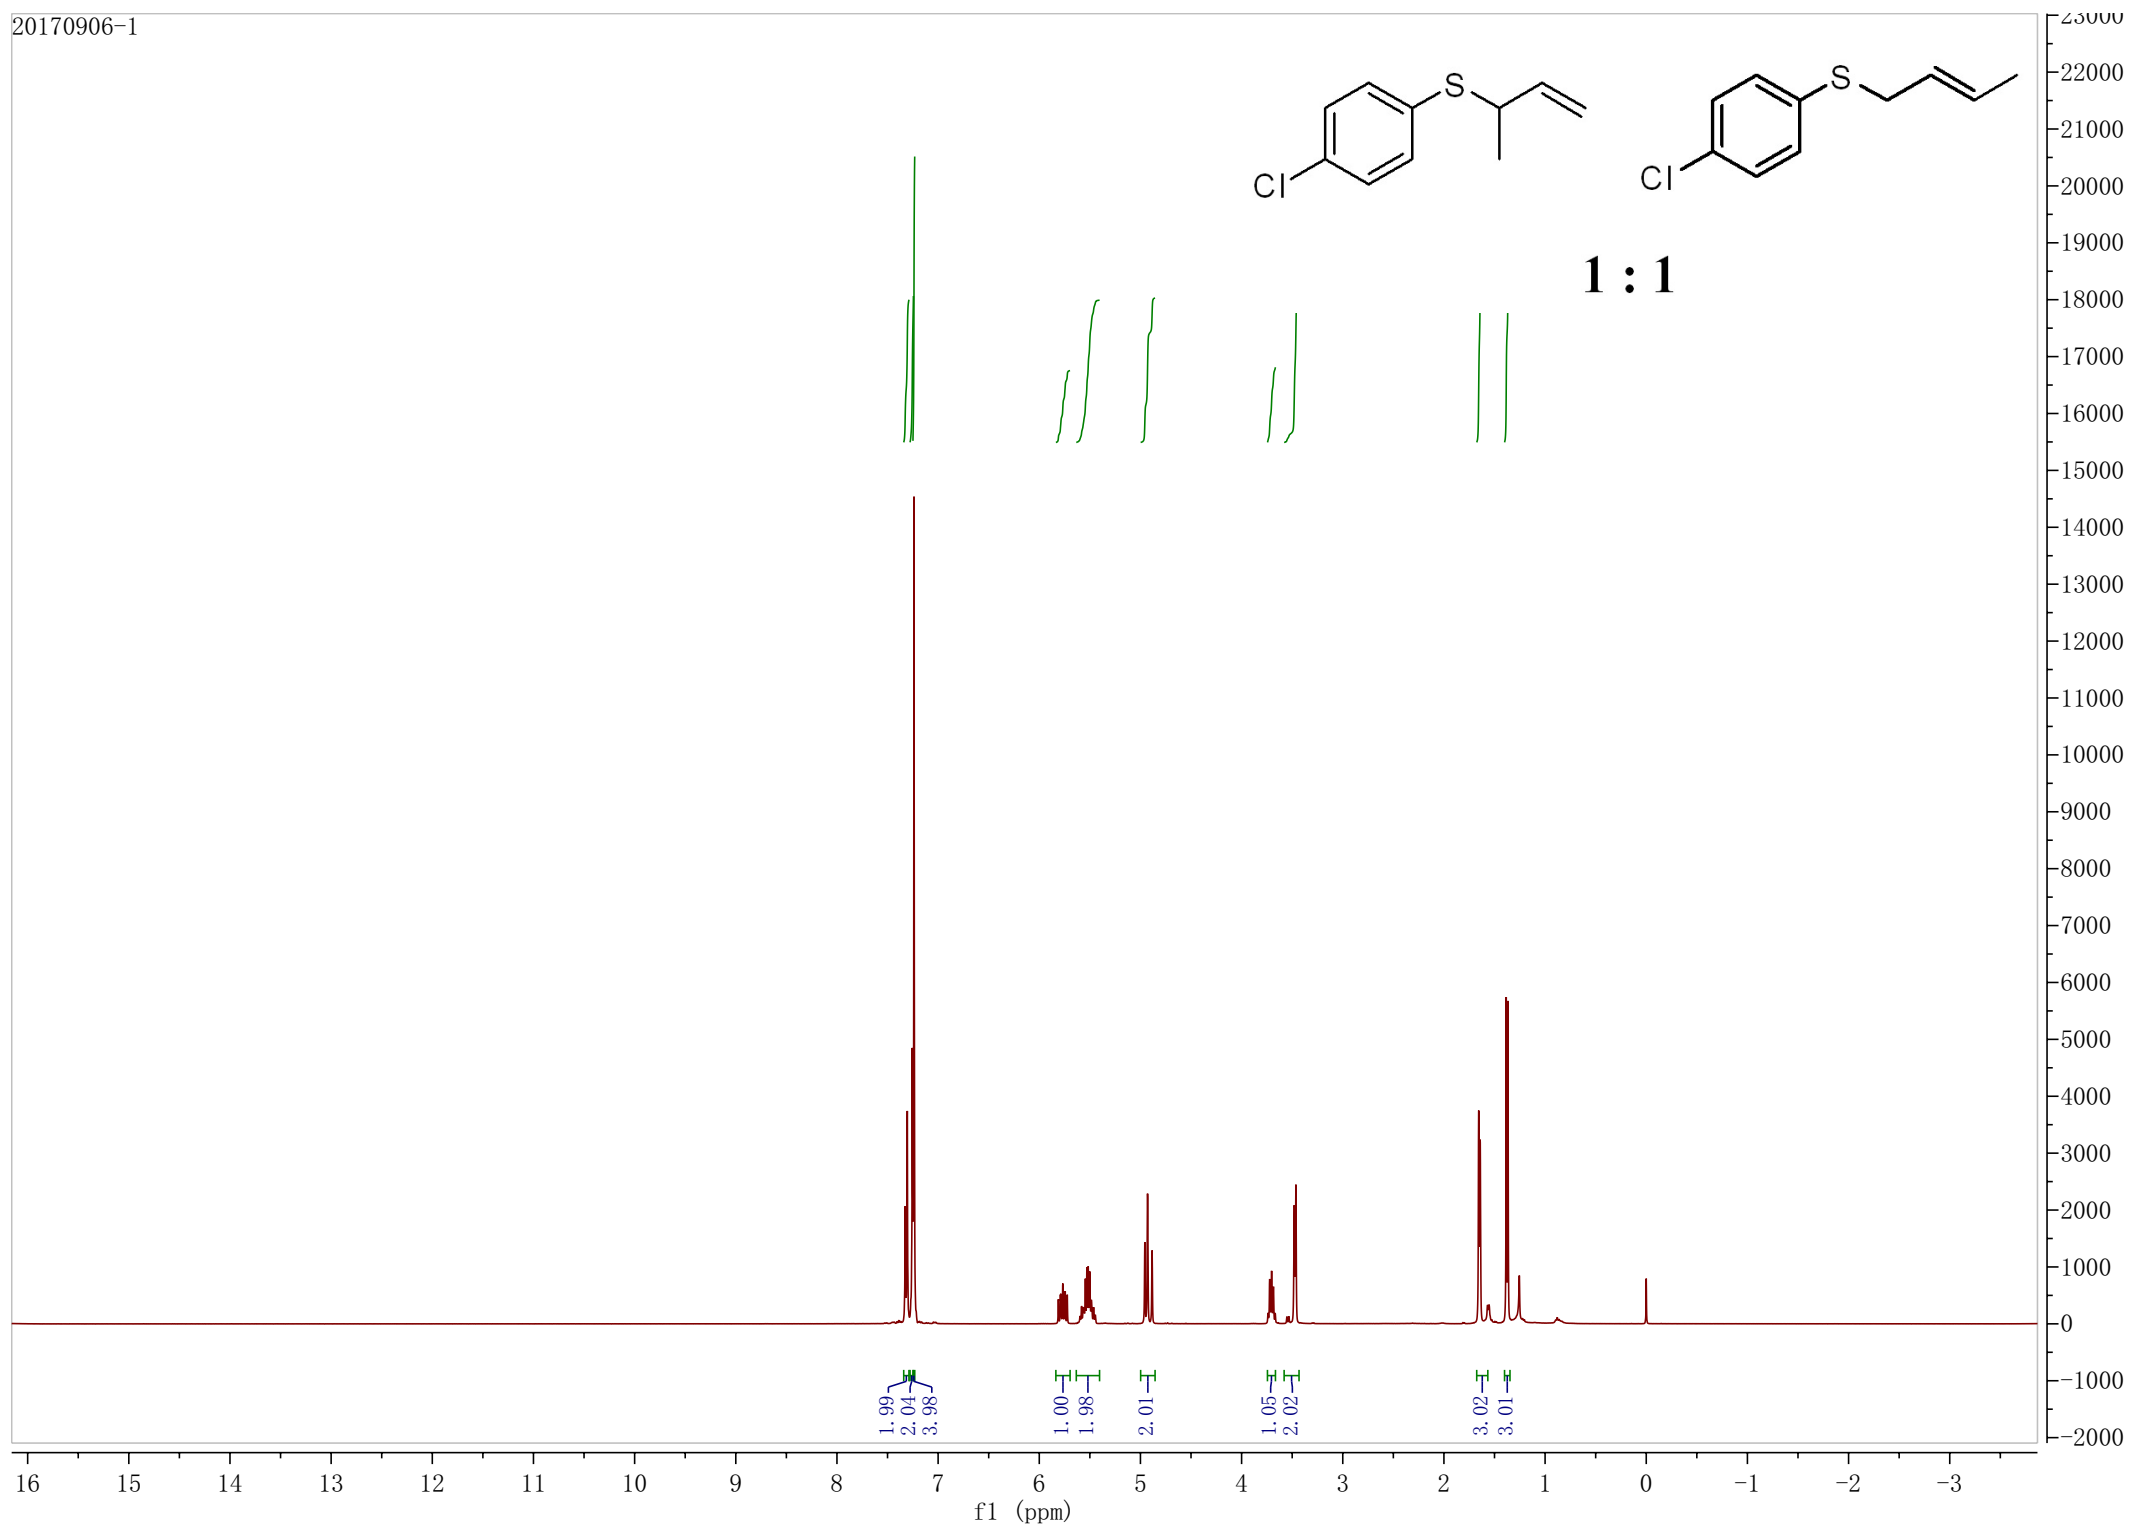

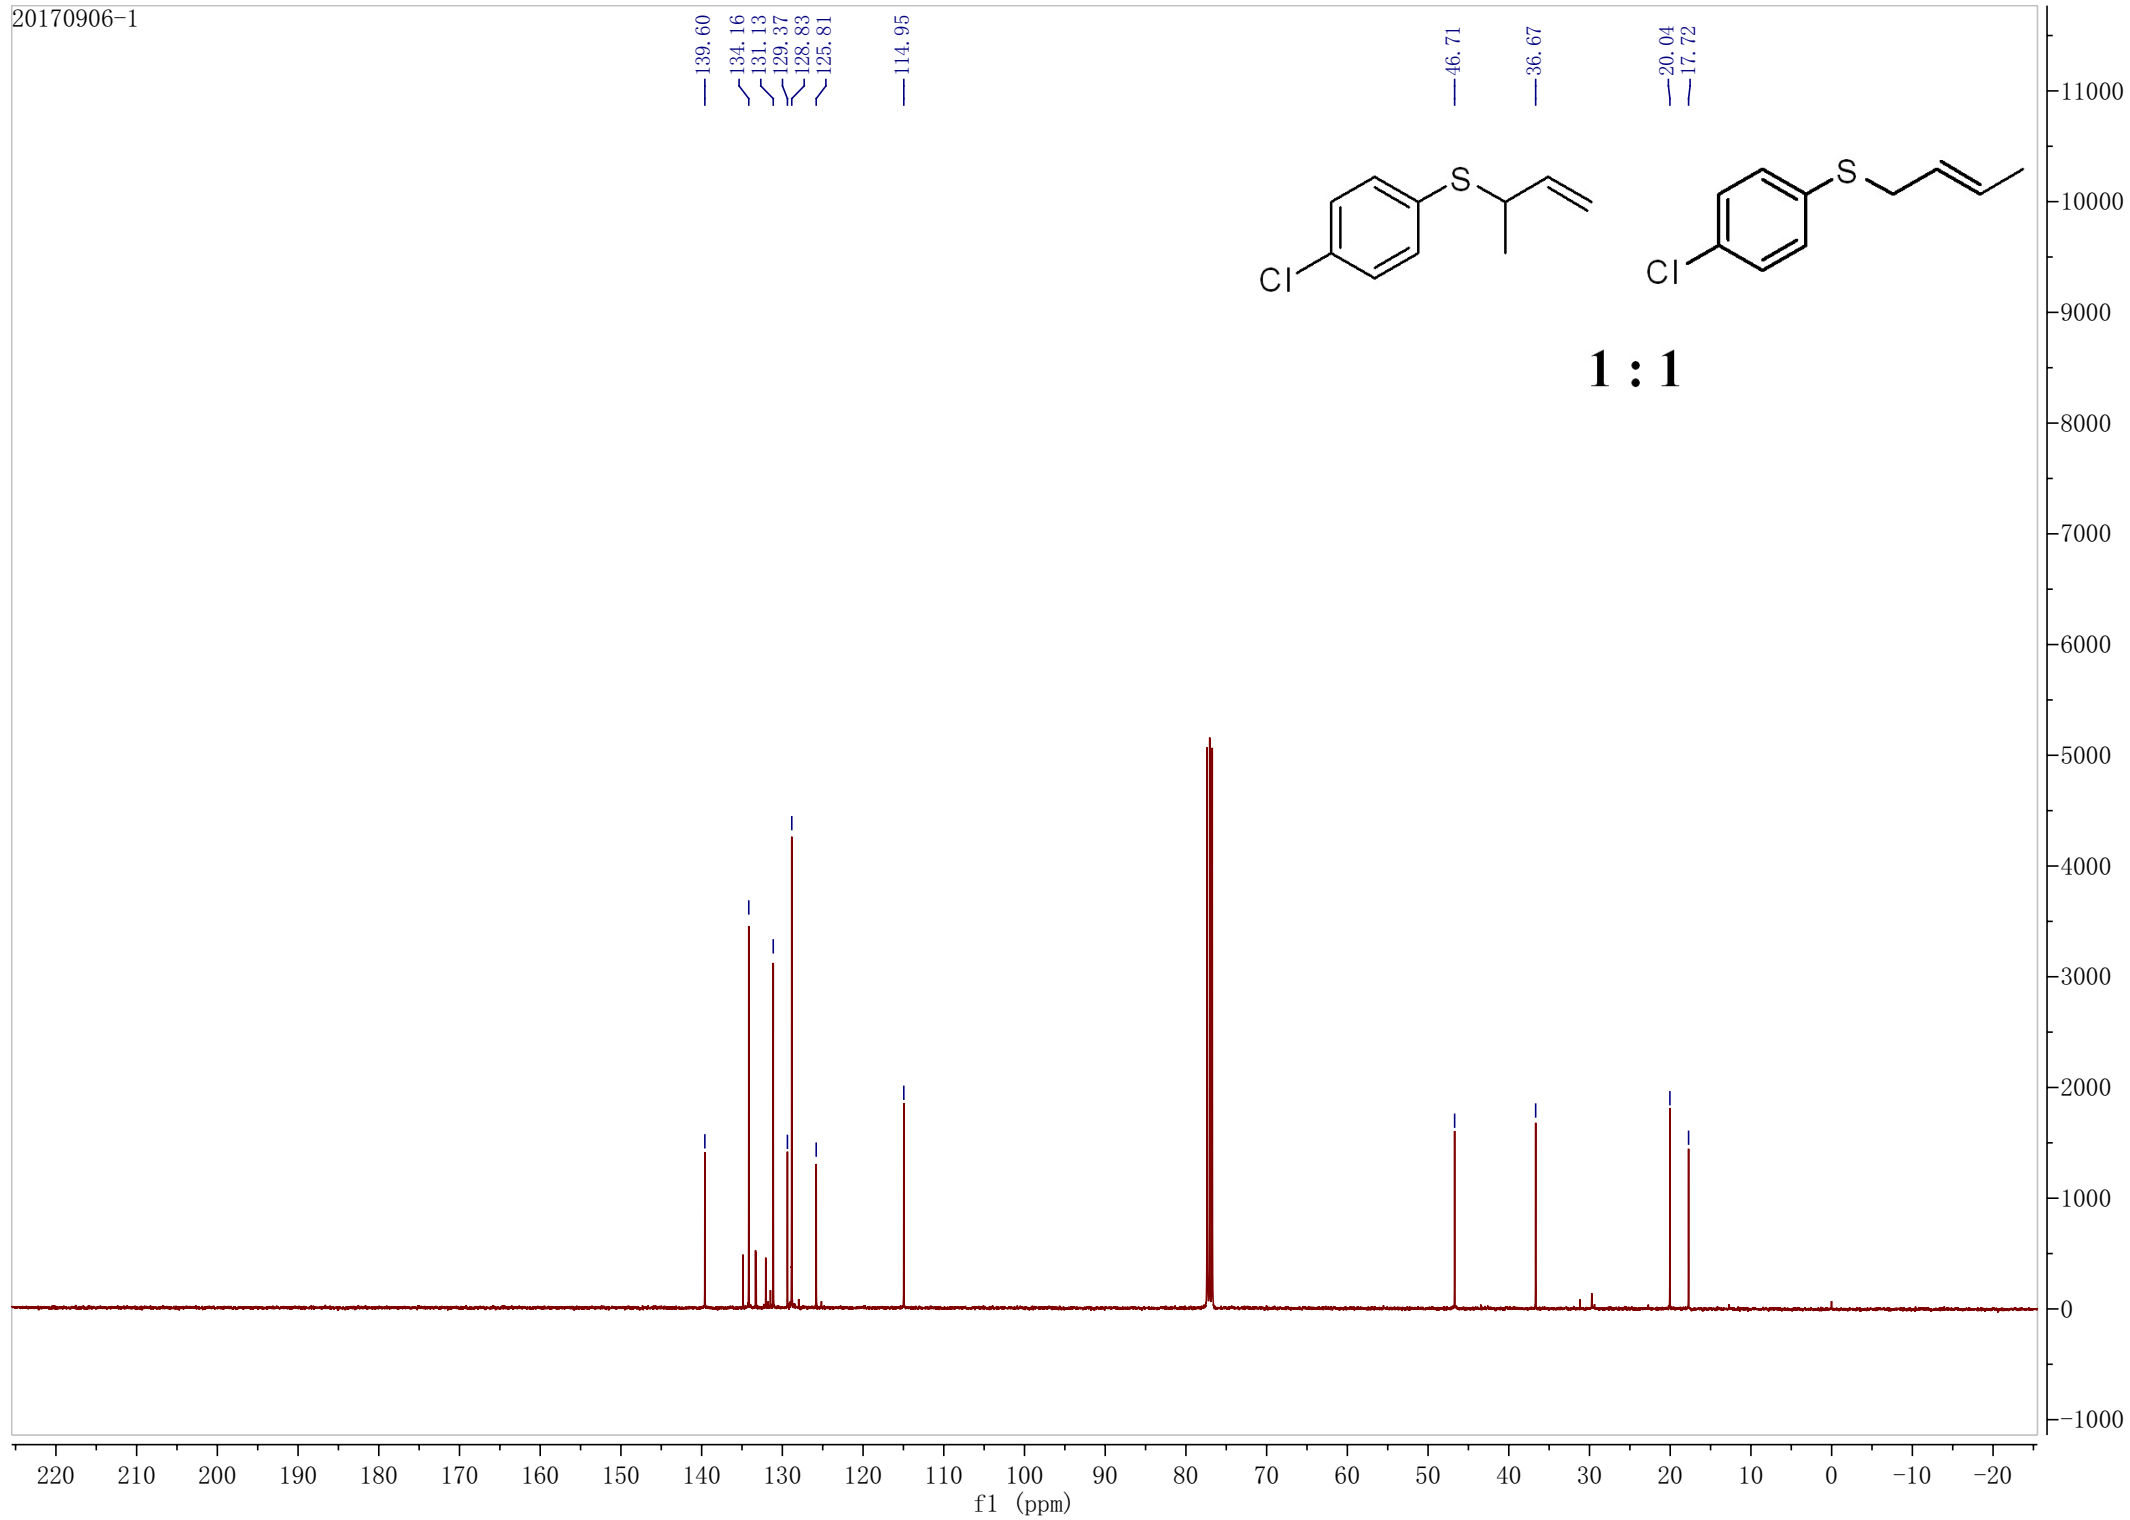

Supplement: c8ra04783a1.pdf [file c8ra04783a1.pdf]
